# Supplementary material for: Animal reactivity to camera traps and its effects on abundance estimate using distance sampling in the Taï National Park, Côte d’Ivoire
Source: PeerJ. 2022 May 27;10:e13510. doi: 10.7717/peerj.13510 (PMC9150689; doi:10.7717/peerj.13510)
Supplement: Supplemental Information 1 [file peerj-10-13510-s001.xlsx]

## Sheet: Maxwell's duiker
Transect_ID	TIME_IN_PLACE_(DAYS)	EFFort	FILE_NAME	Video_Name	Starting_date	Date_observation	Time_observation	Year	Month	Day	Hour	Minute	Second	Ind_No	Distance_(m)	Behaviour	Reactivity
ADK01	175	315000	ADK_cam_18_117_718009_654986_20190726	8240047	2019-07-26	2019-08-24	30	2019	8	24	7	33	42	1	1.5	Moving/feeding/foraging	No reaction
ADK01	175	315000	ADK_cam_18_117_718009_654986_20190726	8240047	2019-07-26	2019-08-24	30	2019	8	24	7	33	44	1	1.5	Moving/feeding/foraging	No reaction
ADK01	175	315000	ADK_cam_18_117_718009_654986_20190726	8250050	2019-07-26	2019-08-25	31	2019	8	25	7	52	6	2	4.5	Moving/feeding/foraging	No reaction
ADK01	175	315000	ADK_cam_18_117_718009_654986_20190726	8250050	2019-07-26	2019-08-25	31	2019	8	25	7	52	8	2	4.5	Moving/feeding/foraging	No reaction
ADK01	175	315000	ADK_cam_18_117_718009_654986_20190726	8250050	2019-07-26	2019-08-25	31	2019	8	25	7	52	10	2	4.5	Moving/feeding/foraging	No reaction
ADK01	175	315000	ADK_cam_18_117_718009_654986_20190726	8250050	2019-07-26	2019-08-25	31	2019	8	25	7	52	12	2	5.5	Moving/feeding/foraging	No reaction
ADK01	175	315000	ADK_cam_18_117_718009_654986_20190726	8250050	2019-07-26	2019-08-25	31	2019	8	25	7	52	14	2	6.5	Moving/feeding/foraging	No reaction
ADK01	175	315000	ADK_cam_18_117_718009_654986_20190726	8250050	2019-07-26	2019-08-25	31	2019	8	25	7	52	16	2	6.5	Moving/feeding/foraging	No reaction
ADK01	175	315000	ADK_cam_18_117_718009_654986_20190726	8250050	2019-07-26	2019-08-25	31	2019	8	25	7	52	18	2	6.5	Moving/feeding/foraging	No reaction
ADK01	175	315000	ADK_cam_18_117_718009_654986_20190726	8250050	2019-07-26	2019-08-25	31	2019	8	25	7	52	20	2	6.5	Moving/feeding/foraging	No reaction
ADK01	175	315000	ADK_cam_18_117_718009_654986_20190726	8250051	2019-07-26	2019-08-25	31	2019	8	25	7	56	10	3	5.5	Moving/feeding/foraging	No reaction
ADK01	175	315000	ADK_cam_18_117_718009_654986_20190726	8250051	2019-07-26	2019-08-25	31	2019	8	25	7	56	12	3	5.5	Moving/feeding/foraging	No reaction
ADK01	175	315000	ADK_cam_18_117_718009_654986_20190726	8250051	2019-07-26	2019-08-25	31	2019	8	25	7	56	14	3	5.5	Moving/feeding/foraging	No reaction
ADK01	175	315000	ADK_cam_18_117_718009_654986_20190726	8250051	2019-07-26	2019-08-25	31	2019	8	25	7	56	10	4	6.5	Moving/feeding/foraging	No reaction
ADK01	175	315000	ADK_cam_18_117_718009_654986_20190726	8250051	2019-07-26	2019-08-25	31	2019	8	25	7	56	12	4	6.5	Moving/feeding/foraging	No reaction
ADK01	175	315000	ADK_cam_18_117_718009_654986_20190726	8250051	2019-07-26	2019-08-25	31	2019	8	25	7	56	14	4	6.5	Moving/feeding/foraging	No reaction
ADK01	175	315000	ADK_cam_18_117_718009_654986_20190726	8250051	2019-07-26	2019-08-25	31	2019	8	25	7	56	16	4	6.5	Moving/feeding/foraging	No reaction
ADK01	175	315000	ADK_cam_18_117_718009_654986_20190726	8250051	2019-07-26	2019-08-25	31	2019	8	25	7	56	18	4	6.5	Moving/feeding/foraging	No reaction
ADK01	175	315000	ADK_cam_18_117_718009_654986_20190726	8260054	2019-07-26	2019-08-26	32	2019	8	26	7	16	18	5	6.5	Moving/feeding/foraging	No reaction
ADK01	175	315000	ADK_cam_18_117_718009_654986_20190726	8260054	2019-07-26	2019-08-26	32	2019	8	26	7	16	20	5	6.5	Moving/feeding/foraging	No reaction
ADK01	175	315000	ADK_cam_18_117_718009_654986_20190726	8260054	2019-07-26	2019-08-26	32	2019	8	26	7	16	22	5	6.5	Moving/feeding/foraging	No reaction
ADK01	175	315000	ADK_cam_18_117_718009_654986_20190726	8260054	2019-07-26	2019-08-26	32	2019	8	26	7	16	24	5	6.5	Moving/feeding/foraging	No reaction
ADK01	175	315000	ADK_cam_18_117_718009_654986_20190726	8260054	2019-07-26	2019-08-26	32	2019	8	26	7	16	26	5	7.5	Moving/feeding/foraging	No reaction
ADK01	175	315000	ADK_cam_18_117_718009_654986_20190726	8290064	2019-07-26	2019-08-29	35	2019	8	29	7	31	32	6	6.5	Moving/feeding/foraging	No reaction
ADK01	175	315000	ADK_cam_18_117_718009_654986_20190726	8290064	2019-07-26	2019-08-29	35	2019	8	29	7	31	34	6	6.5	Moving/feeding/foraging	No reaction
ADK01	175	315000	ADK_cam_18_117_718009_654986_20190726	8290064	2019-07-26	2019-08-29	35	2019	8	29	7	31	36	6	7.5	Moving/feeding/foraging	No reaction
ADK01	175	315000	ADK_cam_18_117_718009_654986_20190726	8290064	2019-07-26	2019-08-29	35	2019	8	29	7	31	49	6	7.5	Moving/feeding/foraging	No reaction
ADK01	175	315000	ADK_cam_18_117_718009_654986_20190726	8290064	2019-07-26	2019-08-29	35	2019	8	29	7	31	51	6	7.5	Moving/feeding/foraging	No reaction
ADK01	175	315000	ADK_cam_18_117_718009_654986_20190726	8290064	2019-07-26	2019-08-29	35	2019	8	29	7	31	53	6	7.5	Moving/feeding/foraging	No reaction
ADK01	175	315000	ADK_cam_18_117_718009_654986_20190726	8290064	2019-07-26	2019-08-29	35	2019	8	29	7	31	55	6	7.5	Moving/feeding/foraging	No reaction
ADK01	175	315000	ADK_cam_18_117_718009_654986_20190726	8290064	2019-07-26	2019-08-29	35	2019	8	29	7	31	57	6	7.5	Moving/feeding/foraging	No reaction
ADK01	175	315000	ADK_cam_18_117_718009_654986_20190726	8290064	2019-07-26	2019-08-29	35	2019	8	29	7	31	59	6	7.5	Moving/feeding/foraging	No reaction
ADK01	175	315000	ADK_cam_18_117_718009_654986_20190726	8290064	2019-07-26	2019-08-29	35	2019	8	29	7	32	1	6	7.5	Moving/feeding/foraging	No reaction
ADK01	175	315000	ADK_cam_18_117_718009_654986_20190726	8290064	2019-07-26	2019-08-29	35	2019	8	29	7	32	3	6	7.5	Moving/feeding/foraging	No reaction
ADK01	175	315000	ADK_cam_18_117_718009_654986_20190726	8290064	2019-07-26	2019-08-29	35	2019	8	29	7	32	5	6	9	Moving/feeding/foraging	No reaction
ADK01	175	315000	ADK_cam_18_117_718009_654986_20190726	8290064	2019-07-26	2019-08-29	35	2019	8	29	7	32	7	6	9	Moving/feeding/foraging	No reaction
ADK01	175	315000	ADK_cam_18_117_718009_654986_20190726	8290064	2019-07-26	2019-08-29	35	2019	8	29	7	32	9	6	9	Moving/feeding/foraging	No reaction
ADK01	175	315000	ADK_cam_18_117_718009_654986_20190726	8290064	2019-07-26	2019-08-29	35	2019	8	29	7	32	11	6	9	Moving/feeding/foraging	No reaction
ADK01	175	315000	ADK_cam_18_117_718009_654986_20190726	8290064	2019-07-26	2019-08-29	35	2019	8	29	7	32	2	7	9	Moving/feeding/foraging	No reaction
ADK01	175	315000	ADK_cam_18_117_718009_654986_20190726	8290064	2019-07-26	2019-08-29	35	2019	8	29	7	32	4	7	9	Moving/feeding/foraging	No reaction
ADK01	175	315000	ADK_cam_18_117_718009_654986_20190726	8290064	2019-07-26	2019-08-29	35	2019	8	29	7	32	6	7	9	Moving/feeding/foraging	No reaction
ADK01	175	315000	ADK_cam_18_117_718009_654986_20190726	8290064	2019-07-26	2019-08-29	35	2019	8	29	7	32	8	7	9	Moving/feeding/foraging	No reaction
ADK01	175	315000	ADK_cam_18_117_718009_654986_20190726	8290064	2019-07-26	2019-08-29	35	2019	8	29	7	32	10	7	9	Moving/feeding/foraging	No reaction
ADK01	175	315000	ADK_cam_18_117_718009_654986_20190726	8290064	2019-07-26	2019-08-29	35	2019	8	29	7	32	12	7	9	Moving/feeding/foraging	No reaction
ADK01	175	315000	ADK_cam_18_117_718009_654986_20190726	8290064	2019-07-26	2019-08-29	35	2019	8	29	7	32	14	7	9	Moving/feeding/foraging	No reaction
ADK01	175	315000	ADK_cam_18_117_718009_654986_20190726	8290064	2019-07-26	2019-08-29	35	2019	8	29	7	32	16	7	9	Moving/feeding/foraging	No reaction
ADK01	175	315000	ADK_cam_18_117_718009_654986_20190726	8290064	2019-07-26	2019-08-29	35	2019	8	29	7	32	18	7	9	Moving/feeding/foraging	No reaction
ADK01	175	315000	ADK_cam_18_117_718009_654986_20190726	8290065	2019-07-26	2019-08-29	35	2019	8	29	7	33	16	8	6.5	Moving/feeding/foraging	No reaction
ADK01	175	315000	ADK_cam_18_117_718009_654986_20190726	8290065	2019-07-26	2019-08-29	35	2019	8	29	7	33	18	8	6.5	Moving/feeding/foraging	No reaction
ADK01	175	315000	ADK_cam_18_117_718009_654986_20190726	8290065	2019-07-26	2019-08-29	35	2019	8	29	7	33	20	8	6.5	Moving/feeding/foraging	No reaction
ADK01	175	315000	ADK_cam_18_117_718009_654986_20190726	8290065	2019-07-26	2019-08-29	35	2019	8	29	7	33	22	8	6.5	Moving/feeding/foraging	No reaction
ADK01	175	315000	ADK_cam_18_117_718009_654986_20190726	8290065	2019-07-26	2019-08-29	35	2019	8	29	7	33	26	9	7.5	Moving/feeding/foraging	No reaction
ADK01	175	315000	ADK_cam_18_117_718009_654986_20190726	8290065	2019-07-26	2019-08-29	35	2019	8	29	7	33	28	9	7.5	Moving/feeding/foraging	No reaction
ADK01	175	315000	ADK_cam_18_117_718009_654986_20190726	8290065	2019-07-26	2019-08-29	35	2019	8	29	7	33	30	9	7.5	Moving/feeding/foraging	No reaction
ADK01	175	315000	ADK_cam_18_117_718009_654986_20190726	8290065	2019-07-26	2019-08-29	35	2019	8	29	7	33	32	9	6.5	Moving/feeding/foraging	No reaction
ADK01	175	315000	ADK_cam_18_117_718009_654986_20190726	8290065	2019-07-26	2019-08-29	35	2019	8	29	7	33	34	9	6.5	Moving/feeding/foraging	No reaction
ADK01	175	315000	ADK_cam_18_117_718009_654986_20190726	8290065	2019-07-26	2019-08-29	35	2019	8	29	7	33	36	9	5.5	Moving/feeding/foraging	No reaction
ADK01	175	315000	ADK_cam_18_117_718009_654986_20190726	8290065	2019-07-26	2019-08-29	35	2019	8	29	7	33	38	9	5.5	Moving/feeding/foraging	No reaction
ADK01	175	315000	ADK_cam_18_117_718009_654986_20190726	9050081	2019-07-26	2019-09-05	42	2019	9	5	7	42	17	10	6.5	Moving/feeding/foraging	No reaction
ADK01	175	315000	ADK_cam_18_117_718009_654986_20190726	9050081	2019-07-26	2019-09-05	42	2019	9	5	7	42	19	10	6.5	Moving/feeding/foraging	No reaction
ADK01	175	315000	ADK_cam_18_117_718009_654986_20190726	9050081	2019-07-26	2019-09-05	42	2019	9	5	7	42	21	10	6.5	Moving/feeding/foraging	No reaction
ADK01	175	315000	ADK_cam_18_117_718009_654986_20190726	9050081	2019-07-26	2019-09-05	42	2019	9	5	7	42	23	10	6.5	Moving/feeding/foraging	No reaction
ADK01	175	315000	ADK_cam_18_117_718009_654986_20190726	9050081	2019-07-26	2019-09-05	42	2019	9	5	7	42	25	10	7.5	Moving/feeding/foraging	No reaction
ADK01	175	315000	ADK_cam_18_117_718009_654986_20190726	9050081	2019-07-26	2019-09-05	42	2019	9	5	7	42	27	10	7.5	Moving/feeding/foraging	No reaction
ADK01	175	315000	ADK_cam_18_117_718009_654986_20190726	9060084	2019-07-26	2019-09-06	43	2019	9	6	7	28	44	11	2.5	Moving/feeding/foraging	No reaction
ADK01	175	315000	ADK_cam_18_117_718009_654986_20190726	9060084	2019-07-26	2019-09-06	43	2019	9	6	7	28	46	11	1.5	Moving/feeding/foraging	No reaction
ADK01	175	315000	ADK_cam_18_117_718009_654986_20190726	9110105	2019-07-26	2019-09-11	48	2019	9	11	7	17	51	12	7.5	Moving/feeding/foraging	No reaction
ADK01	175	315000	ADK_cam_18_117_718009_654986_20190726	9110105	2019-07-26	2019-09-11	48	2019	9	11	7	17	53	12	7.5	Moving/feeding/foraging	No reaction
ADK01	175	315000	ADK_cam_18_117_718009_654986_20190726	9110105	2019-07-26	2019-09-11	48	2019	9	11	7	17	55	12	7.5	Moving/feeding/foraging	No reaction
ADK01	175	315000	ADK_cam_18_117_718009_654986_20190726	9110105	2019-07-26	2019-09-11	48	2019	9	11	7	17	57	12	7.5	Moving/feeding/foraging	No reaction
ADK01	175	315000	ADK_cam_18_117_718009_654986_20190726	9110105	2019-07-26	2019-09-11	48	2019	9	11	7	17	59	12	7.5	Moving/feeding/foraging	No reaction
ADK01	175	315000	ADK_cam_18_117_718009_654986_20190726	9110105	2019-07-26	2019-09-11	48	2019	9	11	7	18	2	13	7.5	Moving/feeding/foraging	No reaction
ADK01	175	315000	ADK_cam_18_117_718009_654986_20190726	9110105	2019-07-26	2019-09-11	48	2019	9	11	7	18	4	13	7.5	Moving/feeding/foraging	No reaction
ADK01	175	315000	ADK_cam_18_117_718009_654986_20190726	9110105	2019-07-26	2019-09-11	48	2019	9	11	7	18	6	13	7.5	Moving/feeding/foraging	No reaction
ADK01	175	315000	ADK_cam_18_117_718009_654986_20190726	9110105	2019-07-26	2019-09-11	48	2019	9	11	7	18	8	13	7.5	Moving/feeding/foraging	No reaction
ADK01	175	315000	ADK_cam_18_117_718009_654986_20190726	9110105	2019-07-26	2019-09-11	48	2019	9	11	7	18	10	13	7.5	Moving/feeding/foraging	No reaction
ADK01	175	315000	ADK_cam_18_117_718009_654986_20190726	9110105	2019-07-26	2019-09-11	48	2019	9	11	7	18	12	13	7.5	Moving/feeding/foraging	No reaction
ADK01	175	315000	ADK_cam_18_117_718009_654986_20190726	9110105	2019-07-26	2019-09-11	48	2019	9	11	7	18	14	13	7.5	Moving/feeding/foraging	No reaction
ADK01	175	315000	ADK_cam_18_117_718009_654986_20190726	9110105	2019-07-26	2019-09-11	48	2019	9	11	7	18	16	13	7.5	Moving/feeding/foraging	No reaction
ADK01	175	315000	ADK_cam_18_117_718009_654986_20190726	9110105	2019-07-26	2019-09-11	48	2019	9	11	7	18	18	13	7.5	Moving/feeding/foraging	No reaction
ADK01	175	315000	ADK_cam_18_117_718009_654986_20190726	9110105	2019-07-26	2019-09-11	48	2019	9	11	7	18	20	13	7.5	Moving/feeding/foraging	No reaction
ADK01	175	315000	ADK_cam_18_117_718009_654986_20190726	9120107	2019-07-26	2019-09-12	49	2019	9	12	7	17	24	14	6.5	Moving/feeding/foraging	No reaction
ADK01	175	315000	ADK_cam_18_117_718009_654986_20190726	9120107	2019-07-26	2019-09-12	49	2019	9	12	7	17	26	14	6.5	Moving/feeding/foraging	No reaction
ADK01	175	315000	ADK_cam_18_117_718009_654986_20190726	9120107	2019-07-26	2019-09-12	49	2019	9	12	7	17	28	14	7.5	Moving/feeding/foraging	No reaction
ADK01	175	315000	ADK_cam_18_117_718009_654986_20190726	9120107	2019-07-26	2019-09-12	49	2019	9	12	7	17	30	14	7.5	Moving/feeding/foraging	No reaction
ADK01	175	315000	ADK_cam_18_117_718009_654986_20190726	9120107	2019-07-26	2019-09-12	49	2019	9	12	7	17	32	14	9	Moving/feeding/foraging	No reaction
ADK01	175	315000	ADK_cam_18_117_718009_654986_20190726	9120107	2019-07-26	2019-09-12	49	2019	9	12	7	17	34	14	9	Moving/feeding/foraging	No reaction
ADK01	175	315000	ADK_cam_18_117_718009_654986_20190726	9120107	2019-07-26	2019-09-12	49	2019	9	12	7	17	24	15	11	Moving/feeding/foraging	No reaction
ADK01	175	315000	ADK_cam_18_117_718009_654986_20190726	9120107	2019-07-26	2019-09-12	49	2019	9	12	7	17	26	15	11	Moving/feeding/foraging	No reaction
ADK01	175	315000	ADK_cam_18_117_718009_654986_20190726	9120107	2019-07-26	2019-09-12	49	2019	9	12	7	17	28	15	11	Moving/feeding/foraging	No reaction
ADK01	175	315000	ADK_cam_18_117_718009_654986_20190726	9120107	2019-07-26	2019-09-12	49	2019	9	12	7	17	30	15	11	Moving/feeding/foraging	No reaction
ADK01	175	315000	ADK_cam_18_117_718009_654986_20190726	9120107	2019-07-26	2019-09-12	49	2019	9	12	7	17	32	15	11	Moving/feeding/foraging	No reaction
ADK01	175	315000	ADK_cam_18_117_718009_654986_20190726	9120107	2019-07-26	2019-09-12	49	2019	9	12	7	17	34	15	11	Moving/feeding/foraging	No reaction
ADK01	175	315000	ADK_cam_18_117_718009_654986_20190726	9120107	2019-07-26	2019-09-12	49	2019	9	12	7	17	36	15	11	Moving/feeding/foraging	No reaction
ADK01	175	315000	ADK_cam_18_117_718009_654986_20190726	9120107	2019-07-26	2019-09-12	49	2019	9	12	7	17	38	15	13.5	Moving/feeding/foraging	No reaction
ADK01	175	315000	ADK_cam_18_117_718009_654986_20190726	9120107	2019-07-26	2019-09-12	49	2019	9	12	7	17	40	15	13.5	Moving/feeding/foraging	No reaction
ADK01	175	315000	ADK_cam_18_117_718009_654986_20190726	9120107	2019-07-26	2019-09-12	49	2019	9	12	7	17	57	16	9	Moving/feeding/foraging	No reaction
ADK01	175	315000	ADK_cam_18_117_718009_654986_20190726	9120107	2019-07-26	2019-09-12	49	2019	9	12	7	17	59	16	9	Moving/feeding/foraging	No reaction
ADK01	175	315000	ADK_cam_18_117_718009_654986_20190726	9120107	2019-07-26	2019-09-12	49	2019	9	12	7	18	1	16	9	Moving/feeding/foraging	No reaction
ADK01	175	315000	ADK_cam_18_117_718009_654986_20190726	9120107	2019-07-26	2019-09-12	49	2019	9	12	7	18	3	16	9	Moving/feeding/foraging	No reaction
ADK01	175	315000	ADK_cam_18_117_718009_654986_20190726	9120107	2019-07-26	2019-09-12	49	2019	9	12	7	18	5	16	9	Moving/feeding/foraging	No reaction
ADK01	175	315000	ADK_cam_18_117_718009_654986_20190726	9120107	2019-07-26	2019-09-12	49	2019	9	12	7	18	7	16	9	Moving/feeding/foraging	No reaction
ADK01	175	315000	ADK_cam_18_117_718009_654986_20190726	9120107	2019-07-26	2019-09-12	49	2019	9	12	7	18	9	16	9	Moving/feeding/foraging	No reaction
ADK01	175	315000	ADK_cam_18_117_718009_654986_20190726	9120107	2019-07-26	2019-09-12	49	2019	9	12	7	18	11	16	9	Moving/feeding/foraging	No reaction
ADK01	175	315000	ADK_cam_18_117_718009_654986_20190726	9140111	2019-07-26	2019-09-14	51	2019	9	14	7	1	11	17	6.5	Moving/feeding/foraging	No reaction
ADK01	175	315000	ADK_cam_18_117_718009_654986_20190726	9140111	2019-07-26	2019-09-14	51	2019	9	14	7	1	13	17	6.5	Moving/feeding/foraging	No reaction
ADK01	175	315000	ADK_cam_18_117_718009_654986_20190726	9140111	2019-07-26	2019-09-14	51	2019	9	14	7	1	15	17	6.5	Moving/feeding/foraging	No reaction
ADK01	175	315000	ADK_cam_18_117_718009_654986_20190726	9140111	2019-07-26	2019-09-14	51	2019	9	14	7	1	17	17	6.5	Moving/feeding/foraging	No reaction
ADK01	175	315000	ADK_cam_18_117_718009_654986_20190726	9140111	2019-07-26	2019-09-14	51	2019	9	14	7	1	19	17	6.5	Moving/feeding/foraging	No reaction
ADK01	175	315000	ADK_cam_18_117_718009_654986_20190726	9140111	2019-07-26	2019-09-14	51	2019	9	14	7	1	21	17	6.5	Moving/feeding/foraging	No reaction
ADK01	175	315000	ADK_cam_18_117_718009_654986_20190726	9140111	2019-07-26	2019-09-14	51	2019	9	14	7	1	23	17	6.5	Moving/feeding/foraging	No reaction
ADK01	175	315000	ADK_cam_18_117_718009_654986_20190726	9140111	2019-07-26	2019-09-14	51	2019	9	14	7	1	25	17	6.5	Moving/feeding/foraging	No reaction
ADK01	175	315000	ADK_cam_18_117_718009_654986_20190726	9140111	2019-07-26	2019-09-14	51	2019	9	14	7	1	27	17	6.5	Moving/feeding/foraging	No reaction
ADK01	175	315000	ADK_cam_18_117_718009_654986_20190726	9140111	2019-07-26	2019-09-14	51	2019	9	14	7	1	29	17	6.5	Moving/feeding/foraging	No reaction
ADK01	175	315000	ADK_cam_18_117_718009_654986_20190726	9140111	2019-07-26	2019-09-14	51	2019	9	14	7	1	31	17	6.5	Moving/feeding/foraging	No reaction
ADK01	175	315000	ADK_cam_18_117_718009_654986_20190726	9140111	2019-07-26	2019-09-14	51	2019	9	14	7	1	33	17	6.5	Moving/feeding/foraging	No reaction
ADK01	175	315000	ADK_cam_18_117_718009_654986_20190726	9140111	2019-07-26	2019-09-14	51	2019	9	14	7	1	35	17	6.5	Moving/feeding/foraging	No reaction
ADK01	175	315000	ADK_cam_18_117_718009_654986_20190726	9140111	2019-07-26	2019-09-14	51	2019	9	14	7	1	37	17	7.5	Moving/feeding/foraging	No reaction
ADK01	175	315000	ADK_cam_18_117_718009_654986_20190726	9140111	2019-07-26	2019-09-14	51	2019	9	14	7	1	39	17	7.5	Moving/feeding/foraging	No reaction
ADK01	175	315000	ADK_cam_18_117_718009_654986_20190726	9140111	2019-07-26	2019-09-14	51	2019	9	14	7	1	41	17	7.5	Moving/feeding/foraging	No reaction
ADK01	175	315000	ADK_cam_18_117_718009_654986_20190726	9140111	2019-07-26	2019-09-14	51	2019	9	14	7	1	43	17	7.5	Moving/feeding/foraging	No reaction
ADK01	175	315000	ADK_cam_18_117_718009_654986_20190726	9140111	2019-07-26	2019-09-14	51	2019	9	14	7	1	45	17	7.5	Moving/feeding/foraging	No reaction
ADK01	175	315000	ADK_cam_18_117_718009_654986_20190726	9140111	2019-07-26	2019-09-14	51	2019	9	14	7	1	47	17	7.5	Moving/feeding/foraging	No reaction
ADK01	175	315000	ADK_cam_18_117_718009_654986_20190726	9140111	2019-07-26	2019-09-14	51	2019	9	14	7	1	49	17	7.5	Moving/feeding/foraging	No reaction
ADK01	175	315000	ADK_cam_18_117_718009_654986_20190726	9140111	2019-07-26	2019-09-14	51	2019	9	14	7	1	51	17	7.5	Moving/feeding/foraging	No reaction
ADK01	175	315000	ADK_cam_18_117_718009_654986_20190726	9140111	2019-07-26	2019-09-14	51	2019	9	14	7	1	53	17	7.5	Moving/feeding/foraging	No reaction
ADK01	175	315000	ADK_cam_18_117_718009_654986_20190726	9140111	2019-07-26	2019-09-14	51	2019	9	14	7	1	55	17	7.5	Moving/feeding/foraging	No reaction
ADK01	175	315000	ADK_cam_18_117_718009_654986_20190726	9150115	2019-07-26	2019-09-15	52	2019	9	15	7	20	23	18	7.5	Moving/feeding/foraging	No reaction
ADK01	175	315000	ADK_cam_18_117_718009_654986_20190726	9150115	2019-07-26	2019-09-15	52	2019	9	15	7	20	25	18	7.5	Moving/feeding/foraging	No reaction
ADK01	175	315000	ADK_cam_18_117_718009_654986_20190726	9150115	2019-07-26	2019-09-15	52	2019	9	15	7	20	27	18	7.5	Moving/feeding/foraging	No reaction
ADK01	175	315000	ADK_cam_18_117_718009_654986_20190726	9150115	2019-07-26	2019-09-15	52	2019	9	15	7	20	29	18	7.5	Moving/feeding/foraging	No reaction
ADK01	175	315000	ADK_cam_18_117_718009_654986_20190726	9150115	2019-07-26	2019-09-15	52	2019	9	15	7	20	31	18	7.5	Moving/feeding/foraging	No reaction
ADK01	175	315000	ADK_cam_18_117_718009_654986_20190726	9150115	2019-07-26	2019-09-15	52	2019	9	15	7	20	33	18	7.5	Moving/feeding/foraging	No reaction
ADK01	175	315000	ADK_cam_18_117_718009_654986_20190726	9150115	2019-07-26	2019-09-15	52	2019	9	15	7	20	35	18	9	Moving/feeding/foraging	No reaction
ADK01	175	315000	ADK_cam_18_117_718009_654986_20190726	9150115	2019-07-26	2019-09-15	52	2019	9	15	7	20	37	18	9	Moving/feeding/foraging	No reaction
ADK01	175	315000	ADK_cam_18_117_718009_654986_20190726	9150115	2019-07-26	2019-09-15	52	2019	9	15	7	20	39	18	9	Moving/feeding/foraging	No reaction
ADK01	175	315000	ADK_cam_18_117_718009_654986_20190726	9150115	2019-07-26	2019-09-15	52	2019	9	15	7	20	41	18	9	Moving/feeding/foraging	No reaction
ADK01	175	315000	ADK_cam_18_117_718009_654986_20190726	9150115	2019-07-26	2019-09-15	52	2019	9	15	7	20	43	18	9	Moving/feeding/foraging	No reaction
ADK01	175	315000	ADK_cam_18_117_718009_654986_20190726	9150115	2019-07-26	2019-09-15	52	2019	9	15	7	20	45	18	9	Moving/feeding/foraging	No reaction
ADK01	175	315000	ADK_cam_18_117_718009_654986_20190726	9150115	2019-07-26	2019-09-15	52	2019	9	15	7	20	47	18	9	Moving/feeding/foraging	No reaction
ADK01	175	315000	ADK_cam_18_117_718009_654986_20190726	9150115	2019-07-26	2019-09-15	52	2019	9	15	7	20	49	18	9	Moving/feeding/foraging	No reaction
ADK01	175	315000	ADK_cam_18_117_718009_654986_20190726	9150115	2019-07-26	2019-09-15	52	2019	9	15	7	20	51	18	9	Moving/feeding/foraging	No reaction
ADK01	175	315000	ADK_cam_18_117_718009_654986_20190726	9150115	2019-07-26	2019-09-15	52	2019	9	15	7	20	53	18	9	Moving/feeding/foraging	No reaction
ADK01	175	315000	ADK_cam_18_117_718009_654986_20190726	9150115	2019-07-26	2019-09-15	52	2019	9	15	7	20	55	18	9	Moving/feeding/foraging	No reaction
ADK01	175	315000	ADK_cam_18_117_718009_654986_20190726	9150115	2019-07-26	2019-09-15	52	2019	9	15	7	20	57	18	9	Moving/feeding/foraging	No reaction
ADK01	175	315000	ADK_cam_18_117_718009_654986_20190726	9150116	2019-07-26	2019-09-15	52	2019	9	15	7	24	35	19	4.5	Moving/feeding/foraging	No reaction
ADK01	175	315000	ADK_cam_18_117_718009_654986_20190726	9150116	2019-07-26	2019-09-15	52	2019	9	15	7	24	37	19	3.5	Moving/feeding/foraging	No reaction
ADK01	175	315000	ADK_cam_18_117_718009_654986_20190726	9150116	2019-07-26	2019-09-15	52	2019	9	15	7	24	39	19	2.5	Moving/feeding/foraging	No reaction
ADK01	175	315000	ADK_cam_18_117_718009_654986_20190726	9220138	2019-07-26	2019-09-22	59	2019	9	22	7	29	50	20	7.5	Moving/feeding/foraging	No reaction
ADK01	175	315000	ADK_cam_18_117_718009_654986_20190726	9220138	2019-07-26	2019-09-22	59	2019	9	22	7	29	52	20	7.5	Moving/feeding/foraging	No reaction
ADK01	175	315000	ADK_cam_18_117_718009_654986_20190726	9220138	2019-07-26	2019-09-22	59	2019	9	22	7	29	54	20	7.5	Moving/feeding/foraging	No reaction
ADK01	175	315000	ADK_cam_18_117_718009_654986_20190726	9220138	2019-07-26	2019-09-22	59	2019	9	22	7	29	56	20	7.5	Moving/feeding/foraging	No reaction
ADK01	175	315000	ADK_cam_18_117_718009_654986_20190726	9220138	2019-07-26	2019-09-22	59	2019	9	22	7	29	58	20	7.5	Moving/feeding/foraging	No reaction
ADK01	175	315000	ADK_cam_18_117_718009_654986_20190726	9270166	2019-07-26	2019-09-27	64	2019	9	27	7	46	12	21	7.5	Moving/feeding/foraging	No reaction
ADK01	175	315000	ADK_cam_18_117_718009_654986_20190726	9270166	2019-07-26	2019-09-27	64	2019	9	27	7	46	14	21	7.5	Moving/feeding/foraging	No reaction
ADK01	175	315000	ADK_cam_18_117_718009_654986_20190726	9270166	2019-07-26	2019-09-27	64	2019	9	27	7	46	16	21	7.5	Moving/feeding/foraging	No reaction
ADK01	175	315000	ADK_cam_18_117_718009_654986_20190726	9270166	2019-07-26	2019-09-27	64	2019	9	27	7	46	18	21	7.5	Moving/feeding/foraging	No reaction
ADK01	175	315000	ADK_cam_18_117_718009_654986_20190726	9270166	2019-07-26	2019-09-27	64	2019	9	27	7	46	20	21	7.5	Moving/feeding/foraging	No reaction
ADK01	175	315000	ADK_cam_18_117_718009_654986_20190726	10050192	2019-07-26	2019-10-05	72	2019	10	5	7	12	40	22	5.5	Moving/feeding/foraging	No reaction
ADK01	175	315000	ADK_cam_18_117_718009_654986_20190726	10050192	2019-07-26	2019-10-05	72	2019	10	5	7	12	42	22	5.5	Moving/feeding/foraging	No reaction
ADK01	175	315000	ADK_cam_18_117_718009_654986_20190726	10050192	2019-07-26	2019-10-05	72	2019	10	5	7	12	40	23	5.5	Moving/feeding/foraging	No reaction
ADK01	175	315000	ADK_cam_18_117_718009_654986_20190726	10050192	2019-07-26	2019-10-05	72	2019	10	5	7	12	42	23	5.5	Moving/feeding/foraging	No reaction
ADK01	175	315000	ADK_cam_18_117_718009_654986_20190726	10050192	2019-07-26	2019-10-05	72	2019	10	5	7	12	44	23	5.5	Moving/feeding/foraging	No reaction
ADK01	175	315000	ADK_cam_18_117_718009_654986_20190726	10050193	2019-07-26	2019-10-05	72	2019	10	5	7	30	5	24	7.5	Moving/feeding/foraging	No reaction
ADK01	175	315000	ADK_cam_18_117_718009_654986_20190726	10050193	2019-07-26	2019-10-05	72	2019	10	5	7	30	7	24	7.5	Moving/feeding/foraging	No reaction
ADK01	175	315000	ADK_cam_18_117_718009_654986_20190726	10050193	2019-07-26	2019-10-05	72	2019	10	5	7	30	9	24	9	Moving/feeding/foraging	No reaction
ADK01	175	315000	ADK_cam_18_117_718009_654986_20190726	10050193	2019-07-26	2019-10-05	72	2019	10	5	7	30	11	24	9	Moving/feeding/foraging	No reaction
ADK01	175	315000	ADK_cam_18_117_718009_654986_20190726	10050193	2019-07-26	2019-10-05	72	2019	10	5	7	30	13	24	9	Moving/feeding/foraging	No reaction
ADK01	175	315000	ADK_cam_18_117_718009_654986_20190726	10050193	2019-07-26	2019-10-05	72	2019	10	5	7	30	15	24	9	Moving/feeding/foraging	No reaction
ADK01	175	315000	ADK_cam_18_117_718009_654986_20190726	10050194	2019-07-26	2019-10-05	72	2019	10	5	7	33	16	25	7.5	Moving/feeding/foraging	No reaction
ADK01	175	315000	ADK_cam_18_117_718009_654986_20190726	10060200	2019-07-26	2019-10-06	73	2019	10	6	7	30	17	26	1.5	Moving/feeding/foraging	No reaction
ADK01	175	315000	ADK_cam_18_117_718009_654986_20190726	10060200	2019-07-26	2019-10-06	73	2019	10	6	7	30	19	26	1.5	Moving/feeding/foraging	No reaction
ADK01	175	315000	ADK_cam_18_117_718009_654986_20190726	10120238	2019-07-26	2019-10-12	79	2019	10	12	7	45	25	27	7.5	Moving/feeding/foraging	No reaction
ADK01	175	315000	ADK_cam_18_117_718009_654986_20190726	10120238	2019-07-26	2019-10-12	79	2019	10	12	7	45	27	27	7.5	Moving/feeding/foraging	No reaction
ADK01	175	315000	ADK_cam_18_117_718009_654986_20190726	10130243	2019-07-26	2019-10-13	80	2019	10	13	7	12	40	28	2.5	Moving/feeding/foraging	No reaction
ADK01	175	315000	ADK_cam_18_117_718009_654986_20190726	10130243	2019-07-26	2019-10-13	80	2019	10	13	7	12	42	28	2.5	Moving/feeding/foraging	No reaction
ADK01	175	315000	ADK_cam_18_117_718009_654986_20190726	11020289	2019-07-26	2019-11-02	100	2019	11	2	7	24	55	29	9	Moving/feeding/foraging	No reaction
ADK01	175	315000	ADK_cam_18_117_718009_654986_20190726	11200322	2019-07-26	2019-11-20	118	2019	11	20	7	48	40	30	5.5	Moving/feeding/foraging	No reaction
ADK01	175	315000	ADK_cam_18_117_718009_654986_20190726	11200322	2019-07-26	2019-11-20	118	2019	11	20	7	48	42	30	5.5	Moving/feeding/foraging	No reaction
ADK01	175	315000	ADK_cam_18_117_718009_654986_20190726	11200322	2019-07-26	2019-11-20	118	2019	11	20	7	48	44	30	5.5	Moving/feeding/foraging	No reaction
ADK01	175	315000	ADK_cam_18_117_718009_654986_20190726	11200322	2019-07-26	2019-11-20	118	2019	11	20	7	48	40	31	6.5	Moving/feeding/foraging	No reaction
ADK01	175	315000	ADK_cam_18_117_718009_654986_20190726	11200322	2019-07-26	2019-11-20	118	2019	11	20	7	48	42	31	6.5	Moving/feeding/foraging	No reaction
ADK01	175	315000	ADK_cam_18_117_718009_654986_20190726	11200322	2019-07-26	2019-11-20	118	2019	11	20	7	48	44	31	6.5	Moving/feeding/foraging	No reaction
ADK01	175	315000	ADK_cam_18_117_718009_654986_20190726	11200323	2019-07-26	2019-11-20	118	2019	11	20	7	48	47	32	5.5	Moving/feeding/foraging	No reaction
ADK01	175	315000	ADK_cam_18_117_718009_654986_20190726	11200323	2019-07-26	2019-11-20	118	2019	11	20	7	48	49	32	5.5	Moving/feeding/foraging	No reaction
ADK01	175	315000	ADK_cam_18_117_718009_654986_20190726	11200323	2019-07-26	2019-11-20	118	2019	11	20	7	48	51	32	5.5	Moving/feeding/foraging	No reaction
ADK01	175	315000	ADK_cam_18_117_718009_654986_20190726	11200323	2019-07-26	2019-11-20	118	2019	11	20	7	48	47	33	6.5	Moving/feeding/foraging	No reaction
ADK01	175	315000	ADK_cam_18_117_718009_654986_20190726	11200323	2019-07-26	2019-11-20	118	2019	11	20	7	48	49	33	6.5	Moving/feeding/foraging	No reaction
ADK01	175	315000	ADK_cam_18_117_718009_654986_20190726	11200323	2019-07-26	2019-11-20	118	2019	11	20	7	48	51	33	7.5	Moving/feeding/foraging	No reaction
ADK01	175	315000	ADK_cam_18_117_718009_654986_20190726	11220324	2019-07-26	2019-11-22	120	2019	11	22	7	12	15	34	11	Moving/feeding/foraging	No reaction
ADK01	175	315000	ADK_cam_18_117_718009_654986_20190726	11220324	2019-07-26	2019-11-22	120	2019	11	22	7	12	17	34	11	Moving/feeding/foraging	No reaction
ADK01	175	315000	ADK_cam_18_117_718009_654986_20190726	11220325	2019-07-26	2019-11-22	120	2019	11	22	7	22	25	35	7.5	Moving/feeding/foraging	No reaction
ADK01	175	315000	ADK_cam_18_117_718009_654986_20190726	12280454	2019-07-26	2019-12-28	156	2019	12	28	7	57	44	36	1.5	Moving/feeding/foraging	No reaction
ADK01	175	315000	ADK_cam_18_117_718009_654986_20190726	12280454	2019-07-26	2019-12-28	156	2019	12	28	7	57	46	36	1.5	Moving/feeding/foraging	No reaction
ADK01	175	315000	ADK_cam_18_117_718009_654986_20190726	12280454	2019-07-26	2019-12-28	156	2019	12	28	7	57	48	36	1.5	Moving/feeding/foraging	No reaction
ADK01	175	315000	ADK_cam_18_117_718009_654986_20190726	12280455	2019-07-26	2019-12-28	156	2019	12	28	7	57	52	37	1.5	Moving/feeding/foraging	No reaction
ADK01	175	315000	ADK_cam_18_117_718009_654986_20190726	12280455	2019-07-26	2019-12-28	156	2019	12	28	7	57	54	37	1.5	Moving/feeding/foraging	No reaction
ADK01	174	313200	ADK_cam_18_117_718009_654986_20190726	12280455	2019-07-25	2019-12-28	157	2019	12	28	7	57	56	37	1.5	Moving/feeding/foraging	No reaction
ADK02	174	313200	ADK_cam_18_71_724015_654985_20190725	10150071	2019-07-25	2019-10-15	83	2019	10	15	7	55	29	38	4.5	Moving/feeding/foraging	No reaction
ADK02	174	313200	ADK_cam_18_71_724015_654985_20190725	10150071	2019-07-25	2019-10-15	83	2019	10	15	7	55	31	38	9	Moving/feeding/foraging	No reaction
ADK02	174	313200	ADK_cam_18_71_724015_654985_20190725	11110122	2019-07-25	2019-11-11	110	2019	11	11	7	52	22	39	6.5	Moving/feeding/foraging	No reaction
ADK02	174	313200	ADK_cam_18_71_724015_654985_20190725	11110122	2019-07-25	2019-11-11	110	2019	11	11	7	52	24	39	6.5	Moving/feeding/foraging	No reaction
ADK02	174	313200	ADK_cam_18_71_724015_654985_20190725	11110122	2019-07-25	2019-11-11	110	2019	11	11	7	52	26	39	6.5	Moving/feeding/foraging	No reaction
ADK02	174	313200	ADK_cam_18_71_724015_654985_20190725	11110122	2019-07-25	2019-11-11	110	2019	11	11	7	52	28	39	6.5	Moving/feeding/foraging	No reaction
ADK02	174	313200	ADK_cam_18_71_724015_654985_20190725	11110122	2019-07-25	2019-11-11	110	2019	11	11	7	52	30	39	6.5	Moving/feeding/foraging	No reaction
ADK02	174	313200	ADK_cam_18_71_724015_654985_20190725	11110122	2019-07-25	2019-11-11	110	2019	11	11	7	52	32	39	6.5	Moving/feeding/foraging	No reaction
ADK02	174	313200	ADK_cam_18_71_724015_654985_20190725	11110122	2019-07-25	2019-11-11	110	2019	11	11	7	52	34	39	6.5	Moving/feeding/foraging	No reaction
ADK02	174	313200	ADK_cam_18_71_724015_654985_20190725	11110122	2019-07-25	2019-11-11	110	2019	11	11	7	52	36	39	6.5	Moving/feeding/foraging	No reaction
ADK02	174	313200	ADK_cam_18_71_724015_654985_20190725	11110122	2019-07-25	2019-11-11	110	2019	11	11	7	52	38	39	7.5	Moving/feeding/foraging	No reaction
ADK02	174	313200	ADK_cam_18_71_724015_654985_20190725	11110122	2019-07-25	2019-11-11	110	2019	11	11	7	52	40	39	7.5	Moving/feeding/foraging	No reaction
ADK02	174	313200	ADK_cam_18_71_724015_654985_20190725	11110122	2019-07-25	2019-11-11	110	2019	11	11	7	52	42	39	7.5	Moving/feeding/foraging	No reaction
ADK02	174	313200	ADK_cam_18_71_724015_654985_20190725	11110122	2019-07-25	2019-11-11	110	2019	11	11	7	52	26	40	2.5	Moving/feeding/foraging	No reaction
ADK02	174	313200	ADK_cam_18_71_724015_654985_20190725	11110122	2019-07-25	2019-11-11	110	2019	11	11	7	52	28	40	2.5	Moving/feeding/foraging	No reaction
ADK02	174	313200	ADK_cam_18_71_724015_654985_20190725	11110122	2019-07-25	2019-11-11	110	2019	11	11	7	52	30	40	2.5	Moving/feeding/foraging	No reaction
ADK02	174	313200	ADK_cam_18_71_724015_654985_20190725	11110122	2019-07-25	2019-11-11	110	2019	11	11	7	52	32	40	2.5	Moving/feeding/foraging	No reaction
ADK02	174	313200	ADK_cam_18_71_724015_654985_20190725	11110122	2019-07-25	2019-11-11	110	2019	11	11	7	52	34	40	2.5	Moving/feeding/foraging	No reaction
ADK02	174	313200	ADK_cam_18_71_724015_654985_20190725	11110122	2019-07-25	2019-11-11	110	2019	11	11	7	52	43	40	4.5	Moving/feeding/foraging	No reaction
ADK02	174	313200	ADK_cam_18_71_724015_654985_20190725	11110122	2019-07-25	2019-11-11	110	2019	11	11	7	52	45	40	4.5	Moving/feeding/foraging	No reaction
ADK02	174	313200	ADK_cam_18_71_724015_654985_20190725	11110123	2019-07-25	2019-11-11	110	2019	11	11	7	52	50	41	6.5	Moving/feeding/foraging	No reaction
ADK02	174	313200	ADK_cam_18_71_724015_654985_20190725	11110123	2019-07-25	2019-11-11	110	2019	11	11	7	52	52	41	6.5	Moving/feeding/foraging	No reaction
ADK02	174	313200	ADK_cam_18_71_724015_654985_20190725	11110123	2019-07-25	2019-11-11	110	2019	11	11	7	52	54	41	6.5	Moving/feeding/foraging	No reaction
ADK02	174	313200	ADK_cam_18_71_724015_654985_20190725	11110123	2019-07-25	2019-11-11	110	2019	11	11	7	52	56	41	6.5	Moving/feeding/foraging	No reaction
ADK02	174	313200	ADK_cam_18_71_724015_654985_20190725	11110123	2019-07-25	2019-11-11	110	2019	11	11	7	52	58	41	6.5	Moving/feeding/foraging	No reaction
ADK02	174	313200	ADK_cam_18_71_724015_654985_20190725	11110123	2019-07-25	2019-11-11	110	2019	11	11	7	53	0	41	6.5	Moving/feeding/foraging	No reaction
ADK02	174	313200	ADK_cam_18_71_724015_654985_20190725	11110123	2019-07-25	2019-11-11	110	2019	11	11	7	53	2	41	6.5	Moving/feeding/foraging	No reaction
ADK02	174	313200	ADK_cam_18_71_724015_654985_20190725	11110123	2019-07-25	2019-11-11	110	2019	11	11	7	53	4	41	6.5	Moving/feeding/foraging	No reaction
ADK02	174	313200	ADK_cam_18_71_724015_654985_20190725	11110123	2019-07-25	2019-11-11	110	2019	11	11	7	53	6	41	7.5	Moving/feeding/foraging	No reaction
ADK02	174	313200	ADK_cam_18_71_724015_654985_20190725	11110123	2019-07-25	2019-11-11	110	2019	11	11	7	53	8	41	7.5	Moving/feeding/foraging	No reaction
ADK02	174	313200	ADK_cam_18_71_724015_654985_20190725	11110123	2019-07-25	2019-11-11	110	2019	11	11	7	53	10	41	7.5	Moving/feeding/foraging	No reaction
ADK02	174	313200	ADK_cam_18_71_724015_654985_20190725	11110123	2019-07-25	2019-11-11	110	2019	11	11	7	53	12	41	7.5	Moving/feeding/foraging	No reaction
ADK02	174	313200	ADK_cam_18_71_724015_654985_20190725	11110123	2019-07-25	2019-11-11	110	2019	11	11	7	53	14	41	7.5	Moving/feeding/foraging	No reaction
ADK02	174	313200	ADK_cam_18_71_724015_654985_20190725	11110123	2019-07-25	2019-11-11	110	2019	11	11	7	53	16	41	7.5	Moving/feeding/foraging	No reaction
ADK02	174	313200	ADK_cam_18_71_724015_654985_20190725	11110123	2019-07-25	2019-11-11	110	2019	11	11	7	53	18	41	7.5	Moving/feeding/foraging	No reaction
ADK02	174	313200	ADK_cam_18_71_724015_654985_20190725	11110123	2019-07-25	2019-11-11	110	2019	11	11	7	53	20	41	7.5	Moving/feeding/foraging	No reaction
ADK02	174	313200	ADK_cam_18_71_724015_654985_20190725	11110123	2019-07-25	2019-11-11	110	2019	11	11	7	53	22	41	7.5	Moving/feeding/foraging	No reaction
ADK02	174	313200	ADK_cam_18_71_724015_654985_20190725	11110123	2019-07-25	2019-11-11	110	2019	11	11	7	53	24	41	7.5	Moving/feeding/foraging	No reaction
ADK02	174	313200	ADK_cam_18_71_724015_654985_20190725	11110123	2019-07-25	2019-11-11	110	2019	11	11	7	53	26	41	7.5	Moving/feeding/foraging	No reaction
ADK02	174	313200	ADK_cam_18_71_724015_654985_20190725	11110123	2019-07-25	2019-11-11	110	2019	11	11	7	53	28	41	7.5	Moving/feeding/foraging	No reaction
ADK02	174	313200	ADK_cam_18_71_724015_654985_20190725	11110123	2019-07-25	2019-11-11	110	2019	11	11	7	53	30	41	7.5	Moving/feeding/foraging	No reaction
ADK02	174	313200	ADK_cam_18_71_724015_654985_20190725	11110123	2019-07-25	2019-11-11	110	2019	11	11	7	53	32	41	7.5	Moving/feeding/foraging	No reaction
ADK02	174	313200	ADK_cam_18_71_724015_654985_20190725	11110123	2019-07-25	2019-11-11	110	2019	11	11	7	53	34	41	7.5	Moving/feeding/foraging	No reaction
ADK02	174	313200	ADK_cam_18_71_724015_654985_20190725	11110123	2019-07-25	2019-11-11	110	2019	11	11	7	53	36	41	7.5	Moving/feeding/foraging	No reaction
ADK02	174	313200	ADK_cam_18_71_724015_654985_20190725	11110123	2019-07-25	2019-11-11	110	2019	11	11	7	53	38	41	7.5	Moving/feeding/foraging	No reaction
ADK02	174	313200	ADK_cam_18_71_724015_654985_20190725	11110123	2019-07-25	2019-11-11	110	2019	11	11	7	53	40	41	6.5	Moving/feeding/foraging	No reaction
ADK02	174	313200	ADK_cam_18_71_724015_654985_20190725	11110123	2019-07-25	2019-11-11	110	2019	11	11	7	53	42	41	6.5	Moving/feeding/foraging	No reaction
ADK02	174	313200	ADK_cam_18_71_724015_654985_20190725	11110123	2019-07-25	2019-11-11	110	2019	11	11	7	53	44	41	5.5	Moving/feeding/foraging	No reaction
ADK02	174	313200	ADK_cam_18_71_724015_654985_20190725	11110123	2019-07-25	2019-11-11	110	2019	11	11	7	53	46	41	4.5	Moving/feeding/foraging	No reaction
ADK02	174	313200	ADK_cam_18_71_724015_654985_20190725	11110123	2019-07-25	2019-11-11	110	2019	11	11	7	53	48	41	4.5	Moving/feeding/foraging	No reaction
ADK02	174	313200	ADK_cam_18_71_724015_654985_20190725	12190218	2019-07-25	2019-11-19	118	2019	11	19	7	35	25	42	7.5	Moving/feeding/foraging	No reaction
ADK02	174	313200	ADK_cam_18_71_724015_654985_20190725	12190218	2019-07-25	2019-11-19	118	2019	11	19	7	35	25	44	6.5	Moving/feeding/foraging	No reaction
ADK02	174	313200	ADK_cam_18_71_724015_654985_20190725	12190218	2019-07-25	2019-11-19	118	2019	11	19	7	35	25	46	6.5	Moving/feeding/foraging	No reaction
ADK02	174	313200	ADK_cam_18_71_724015_654985_20190725	12190218	2019-07-25	2019-11-19	118	2019	11	19	7	35	25	48	5.5	Moving/feeding/foraging	No reaction
ADK02	174	313200	ADK_cam_18_71_724015_654985_20190725	12190219	2019-07-25	2019-11-19	118	2019	11	19	7	35	34	49	4.5	Moving/feeding/foraging	No reaction
ADK02	174	313200	ADK_cam_18_71_724015_654985_20190725	12190219	2019-07-25	2019-11-19	118	2019	11	19	7	35	36	49	4.5	Moving/feeding/foraging	No reaction
ADK02	174	313200	ADK_cam_18_71_724015_654985_20190725	12190219	2019-07-25	2019-11-19	118	2019	11	19	7	35	38	49	4.5	Moving/feeding/foraging	No reaction
ADK02	174	313200	ADK_cam_18_71_724015_654985_20190725	12190220	2019-07-25	2019-11-19	118	2019	11	19	7	35	52	50	4.5	Moving/feeding/foraging	No reaction
ADK02	174	313200	ADK_cam_18_71_724015_654985_20190725	12190220	2019-07-25	2019-11-19	118	2019	11	19	7	35	54	50	4.5	Moving/feeding/foraging	No reaction
ADK02	174	313200	ADK_cam_18_71_724015_654985_20190725	12190220	2019-07-25	2019-11-19	118	2019	11	19	7	35	52	51	1.5	Moving/feeding/foraging	No reaction
ADK02	174	313200	ADK_cam_18_71_724015_654985_20190725	12190221	2019-07-25	2019-11-19	118	2019	11	19	7	36	10	52	2.5	Moving/feeding/foraging	No reaction
ADK02	174	313200	ADK_cam_18_71_724015_654985_20190725	12190221	2019-07-25	2019-11-19	118	2019	11	19	7	36	12	52	1.5	Moving/feeding/foraging	No reaction
ADK02	174	313200	ADK_cam_18_71_724015_654985_20190725	12190222	2019-07-25	2019-11-19	118	2019	11	19	7	36	43	53	4.5	Moving/feeding/foraging	No reaction
ADK02	174	313200	ADK_cam_18_71_724015_654985_20190725	12190222	2019-07-25	2019-11-19	118	2019	11	19	7	36	45	53	4.5	Moving/feeding/foraging	No reaction
ADK02	174	313200	ADK_cam_18_71_724015_654985_20190725	12190222	2019-07-25	2019-11-19	118	2019	11	19	7	36	47	53	4.5	Moving/feeding/foraging	No reaction
ADK02	174	313200	ADK_cam_18_71_724015_654985_20190725	12190223	2019-07-25	2019-11-19	118	2019	11	19	7	36	51	54	3.5	Moving/feeding/foraging	No reaction
ADK02	174	313200	ADK_cam_18_71_724015_654985_20190725	12190223	2019-07-25	2019-11-19	118	2019	11	19	7	36	53	54	2.5	Moving/feeding/foraging	No reaction
ADK02	174	313200	ADK_cam_18_71_724015_654985_20190725	12190223	2019-07-25	2019-11-19	118	2019	11	19	7	36	55	54	1.5	Moving/feeding/foraging	No reaction
ADK02	174	313200	ADK_cam_18_71_724015_654985_20190725	12190224	2019-07-25	2019-11-19	118	2019	11	19	7	36	58	55	0.5	Moving/feeding/foraging	No reaction
ADK02	174	313200	ADK_cam_18_71_724015_654985_20190725	12240258	2019-07-25	2019-11-24	123	2019	11	24	7	9	38	56	2.5	Moving/feeding/foraging	No reaction
ADK02	174	313200	ADK_cam_18_71_724015_654985_20190725	12240259	2019-07-25	2019-11-24	123	2019	11	24	7	9	41	57	2.5	Moving/feeding/foraging	No reaction
ADK02	174	313200	ADK_cam_18_71_724015_654985_20190725	12240259	2019-07-25	2019-11-24	123	2019	11	24	7	9	43	57	1.5	Attraction/fixation	With reaction
ADK02	174	313200	ADK_cam_18_71_724015_654985_20190725	12240259	2019-07-25	2019-11-24	123	2019	11	24	7	9	45	57	1.5	Attraction/fixation	With reaction
ADK02	174	313200	ADK_cam_18_71_724015_654985_20190725	12240261	2019-07-25	2019-11-24	123	2019	11	24	7	16	7	58	4.5	Moving/feeding/foraging	No reaction
ADK02	174	313200	ADK_cam_18_71_724015_654985_20190725	12240261	2019-07-25	2019-11-24	123	2019	11	24	7	16	9	58	4.5	Moving/feeding/foraging	No reaction
ADK02	174	313200	ADK_cam_18_71_724015_654985_20190725	12240261	2019-07-25	2019-11-24	123	2019	11	24	7	16	11	58	4.5	Moving/feeding/foraging	No reaction
ADK02	174	313200	ADK_cam_18_71_724015_654985_20190725	12240262	2019-07-25	2019-11-24	123	2019	11	24	7	16	13	59	4.5	Moving/feeding/foraging	No reaction
ADK02	174	313200	ADK_cam_18_71_724015_654985_20190725	12240262	2019-07-25	2019-11-24	123	2019	11	24	7	16	15	59	4.5	Moving/feeding/foraging	No reaction
ADK02	174	313200	ADK_cam_18_71_724015_654985_20190725	12240262	2019-07-25	2019-11-24	123	2019	11	24	7	16	17	59	4.5	Moving/feeding/foraging	No reaction
ADK02	174	313200	ADK_cam_18_71_724015_654985_20190725	12240263	2019-07-25	2019-11-24	123	2019	11	24	7	16	22	60	4.5	Moving/feeding/foraging	No reaction
ADK02	174	313200	ADK_cam_18_71_724015_654985_20190725	12240264	2019-07-25	2019-11-24	123	2019	11	24	7	18	9	61	7.5	Moving/feeding/foraging	No reaction
ADK02	174	313200	ADK_cam_18_71_724015_654985_20190725	12240264	2019-07-25	2019-11-24	123	2019	11	24	7	18	11	61	7.5	Moving/feeding/foraging	No reaction
ADK02	174	313200	ADK_cam_18_71_724015_654985_20190725	12240264	2019-07-25	2019-11-24	123	2019	11	24	7	18	13	61	7.5	Moving/feeding/foraging	No reaction
ADK02	174	313200	ADK_cam_18_71_724015_654985_20190725	1070317	2019-07-25	2020-01-07	167	2020	1	7	7	54	20	62	7.5	Moving/feeding/foraging	No reaction
ADK02	174	313200	ADK_cam_18_71_724015_654985_20190725	1070317	2019-07-25	2020-01-07	167	2020	1	7	7	54	22	62	7.5	Moving/feeding/foraging	No reaction
ADK02	174	313200	ADK_cam_18_71_724015_654985_20190725	1070317	2019-07-25	2020-01-07	167	2020	1	7	7	54	24	62	7.5	Moving/feeding/foraging	No reaction
ADK02	174	313200	ADK_cam_18_71_724015_654985_20190725	1070317	2019-07-25	2020-01-07	167	2020	1	7	7	54	20	63	9	Moving/feeding/foraging	No reaction
ADK02	174	313200	ADK_cam_18_71_724015_654985_20190725	1070317	2019-07-25	2020-01-07	167	2020	1	7	7	54	22	63	9	Moving/feeding/foraging	No reaction
ADK02	174	313200	ADK_cam_18_71_724015_654985_20190725	1070317	2019-07-25	2020-01-07	167	2020	1	7	7	54	24	63	9	Moving/feeding/foraging	No reaction
ADK02	174	313200	ADK_cam_18_71_724015_654985_20190725	1070318	2019-07-25	2020-01-07	167	2020	1	7	7	54	30	64	7.5	Moving/feeding/foraging	No reaction
ADK02	174	313200	ADK_cam_18_71_724015_654985_20190725	1070318	2019-07-25	2020-01-07	167	2020	1	7	7	54	32	64	7.5	Moving/feeding/foraging	No reaction
ADK02	174	313200	ADK_cam_18_71_724015_654985_20190725	1070318	2019-07-25	2020-01-07	167	2020	1	7	7	54	34	64	7.5	Moving/feeding/foraging	No reaction
ADK02	174	313200	ADK_cam_18_71_724015_654985_20190725	1070319	2019-07-25	2020-01-07	167	2020	1	7	7	54	43	65	7.5	Moving/feeding/foraging	No reaction
ADK02	174	313200	ADK_cam_18_71_724015_654985_20190725	1070319	2019-07-25	2020-01-07	167	2020	1	7	7	54	45	65	7.5	Moving/feeding/foraging	No reaction
ADK02	174	313200	ADK_cam_18_71_724015_654985_20190725	1070319	2019-07-25	2020-01-07	167	2020	1	7	7	54	47	65	7.5	Moving/feeding/foraging	No reaction
ADK02	174	313200	ADK_cam_18_71_724015_654985_20190725	1070320	2019-07-25	2020-01-07	167	2020	1	7	7	55	59	66	9	Moving/feeding/foraging	No reaction
ADK02	174	313200	ADK_cam_18_71_724015_654985_20190725	1070320	2019-07-25	2020-01-07	167	2020	1	7	7	56	1	66	9	Moving/feeding/foraging	No reaction
ADK03	174	313200	ADK_cam_18_107_729966_654991_20190724	11100179	2019-07-24	2019-11-10	110	2019	11	10	7	29	3	67	2.5	Moving/feeding/foraging	No reaction
ADK03	174	313200	ADK_cam_18_107_729966_654991_20190724	11100179	2019-07-24	2019-11-10	110	2019	11	10	7	29	5	67	2.5	Moving/feeding/foraging	No reaction
ADK03	174	313200	ADK_cam_18_107_729966_654991_20190724	11100179	2019-07-24	2019-11-10	110	2019	11	10	7	29	7	67	2.5	Moving/feeding/foraging	No reaction
ADK03	174	313200	ADK_cam_18_107_729966_654991_20190724	11100180	2019-07-24	2019-11-10	110	2019	11	10	7	29	14	68	2.5	Moving/feeding/foraging	No reaction
ADK03	174	313200	ADK_cam_18_107_729966_654991_20190724	11100180	2019-07-24	2019-11-10	110	2019	11	10	7	29	16	68	2.5	Moving/feeding/foraging	No reaction
ADK03	174	313200	ADK_cam_18_107_729966_654991_20190724	11100180	2019-07-24	2019-11-10	110	2019	11	10	7	29	18	68	2.5	Moving/feeding/foraging	No reaction
ADK03	174	313200	ADK_cam_18_107_729966_654991_20190724	11180218	2019-07-24	2019-11-18	118	2019	11	18	7	8	45	69	7.5	Moving/feeding/foraging	No reaction
ADK03	174	313200	ADK_cam_18_107_729966_654991_20190724	11180218	2019-07-24	2019-11-18	118	2019	11	18	7	8	47	69	7.5	Moving/feeding/foraging	No reaction
ADK03	174	313200	ADK_cam_18_107_729966_654991_20190724	11270289	2019-07-24	2019-11-27	127	2019	11	27	7	48	7	70	6.5	Moving/feeding/foraging	No reaction
ADK03	174	313200	ADK_cam_18_107_729966_654991_20190724	11270289	2019-07-24	2019-11-27	127	2019	11	27	7	48	9	70	6.5	Moving/feeding/foraging	No reaction
ADK03	174	313200	ADK_cam_18_107_729966_654991_20190724	11270289	2019-07-24	2019-11-27	127	2019	11	27	7	48	11	70	6.5	Moving/feeding/foraging	No reaction
ADK03	174	313200	ADK_cam_18_107_729966_654991_20190724	12110350	2019-07-24	2019-12-11	141	2019	12	11	7	11	55	71	7.5	Moving/feeding/foraging	No reaction
ADK03	174	313200	ADK_cam_18_107_729966_654991_20190724	12110350	2019-07-24	2019-12-11	141	2019	12	11	7	11	57	71	7.5	Moving/feeding/foraging	No reaction
ADK03	174	313200	ADK_cam_18_107_729966_654991_20190724	12110350	2019-07-24	2019-12-11	141	2019	12	11	7	11	59	71	7.5	Moving/feeding/foraging	No reaction
ADK03	174	313200	ADK_cam_18_107_729966_654991_20190724	12200383	2019-07-24	2019-12-20	150	2019	12	20	7	18	28	72	2.5	Moving/feeding/foraging	No reaction
ADK03	174	313200	ADK_cam_18_107_729966_654991_20190724	12200383	2019-07-24	2019-12-20	150	2019	12	20	7	18	30	72	2.5	Moving/feeding/foraging	No reaction
ADK03	174	313200	ADK_cam_18_107_729966_654991_20190724	12200383	2019-07-24	2019-12-20	150	2019	12	20	7	18	32	72	3.5	Moving/feeding/foraging	No reaction
ADK03	174	313200	ADK_cam_18_107_729966_654991_20190724	12200384	2019-07-24	2019-12-20	150	2019	12	20	7	19	35	73	4.5	Moving/feeding/foraging	No reaction
ADK03	174	313200	ADK_cam_18_107_729966_654991_20190724	12200384	2019-07-24	2019-12-20	150	2019	12	20	7	19	37	73	4.5	Moving/feeding/foraging	No reaction
ADK03	174	313200	ADK_cam_18_107_729966_654991_20190724	12200384	2019-07-24	2019-12-20	150	2019	12	20	7	19	39	73	5.5	Moving/feeding/foraging	No reaction
ADK03	174	313200	ADK_cam_18_107_729966_654991_20190724	12300450	2019-07-24	2019-12-30	160	2019	12	30	7	53	36	74	5.5	Moving/feeding/foraging	No reaction
ADK03	174	313200	ADK_cam_18_107_729966_654991_20190724	12300450	2019-07-24	2019-12-30	160	2019	12	30	7	53	38	74	5.5	Moving/feeding/foraging	No reaction
ADK03	174	313200	ADK_cam_18_107_729966_654991_20190724	12300450	2019-07-24	2019-12-30	160	2019	12	30	7	53	40	74	5.5	Moving/feeding/foraging	No reaction
ADK03	174	313200	ADK_cam_18_107_729966_654991_20190724	12300451	2019-07-24	2019-12-30	160	2019	12	30	7	53	44	75	5.5	Moving/feeding/foraging	No reaction
ADK03	174	313200	ADK_cam_18_107_729966_654991_20190724	12300451	2019-07-24	2019-12-30	160	2019	12	30	7	53	46	75	5.5	Moving/feeding/foraging	No reaction
ADK03	174	313200	ADK_cam_18_107_729966_654991_20190724	12300451	2019-07-24	2019-12-30	160	2019	12	30	7	53	48	76	4.5	Moving/feeding/foraging	No reaction
ADK03	174	313200	ADK_cam_18_107_729966_654991_20190724	12300452	2019-07-24	2019-12-30	160	2019	12	30	7	53	51	77	3.5	Moving/feeding/foraging	No reaction
ADK03	174	313200	ADK_cam_18_107_729966_654991_20190724	12300452	2019-07-24	2019-12-30	160	2019	12	30	7	53	53	77	3.5	Moving/feeding/foraging	No reaction
ADK03	174	313200	ADK_cam_18_107_729966_654991_20190724	12310457	2019-07-24	2019-12-31	161	2019	12	31	7	3	5	78	7.5	Moving/feeding/foraging	No reaction
ADK03	174	313200	ADK_cam_18_107_729966_654991_20190724	12310457	2019-07-24	2019-12-31	161	2019	12	31	7	3	7	78	7.5	Moving/feeding/foraging	No reaction
ADK03	174	313200	ADK_cam_18_107_729966_654991_20190724	1010464	2019-07-24	2020-01-01	162	2020	1	1	7	48	46	79	5.5	Moving/feeding/foraging	No reaction
ADK03	174	313200	ADK_cam_18_107_729966_654991_20190724	1010464	2019-07-24	2020-01-01	162	2020	1	1	7	48	48	79	5.5	Moving/feeding/foraging	No reaction
ADK03	174	313200	ADK_cam_18_107_729966_654991_20190724	1010464	2019-07-24	2020-01-01	162	2020	1	1	7	48	50	79	4.5	Moving/feeding/foraging	No reaction
ADK03	174	313200	ADK_cam_18_107_729966_654991_20190724	1010464	2019-07-24	2020-01-01	162	2020	1	1	7	48	46	80	7.5	Moving/feeding/foraging	No reaction
ADK03	174	313200	ADK_cam_18_107_729966_654991_20190724	1010464	2019-07-24	2020-01-01	162	2020	1	1	7	48	48	80	7.5	Moving/feeding/foraging	No reaction
ADK03	174	313200	ADK_cam_18_107_729966_654991_20190724	1010464	2019-07-24	2020-01-01	162	2020	1	1	7	48	50	80	7.5	Moving/feeding/foraging	No reaction
ADK03	174	313200	ADK_cam_18_107_729966_654991_20190724	1010465	2019-07-24	2020-01-01	162	2020	1	1	7	48	53	81	4.5	Moving/feeding/foraging	No reaction
ADK03	174	313200	ADK_cam_18_107_729966_654991_20190724	1010465	2019-07-24	2020-01-01	162	2020	1	1	7	48	55	81	4.5	Moving/feeding/foraging	No reaction
ADK03	174	313200	ADK_cam_18_107_729966_654991_20190724	1010465	2019-07-24	2020-01-01	162	2020	1	1	7	48	57	81	4.5	Moving/feeding/foraging	No reaction
ADK03	174	313200	ADK_cam_18_107_729966_654991_20190724	1010465	2019-07-24	2020-01-01	162	2020	1	1	7	48	53	82	9	Moving/feeding/foraging	No reaction
ADK03	174	313200	ADK_cam_18_107_729966_654991_20190724	1010465	2019-07-24	2020-01-01	162	2020	1	1	7	48	55	82	9	Moving/feeding/foraging	No reaction
ADK03	174	313200	ADK_cam_18_107_729966_654991_20190724	1010465	2019-07-24	2020-01-01	162	2020	1	1	7	48	57	82	9	Moving/feeding/foraging	No reaction
ADK03	174	313200	ADK_cam_18_107_729966_654991_20190724	1010465	2019-07-24	2020-01-01	162	2020	1	1	7	48	53	83	9	Moving/feeding/foraging	No reaction
ADK03	174	313200	ADK_cam_18_107_729966_654991_20190724	1010465	2019-07-24	2020-01-01	162	2020	1	1	7	48	55	83	9	Moving/feeding/foraging	No reaction
ADK03	174	313200	ADK_cam_18_107_729966_654991_20190724	1010465	2019-07-24	2020-01-01	162	2020	1	1	7	48	57	83	9	Moving/feeding/foraging	No reaction
ADK03	174	313200	ADK_cam_18_107_729966_654991_20190724	1010466	2019-07-24	2020-01-01	162	2020	1	1	7	49	8	84	9	Moving/feeding/foraging	No reaction
ADK03	174	313200	ADK_cam_18_107_729966_654991_20190724	1010466	2019-07-24	2020-01-01	162	2020	1	1	7	49	10	84	9	Moving/feeding/foraging	No reaction
ADK03	174	313200	ADK_cam_18_107_729966_654991_20190724	1010466	2019-07-24	2020-01-01	162	2020	1	1	7	49	12	84	9	Moving/feeding/foraging	No reaction
ADK03	174	313200	ADK_cam_18_107_729966_654991_20190724	1010466	2019-07-24	2020-01-01	162	2020	1	1	7	49	8	85	4.5	Moving/feeding/foraging	No reaction
ADK03	174	313200	ADK_cam_18_107_729966_654991_20190724	1010466	2019-07-24	2020-01-01	162	2020	1	1	7	49	10	85	3.5	Moving/feeding/foraging	No reaction
ADK03	174	313200	ADK_cam_18_107_729966_654991_20190724	1010466	2019-07-24	2020-01-01	162	2020	1	1	7	49	12	85	3.5	Moving/feeding/foraging	No reaction
ADK03	174	313200	ADK_cam_18_107_729966_654991_20190724	1010467	2019-07-24	2020-01-01	162	2020	1	1	7	49	21	86	9	Moving/feeding/foraging	No reaction
ADK03	174	313200	ADK_cam_18_107_729966_654991_20190724	1010467	2019-07-24	2020-01-01	162	2020	1	1	7	49	23	86	9	Moving/feeding/foraging	No reaction
ADK03	174	313200	ADK_cam_18_107_729966_654991_20190724	1010467	2019-07-24	2020-01-01	162	2020	1	1	7	49	25	86	9	Moving/feeding/foraging	No reaction
ADK03	174	313200	ADK_cam_18_107_729966_654991_20190724	1010468	2019-07-24	2020-01-01	162	2020	1	1	7	49	30	87	7.5	Moving/feeding/foraging	No reaction
ADK03	174	313200	ADK_cam_18_107_729966_654991_20190724	1010468	2019-07-24	2020-01-01	162	2020	1	1	7	49	32	87	7.5	Moving/feeding/foraging	No reaction
ADK03	174	313200	ADK_cam_18_107_729966_654991_20190724	1010468	2019-07-24	2020-01-01	162	2020	1	1	7	49	34	87	7.5	Moving/feeding/foraging	No reaction
ADK03	174	313200	ADK_cam_18_107_729966_654991_20190724	1010469	2019-07-24	2020-01-01	162	2020	1	1	7	49	58	88	4.5	Moving/feeding/foraging	No reaction
ADK03	174	313200	ADK_cam_18_107_729966_654991_20190724	1010469	2019-07-24	2020-01-01	162	2020	1	1	7	50	0	88	4.5	Moving/feeding/foraging	No reaction
ADK03	174	313200	ADK_cam_18_107_729966_654991_20190724	1010469	2019-07-24	2020-01-01	162	2020	1	1	7	50	2	88	4.5	Moving/feeding/foraging	No reaction
ADK03	174	313200	ADK_cam_18_107_729966_654991_20190724	1010470	2019-07-24	2020-01-01	162	2020	1	1	7	50	12	89	9	Moving/feeding/foraging	No reaction
ADK03	174	313200	ADK_cam_18_107_729966_654991_20190724	1010470	2019-07-24	2020-01-01	162	2020	1	1	7	50	14	89	9	Moving/feeding/foraging	No reaction
ADK03	174	313200	ADK_cam_18_107_729966_654991_20190724	1010470	2019-07-24	2020-01-01	162	2020	1	1	7	50	16	89	9	Moving/feeding/foraging	No reaction
ADK03	174	313200	ADK_cam_18_107_729966_654991_20190724	1020474	2019-07-24	2020-01-02	163	2020	1	2	7	59	16	90	7.5	Moving/feeding/foraging	No reaction
ADK03	174	313200	ADK_cam_18_107_729966_654991_20190724	1020474	2019-07-24	2020-01-02	163	2020	1	2	7	59	18	90	7.5	Moving/feeding/foraging	No reaction
ADK03	174	313200	ADK_cam_18_107_729966_654991_20190724	1020474	2019-07-24	2020-01-02	163	2020	1	2	7	59	20	90	7.5	Moving/feeding/foraging	No reaction
ADK03	174	313200	ADK_cam_18_107_729966_654991_20190724	1020474	2019-07-24	2020-01-02	163	2020	1	2	7	59	16	91	6.5	Moving/feeding/foraging	No reaction
ADK03	174	313200	ADK_cam_18_107_729966_654991_20190724	1020474	2019-07-24	2020-01-02	163	2020	1	2	7	59	18	91	6.5	Moving/feeding/foraging	No reaction
ADK03	174	313200	ADK_cam_18_107_729966_654991_20190724	1020474	2019-07-24	2020-01-02	163	2020	1	2	7	59	20	91	6.5	Moving/feeding/foraging	No reaction
ADK03	174	313200	ADK_cam_18_107_729966_654991_20190724	1020475	2019-07-24	2020-01-02	163	2020	1	2	7	59	24	92	6.5	Moving/feeding/foraging	No reaction
ADK03	174	313200	ADK_cam_18_107_729966_654991_20190724	1020475	2019-07-24	2020-01-02	163	2020	1	2	7	59	26	92	6.5	Moving/feeding/foraging	No reaction
ADK03	174	313200	ADK_cam_18_107_729966_654991_20190724	1020475	2019-07-24	2020-01-02	163	2020	1	2	7	59	28	92	6.5	Moving/feeding/foraging	No reaction
ADK03	174	313200	ADK_cam_18_107_729966_654991_20190724	1020475	2019-07-24	2020-01-02	163	2020	1	2	7	59	24	93	6.5	Moving/feeding/foraging	No reaction
ADK03	66	118800	ADK_cam_18_107_729966_654991_20190724	1020475	2019-07-24	2020-01-02	163	2020	1	2	7	59	26	93	6.5	Moving/feeding/foraging	No reaction
ADK03	66	118800	ADK_cam_18_107_729966_654991_20190724	1020475	2019-07-24	2020-01-02	163	2020	1	2	7	59	28	93	6.5	Moving/feeding/foraging	No reaction
ADK04	66	118800	NA	NA	2019-12-01	#VALUE!	#VALUE!	NA	NA	NA	NA	NA	NA	NA
ADK05	66	118800	ADK_cam_18_96_709024_657989_20191130	12020012	2019-11-30	2019-12-02	3	2019	12	2	7	58	57	94	1.5	Moving/feeding/foraging	No reaction
ADK05	66	118800	ADK_cam_18_96_709024_657989_20191130	12020012	2019-11-30	2019-12-02	3	2019	12	2	7	58	59	94	1.5	Moving/feeding/foraging	No reaction
ADK05	66	118800	ADK_cam_18_96_709024_657989_20191130	12020012	2019-11-30	2019-12-02	3	2019	12	2	7	59	1	94	1.5	Moving/feeding/foraging	No reaction
ADK05	66	118800	ADK_cam_18_96_709024_657989_20191130	12020012	2019-11-30	2019-12-02	3	2019	12	2	7	59	3	94	1.5	Moving/feeding/foraging	No reaction
ADK05	66	118800	ADK_cam_18_96_709024_657989_20191130	12020012	2019-11-30	2019-12-02	3	2019	12	2	7	59	5	94	2.5	Moving/feeding/foraging	No reaction
ADK05	66	118800	ADK_cam_18_96_709024_657989_20191130	12020012	2019-11-30	2019-12-02	3	2019	12	2	7	59	7	94	2.5	Moving/feeding/foraging	No reaction
ADK05	66	118800	ADK_cam_18_96_709024_657989_20191130	12020012	2019-11-30	2019-12-02	3	2019	12	2	7	59	9	94	2.5	Moving/feeding/foraging	No reaction
ADK05	66	118800	ADK_cam_18_96_709024_657989_20191130	12070024	2019-11-30	2019-12-07	8	2019	12	7	7	16	56	95	2.5	Moving/feeding/foraging	No reaction
ADK05	66	118800	ADK_cam_18_96_709024_657989_20191130	12070024	2019-11-30	2019-12-07	8	2019	12	7	7	16	58	95	2.5	Moving/feeding/foraging	No reaction
ADK05	66	118800	ADK_cam_18_96_709024_657989_20191130	12070024	2019-11-30	2019-12-07	8	2019	12	7	7	17	0	95	2.5	Moving/feeding/foraging	No reaction
ADK05	66	118800	ADK_cam_18_96_709024_657989_20191130	12070024	2019-11-30	2019-12-07	8	2019	12	7	7	17	2	95	2.5	Moving/feeding/foraging	No reaction
ADK05	66	118800	ADK_cam_18_96_709024_657989_20191130	12070024	2019-11-30	2019-12-07	8	2019	12	7	7	17	13	96	2.5	Moving/feeding/foraging	No reaction
ADK05	66	118800	ADK_cam_18_96_709024_657989_20191130	12070024	2019-11-30	2019-12-07	8	2019	12	7	7	17	15	96	2.5	Moving/feeding/foraging	No reaction
ADK05	66	118800	ADK_cam_18_96_709024_657989_20191130	12070024	2019-11-30	2019-12-07	8	2019	12	7	7	17	17	96	2.5	Moving/feeding/foraging	No reaction
ADK05	66	118800	ADK_cam_18_96_709024_657989_20191130	12070024	2019-11-30	2019-12-07	8	2019	12	7	7	17	19	96	2.5	Moving/feeding/foraging	No reaction
ADK05	66	118800	ADK_cam_18_96_709024_657989_20191130	12070024	2019-11-30	2019-12-07	8	2019	12	7	7	17	21	96	2.5	Moving/feeding/foraging	No reaction
ADK05	66	118800	ADK_cam_18_96_709024_657989_20191130	12070024	2019-11-30	2019-12-07	8	2019	12	7	7	17	37	97	2.5	Moving/feeding/foraging	No reaction
ADK05	66	118800	ADK_cam_18_96_709024_657989_20191130	12070024	2019-11-30	2019-12-07	8	2019	12	7	7	17	39	97	2.5	Moving/feeding/foraging	No reaction
ADK05	66	118800	ADK_cam_18_96_709024_657989_20191130	12070024	2019-11-30	2019-12-07	8	2019	12	7	7	17	41	97	2.5	Moving/feeding/foraging	No reaction
ADK05	66	118800	ADK_cam_18_96_709024_657989_20191130	12070024	2019-11-30	2019-12-07	8	2019	12	7	7	17	43	97	1.5	Moving/feeding/foraging	No reaction
ADK05	66	118800	ADK_cam_18_96_709024_657989_20191130	12070024	2019-11-30	2019-12-07	8	2019	12	7	7	17	45	97	1.5	Moving/feeding/foraging	No reaction
ADK05	66	118800	ADK_cam_18_96_709024_657989_20191130	12170050	2019-11-30	2019-12-17	18	2019	12	17	7	48	24	98	0.5	Moving/feeding/foraging	No reaction
ADK05	66	118800	ADK_cam_18_96_709024_657989_20191130	12250070	2019-11-30	2019-12-25	26	2019	12	25	7	25	6	99	2.5	Moving/feeding/foraging	No reaction
ADK05	66	118800	ADK_cam_18_96_709024_657989_20191130	12250070	2019-11-30	2019-12-25	26	2019	12	25	7	25	8	99	2.5	Moving/feeding/foraging	No reaction
ADK05	66	118800	ADK_cam_18_96_709024_657989_20191130	12250070	2019-11-30	2019-12-25	26	2019	12	25	7	25	10	99	2.5	Moving/feeding/foraging	No reaction
ADK05	66	118800	ADK_cam_18_96_709024_657989_20191130	12250070	2019-11-30	2019-12-25	26	2019	12	25	7	25	12	99	2.5	Moving/feeding/foraging	No reaction
ADK05	66	118800	ADK_cam_18_96_709024_657989_20191130	12260072	2019-11-30	2019-12-26	27	2019	12	26	7	25	50	100	2.5	Moving/feeding/foraging	No reaction
ADK05	66	118800	ADK_cam_18_96_709024_657989_20191130	12260072	2019-11-30	2019-12-26	27	2019	12	26	7	25	52	100	2.5	Moving/feeding/foraging	No reaction
ADK05	66	118800	ADK_cam_18_96_709024_657989_20191130	12260072	2019-11-30	2019-12-26	27	2019	12	26	7	25	55	101	7.5	Moving/feeding/foraging	No reaction
ADK05	66	118800	ADK_cam_18_96_709024_657989_20191130	12260072	2019-11-30	2019-12-26	27	2019	12	26	7	25	57	101	7.5	Moving/feeding/foraging	No reaction
ADK05	66	118800	ADK_cam_18_96_709024_657989_20191130	12260072	2019-11-30	2019-12-26	27	2019	12	26	7	25	59	101	7.5	Moving/feeding/foraging	No reaction
ADK05	66	118800	ADK_cam_18_96_709024_657989_20191130	12260072	2019-11-30	2019-12-26	27	2019	12	26	7	26	1	101	6.5	Moving/feeding/foraging	No reaction
ADK05	66	118800	ADK_cam_18_96_709024_657989_20191130	12260072	2019-11-30	2019-12-26	27	2019	12	26	7	26	3	101	6.5	Moving/feeding/foraging	No reaction
ADK05	66	118800	ADK_cam_18_96_709024_657989_20191130	12260072	2019-11-30	2019-12-26	27	2019	12	26	7	26	5	101	6.5	Moving/feeding/foraging	No reaction
ADK05	66	118800	ADK_cam_18_96_709024_657989_20191130	1020081	2019-11-30	2020-01-02	34	2020	1	2	7	20	10	102	2.5	Moving/feeding/foraging	No reaction
ADK05	66	118800	ADK_cam_18_96_709024_657989_20191130	1020081	2019-11-30	2020-01-02	34	2020	1	2	7	20	12	102	2.5	Moving/feeding/foraging	No reaction
ADK05	66	118800	ADK_cam_18_96_709024_657989_20191130	1280583	2019-11-30	2020-01-28	60	2020	1	28	7	42	27	103	2.5	Moving/feeding/foraging	No reaction
ADK05	66	118800	ADK_cam_18_96_709024_657989_20191130	1280583	2019-11-30	2020-01-28	60	2020	1	28	7	42	29	103	1.5	Moving/feeding/foraging	No reaction
ADK05	175	315000	ADK_cam_18_96_709024_657989_20191130	1280583	2019-11-30	2020-01-28	60	2020	1	28	7	42	31	103	1.5	Moving/feeding/foraging	No reaction
ADK05	175	315000	ADK_cam_18_96_709024_657989_20191130	1280584	2019-11-30	2020-01-28	60	2020	1	28	7	42	34	104	1.5	Moving/feeding/foraging	No reaction
ADK05	175	315000	ADK_cam_18_96_709024_657989_20191130	1280584	2019-11-30	2020-01-28	60	2020	1	28	7	42	36	104	0.5	Moving/feeding/foraging	No reaction
ADK06	175	315000	ADK_cam_18_93_714981_657983_20190726	11120132	2019-07-26	2019-11-12	110	2019	11	12	7	46	45	105	2.5	Moving/feeding/foraging	No reaction
ADK06	175	315000	ADK_cam_18_93_714981_657983_20190726	12040176	2019-07-26	2019-12-04	132	2019	12	4	7	56	49	106	7.5	Moving/feeding/foraging	No reaction
ADK06	175	315000	ADK_cam_18_93_714981_657983_20190726	12040176	2019-07-26	2019-12-04	132	2019	12	4	7	56	51	106	7.5	Moving/feeding/foraging	No reaction
ADK06	175	315000	ADK_cam_18_93_714981_657983_20190726	12040176	2019-07-26	2019-12-04	132	2019	12	4	7	56	53	106	7.5	Moving/feeding/foraging	No reaction
ADK06	175	315000	ADK_cam_18_93_714981_657983_20190726	12040176	2019-07-26	2019-12-04	132	2019	12	4	7	56	55	106	7.5	Moving/feeding/foraging	No reaction
ADK06	175	315000	ADK_cam_18_93_714981_657983_20190726	12040176	2019-07-26	2019-12-04	132	2019	12	4	7	56	49	107	2.5	Moving/feeding/foraging	No reaction
ADK06	175	315000	ADK_cam_18_93_714981_657983_20190726	12040176	2019-07-26	2019-12-04	132	2019	12	4	7	56	51	107	2.5	Moving/feeding/foraging	No reaction
ADK06	175	315000	ADK_cam_18_93_714981_657983_20190726	12040176	2019-07-26	2019-12-04	132	2019	12	4	7	56	53	107	2.5	Moving/feeding/foraging	No reaction
ADK06	175	315000	ADK_cam_18_93_714981_657983_20190726	12040177	2019-07-26	2019-12-04	132	2019	12	4	7	56	58	108	7.5	Moving/feeding/foraging	No reaction
ADK06	175	315000	ADK_cam_18_93_714981_657983_20190726	12040177	2019-07-26	2019-12-04	132	2019	12	4	7	57	0	108	7.5	Moving/feeding/foraging	No reaction
ADK06	175	315000	ADK_cam_18_93_714981_657983_20190726	12050178	2019-07-26	2019-12-05	133	2019	12	5	7	38	19	109	2.5	Moving/feeding/foraging	No reaction
ADK06	175	315000	ADK_cam_18_93_714981_657983_20190726	12050178	2019-07-26	2019-12-05	133	2019	12	5	7	38	21	109	2.5	Moving/feeding/foraging	No reaction
ADK06	175	315000	ADK_cam_18_93_714981_657983_20190726	12050179	2019-07-26	2019-12-05	133	2019	12	5	7	38	24	110	2.5	Moving/feeding/foraging	No reaction
ADK06	175	315000	ADK_cam_18_93_714981_657983_20190726	12050179	2019-07-26	2019-12-05	133	2019	12	5	7	38	26	110	2.5	Moving/feeding/foraging	No reaction
ADK06	175	315000	ADK_cam_18_93_714981_657983_20190726	12050179	2019-07-26	2019-12-05	133	2019	12	5	7	38	28	110	3.5	Moving/feeding/foraging	No reaction
ADK06	175	315000	ADK_cam_18_93_714981_657983_20190726	12050180	2019-07-26	2019-12-05	133	2019	12	5	7	38	31	111	3.5	Moving/feeding/foraging	No reaction
ADK06	175	315000	ADK_cam_18_93_714981_657983_20190726	12050180	2019-07-26	2019-12-05	133	2019	12	5	7	38	33	111	4.5	Moving/feeding/foraging	No reaction
ADK06	175	315000	ADK_cam_18_93_714981_657983_20190726	12050180	2019-07-26	2019-12-05	133	2019	12	5	7	38	35	111	5.5	Moving/feeding/foraging	No reaction
ADK06	175	315000	ADK_cam_18_93_714981_657983_20190726	12050181	2019-07-26	2019-12-05	133	2019	12	5	7	44	15	112	3.5	Moving/feeding/foraging	No reaction
ADK06	175	315000	ADK_cam_18_93_714981_657983_20190726	12050181	2019-07-26	2019-12-05	133	2019	12	5	7	44	17	112	3.5	Moving/feeding/foraging	No reaction
ADK06	175	315000	ADK_cam_18_93_714981_657983_20190726	12050181	2019-07-26	2019-12-05	133	2019	12	5	7	44	19	112	3.5	Moving/feeding/foraging	No reaction
ADK06	175	315000	ADK_cam_18_93_714981_657983_20190726	12050181	2019-07-26	2019-12-05	133	2019	12	5	7	44	21	112	3.5	Moving/feeding/foraging	No reaction
ADK06	175	315000	ADK_cam_18_93_714981_657983_20190726	12050182	2019-07-26	2019-12-05	133	2019	12	5	7	44	23	113	2.5	Moving/feeding/foraging	No reaction
ADK06	175	315000	ADK_cam_18_93_714981_657983_20190726	12080196	2019-07-26	2019-12-08	136	2019	12	8	7	29	26	114	2.5	Moving/feeding/foraging	No reaction
ADK06	175	315000	ADK_cam_18_93_714981_657983_20190726	12080196	2019-07-26	2019-12-08	136	2019	12	8	7	29	28	114	2.5	Moving/feeding/foraging	No reaction
ADK06	175	315000	ADK_cam_18_93_714981_657983_20190726	12080196	2019-07-26	2019-12-08	136	2019	12	8	7	29	30	114	2.5	Moving/feeding/foraging	No reaction
ADK06	175	315000	ADK_cam_18_93_714981_657983_20190726	12080196	2019-07-26	2019-12-08	136	2019	12	8	7	29	26	115	11	Moving/feeding/foraging	No reaction
ADK06	175	315000	ADK_cam_18_93_714981_657983_20190726	12080196	2019-07-26	2019-12-08	136	2019	12	8	7	29	28	115	11	Moving/feeding/foraging	No reaction
ADK06	175	315000	ADK_cam_18_93_714981_657983_20190726	12080196	2019-07-26	2019-12-08	136	2019	12	8	7	29	30	115	11	Moving/feeding/foraging	No reaction
ADK06	175	315000	ADK_cam_18_93_714981_657983_20190726	12080197	2019-07-26	2019-12-08	136	2019	12	8	7	29	34	116	2.5	Moving/feeding/foraging	No reaction
ADK06	175	315000	ADK_cam_18_93_714981_657983_20190726	12090199	2019-07-26	2019-12-09	137	2019	12	9	7	37	48	117	2.5	Moving/feeding/foraging	No reaction
ADK06	175	315000	ADK_cam_18_93_714981_657983_20190726	12090199	2019-07-26	2019-12-09	137	2019	12	9	7	37	50	117	2.5	Moving/feeding/foraging	No reaction
ADK06	175	315000	ADK_cam_18_93_714981_657983_20190726	12090199	2019-07-26	2019-12-09	137	2019	12	9	7	37	50	118	7.5	Moving/feeding/foraging	No reaction
ADK06	175	315000	ADK_cam_18_93_714981_657983_20190726	12090199	2019-07-26	2019-12-09	137	2019	12	9	7	37	52	118	6.5	Moving/feeding/foraging	No reaction
ADK06	175	315000	ADK_cam_18_93_714981_657983_20190726	12090200	2019-07-26	2019-12-09	137	2019	12	9	7	38	5	119	5.5	Moving/feeding/foraging	No reaction
ADK06	175	315000	ADK_cam_18_93_714981_657983_20190726	12090201	2019-07-26	2019-12-09	137	2019	12	9	7	38	29	120	0.5	Moving/feeding/foraging	No reaction
ADK06	175	315000	ADK_cam_18_93_714981_657983_20190726	12240274	2019-07-26	2019-12-24	152	2019	12	24	7	52	51	121	0.5	Moving/feeding/foraging	No reaction
ADK06	175	315000	ADK_cam_18_93_714981_657983_20190726	12240274	2019-07-26	2019-12-24	152	2019	12	24	7	52	53	121	0.5	Moving/feeding/foraging	No reaction
ADK06	175	315000	ADK_cam_18_93_714981_657983_20190726	12240275	2019-07-26	2019-12-24	152	2019	12	24	7	53	0	122	0.5	Moving/feeding/foraging	No reaction
ADK06	175	315000	ADK_cam_18_93_714981_657983_20190726	12240275	2019-07-26	2019-12-24	152	2019	12	24	7	53	2	122	0.5	Moving/feeding/foraging	No reaction
ADK06	175	315000	ADK_cam_18_93_714981_657983_20190726	1040373	2019-07-26	2020-01-04	163	2020	1	4	7	27	1	123	3.5	Moving/feeding/foraging	No reaction
ADK06	175	315000	ADK_cam_18_93_714981_657983_20190726	1040373	2019-07-26	2020-01-04	163	2020	1	4	7	27	3	123	2.5	Moving/feeding/foraging	No reaction
ADK06	175	315000	ADK_cam_18_93_714981_657983_20190726	1040373	2019-07-26	2020-01-04	163	2020	1	4	7	27	5	123	2.5	Moving/feeding/foraging	No reaction
ADK06	175	315000	ADK_cam_18_93_714981_657983_20190726	1040374	2019-07-26	2020-01-04	163	2020	1	4	7	27	9	124	2.5	Moving/feeding/foraging	No reaction
ADK06	175	315000	ADK_cam_18_93_714981_657983_20190726	1040374	2019-07-26	2020-01-04	163	2020	1	4	7	27	11	124	2.5	Moving/feeding/foraging	No reaction
ADK06	175	315000	ADK_cam_18_93_714981_657983_20190726	1040374	2019-07-26	2020-01-04	163	2020	1	4	7	27	13	124	2.5	Moving/feeding/foraging	No reaction
ADK06	175	315000	ADK_cam_18_93_714981_657983_20190726	1040375	2019-07-26	2020-01-04	163	2020	1	4	7	27	18	125	2.5	Moving/feeding/foraging	No reaction
ADK06	175	315000	ADK_cam_18_93_714981_657983_20190726	1040375	2019-07-26	2020-01-04	163	2020	1	4	7	27	20	125	2.5	Moving/feeding/foraging	No reaction
ADK06	175	315000	ADK_cam_18_93_714981_657983_20190726	1040375	2019-07-26	2020-01-04	163	2020	1	4	7	27	22	125	2.5	Moving/feeding/foraging	No reaction
ADK06	175	315000	ADK_cam_18_93_714981_657983_20190726	1040376	2019-07-26	2020-01-04	163	2020	1	4	7	27	25	126	1.5	Moving/feeding/foraging	No reaction
ADK06	175	315000	ADK_cam_18_93_714981_657983_20190726	1040376	2019-07-26	2020-01-04	163	2020	1	4	7	27	27	126	1.5	Moving/feeding/foraging	No reaction
ADK06	175	315000	ADK_cam_18_93_714981_657983_20190726	1040376	2019-07-26	2020-01-04	163	2020	1	4	7	27	29	126	1.5	Moving/feeding/foraging	No reaction
ADK06	175	315000	ADK_cam_18_93_714981_657983_20190726	1040377	2019-07-26	2020-01-04	163	2020	1	4	7	27	42	127	1.5	Moving/feeding/foraging	No reaction
ADK06	175	315000	ADK_cam_18_93_714981_657983_20190726	1040377	2019-07-26	2020-01-04	163	2020	1	4	7	27	44	127	1.5	Moving/feeding/foraging	No reaction
ADK06	175	315000	ADK_cam_18_93_714981_657983_20190726	1040377	2019-07-26	2020-01-04	163	2020	1	4	7	27	46	127	1.5	Moving/feeding/foraging	No reaction
ADK06	175	315000	ADK_cam_18_93_714981_657983_20190726	1040378	2019-07-26	2020-01-04	163	2020	1	4	7	27	49	128	1.5	Moving/feeding/foraging	No reaction
ADK06	175	315000	ADK_cam_18_93_714981_657983_20190726	1040378	2019-07-26	2020-01-04	163	2020	1	4	7	27	51	128	1.5	Moving/feeding/foraging	No reaction
ADK06	175	315000	ADK_cam_18_93_714981_657983_20190726	1040378	2019-07-26	2020-01-04	163	2020	1	4	7	27	53	128	1.5	Moving/feeding/foraging	No reaction
ADK06	175	315000	ADK_cam_18_93_714981_657983_20190726	1040379	2019-07-26	2020-01-04	163	2020	1	4	7	27	57	129	0.5	Moving/feeding/foraging	No reaction
ADK06	175	315000	ADK_cam_18_93_714981_657983_20190726	1040379	2019-07-26	2020-01-04	163	2020	1	4	7	27	59	129	0.5	Moving/feeding/foraging	No reaction
ADK06	175	315000	ADK_cam_18_93_714981_657983_20190726	1040379	2019-07-26	2020-01-04	163	2020	1	4	7	28	1	129	0.5	Moving/feeding/foraging	No reaction
ADK06	111	199800	ADK_cam_18_93_714981_657983_20190726	1040380	2019-07-26	2020-01-04	163	2020	1	4	7	28	14	130	0.5	Moving/feeding/foraging	No reaction
ADK06	111	199800	ADK_cam_18_93_714981_657983_20190726	1040381	2019-07-26	2020-01-04	163	2020	1	4	7	28	27	131	0.5	Moving/feeding/foraging	No reaction
ADK06	111	199800	ADK_cam_18_93_714981_657983_20190726	1040381	2019-07-26	2020-01-04	163	2020	1	4	7	28	29	131	0.5	Moving/feeding/foraging	No reaction
ADK07	111	199800	ADK_cam_18_83_720999_657983_20190725	10020120	2019-07-25	2019-10-02	70	2019	10	2	7	50	50	132	2.5	Moving/feeding/foraging	No reaction
ADK07	92	165600	ADK_cam_18_83_720999_657983_20190725	10020120	2019-07-25	2019-10-02	70	2019	10	2	7	50	52	132	1.5	Moving/feeding/foraging	No reaction
ADK07	92	165600	ADK_cam_18_83_720999_657983_20190725	10030124	2019-07-25	2019-10-03	71	2019	10	3	7	14	34	133	1.5	Moving/feeding/foraging	No reaction
ADK07	95	171000	ADK_cam_18_83_720999_657983_20190725	10030125	2019-07-25	2019-10-03	71	2019	10	3	7	20	52	134	2.5	Moving/feeding/foraging	No reaction
ADK09	95	171000	ADK_cam_18_88_700015_661014_20191201	1030046	2019-12-01	2020-01-03	34	2020	1	3	7	36	39	135	6.5	Moving/feeding/foraging	No reaction
ADK09	95	171000	ADK_cam_18_88_700015_661014_20191201	1030046	2019-12-01	2020-01-03	34	2020	1	3	7	36	41	135	9	Moving/feeding/foraging	No reaction
ADK10	95	171000	ADK_cam_18_103_705980_661007_20191129	12250073	2019-11-29	2019-12-25	27	2019	12	25	7	59	13	136	5.5	Moving/feeding/foraging	No reaction
ADK10	95	171000	ADK_cam_18_103_705980_661007_20191129	12250073	2019-11-29	2019-12-25	27	2019	12	25	7	59	15	136	5.5	Moving/feeding/foraging	No reaction
ADK10	95	171000	ADK_cam_18_103_705980_661007_20191129	12250073	2019-11-29	2019-12-25	27	2019	12	25	7	59	17	136	6.5	Moving/feeding/foraging	No reaction
ADK10	95	171000	ADK_cam_18_103_705980_661007_20191129	12250073	2019-11-29	2019-12-25	27	2019	12	25	7	59	19	136	6.5	Moving/feeding/foraging	No reaction
ADK10	95	171000	ADK_cam_18_103_705980_661007_20191129	12250073	2019-11-29	2019-12-25	27	2019	12	25	7	59	21	136	7.5	Moving/feeding/foraging	No reaction
ADK10	95	171000	ADK_cam_18_103_705980_661007_20191129	12250073	2019-11-29	2019-12-25	27	2019	12	25	7	59	23	136	7.5	Moving/feeding/foraging	No reaction
ADK10	95	171000	ADK_cam_18_103_705980_661007_20191129	12250073	2019-11-29	2019-12-25	27	2019	12	25	7	59	25	136	7.5	Moving/feeding/foraging	No reaction
ADK10	95	171000	ADK_cam_18_103_705980_661007_20191129	12250073	2019-11-29	2019-12-25	27	2019	12	25	7	59	27	136	7.5	Moving/feeding/foraging	No reaction
ADK10	95	171000	ADK_cam_18_103_705980_661007_20191129	12250073	2019-11-29	2019-12-25	27	2019	12	25	7	59	29	136	7.5	Moving/feeding/foraging	No reaction
ADK10	95	171000	ADK_cam_18_103_705980_661007_20191129	12250073	2019-11-29	2019-12-25	27	2019	12	25	7	59	31	136	7.5	Moving/feeding/foraging	No reaction
ADK10	95	171000	ADK_cam_18_103_705980_661007_20191129	12250073	2019-11-29	2019-12-25	27	2019	12	25	7	59	33	136	7.5	Moving/feeding/foraging	No reaction
ADK10	95	171000	ADK_cam_18_103_705980_661007_20191129	1120179	2019-11-29	2020-01-12	45	2020	1	12	7	24	12	137	4.5	Moving/feeding/foraging	No reaction
ADK10	95	171000	ADK_cam_18_103_705980_661007_20191129	1120179	2019-11-29	2020-01-12	45	2020	1	12	7	24	14	137	4.5	Moving/feeding/foraging	No reaction
ADK10	95	171000	ADK_cam_18_103_705980_661007_20191129	1120179	2019-11-29	2020-01-12	45	2020	1	12	7	24	16	137	3.5	Moving/feeding/foraging	No reaction
ADK10	95	171000	ADK_cam_18_103_705980_661007_20191129	1240223	2019-11-29	2020-01-24	57	2020	1	24	7	15	15	138	6.5	Moving/feeding/foraging	No reaction
ADK10	95	171000	ADK_cam_18_103_705980_661007_20191129	1240223	2019-11-29	2020-01-24	57	2020	1	24	7	15	17	138	6.5	Moving/feeding/foraging	No reaction
ADK10	95	171000	ADK_cam_18_103_705980_661007_20191129	1240223	2019-11-29	2020-01-24	57	2020	1	24	7	15	19	138	6.5	Moving/feeding/foraging	No reaction
ADK10	95	171000	ADK_cam_18_103_705980_661007_20191129	1240223	2019-11-29	2020-01-24	57	2020	1	24	7	15	21	138	6.5	Moving/feeding/foraging	No reaction
ADK10	95	171000	ADK_cam_18_103_705980_661007_20191129	1240223	2019-11-29	2020-01-24	57	2020	1	24	7	15	23	138	6.5	Moving/feeding/foraging	No reaction
ADK10	95	171000	ADK_cam_18_103_705980_661007_20191129	1240223	2019-11-29	2020-01-24	57	2020	1	24	7	15	25	138	6.5	Moving/feeding/foraging	No reaction
ADK10	95	171000	ADK_cam_18_103_705980_661007_20191129	1240224	2019-11-29	2020-01-24	57	2020	1	24	7	15	44	139	6.5	Moving/feeding/foraging	No reaction
ADK10	95	171000	ADK_cam_18_103_705980_661007_20191129	1240224	2019-11-29	2020-01-24	57	2020	1	24	7	15	46	139	6.5	Moving/feeding/foraging	No reaction
ADK10	95	171000	ADK_cam_18_103_705980_661007_20191129	1240224	2019-11-29	2020-01-24	57	2020	1	24	7	15	48	139	6.5	Moving/feeding/foraging	No reaction
ADK10	95	171000	ADK_cam_18_103_705980_661007_20191129	1240224	2019-11-29	2020-01-24	57	2020	1	24	7	15	50	139	6.5	Moving/feeding/foraging	No reaction
ADK10	95	171000	ADK_cam_18_103_705980_661007_20191129	1240224	2019-11-29	2020-01-24	57	2020	1	24	7	15	52	139	6.5	Moving/feeding/foraging	No reaction
ADK10	95	171000	ADK_cam_18_103_705980_661007_20191129	1240225	2019-11-29	2020-01-24	57	2020	1	24	7	16	6	140	6.5	Moving/feeding/foraging	No reaction
ADK10	95	171000	ADK_cam_18_103_705980_661007_20191129	1240225	2019-11-29	2020-01-24	57	2020	1	24	7	16	8	140	6.5	Moving/feeding/foraging	No reaction
ADK10	95	171000	ADK_cam_18_103_705980_661007_20191129	1240225	2019-11-29	2020-01-24	57	2020	1	24	7	16	10	140	6.5	Moving/feeding/foraging	No reaction
ADK10	95	171000	ADK_cam_18_103_705980_661007_20191129	1240225	2019-11-29	2020-01-24	57	2020	1	24	7	16	12	140	6.5	Moving/feeding/foraging	No reaction
ADK10	95	171000	ADK_cam_18_103_705980_661007_20191129	2060272	2019-11-29	2020-02-06	70	2020	2	6	7	50	14	141	6.5	Moving/feeding/foraging	No reaction
ADK10	95	171000	ADK_cam_18_103_705980_661007_20191129	2060272	2019-11-29	2020-02-06	70	2020	2	6	7	50	16	141	6.5	Moving/feeding/foraging	No reaction
ADK10	95	171000	ADK_cam_18_103_705980_661007_20191129	2060272	2019-11-29	2020-02-06	70	2020	2	6	7	50	18	141	6.5	Moving/feeding/foraging	No reaction
ADK10	95	171000	ADK_cam_18_103_705980_661007_20191129	2110281	2019-11-29	2020-02-06	70	2020	2	6	7	11	4	142	6.5	Moving/feeding/foraging	No reaction
ADK10	95	171000	ADK_cam_18_103_705980_661007_20191129	2110281	2019-11-29	2020-02-06	70	2020	2	6	7	11	6	142	6.5	Moving/feeding/foraging	No reaction
ADK10	95	171000	ADK_cam_18_103_705980_661007_20191129	2110281	2019-11-29	2020-02-06	70	2020	2	6	7	11	4	143	6.5	Moving/feeding/foraging	No reaction
ADK10	97	174600	ADK_cam_18_103_705980_661007_20191129	2110281	2019-11-29	2020-02-06	70	2020	2	6	7	11	6	143	6.5	Moving/feeding/foraging	No reaction
ADK10	97	174600	ADK_cam_18_103_705980_661007_20191129	2110281	2019-11-29	2020-02-06	70	2020	2	6	7	11	8	143	6.5	Moving/feeding/foraging	No reaction
ADK10	97	174600	ADK_cam_18_103_705980_661007_20191129	2110282	2019-11-29	2020-02-06	70	2020	2	6	7	11	8	144	6.5	Moving/feeding/foraging	No reaction
ADK11	97	174600	ADK_cam_18_85_712009_661021_20190727	8040023	2019-07-27	2019-08-04	9	2019	8	4	7	40	21	145	5.5	Moving/feeding/foraging	No reaction
ADK11	97	174600	ADK_cam_18_85_712009_661021_20190727	8040023	2019-07-27	2019-08-04	9	2019	8	4	7	40	23	145	5.5	Moving/feeding/foraging	No reaction
ADK11	97	174600	ADK_cam_18_85_712009_661021_20190727	8040023	2019-07-27	2019-08-04	9	2019	8	4	7	40	25	145	5.5	Moving/feeding/foraging	No reaction
ADK11	97	174600	ADK_cam_18_85_712009_661021_20190727	8040023	2019-07-27	2019-08-04	9	2019	8	4	7	40	27	145	5.5	Moving/feeding/foraging	No reaction
ADK11	97	174600	ADK_cam_18_85_712009_661021_20190727	8040023	2019-07-27	2019-08-04	9	2019	8	4	7	40	29	145	5.5	Moving/feeding/foraging	No reaction
ADK11	97	174600	ADK_cam_18_85_712009_661021_20190727	8040023	2019-07-27	2019-08-04	9	2019	8	4	7	40	31	145	5.5	Moving/feeding/foraging	No reaction
ADK11	97	174600	ADK_cam_18_85_712009_661021_20190727	8040023	2019-07-27	2019-08-04	9	2019	8	4	7	40	33	145	5.5	Moving/feeding/foraging	No reaction
ADK11	97	174600	ADK_cam_18_85_712009_661021_20190727	8110060	2019-07-27	2019-08-11	16	2019	8	11	7	4	17	146	11	Moving/feeding/foraging	No reaction
ADK11	97	174600	ADK_cam_18_85_712009_661021_20190727	8140085	2019-07-27	2019-08-14	19	2019	8	14	7	0	8	147	6.5	Moving/feeding/foraging	No reaction
ADK11	97	174600	ADK_cam_18_85_712009_661021_20190727	8140085	2019-07-27	2019-08-14	19	2019	8	14	7	0	10	147	6.5	Moving/feeding/foraging	No reaction
ADK11	97	174600	ADK_cam_18_85_712009_661021_20190727	8140085	2019-07-27	2019-08-14	19	2019	8	14	7	0	12	147	5.5	Moving/feeding/foraging	No reaction
ADK11	97	174600	ADK_cam_18_85_712009_661021_20190727	8140085	2019-07-27	2019-08-14	19	2019	8	14	7	0	14	147	5.5	Moving/feeding/foraging	No reaction
ADK11	97	174600	ADK_cam_18_85_712009_661021_20190727	8140086	2019-07-27	2019-08-14	19	2019	8	14	7	16	20	148	2.5	Moving/feeding/foraging	No reaction
ADK11	97	174600	ADK_cam_18_85_712009_661021_20190727	8140086	2019-07-27	2019-08-14	19	2019	8	14	7	16	22	148	2.5	Moving/feeding/foraging	No reaction
ADK11	97	174600	ADK_cam_18_85_712009_661021_20190727	8140086	2019-07-27	2019-08-14	19	2019	8	14	7	16	24	148	2.5	Moving/feeding/foraging	No reaction
ADK11	97	174600	ADK_cam_18_85_712009_661021_20190727	8140086	2019-07-27	2019-08-14	19	2019	8	14	7	16	26	148	2.5	Moving/feeding/foraging	No reaction
ADK11	97	174600	ADK_cam_18_85_712009_661021_20190727	8140086	2019-07-27	2019-08-14	19	2019	8	14	7	16	28	148	2.5	Moving/feeding/foraging	No reaction
ADK11	97	174600	ADK_cam_18_85_712009_661021_20190727	8140086	2019-07-27	2019-08-14	19	2019	8	14	7	16	30	148	2.5	Moving/feeding/foraging	No reaction
ADK11	97	174600	ADK_cam_18_85_712009_661021_20190727	8140086	2019-07-27	2019-08-14	19	2019	8	14	7	16	32	148	2.5	Moving/feeding/foraging	No reaction
ADK11	97	174600	ADK_cam_18_85_712009_661021_20190727	8140086	2019-07-27	2019-08-14	19	2019	8	14	7	16	34	148	2.5	Moving/feeding/foraging	No reaction
ADK11	97	174600	ADK_cam_18_85_712009_661021_20190727	8140086	2019-07-27	2019-08-14	19	2019	8	14	7	16	36	148	2.5	Moving/feeding/foraging	No reaction
ADK11	97	174600	ADK_cam_18_85_712009_661021_20190727	8140086	2019-07-27	2019-08-14	19	2019	8	14	7	16	38	148	2.5	Moving/feeding/foraging	No reaction
ADK11	97	174600	ADK_cam_18_85_712009_661021_20190727	8140086	2019-07-27	2019-08-14	19	2019	8	14	7	16	40	148	2.5	Moving/feeding/foraging	No reaction
ADK11	97	174600	ADK_cam_18_85_712009_661021_20190727	8140086	2019-07-27	2019-08-14	19	2019	8	14	7	16	42	148	2.5	Moving/feeding/foraging	No reaction
ADK11	97	174600	ADK_cam_18_85_712009_661021_20190727	8140086	2019-07-27	2019-08-14	19	2019	8	14	7	16	44	148	2.5	Moving/feeding/foraging	No reaction
ADK11	97	174600	ADK_cam_18_85_712009_661021_20190727	8140086	2019-07-27	2019-08-14	19	2019	8	14	7	16	46	148	2.5	Moving/feeding/foraging	No reaction
ADK11	97	174600	ADK_cam_18_85_712009_661021_20190727	8140086	2019-07-27	2019-08-14	19	2019	8	14	7	16	48	148	2.5	Moving/feeding/foraging	No reaction
ADK11	97	174600	ADK_cam_18_85_712009_661021_20190727	8150091	2019-07-27	2019-08-15	20	2019	8	15	7	39	33	149	3.5	Moving/feeding/foraging	No reaction
ADK11	97	174600	ADK_cam_18_85_712009_661021_20190727	8150091	2019-07-27	2019-08-15	20	2019	8	15	7	39	33	150	9	Moving/feeding/foraging	No reaction
ADK11	97	174600	ADK_cam_18_85_712009_661021_20190727	8150091	2019-07-27	2019-08-15	20	2019	8	15	7	39	35	150	9	Moving/feeding/foraging	No reaction
ADK11	97	174600	ADK_cam_18_85_712009_661021_20190727	8150091	2019-07-27	2019-08-15	20	2019	8	15	7	39	37	150	9	Moving/feeding/foraging	No reaction
ADK11	97	174600	ADK_cam_18_85_712009_661021_20190727	8150091	2019-07-27	2019-08-15	20	2019	8	15	7	39	39	150	9	Moving/feeding/foraging	No reaction
ADK11	97	174600	ADK_cam_18_85_712009_661021_20190727	8150091	2019-07-27	2019-08-15	20	2019	8	15	7	39	35	151	11	Moving/feeding/foraging	No reaction
ADK11	97	174600	ADK_cam_18_85_712009_661021_20190727	8150091	2019-07-27	2019-08-15	20	2019	8	15	7	39	37	151	9	Moving/feeding/foraging	No reaction
ADK11	97	174600	ADK_cam_18_85_712009_661021_20190727	8150091	2019-07-27	2019-08-15	20	2019	8	15	7	39	39	151	9	Moving/feeding/foraging	No reaction
ADK11	97	174600	ADK_cam_18_85_712009_661021_20190727	8150091	2019-07-27	2019-08-15	20	2019	8	15	7	39	41	151	9	Moving/feeding/foraging	No reaction
ADK11	97	174600	ADK_cam_18_85_712009_661021_20190727	8150091	2019-07-27	2019-08-15	20	2019	8	15	7	39	43	151	7.5	Moving/feeding/foraging	No reaction
ADK11	97	174600	ADK_cam_18_85_712009_661021_20190727	8150091	2019-07-27	2019-08-15	20	2019	8	15	7	39	45	151	7.5	Moving/feeding/foraging	No reaction
ADK11	97	174600	ADK_cam_18_85_712009_661021_20190727	8150091	2019-07-27	2019-08-15	20	2019	8	15	7	39	47	151	7.5	Moving/feeding/foraging	No reaction
ADK11	97	174600	ADK_cam_18_85_712009_661021_20190727	8150091	2019-07-27	2019-08-15	20	2019	8	15	7	39	49	151	7.5	Moving/feeding/foraging	No reaction
ADK11	97	174600	ADK_cam_18_85_712009_661021_20190727	8150091	2019-07-27	2019-08-15	20	2019	8	15	7	39	51	151	6.5	Moving/feeding/foraging	No reaction
ADK11	97	174600	ADK_cam_18_85_712009_661021_20190727	8150091	2019-07-27	2019-08-15	20	2019	8	15	7	39	53	151	6.5	Moving/feeding/foraging	No reaction
ADK11	97	174600	ADK_cam_18_85_712009_661021_20190727	8150091	2019-07-27	2019-08-15	20	2019	8	15	7	39	55	151	5.5	Moving/feeding/foraging	No reaction
ADK11	97	174600	ADK_cam_18_85_712009_661021_20190727	8150091	2019-07-27	2019-08-15	20	2019	8	15	7	39	57	151	5.5	Moving/feeding/foraging	No reaction
ADK11	97	174600	ADK_cam_18_85_712009_661021_20190727	8150091	2019-07-27	2019-08-15	20	2019	8	15	7	39	59	151	5.5	Moving/feeding/foraging	No reaction
ADK11	97	174600	ADK_cam_18_85_712009_661021_20190727	8150091	2019-07-27	2019-08-15	20	2019	8	15	7	40	1	151	4.5	Moving/feeding/foraging	No reaction
ADK11	97	174600	ADK_cam_18_85_712009_661021_20190727	8150091	2019-07-27	2019-08-15	20	2019	8	15	7	40	3	151	4.5	Moving/feeding/foraging	No reaction
ADK11	97	174600	ADK_cam_18_85_712009_661021_20190727	8150091	2019-07-27	2019-08-15	20	2019	8	15	7	40	5	151	3.5	Moving/feeding/foraging	No reaction
ADK11	97	174600	ADK_cam_18_85_712009_661021_20190727	8150091	2019-07-27	2019-08-15	20	2019	8	15	7	40	7	151	3.5	Moving/feeding/foraging	No reaction
ADK11	97	174600	ADK_cam_18_85_712009_661021_20190727	8150091	2019-07-27	2019-08-15	20	2019	8	15	7	39	45	152	11	Moving/feeding/foraging	No reaction
ADK11	97	174600	ADK_cam_18_85_712009_661021_20190727	8150091	2019-07-27	2019-08-15	20	2019	8	15	7	39	47	152	11	Moving/feeding/foraging	No reaction
ADK11	97	174600	ADK_cam_18_85_712009_661021_20190727	8150091	2019-07-27	2019-08-15	20	2019	8	15	7	39	49	152	11	Moving/feeding/foraging	No reaction
ADK11	97	174600	ADK_cam_18_85_712009_661021_20190727	8150091	2019-07-27	2019-08-15	20	2019	8	15	7	39	51	152	11	Moving/feeding/foraging	No reaction
ADK11	97	174600	ADK_cam_18_85_712009_661021_20190727	8150091	2019-07-27	2019-08-15	20	2019	8	15	7	39	53	152	11	Moving/feeding/foraging	No reaction
ADK11	97	174600	ADK_cam_18_85_712009_661021_20190727	8150091	2019-07-27	2019-08-15	20	2019	8	15	7	39	55	152	11	Moving/feeding/foraging	No reaction
ADK11	97	174600	ADK_cam_18_85_712009_661021_20190727	8150091	2019-07-27	2019-08-15	20	2019	8	15	7	39	57	152	11	Moving/feeding/foraging	No reaction
ADK11	97	174600	ADK_cam_18_85_712009_661021_20190727	8150091	2019-07-27	2019-08-15	20	2019	8	15	7	39	59	152	11	Moving/feeding/foraging	No reaction
ADK11	97	174600	ADK_cam_18_85_712009_661021_20190727	8150091	2019-07-27	2019-08-15	20	2019	8	15	7	40	1	152	11	Moving/feeding/foraging	No reaction
ADK11	97	174600	ADK_cam_18_85_712009_661021_20190727	8150091	2019-07-27	2019-08-15	20	2019	8	15	7	40	3	152	11	Moving/feeding/foraging	No reaction
ADK11	97	174600	ADK_cam_18_85_712009_661021_20190727	8150091	2019-07-27	2019-08-15	20	2019	8	15	7	40	5	152	11	Moving/feeding/foraging	No reaction
ADK11	97	174600	ADK_cam_18_85_712009_661021_20190727	8150091	2019-07-27	2019-08-15	20	2019	8	15	7	40	7	152	11	Moving/feeding/foraging	No reaction
ADK11	97	174600	ADK_cam_18_85_712009_661021_20190727	8150091	2019-07-27	2019-08-15	20	2019	8	15	7	40	9	152	11	Moving/feeding/foraging	No reaction
ADK11	97	174600	ADK_cam_18_85_712009_661021_20190727	8150091	2019-07-27	2019-08-15	20	2019	8	15	7	40	11	152	11	Moving/feeding/foraging	No reaction
ADK11	97	174600	ADK_cam_18_85_712009_661021_20190727	8150091	2019-07-27	2019-08-15	20	2019	8	15	7	40	13	152	11	Moving/feeding/foraging	No reaction
ADK11	97	174600	ADK_cam_18_85_712009_661021_20190727	8150091	2019-07-27	2019-08-15	20	2019	8	15	7	40	15	152	11	Moving/feeding/foraging	No reaction
ADK11	97	174600	ADK_cam_18_85_712009_661021_20190727	8150091	2019-07-27	2019-08-15	20	2019	8	15	7	40	17	152	11	Moving/feeding/foraging	No reaction
ADK11	97	174600	ADK_cam_18_85_712009_661021_20190727	8150091	2019-07-27	2019-08-15	20	2019	8	15	7	40	19	152	9	Moving/feeding/foraging	No reaction
ADK11	97	174600	ADK_cam_18_85_712009_661021_20190727	8150091	2019-07-27	2019-08-15	20	2019	8	15	7	40	21	152	9	Moving/feeding/foraging	No reaction
ADK11	97	174600	ADK_cam_18_85_712009_661021_20190727	8160095	2019-07-27	2019-08-16	21	2019	8	16	7	28	40	153	4.5	Moving/feeding/foraging	No reaction
ADK11	97	174600	ADK_cam_18_85_712009_661021_20190727	8160095	2019-07-27	2019-08-16	21	2019	8	16	7	28	42	153	4.5	Moving/feeding/foraging	No reaction
ADK11	97	174600	ADK_cam_18_85_712009_661021_20190727	8160095	2019-07-27	2019-08-16	21	2019	8	16	7	28	44	153	4.5	Moving/feeding/foraging	No reaction
ADK11	97	174600	ADK_cam_18_85_712009_661021_20190727	8160095	2019-07-27	2019-08-16	21	2019	8	16	7	28	42	154	4.5	Moving/feeding/foraging	No reaction
ADK11	97	174600	ADK_cam_18_85_712009_661021_20190727	8160095	2019-07-27	2019-08-16	21	2019	8	16	7	28	44	154	4.5	Moving/feeding/foraging	No reaction
ADK11	97	174600	ADK_cam_18_85_712009_661021_20190727	8160095	2019-07-27	2019-08-16	21	2019	8	16	7	28	46	154	4.5	Moving/feeding/foraging	No reaction
ADK11	97	174600	ADK_cam_18_85_712009_661021_20190727	8160095	2019-07-27	2019-08-16	21	2019	8	16	7	28	48	154	4.5	Moving/feeding/foraging	No reaction
ADK11	97	174600	ADK_cam_18_85_712009_661021_20190727	8160095	2019-07-27	2019-08-16	21	2019	8	16	7	28	50	154	4.5	Moving/feeding/foraging	No reaction
ADK11	97	174600	ADK_cam_18_85_712009_661021_20190727	8160095	2019-07-27	2019-08-16	21	2019	8	16	7	29	8	155	4.5	Moving/feeding/foraging	No reaction
ADK11	97	174600	ADK_cam_18_85_712009_661021_20190727	8160095	2019-07-27	2019-08-16	21	2019	8	16	7	29	10	155	4.5	Moving/feeding/foraging	No reaction
ADK11	97	174600	ADK_cam_18_85_712009_661021_20190727	8160095	2019-07-27	2019-08-16	21	2019	8	16	7	29	12	155	4.5	Moving/feeding/foraging	No reaction
ADK11	97	174600	ADK_cam_18_85_712009_661021_20190727	8160095	2019-07-27	2019-08-16	21	2019	8	16	7	29	14	155	3.5	Moving/feeding/foraging	No reaction
ADK11	97	174600	ADK_cam_18_85_712009_661021_20190727	8170111	2019-07-27	2019-08-17	22	2019	8	17	7	27	25	156	13.5	Moving/feeding/foraging	No reaction
ADK11	97	174600	ADK_cam_18_85_712009_661021_20190727	8170111	2019-07-27	2019-08-17	22	2019	8	17	7	27	27	156	13.5	Moving/feeding/foraging	No reaction
ADK11	97	174600	ADK_cam_18_85_712009_661021_20190727	8170111	2019-07-27	2019-08-17	22	2019	8	17	7	27	29	156	13.5	Moving/feeding/foraging	No reaction
ADK11	97	174600	ADK_cam_18_85_712009_661021_20190727	8170111	2019-07-27	2019-08-17	22	2019	8	17	7	27	31	156	13.5	Moving/feeding/foraging	No reaction
ADK11	97	174600	ADK_cam_18_85_712009_661021_20190727	8170111	2019-07-27	2019-08-17	22	2019	8	17	7	27	25	157	13.5	Moving/feeding/foraging	No reaction
ADK11	97	174600	ADK_cam_18_85_712009_661021_20190727	8170111	2019-07-27	2019-08-17	22	2019	8	17	7	27	27	157	13.5	Moving/feeding/foraging	No reaction
ADK11	97	174600	ADK_cam_18_85_712009_661021_20190727	8170111	2019-07-27	2019-08-17	22	2019	8	17	7	27	29	157	13.5	Moving/feeding/foraging	No reaction
ADK11	97	174600	ADK_cam_18_85_712009_661021_20190727	8180117	2019-07-27	2019-08-18	23	2019	8	18	7	6	56	158	5.5	Moving/feeding/foraging	No reaction
ADK11	97	174600	ADK_cam_18_85_712009_661021_20190727	8180117	2019-07-27	2019-08-18	23	2019	8	18	7	6	58	158	5.5	Moving/feeding/foraging	No reaction
ADK11	97	174600	ADK_cam_18_85_712009_661021_20190727	8180117	2019-07-27	2019-08-18	23	2019	8	18	7	7	0	158	5.5	Moving/feeding/foraging	No reaction
ADK11	97	174600	ADK_cam_18_85_712009_661021_20190727	8180117	2019-07-27	2019-08-18	23	2019	8	18	7	7	2	158	5.5	Moving/feeding/foraging	No reaction
ADK11	97	174600	ADK_cam_18_85_712009_661021_20190727	8180117	2019-07-27	2019-08-18	23	2019	8	18	7	7	4	158	6.5	Moving/feeding/foraging	No reaction
ADK11	97	174600	ADK_cam_18_85_712009_661021_20190727	8180117	2019-07-27	2019-08-18	23	2019	8	18	7	7	6	158	7.5	Moving/feeding/foraging	No reaction
ADK11	97	174600	ADK_cam_18_85_712009_661021_20190727	8180117	2019-07-27	2019-08-18	23	2019	8	18	7	7	8	158	7.5	Moving/feeding/foraging	No reaction
ADK11	97	174600	ADK_cam_18_85_712009_661021_20190727	8180117	2019-07-27	2019-08-18	23	2019	8	18	7	7	0	159	2.5	Moving/feeding/foraging	No reaction
ADK11	97	174600	ADK_cam_18_85_712009_661021_20190727	8180117	2019-07-27	2019-08-18	23	2019	8	18	7	7	2	159	2.5	Moving/feeding/foraging	No reaction
ADK11	97	174600	ADK_cam_18_85_712009_661021_20190727	8180117	2019-07-27	2019-08-18	23	2019	8	18	7	7	4	159	3.5	Moving/feeding/foraging	No reaction
ADK11	97	174600	ADK_cam_18_85_712009_661021_20190727	8180117	2019-07-27	2019-08-18	23	2019	8	18	7	7	6	159	3.5	Moving/feeding/foraging	No reaction
ADK11	97	174600	ADK_cam_18_85_712009_661021_20190727	8180117	2019-07-27	2019-08-18	23	2019	8	18	7	7	8	159	4.5	Moving/feeding/foraging	No reaction
ADK11	97	174600	ADK_cam_18_85_712009_661021_20190727	8180117	2019-07-27	2019-08-18	23	2019	8	18	7	7	10	159	5.5	Moving/feeding/foraging	No reaction
ADK11	97	174600	ADK_cam_18_85_712009_661021_20190727	8180117	2019-07-27	2019-08-18	23	2019	8	18	7	7	12	159	6.5	Moving/feeding/foraging	No reaction
ADK11	97	174600	ADK_cam_18_85_712009_661021_20190727	8180117	2019-07-27	2019-08-18	23	2019	8	18	7	7	14	159	6.5	Moving/feeding/foraging	No reaction
ADK11	97	174600	ADK_cam_18_85_712009_661021_20190727	8180117	2019-07-27	2019-08-18	23	2019	8	18	7	7	16	159	7.5	Moving/feeding/foraging	No reaction
ADK11	97	174600	ADK_cam_18_85_712009_661021_20190727	8180117	2019-07-27	2019-08-18	23	2019	8	18	7	7	18	159	9	Moving/feeding/foraging	No reaction
ADK11	97	174600	ADK_cam_18_85_712009_661021_20190727	8180117	2019-07-27	2019-08-18	23	2019	8	18	7	7	20	159	9	Moving/feeding/foraging	No reaction
ADK11	97	174600	ADK_cam_18_85_712009_661021_20190727	8180117	2019-07-27	2019-08-18	23	2019	8	18	7	7	22	159	9	Moving/feeding/foraging	No reaction
ADK11	97	174600	ADK_cam_18_85_712009_661021_20190727	8180118	2019-07-27	2019-08-18	23	2019	8	18	7	14	14	160	5.5	Moving/feeding/foraging	No reaction
ADK11	97	174600	ADK_cam_18_85_712009_661021_20190727	8180118	2019-07-27	2019-08-18	23	2019	8	18	7	14	16	160	5.5	Moving/feeding/foraging	No reaction
ADK11	97	174600	ADK_cam_18_85_712009_661021_20190727	8180118	2019-07-27	2019-08-18	23	2019	8	18	7	14	14	161	4.5	Moving/feeding/foraging	No reaction
ADK11	97	174600	ADK_cam_18_85_712009_661021_20190727	8180118	2019-07-27	2019-08-18	23	2019	8	18	7	14	16	161	4.5	Moving/feeding/foraging	No reaction
ADK11	97	174600	ADK_cam_18_85_712009_661021_20190727	8180118	2019-07-27	2019-08-18	23	2019	8	18	7	14	18	161	4.5	Moving/feeding/foraging	No reaction
ADK11	97	174600	ADK_cam_18_85_712009_661021_20190727	8180118	2019-07-27	2019-08-18	23	2019	8	18	7	14	20	161	3.5	Moving/feeding/foraging	No reaction
ADK11	97	174600	ADK_cam_18_85_712009_661021_20190727	8180118	2019-07-27	2019-08-18	23	2019	8	18	7	14	22	161	2.5	Moving/feeding/foraging	No reaction
ADK11	97	174600	ADK_cam_18_85_712009_661021_20190727	8180118	2019-07-27	2019-08-18	23	2019	8	18	7	14	24	161	2.5	Moving/feeding/foraging	No reaction
ADK11	97	174600	ADK_cam_18_85_712009_661021_20190727	8180118	2019-07-27	2019-08-18	23	2019	8	18	7	14	26	161	2.5	Moving/feeding/foraging	No reaction
ADK11	97	174600	ADK_cam_18_85_712009_661021_20190727	8180118	2019-07-27	2019-08-18	23	2019	8	18	7	14	28	161	2.5	Moving/feeding/foraging	No reaction
ADK11	97	174600	ADK_cam_18_85_712009_661021_20190727	8180119	2019-07-27	2019-08-18	23	2019	8	18	7	16	4	162	7.5	Moving/feeding/foraging	No reaction
ADK11	97	174600	ADK_cam_18_85_712009_661021_20190727	8180119	2019-07-27	2019-08-18	23	2019	8	18	7	16	6	162	9	Moving/feeding/foraging	No reaction
ADK11	97	174600	ADK_cam_18_85_712009_661021_20190727	8180119	2019-07-27	2019-08-18	23	2019	8	18	7	16	8	162	9	Moving/feeding/foraging	No reaction
ADK11	97	174600	ADK_cam_18_85_712009_661021_20190727	8180119	2019-07-27	2019-08-18	23	2019	8	18	7	16	10	162	9	Moving/feeding/foraging	No reaction
ADK11	97	174600	ADK_cam_18_85_712009_661021_20190727	8180119	2019-07-27	2019-08-18	23	2019	8	18	7	16	12	162	11	Moving/feeding/foraging	No reaction
ADK11	97	174600	ADK_cam_18_85_712009_661021_20190727	8180119	2019-07-27	2019-08-18	23	2019	8	18	7	16	14	162	11	Moving/feeding/foraging	No reaction
ADK11	97	174600	ADK_cam_18_85_712009_661021_20190727	8200133	2019-07-27	2019-08-20	25	2019	8	20	7	11	59	163	9	Moving/feeding/foraging	No reaction
ADK11	97	174600	ADK_cam_18_85_712009_661021_20190727	8200133	2019-07-27	2019-08-20	25	2019	8	20	7	12	1	163	9	Moving/feeding/foraging	No reaction
ADK11	97	174600	ADK_cam_18_85_712009_661021_20190727	8200133	2019-07-27	2019-08-20	25	2019	8	20	7	12	3	163	9	Moving/feeding/foraging	No reaction
ADK11	97	174600	ADK_cam_18_85_712009_661021_20190727	8200134	2019-07-27	2019-08-20	25	2019	8	20	7	18	53	164	7.5	Moving/feeding/foraging	No reaction
ADK11	97	174600	ADK_cam_18_85_712009_661021_20190727	8200134	2019-07-27	2019-08-20	25	2019	8	20	7	18	55	164	7.5	Moving/feeding/foraging	No reaction
ADK11	97	174600	ADK_cam_18_85_712009_661021_20190727	8200134	2019-07-27	2019-08-20	25	2019	8	20	7	18	57	164	7.5	Moving/feeding/foraging	No reaction
ADK11	97	174600	ADK_cam_18_85_712009_661021_20190727	8200134	2019-07-27	2019-08-20	25	2019	8	20	7	18	59	164	9	Moving/feeding/foraging	No reaction
ADK11	97	174600	ADK_cam_18_85_712009_661021_20190727	8200134	2019-07-27	2019-08-20	25	2019	8	20	7	19	1	164	9	Moving/feeding/foraging	No reaction
ADK11	97	174600	ADK_cam_18_85_712009_661021_20190727	8200134	2019-07-27	2019-08-20	25	2019	8	20	7	19	3	164	9	Moving/feeding/foraging	No reaction
ADK11	97	174600	ADK_cam_18_85_712009_661021_20190727	8200134	2019-07-27	2019-08-20	25	2019	8	20	7	19	5	164	9	Moving/feeding/foraging	No reaction
ADK11	97	174600	ADK_cam_18_85_712009_661021_20190727	8200134	2019-07-27	2019-08-20	25	2019	8	20	7	19	7	164	9	Moving/feeding/foraging	No reaction
ADK11	97	174600	ADK_cam_18_85_712009_661021_20190727	8210142	2019-07-27	2019-08-21	26	2019	8	21	7	22	22	165	5.5	Moving/feeding/foraging	No reaction
ADK11	97	174600	ADK_cam_18_85_712009_661021_20190727	8210142	2019-07-27	2019-08-21	26	2019	8	21	7	22	24	165	6.5	Moving/feeding/foraging	No reaction
ADK11	97	174600	ADK_cam_18_85_712009_661021_20190727	8210142	2019-07-27	2019-08-21	26	2019	8	21	7	22	26	165	7.5	Moving/feeding/foraging	No reaction
ADK11	97	174600	ADK_cam_18_85_712009_661021_20190727	8210142	2019-07-27	2019-08-21	26	2019	8	21	7	22	28	165	7.5	Moving/feeding/foraging	No reaction
ADK11	97	174600	ADK_cam_18_85_712009_661021_20190727	8210142	2019-07-27	2019-08-21	26	2019	8	21	7	22	30	165	7.5	Moving/feeding/foraging	No reaction
ADK11	97	174600	ADK_cam_18_85_712009_661021_20190727	8210142	2019-07-27	2019-08-21	26	2019	8	21	7	22	22	166	7.5	Moving/feeding/foraging	No reaction
ADK11	97	174600	ADK_cam_18_85_712009_661021_20190727	8210142	2019-07-27	2019-08-21	26	2019	8	21	7	22	24	166	9	Moving/feeding/foraging	No reaction
ADK11	97	174600	ADK_cam_18_85_712009_661021_20190727	8210142	2019-07-27	2019-08-21	26	2019	8	21	7	22	26	166	9	Moving/feeding/foraging	No reaction
ADK11	97	174600	ADK_cam_18_85_712009_661021_20190727	8210142	2019-07-27	2019-08-21	26	2019	8	21	7	22	28	166	9	Moving/feeding/foraging	No reaction
ADK11	97	174600	ADK_cam_18_85_712009_661021_20190727	8210142	2019-07-27	2019-08-21	26	2019	8	21	7	22	30	166	9	Moving/feeding/foraging	No reaction
ADK11	97	174600	ADK_cam_18_85_712009_661021_20190727	8210142	2019-07-27	2019-08-21	26	2019	8	21	7	22	22	167	4.5	Moving/feeding/foraging	No reaction
ADK11	97	174600	ADK_cam_18_85_712009_661021_20190727	8210142	2019-07-27	2019-08-21	26	2019	8	21	7	22	24	167	5.5	Moving/feeding/foraging	No reaction
ADK11	97	174600	ADK_cam_18_85_712009_661021_20190727	8210142	2019-07-27	2019-08-21	26	2019	8	21	7	22	26	167	6.5	Moving/feeding/foraging	No reaction
ADK11	97	174600	ADK_cam_18_85_712009_661021_20190727	8210142	2019-07-27	2019-08-21	26	2019	8	21	7	22	28	167	7.5	Moving/feeding/foraging	No reaction
ADK11	97	174600	ADK_cam_18_85_712009_661021_20190727	8210142	2019-07-27	2019-08-21	26	2019	8	21	7	22	30	167	9	Moving/feeding/foraging	No reaction
ADK11	97	174600	ADK_cam_18_85_712009_661021_20190727	8210142	2019-07-27	2019-08-21	26	2019	8	21	7	22	32	167	9	Moving/feeding/foraging	No reaction
ADK11	97	174600	ADK_cam_18_85_712009_661021_20190727	8210142	2019-07-27	2019-08-21	26	2019	8	21	7	22	34	167	11	Moving/feeding/foraging	No reaction
ADK11	97	174600	ADK_cam_18_85_712009_661021_20190727	8210142	2019-07-27	2019-08-21	26	2019	8	21	7	22	36	167	11	Moving/feeding/foraging	No reaction
ADK11	97	174600	ADK_cam_18_85_712009_661021_20190727	8210143	2019-07-27	2019-08-21	26	2019	8	21	7	23	39	168	5.5	Moving/feeding/foraging	No reaction
ADK11	97	174600	ADK_cam_18_85_712009_661021_20190727	8210143	2019-07-27	2019-08-21	26	2019	8	21	7	23	41	168	5.5	Moving/feeding/foraging	No reaction
ADK11	97	174600	ADK_cam_18_85_712009_661021_20190727	8210143	2019-07-27	2019-08-21	26	2019	8	21	7	23	43	168	5.5	Moving/feeding/foraging	No reaction
ADK11	97	174600	ADK_cam_18_85_712009_661021_20190727	8210143	2019-07-27	2019-08-21	26	2019	8	21	7	23	45	168	5.5	Moving/feeding/foraging	No reaction
ADK11	97	174600	ADK_cam_18_85_712009_661021_20190727	8210143	2019-07-27	2019-08-21	26	2019	8	21	7	23	47	168	5.5	Moving/feeding/foraging	No reaction
ADK11	97	174600	ADK_cam_18_85_712009_661021_20190727	8210143	2019-07-27	2019-08-21	26	2019	8	21	7	23	49	168	5.5	Moving/feeding/foraging	No reaction
ADK11	97	174600	ADK_cam_18_85_712009_661021_20190727	8210143	2019-07-27	2019-08-21	26	2019	8	21	7	23	51	168	5.5	Moving/feeding/foraging	No reaction
ADK11	97	174600	ADK_cam_18_85_712009_661021_20190727	8210143	2019-07-27	2019-08-21	26	2019	8	21	7	23	53	168	5.5	Moving/feeding/foraging	No reaction
ADK11	97	174600	ADK_cam_18_85_712009_661021_20190727	8210143	2019-07-27	2019-08-21	26	2019	8	21	7	23	43	169	4.5	Moving/feeding/foraging	No reaction
ADK11	97	174600	ADK_cam_18_85_712009_661021_20190727	8210143	2019-07-27	2019-08-21	26	2019	8	21	7	23	45	169	5.5	Moving/feeding/foraging	No reaction
ADK11	97	174600	ADK_cam_18_85_712009_661021_20190727	8210143	2019-07-27	2019-08-21	26	2019	8	21	7	23	47	169	6.5	Moving/feeding/foraging	No reaction
ADK11	97	174600	ADK_cam_18_85_712009_661021_20190727	8210143	2019-07-27	2019-08-21	26	2019	8	21	7	23	49	169	7.5	Moving/feeding/foraging	No reaction
ADK11	97	174600	ADK_cam_18_85_712009_661021_20190727	8210143	2019-07-27	2019-08-21	26	2019	8	21	7	23	51	169	9	Moving/feeding/foraging	No reaction
ADK11	97	174600	ADK_cam_18_85_712009_661021_20190727	8210143	2019-07-27	2019-08-21	26	2019	8	21	7	23	53	169	9	Moving/feeding/foraging	No reaction
ADK11	97	174600	ADK_cam_18_85_712009_661021_20190727	8210144	2019-07-27	2019-08-21	26	2019	8	21	7	41	6	170	7.5	Moving/feeding/foraging	No reaction
ADK11	97	174600	ADK_cam_18_85_712009_661021_20190727	8210144	2019-07-27	2019-08-21	26	2019	8	21	7	41	8	170	7.5	Moving/feeding/foraging	No reaction
ADK11	97	174600	ADK_cam_18_85_712009_661021_20190727	8210144	2019-07-27	2019-08-21	26	2019	8	21	7	41	10	170	7.5	Moving/feeding/foraging	No reaction
ADK11	97	174600	ADK_cam_18_85_712009_661021_20190727	8210144	2019-07-27	2019-08-21	26	2019	8	21	7	41	12	170	7.5	Moving/feeding/foraging	No reaction
ADK11	97	174600	ADK_cam_18_85_712009_661021_20190727	8210144	2019-07-27	2019-08-21	26	2019	8	21	7	41	10	171	11	Moving/feeding/foraging	No reaction
ADK11	97	174600	ADK_cam_18_85_712009_661021_20190727	8210144	2019-07-27	2019-08-21	26	2019	8	21	7	41	12	171	11	Moving/feeding/foraging	No reaction
ADK11	97	174600	ADK_cam_18_85_712009_661021_20190727	8210144	2019-07-27	2019-08-21	26	2019	8	21	7	41	14	171	11	Moving/feeding/foraging	No reaction
ADK11	97	174600	ADK_cam_18_85_712009_661021_20190727	8210144	2019-07-27	2019-08-21	26	2019	8	21	7	41	16	171	11	Moving/feeding/foraging	No reaction
ADK11	97	174600	ADK_cam_18_85_712009_661021_20190727	8210144	2019-07-27	2019-08-21	26	2019	8	21	7	41	18	171	11	Moving/feeding/foraging	No reaction
ADK11	97	174600	ADK_cam_18_85_712009_661021_20190727	8210144	2019-07-27	2019-08-21	26	2019	8	21	7	41	20	171	9	Moving/feeding/foraging	No reaction
ADK11	97	174600	ADK_cam_18_85_712009_661021_20190727	8210144	2019-07-27	2019-08-21	26	2019	8	21	7	41	22	171	9	Moving/feeding/foraging	No reaction
ADK11	97	174600	ADK_cam_18_85_712009_661021_20190727	8210145	2019-07-27	2019-08-21	26	2019	8	21	7	43	7	172	2.5	Moving/feeding/foraging	No reaction
ADK11	97	174600	ADK_cam_18_85_712009_661021_20190727	8210145	2019-07-27	2019-08-21	26	2019	8	21	7	43	9	172	2.5	Moving/feeding/foraging	No reaction
ADK11	97	174600	ADK_cam_18_85_712009_661021_20190727	8210145	2019-07-27	2019-08-21	26	2019	8	21	7	43	11	172	2.5	Moving/feeding/foraging	No reaction
ADK11	97	174600	ADK_cam_18_85_712009_661021_20190727	8210145	2019-07-27	2019-08-21	26	2019	8	21	7	43	13	172	2.5	Moving/feeding/foraging	No reaction
ADK11	97	174600	ADK_cam_18_85_712009_661021_20190727	8210145	2019-07-27	2019-08-21	26	2019	8	21	7	43	15	172	2.5	Moving/feeding/foraging	No reaction
ADK11	97	174600	ADK_cam_18_85_712009_661021_20190727	8230157	2019-07-27	2019-08-23	28	2019	8	23	7	19	24	173	5.5	Moving/feeding/foraging	No reaction
ADK11	97	174600	ADK_cam_18_85_712009_661021_20190727	8230157	2019-07-27	2019-08-23	28	2019	8	23	7	19	26	173	6.5	Moving/feeding/foraging	No reaction
ADK11	97	174600	ADK_cam_18_85_712009_661021_20190727	8230157	2019-07-27	2019-08-23	28	2019	8	23	7	19	28	173	6.5	Moving/feeding/foraging	No reaction
ADK11	97	174600	ADK_cam_18_85_712009_661021_20190727	8230157	2019-07-27	2019-08-23	28	2019	8	23	7	19	24	174	11	Moving/feeding/foraging	No reaction
ADK11	97	174600	ADK_cam_18_85_712009_661021_20190727	8230157	2019-07-27	2019-08-23	28	2019	8	23	7	19	26	174	11	Moving/feeding/foraging	No reaction
ADK11	97	174600	ADK_cam_18_85_712009_661021_20190727	8230157	2019-07-27	2019-08-23	28	2019	8	23	7	19	28	174	11	Moving/feeding/foraging	No reaction
ADK11	97	174600	ADK_cam_18_85_712009_661021_20190727	8230157	2019-07-27	2019-08-23	28	2019	8	23	7	19	30	174	11	Moving/feeding/foraging	No reaction
ADK11	97	174600	ADK_cam_18_85_712009_661021_20190727	8230157	2019-07-27	2019-08-23	28	2019	8	23	7	19	32	174	11	Moving/feeding/foraging	No reaction
ADK11	97	174600	ADK_cam_18_85_712009_661021_20190727	8230157	2019-07-27	2019-08-23	28	2019	8	23	7	19	34	174	11	Moving/feeding/foraging	No reaction
ADK11	97	174600	ADK_cam_18_85_712009_661021_20190727	8230157	2019-07-27	2019-08-23	28	2019	8	23	7	19	36	174	11	Moving/feeding/foraging	No reaction
ADK11	97	174600	ADK_cam_18_85_712009_661021_20190727	8230157	2019-07-27	2019-08-23	28	2019	8	23	7	19	38	174	11	Moving/feeding/foraging	No reaction
ADK11	97	174600	ADK_cam_18_85_712009_661021_20190727	8230158	2019-07-27	2019-08-23	28	2019	8	23	7	27	29	175	1.5	Moving/feeding/foraging	No reaction
ADK11	97	174600	ADK_cam_18_85_712009_661021_20190727	8280186	2019-07-27	2019-08-28	33	2019	8	28	7	48	5	176	3.5	Moving/feeding/foraging	No reaction
ADK11	97	174600	ADK_cam_18_85_712009_661021_20190727	8280186	2019-07-27	2019-08-28	33	2019	8	28	7	48	13	177	1.5	Moving/feeding/foraging	No reaction
ADK11	97	174600	ADK_cam_18_85_712009_661021_20190727	8280187	2019-07-27	2019-08-28	33	2019	8	28	7	48	16	178	2.5	Moving/feeding/foraging	No reaction
ADK11	97	174600	ADK_cam_18_85_712009_661021_20190727	8280187	2019-07-27	2019-08-28	33	2019	8	28	7	48	18	178	2.5	Moving/feeding/foraging	No reaction
ADK11	97	174600	ADK_cam_18_85_712009_661021_20190727	8280188	2019-07-27	2019-08-28	33	2019	8	28	7	48	27	179	2.5	Moving/feeding/foraging	No reaction
ADK11	97	174600	ADK_cam_18_85_712009_661021_20190727	8280188	2019-07-27	2019-08-28	33	2019	8	28	7	48	29	179	2.5	Moving/feeding/foraging	No reaction
ADK11	97	174600	ADK_cam_18_85_712009_661021_20190727	8280190	2019-07-27	2019-08-28	33	2019	8	28	7	51	11	180	5.5	Moving/feeding/foraging	No reaction
ADK11	97	174600	ADK_cam_18_85_712009_661021_20190727	8280190	2019-07-27	2019-08-28	33	2019	8	28	7	51	13	180	5.5	Moving/feeding/foraging	No reaction
ADK11	97	174600	ADK_cam_18_85_712009_661021_20190727	8280190	2019-07-27	2019-08-28	33	2019	8	28	7	51	15	180	5.5	Moving/feeding/foraging	No reaction
ADK11	97	174600	ADK_cam_18_85_712009_661021_20190727	8280190	2019-07-27	2019-08-28	33	2019	8	28	7	51	17	180	5.5	Moving/feeding/foraging	No reaction
ADK11	97	174600	ADK_cam_18_85_712009_661021_20190727	8280190	2019-07-27	2019-08-28	33	2019	8	28	7	51	19	180	5.5	Moving/feeding/foraging	No reaction
ADK11	97	174600	ADK_cam_18_85_712009_661021_20190727	8280191	2019-07-27	2019-08-28	33	2019	8	28	7	51	26	181	5.5	Moving/feeding/foraging	No reaction
ADK11	97	174600	ADK_cam_18_85_712009_661021_20190727	8280191	2019-07-27	2019-08-28	33	2019	8	28	7	51	28	181	5.5	Moving/feeding/foraging	No reaction
ADK11	97	174600	ADK_cam_18_85_712009_661021_20190727	8290194	2019-07-27	2019-08-29	34	2019	8	29	7	19	9	182	2.5	Moving/feeding/foraging	No reaction
ADK11	97	174600	ADK_cam_18_85_712009_661021_20190727	8290194	2019-07-27	2019-08-29	34	2019	8	29	7	19	11	182	2.5	Moving/feeding/foraging	No reaction
ADK11	97	174600	ADK_cam_18_85_712009_661021_20190727	8290194	2019-07-27	2019-08-29	34	2019	8	29	7	19	13	182	2.5	Moving/feeding/foraging	No reaction
ADK11	97	174600	ADK_cam_18_85_712009_661021_20190727	8290194	2019-07-27	2019-08-29	34	2019	8	29	7	19	15	182	2.5	Moving/feeding/foraging	No reaction
ADK11	97	174600	ADK_cam_18_85_712009_661021_20190727	8290194	2019-07-27	2019-08-29	34	2019	8	29	7	19	17	182	2.5	Moving/feeding/foraging	No reaction
ADK11	97	174600	ADK_cam_18_85_712009_661021_20190727	8290195	2019-07-27	2019-08-29	34	2019	8	29	7	19	22	183	2.5	Moving/feeding/foraging	No reaction
ADK11	97	174600	ADK_cam_18_85_712009_661021_20190727	8290195	2019-07-27	2019-08-29	34	2019	8	29	7	19	24	183	2.5	Moving/feeding/foraging	No reaction
ADK11	97	174600	ADK_cam_18_85_712009_661021_20190727	8290195	2019-07-27	2019-08-29	34	2019	8	29	7	19	22	184	2.5	Moving/feeding/foraging	No reaction
ADK11	97	174600	ADK_cam_18_85_712009_661021_20190727	8290195	2019-07-27	2019-08-29	34	2019	8	29	7	19	24	184	2.5	Moving/feeding/foraging	No reaction
ADK11	97	174600	ADK_cam_18_85_712009_661021_20190727	8290195	2019-07-27	2019-08-29	34	2019	8	29	7	19	26	184	2.5	Moving/feeding/foraging	No reaction
ADK11	97	174600	ADK_cam_18_85_712009_661021_20190727	8300208	2019-07-27	2019-08-30	35	2019	8	30	7	56	2	185	9	Moving/feeding/foraging	No reaction
ADK11	97	174600	ADK_cam_18_85_712009_661021_20190727	8300208	2019-07-27	2019-08-30	35	2019	8	30	7	56	4	185	9	Moving/feeding/foraging	No reaction
ADK11	97	174600	ADK_cam_18_85_712009_661021_20190727	8300208	2019-07-27	2019-08-30	35	2019	8	30	7	56	6	185	9	Moving/feeding/foraging	No reaction
ADK11	97	174600	ADK_cam_18_85_712009_661021_20190727	8300208	2019-07-27	2019-08-30	35	2019	8	30	7	56	8	185	9	Moving/feeding/foraging	No reaction
ADK11	97	174600	ADK_cam_18_85_712009_661021_20190727	8300208	2019-07-27	2019-08-30	35	2019	8	30	7	56	10	185	9	Moving/feeding/foraging	No reaction
ADK11	97	174600	ADK_cam_18_85_712009_661021_20190727	8300208	2019-07-27	2019-08-30	35	2019	8	30	7	56	2	186	5.5	Moving/feeding/foraging	No reaction
ADK11	97	174600	ADK_cam_18_85_712009_661021_20190727	8300208	2019-07-27	2019-08-30	35	2019	8	30	7	56	4	186	5.5	Moving/feeding/foraging	No reaction
ADK11	97	174600	ADK_cam_18_85_712009_661021_20190727	8300208	2019-07-27	2019-08-30	35	2019	8	30	7	56	6	186	5.5	Moving/feeding/foraging	No reaction
ADK11	97	174600	ADK_cam_18_85_712009_661021_20190727	8300208	2019-07-27	2019-08-30	35	2019	8	30	7	56	8	186	4.5	Moving/feeding/foraging	No reaction
ADK11	97	174600	ADK_cam_18_85_712009_661021_20190727	8300208	2019-07-27	2019-08-30	35	2019	8	30	7	56	10	186	4.5	Moving/feeding/foraging	No reaction
ADK11	97	174600	ADK_cam_18_85_712009_661021_20190727	8310222	2019-07-27	2019-08-31	36	2019	8	31	7	6	1	187	1.5	Moving/feeding/foraging	No reaction
ADK11	97	174600	ADK_cam_18_85_712009_661021_20190727	8310223	2019-07-27	2019-08-31	36	2019	8	31	7	31	4	188	3.5	Moving/feeding/foraging	No reaction
ADK11	97	174600	ADK_cam_18_85_712009_661021_20190727	8310223	2019-07-27	2019-08-31	36	2019	8	31	7	31	6	188	2.5	Moving/feeding/foraging	No reaction
ADK11	97	174600	ADK_cam_18_85_712009_661021_20190727	8310223	2019-07-27	2019-08-31	36	2019	8	31	7	31	8	188	2.5	Moving/feeding/foraging	No reaction
ADK11	97	174600	ADK_cam_18_85_712009_661021_20190727	8310223	2019-07-27	2019-08-31	36	2019	8	31	7	31	10	188	2.5	Moving/feeding/foraging	No reaction
ADK11	97	174600	ADK_cam_18_85_712009_661021_20190727	8310225	2019-07-27	2019-08-31	36	2019	8	31	7	34	52	189	7.5	Moving/feeding/foraging	No reaction
ADK11	97	174600	ADK_cam_18_85_712009_661021_20190727	8310225	2019-07-27	2019-08-31	36	2019	8	31	7	34	54	189	7.5	Moving/feeding/foraging	No reaction
ADK11	97	174600	ADK_cam_18_85_712009_661021_20190727	8310225	2019-07-27	2019-08-31	36	2019	8	31	7	34	56	189	9	Moving/feeding/foraging	No reaction
ADK11	97	174600	ADK_cam_18_85_712009_661021_20190727	8310225	2019-07-27	2019-08-31	36	2019	8	31	7	34	58	189	9	Moving/feeding/foraging	No reaction
ADK11	97	174600	ADK_cam_18_85_712009_661021_20190727	9020239	2019-07-27	2019-09-02	38	2019	9	2	7	37	54	190	4.5	Moving/feeding/foraging	No reaction
ADK11	97	174600	ADK_cam_18_85_712009_661021_20190727	9020239	2019-07-27	2019-09-02	38	2019	9	2	7	37	56	190	4.5	Moving/feeding/foraging	No reaction
ADK11	97	174600	ADK_cam_18_85_712009_661021_20190727	9020239	2019-07-27	2019-09-02	38	2019	9	2	7	37	58	190	4.5	Moving/feeding/foraging	No reaction
ADK11	97	174600	ADK_cam_18_85_712009_661021_20190727	9020239	2019-07-27	2019-09-02	38	2019	9	2	7	37	54	191	7.5	Moving/feeding/foraging	No reaction
ADK11	97	174600	ADK_cam_18_85_712009_661021_20190727	9020239	2019-07-27	2019-09-02	38	2019	9	2	7	37	56	191	7.5	Moving/feeding/foraging	No reaction
ADK11	97	174600	ADK_cam_18_85_712009_661021_20190727	9020239	2019-07-27	2019-09-02	38	2019	9	2	7	37	58	191	7.5	Moving/feeding/foraging	No reaction
ADK11	97	174600	ADK_cam_18_85_712009_661021_20190727	9020239	2019-07-27	2019-09-02	38	2019	9	2	7	37	56	192	4.5	Moving/feeding/foraging	No reaction
ADK11	97	174600	ADK_cam_18_85_712009_661021_20190727	9020239	2019-07-27	2019-09-02	38	2019	9	2	7	37	58	192	4.5	Moving/feeding/foraging	No reaction
ADK11	97	174600	ADK_cam_18_85_712009_661021_20190727	9020240	2019-07-27	2019-09-02	38	2019	9	2	7	38	4	193	4.5	Moving/feeding/foraging	No reaction
ADK11	97	174600	ADK_cam_18_85_712009_661021_20190727	9020240	2019-07-27	2019-09-02	38	2019	9	2	7	38	6	193	3.5	Moving/feeding/foraging	No reaction
ADK11	97	174600	ADK_cam_18_85_712009_661021_20190727	9020240	2019-07-27	2019-09-02	38	2019	9	2	7	38	8	193	3.5	Moving/feeding/foraging	No reaction
ADK11	97	174600	ADK_cam_18_85_712009_661021_20190727	9020240	2019-07-27	2019-09-02	38	2019	9	2	7	38	4	194	6.5	Moving/feeding/foraging	No reaction
ADK11	97	174600	ADK_cam_18_85_712009_661021_20190727	9020240	2019-07-27	2019-09-02	38	2019	9	2	7	38	6	194	6.5	Moving/feeding/foraging	No reaction
ADK11	97	174600	ADK_cam_18_85_712009_661021_20190727	9020240	2019-07-27	2019-09-02	38	2019	9	2	7	38	8	194	6.5	Moving/feeding/foraging	No reaction
ADK11	97	174600	ADK_cam_18_85_712009_661021_20190727	9020241	2019-07-27	2019-09-02	38	2019	9	2	7	38	14	195	2.5	Moving/feeding/foraging	No reaction
ADK11	97	174600	ADK_cam_18_85_712009_661021_20190727	9040269	2019-07-27	2019-09-04	40	2019	9	4	7	6	26	196	11	Moving/feeding/foraging	No reaction
ADK11	97	174600	ADK_cam_18_85_712009_661021_20190727	9040269	2019-07-27	2019-09-04	40	2019	9	4	7	6	28	196	11	Moving/feeding/foraging	No reaction
ADK11	97	174600	ADK_cam_18_85_712009_661021_20190727	9040269	2019-07-27	2019-09-04	40	2019	9	4	7	6	30	196	11	Moving/feeding/foraging	No reaction
ADK11	97	174600	ADK_cam_18_85_712009_661021_20190727	9040270	2019-07-27	2019-09-04	40	2019	9	4	7	15	43	197	3.5	Moving/feeding/foraging	No reaction
ADK11	97	174600	ADK_cam_18_85_712009_661021_20190727	9040270	2019-07-27	2019-09-04	40	2019	9	4	7	15	45	197	3.5	Moving/feeding/foraging	No reaction
ADK11	97	174600	ADK_cam_18_85_712009_661021_20190727	9040270	2019-07-27	2019-09-04	40	2019	9	4	7	15	47	197	3.5	Moving/feeding/foraging	No reaction
ADK11	97	174600	ADK_cam_18_85_712009_661021_20190727	9040271	2019-07-27	2019-09-04	40	2019	9	4	7	15	52	198	2.5	Moving/feeding/foraging	No reaction
ADK11	97	174600	ADK_cam_18_85_712009_661021_20190727	9040271	2019-07-27	2019-09-04	40	2019	9	4	7	15	54	198	2.5	Moving/feeding/foraging	No reaction
ADK11	97	174600	ADK_cam_18_85_712009_661021_20190727	9040271	2019-07-27	2019-09-04	40	2019	9	4	7	15	56	198	2.5	Moving/feeding/foraging	No reaction
ADK11	97	174600	ADK_cam_18_85_712009_661021_20190727	9040271	2019-07-27	2019-09-04	40	2019	9	4	7	15	52	199	4.5	Moving/feeding/foraging	No reaction
ADK11	97	174600	ADK_cam_18_85_712009_661021_20190727	9040271	2019-07-27	2019-09-04	40	2019	9	4	7	15	54	199	4.5	Moving/feeding/foraging	No reaction
ADK11	97	174600	ADK_cam_18_85_712009_661021_20190727	9040271	2019-07-27	2019-09-04	40	2019	9	4	7	15	56	199	4.5	Moving/feeding/foraging	No reaction
ADK11	97	174600	ADK_cam_18_85_712009_661021_20190727	9040272	2019-07-27	2019-09-04	40	2019	9	4	7	16	4	200	5.5	Moving/feeding/foraging	No reaction
ADK11	97	174600	ADK_cam_18_85_712009_661021_20190727	9040272	2019-07-27	2019-09-04	40	2019	9	4	7	16	6	200	5.5	Moving/feeding/foraging	No reaction
ADK11	97	174600	ADK_cam_18_85_712009_661021_20190727	9040272	2019-07-27	2019-09-04	40	2019	9	4	7	16	8	200	5.5	Moving/feeding/foraging	No reaction
ADK11	97	174600	ADK_cam_18_85_712009_661021_20190727	9040272	2019-07-27	2019-09-04	40	2019	9	4	7	16	5	201	1.5	Moving/feeding/foraging	No reaction
ADK11	97	174600	ADK_cam_18_85_712009_661021_20190727	9040272	2019-07-27	2019-09-04	40	2019	9	4	7	16	7	201	1.5	Moving/feeding/foraging	No reaction
ADK11	97	174600	ADK_cam_18_85_712009_661021_20190727	9040272	2019-07-27	2019-09-04	40	2019	9	4	7	16	9	201	1.5	Moving/feeding/foraging	No reaction
ADK11	97	174600	ADK_cam_18_85_712009_661021_20190727	9040274	2019-07-27	2019-09-04	40	2019	9	4	7	16	23	202	2.5	Moving/feeding/foraging	No reaction
ADK11	97	174600	ADK_cam_18_85_712009_661021_20190727	9040275	2019-07-27	2019-09-04	40	2019	9	4	7	19	8	203	5.5	Moving/feeding/foraging	No reaction
ADK11	97	174600	ADK_cam_18_85_712009_661021_20190727	9040275	2019-07-27	2019-09-04	40	2019	9	4	7	19	10	203	5.5	Moving/feeding/foraging	No reaction
ADK11	97	174600	ADK_cam_18_85_712009_661021_20190727	9040275	2019-07-27	2019-09-04	40	2019	9	4	7	19	12	203	5.5	Moving/feeding/foraging	No reaction
ADK11	97	174600	ADK_cam_18_85_712009_661021_20190727	9130348	2019-07-27	2019-09-13	49	2019	9	13	7	24	4	204	2.5	Moving/feeding/foraging	No reaction
ADK11	97	174600	ADK_cam_18_85_712009_661021_20190727	9130348	2019-07-27	2019-09-13	49	2019	9	13	7	24	6	204	2.5	Moving/feeding/foraging	No reaction
ADK11	97	174600	ADK_cam_18_85_712009_661021_20190727	9130348	2019-07-27	2019-09-13	49	2019	9	13	7	24	8	204	3.5	Moving/feeding/foraging	No reaction
ADK11	97	174600	ADK_cam_18_85_712009_661021_20190727	9130350	2019-07-27	2019-09-13	49	2019	9	13	7	24	41	205	1.5	Moving/feeding/foraging	No reaction
ADK11	97	174600	ADK_cam_18_85_712009_661021_20190727	9150356	2019-07-27	2019-09-15	51	2019	9	15	7	28	16	206	2.5	Moving/feeding/foraging	No reaction
ADK11	97	174600	ADK_cam_18_85_712009_661021_20190727	9150356	2019-07-27	2019-09-15	51	2019	9	15	7	28	18	206	3.5	Moving/feeding/foraging	No reaction
ADK11	97	174600	ADK_cam_18_85_712009_661021_20190727	9150357	2019-07-27	2019-09-15	51	2019	9	15	7	28	40	207	3.5	Moving/feeding/foraging	No reaction
ADK11	97	174600	ADK_cam_18_85_712009_661021_20190727	9150358	2019-07-27	2019-09-15	51	2019	9	15	7	28	51	208	2.5	Moving/feeding/foraging	No reaction
ADK11	97	174600	ADK_cam_18_85_712009_661021_20190727	9150359	2019-07-27	2019-09-15	51	2019	9	15	7	29	5	209	2.5	Moving/feeding/foraging	No reaction
ADK11	97	174600	ADK_cam_18_85_712009_661021_20190727	9150359	2019-07-27	2019-09-15	51	2019	9	15	7	29	7	209	2.5	Moving/feeding/foraging	No reaction
ADK11	97	174600	ADK_cam_18_85_712009_661021_20190727	9150359	2019-07-27	2019-09-15	51	2019	9	15	7	29	9	209	2.5	Moving/feeding/foraging	No reaction
ADK11	97	174600	ADK_cam_18_85_712009_661021_20190727	9150359	2019-07-27	2019-09-15	51	2019	9	15	7	29	7	210	3.5	Moving/feeding/foraging	No reaction
ADK11	97	174600	ADK_cam_18_85_712009_661021_20190727	9150360	2019-07-27	2019-09-15	51	2019	9	15	7	29	13	211	2.5	Moving/feeding/foraging	No reaction
ADK11	97	174600	ADK_cam_18_85_712009_661021_20190727	9160368	2019-07-27	2019-09-16	52	2019	9	16	7	25	29	212	3.5	Moving/feeding/foraging	No reaction
ADK11	97	174600	ADK_cam_18_85_712009_661021_20190727	9160368	2019-07-27	2019-09-16	52	2019	9	16	7	25	31	212	3.5	Moving/feeding/foraging	No reaction
ADK11	97	174600	ADK_cam_18_85_712009_661021_20190727	9160368	2019-07-27	2019-09-16	52	2019	9	16	7	25	33	212	3.5	Moving/feeding/foraging	No reaction
ADK11	97	174600	ADK_cam_18_85_712009_661021_20190727	9160368	2019-07-27	2019-09-16	52	2019	9	16	7	25	29	213	2.5	Moving/feeding/foraging	No reaction
ADK11	97	174600	ADK_cam_18_85_712009_661021_20190727	9160368	2019-07-27	2019-09-16	52	2019	9	16	7	25	31	213	2.5	Moving/feeding/foraging	No reaction
ADK11	97	174600	ADK_cam_18_85_712009_661021_20190727	9160369	2019-07-27	2019-09-16	52	2019	9	16	7	27	23	214	1.5	Moving/feeding/foraging	No reaction
ADK11	97	174600	ADK_cam_18_85_712009_661021_20190727	9160370	2019-07-27	2019-09-16	52	2019	9	16	7	32	4	215	9	Moving/feeding/foraging	No reaction
ADK11	97	174600	ADK_cam_18_85_712009_661021_20190727	9190380	2019-07-27	2019-09-19	55	2019	9	19	7	11	47	216	11	Moving/feeding/foraging	No reaction
ADK11	97	174600	ADK_cam_18_85_712009_661021_20190727	9190380	2019-07-27	2019-09-19	55	2019	9	19	7	11	49	216	11	Moving/feeding/foraging	No reaction
ADK11	97	174600	ADK_cam_18_85_712009_661021_20190727	9190380	2019-07-27	2019-09-19	55	2019	9	19	7	11	51	216	11	Moving/feeding/foraging	No reaction
ADK11	97	174600	ADK_cam_18_85_712009_661021_20190727	9250406	2019-07-27	2019-09-25	61	2019	9	25	7	26	2	217	2.5	Moving/feeding/foraging	No reaction
ADK11	97	174600	ADK_cam_18_85_712009_661021_20190727	9250406	2019-07-27	2019-09-25	61	2019	9	25	7	26	4	217	2.5	Moving/feeding/foraging	No reaction
ADK11	97	174600	ADK_cam_18_85_712009_661021_20190727	9250406	2019-07-27	2019-09-25	61	2019	9	25	7	26	6	217	2.5	Moving/feeding/foraging	No reaction
ADK11	97	174600	ADK_cam_18_85_712009_661021_20190727	9260411	2019-07-27	2019-09-26	62	2019	9	26	7	4	20	218	5.5	Moving/feeding/foraging	No reaction
ADK11	97	174600	ADK_cam_18_85_712009_661021_20190727	9260411	2019-07-27	2019-09-26	62	2019	9	26	7	4	22	218	5.5	Moving/feeding/foraging	No reaction
ADK11	97	174600	ADK_cam_18_85_712009_661021_20190727	9260411	2019-07-27	2019-09-26	62	2019	9	26	7	4	24	218	5.5	Moving/feeding/foraging	No reaction
ADK11	97	174600	ADK_cam_18_85_712009_661021_20190727	9260412	2019-07-27	2019-09-26	62	2019	9	26	7	4	27	219	13.5	Moving/feeding/foraging	No reaction
ADK11	97	174600	ADK_cam_18_85_712009_661021_20190727	9260412	2019-07-27	2019-09-26	62	2019	9	26	7	4	29	219	13.5	Moving/feeding/foraging	No reaction
ADK11	97	174600	ADK_cam_18_85_712009_661021_20190727	9260412	2019-07-27	2019-09-26	62	2019	9	26	7	4	31	219	13.5	Moving/feeding/foraging	No reaction
ADK11	97	174600	ADK_cam_18_85_712009_661021_20190727	9270415	2019-07-27	2019-09-27	63	2019	9	27	7	14	11	220	2.5	Moving/feeding/foraging	No reaction
ADK11	97	174600	ADK_cam_18_85_712009_661021_20190727	9270415	2019-07-27	2019-09-27	63	2019	9	27	7	14	13	220	2.5	Moving/feeding/foraging	No reaction
ADK11	97	174600	ADK_cam_18_85_712009_661021_20190727	9270415	2019-07-27	2019-09-27	63	2019	9	27	7	14	15	220	2.5	Moving/feeding/foraging	No reaction
ADK11	97	174600	ADK_cam_18_85_712009_661021_20190727	9280423	2019-07-27	2019-09-28	64	2019	9	28	7	6	10	221	7.5	Moving/feeding/foraging	No reaction
ADK11	97	174600	ADK_cam_18_85_712009_661021_20190727	9300431	2019-07-27	2019-09-30	66	2019	9	30	7	4	36	222	2.5	Moving/feeding/foraging	No reaction
ADK11	97	174600	ADK_cam_18_85_712009_661021_20190727	9300431	2019-07-27	2019-09-30	66	2019	9	30	7	4	38	222	2.5	Moving/feeding/foraging	No reaction
ADK11	97	174600	ADK_cam_18_85_712009_661021_20190727	9300431	2019-07-27	2019-09-30	66	2019	9	30	7	4	40	222	2.5	Moving/feeding/foraging	No reaction
ADK11	97	174600	ADK_cam_18_85_712009_661021_20190727	9300432	2019-07-27	2019-09-30	66	2019	9	30	7	4	48	223	2.5	Moving/feeding/foraging	No reaction
ADK11	97	174600	ADK_cam_18_85_712009_661021_20190727	9300432	2019-07-27	2019-09-30	66	2019	9	30	7	4	50	223	2.5	Moving/feeding/foraging	No reaction
ADK11	97	174600	ADK_cam_18_85_712009_661021_20190727	9300432	2019-07-27	2019-09-30	66	2019	9	30	7	4	52	223	2.5	Moving/feeding/foraging	No reaction
ADK11	97	174600	ADK_cam_18_85_712009_661021_20190727	9300433	2019-07-27	2019-09-30	66	2019	9	30	7	5	38	224	2.5	Moving/feeding/foraging	No reaction
ADK11	97	174600	ADK_cam_18_85_712009_661021_20190727	9300433	2019-07-27	2019-09-30	66	2019	9	30	7	5	40	224	2.5	Moving/feeding/foraging	No reaction
ADK11	97	174600	ADK_cam_18_85_712009_661021_20190727	9300433	2019-07-27	2019-09-30	66	2019	9	30	7	5	42	224	2.5	Moving/feeding/foraging	No reaction
ADK11	97	174600	ADK_cam_18_85_712009_661021_20190727	9300433	2019-07-27	2019-09-30	66	2019	9	30	7	5	38	225	5.5	Moving/feeding/foraging	No reaction
ADK11	97	174600	ADK_cam_18_85_712009_661021_20190727	9300433	2019-07-27	2019-09-30	66	2019	9	30	7	5	40	225	5.5	Moving/feeding/foraging	No reaction
ADK11	97	174600	ADK_cam_18_85_712009_661021_20190727	9300433	2019-07-27	2019-09-30	66	2019	9	30	7	5	42	225	5.5	Moving/feeding/foraging	No reaction
ADK11	97	174600	ADK_cam_18_85_712009_661021_20190727	9300433	2019-07-27	2019-09-30	66	2019	9	30	7	5	38	226	2.5	Moving/feeding/foraging	No reaction
ADK11	97	174600	ADK_cam_18_85_712009_661021_20190727	9300433	2019-07-27	2019-09-30	66	2019	9	30	7	5	40	226	2.5	Moving/feeding/foraging	No reaction
ADK11	97	174600	ADK_cam_18_85_712009_661021_20190727	9300433	2019-07-27	2019-09-30	66	2019	9	30	7	5	42	226	2.5	Moving/feeding/foraging	No reaction
ADK11	97	174600	ADK_cam_18_85_712009_661021_20190727	9300434	2019-07-27	2019-09-30	66	2019	9	30	7	5	46	227	3.5	Moving/feeding/foraging	No reaction
ADK11	97	174600	ADK_cam_18_85_712009_661021_20190727	9300434	2019-07-27	2019-09-30	66	2019	9	30	7	5	46	228	1.5	Moving/feeding/foraging	No reaction
ADK11	97	174600	ADK_cam_18_85_712009_661021_20190727	10040452	2019-07-27	2019-10-04	70	2019	10	4	7	23	0	229	2.5	Moving/feeding/foraging	No reaction
ADK11	97	174600	ADK_cam_18_85_712009_661021_20190727	10040452	2019-07-27	2019-10-04	70	2019	10	4	7	23	2	229	2.5	Moving/feeding/foraging	No reaction
ADK11	97	174600	ADK_cam_18_85_712009_661021_20190727	10040452	2019-07-27	2019-10-04	70	2019	10	4	7	23	4	229	2.5	Moving/feeding/foraging	No reaction
ADK11	97	174600	ADK_cam_18_85_712009_661021_20190727	10040453	2019-07-27	2019-10-04	70	2019	10	4	7	23	42	230	2.5	Moving/feeding/foraging	No reaction
ADK11	97	174600	ADK_cam_18_85_712009_661021_20190727	10040453	2019-07-27	2019-10-04	70	2019	10	4	7	23	44	230	2.5	Moving/feeding/foraging	No reaction
ADK11	97	174600	ADK_cam_18_85_712009_661021_20190727	10040454	2019-07-27	2019-10-04	70	2019	10	4	7	23	59	231	1.5	Moving/feeding/foraging	No reaction
ADK11	97	174600	ADK_cam_18_85_712009_661021_20190727	10040454	2019-07-27	2019-10-04	70	2019	10	4	7	23	59	232	3.5	Moving/feeding/foraging	No reaction
ADK11	97	174600	ADK_cam_18_85_712009_661021_20190727	10040454	2019-07-27	2019-10-04	70	2019	10	4	7	24	1	232	3.5	Moving/feeding/foraging	No reaction
ADK11	97	174600	ADK_cam_18_85_712009_661021_20190727	10040454	2019-07-27	2019-10-04	70	2019	10	4	7	24	3	232	3.5	Moving/feeding/foraging	No reaction
ADK11	97	174600	ADK_cam_18_85_712009_661021_20190727	10040454	2019-07-27	2019-10-04	70	2019	10	4	7	24	0	233	2.5	Moving/feeding/foraging	No reaction
ADK11	97	174600	ADK_cam_18_85_712009_661021_20190727	10040454	2019-07-27	2019-10-04	70	2019	10	4	7	24	2	233	2.5	Moving/feeding/foraging	No reaction
ADK11	97	174600	ADK_cam_18_85_712009_661021_20190727	10050461	2019-07-27	2019-10-05	71	2019	10	5	7	35	50	234	6.5	Moving/feeding/foraging	No reaction
ADK11	97	174600	ADK_cam_18_85_712009_661021_20190727	10050461	2019-07-27	2019-10-05	71	2019	10	5	7	35	52	234	6.5	Moving/feeding/foraging	No reaction
ADK11	97	174600	ADK_cam_18_85_712009_661021_20190727	10050461	2019-07-27	2019-10-05	71	2019	10	5	7	35	54	234	6.5	Moving/feeding/foraging	No reaction
ADK11	97	174600	ADK_cam_18_85_712009_661021_20190727	10050461	2019-07-27	2019-10-05	71	2019	10	5	7	35	56	234	6.5	Moving/feeding/foraging	No reaction
ADK11	97	174600	ADK_cam_18_85_712009_661021_20190727	10050461	2019-07-27	2019-10-05	71	2019	10	5	7	35	58	234	6.5	Moving/feeding/foraging	No reaction
ADK11	97	174600	ADK_cam_18_85_712009_661021_20190727	10050461	2019-07-27	2019-10-05	71	2019	10	5	7	36	0	234	6.5	Moving/feeding/foraging	No reaction
ADK11	97	174600	ADK_cam_18_85_712009_661021_20190727	10050461	2019-07-27	2019-10-05	71	2019	10	5	7	36	2	234	5.5	Moving/feeding/foraging	No reaction
ADK11	97	174600	ADK_cam_18_85_712009_661021_20190727	10050461	2019-07-27	2019-10-05	71	2019	10	5	7	36	4	234	5.5	Moving/feeding/foraging	No reaction
ADK11	97	174600	ADK_cam_18_85_712009_661021_20190727	10050461	2019-07-27	2019-10-05	71	2019	10	5	7	36	6	234	5.5	Moving/feeding/foraging	No reaction
ADK11	97	174600	ADK_cam_18_85_712009_661021_20190727	10050461	2019-07-27	2019-10-05	71	2019	10	5	7	36	8	234	5.5	Moving/feeding/foraging	No reaction
ADK11	97	174600	ADK_cam_18_85_712009_661021_20190727	10050461	2019-07-27	2019-10-05	71	2019	10	5	7	36	10	234	5.5	Moving/feeding/foraging	No reaction
ADK11	97	174600	ADK_cam_18_85_712009_661021_20190727	10050461	2019-07-27	2019-10-05	71	2019	10	5	7	36	12	234	5.5	Moving/feeding/foraging	No reaction
ADK11	97	174600	ADK_cam_18_85_712009_661021_20190727	10050461	2019-07-27	2019-10-05	71	2019	10	5	7	36	14	234	5.5	Moving/feeding/foraging	No reaction
ADK11	97	174600	ADK_cam_18_85_712009_661021_20190727	10050461	2019-07-27	2019-10-05	71	2019	10	5	7	36	16	234	5.5	Moving/feeding/foraging	No reaction
ADK11	97	174600	ADK_cam_18_85_712009_661021_20190727	10050461	2019-07-27	2019-10-05	71	2019	10	5	7	36	18	234	5.5	Moving/feeding/foraging	No reaction
ADK11	97	174600	ADK_cam_18_85_712009_661021_20190727	10050461	2019-07-27	2019-10-05	71	2019	10	5	7	36	20	234	5.5	Moving/feeding/foraging	No reaction
ADK11	97	174600	ADK_cam_18_85_712009_661021_20190727	10050461	2019-07-27	2019-10-05	71	2019	10	5	7	36	22	234	5.5	Moving/feeding/foraging	No reaction
ADK11	97	174600	ADK_cam_18_85_712009_661021_20190727	10050461	2019-07-27	2019-10-05	71	2019	10	5	7	36	24	234	5.5	Moving/feeding/foraging	No reaction
ADK11	97	174600	ADK_cam_18_85_712009_661021_20190727	10050461	2019-07-27	2019-10-05	71	2019	10	5	7	36	26	234	5.5	Moving/feeding/foraging	No reaction
ADK11	97	174600	ADK_cam_18_85_712009_661021_20190727	10050461	2019-07-27	2019-10-05	71	2019	10	5	7	36	28	234	5.5	Moving/feeding/foraging	No reaction
ADK11	97	174600	ADK_cam_18_85_712009_661021_20190727	10050461	2019-07-27	2019-10-05	71	2019	10	5	7	36	30	234	5.5	Moving/feeding/foraging	No reaction
ADK11	97	174600	ADK_cam_18_85_712009_661021_20190727	10050461	2019-07-27	2019-10-05	71	2019	10	5	7	36	32	234	5.5	Moving/feeding/foraging	No reaction
ADK11	97	174600	ADK_cam_18_85_712009_661021_20190727	10050461	2019-07-27	2019-10-05	71	2019	10	5	7	36	44	235	4.5	Moving/feeding/foraging	No reaction
ADK11	97	174600	ADK_cam_18_85_712009_661021_20190727	10050461	2019-07-27	2019-10-05	71	2019	10	5	7	36	46	235	3.5	Moving/feeding/foraging	No reaction
ADK11	97	174600	ADK_cam_18_85_712009_661021_20190727	10050461	2019-07-27	2019-10-05	71	2019	10	5	7	36	48	235	3.5	Moving/feeding/foraging	No reaction
ADK11	97	174600	ADK_cam_18_85_712009_661021_20190727	10050462	2019-07-27	2019-10-05	71	2019	10	5	7	37	0	236	3.5	Moving/feeding/foraging	No reaction
ADK11	97	174600	ADK_cam_18_85_712009_661021_20190727	10050462	2019-07-27	2019-10-05	71	2019	10	5	7	37	2	236	3.5	Moving/feeding/foraging	No reaction
ADK11	97	174600	ADK_cam_18_85_712009_661021_20190727	10050462	2019-07-27	2019-10-05	71	2019	10	5	7	37	4	236	3.5	Moving/feeding/foraging	No reaction
ADK11	97	174600	ADK_cam_18_85_712009_661021_20190727	10050462	2019-07-27	2019-10-05	71	2019	10	5	7	37	6	236	3.5	Moving/feeding/foraging	No reaction
ADK11	97	174600	ADK_cam_18_85_712009_661021_20190727	10050462	2019-07-27	2019-10-05	71	2019	10	5	7	37	8	236	3.5	Moving/feeding/foraging	No reaction
ADK11	97	174600	ADK_cam_18_85_712009_661021_20190727	10050462	2019-07-27	2019-10-05	71	2019	10	5	7	37	10	236	3.5	Moving/feeding/foraging	No reaction
ADK11	97	174600	ADK_cam_18_85_712009_661021_20190727	10050462	2019-07-27	2019-10-05	71	2019	10	5	7	37	12	236	3.5	Moving/feeding/foraging	No reaction
ADK11	97	174600	ADK_cam_18_85_712009_661021_20190727	10050463	2019-07-27	2019-10-05	71	2019	10	5	7	38	16	237	3.5	Moving/feeding/foraging	No reaction
ADK11	97	174600	ADK_cam_18_85_712009_661021_20190727	10050463	2019-07-27	2019-10-05	71	2019	10	5	7	38	18	237	3.5	Moving/feeding/foraging	No reaction
ADK11	97	174600	ADK_cam_18_85_712009_661021_20190727	10050463	2019-07-27	2019-10-05	71	2019	10	5	7	38	26	238	1.5	Moving/feeding/foraging	No reaction
ADK11	97	174600	ADK_cam_18_85_712009_661021_20190727	10050463	2019-07-27	2019-10-05	71	2019	10	5	7	38	28	238	1.5	Moving/feeding/foraging	No reaction
ADK11	97	174600	ADK_cam_18_85_712009_661021_20190727	10070470	2019-07-27	2019-10-07	73	2019	10	7	7	9	35	239	4.5	Moving/feeding/foraging	No reaction
ADK11	97	174600	ADK_cam_18_85_712009_661021_20190727	10070470	2019-07-27	2019-10-07	73	2019	10	7	7	9	37	239	4.5	Moving/feeding/foraging	No reaction
ADK11	97	174600	ADK_cam_18_85_712009_661021_20190727	10070470	2019-07-27	2019-10-07	73	2019	10	7	7	9	39	239	4.5	Moving/feeding/foraging	No reaction
ADK11	97	174600	ADK_cam_18_85_712009_661021_20190727	10070471	2019-07-27	2019-10-07	73	2019	10	7	7	9	43	240	3.5	Moving/feeding/foraging	No reaction
ADK11	97	174600	ADK_cam_18_85_712009_661021_20190727	10070471	2019-07-27	2019-10-07	73	2019	10	7	7	9	45	240	3.5	Moving/feeding/foraging	No reaction
ADK11	97	174600	ADK_cam_18_85_712009_661021_20190727	10070472	2019-07-27	2019-10-07	73	2019	10	7	7	9	56	241	3.5	Moving/feeding/foraging	No reaction
ADK11	97	174600	ADK_cam_18_85_712009_661021_20190727	10070472	2019-07-27	2019-10-07	73	2019	10	7	7	9	58	241	3.5	Moving/feeding/foraging	No reaction
ADK11	97	174600	ADK_cam_18_85_712009_661021_20190727	10070472	2019-07-27	2019-10-07	73	2019	10	7	7	10	0	241	4.5	Moving/feeding/foraging	No reaction
ADK11	97	174600	ADK_cam_18_85_712009_661021_20190727	10070473	2019-07-27	2019-10-07	73	2019	10	7	7	10	5	242	2.5	Moving/feeding/foraging	No reaction
ADK11	97	174600	ADK_cam_18_85_712009_661021_20190727	10070475	2019-07-27	2019-10-07	73	2019	10	7	7	12	40	243	2.5	Moving/feeding/foraging	No reaction
ADK11	97	174600	ADK_cam_18_85_712009_661021_20190727	10160549	2019-07-27	2019-10-16	82	2019	10	16	7	25	50	244	1.5	Moving/feeding/foraging	No reaction
ADK11	97	174600	ADK_cam_18_85_712009_661021_20190727	10160550	2019-07-27	2019-10-16	82	2019	10	16	7	26	10	245	1.5	Moving/feeding/foraging	No reaction
ADK11	97	174600	ADK_cam_18_85_712009_661021_20190727	10160550	2019-07-27	2019-10-16	82	2019	10	16	7	26	12	245	1.5	Moving/feeding/foraging	No reaction
ADK11	97	174600	ADK_cam_18_85_712009_661021_20190727	10160550	2019-07-27	2019-10-16	82	2019	10	16	7	26	11	246	2.5	Moving/feeding/foraging	No reaction
ADK11	97	174600	ADK_cam_18_85_712009_661021_20190727	10160550	2019-07-27	2019-10-16	82	2019	10	16	7	26	13	246	2.5	Moving/feeding/foraging	No reaction
ADK11	97	174600	ADK_cam_18_85_712009_661021_20190727	10160550	2019-07-27	2019-10-16	82	2019	10	16	7	26	15	246	2.5	Moving/feeding/foraging	No reaction
ADK11	97	174600	ADK_cam_18_85_712009_661021_20190727	10160551	2019-07-27	2019-10-16	82	2019	10	16	7	26	19	247	2.5	Moving/feeding/foraging	No reaction
ADK11	97	174600	ADK_cam_18_85_712009_661021_20190727	10160551	2019-07-27	2019-10-16	82	2019	10	16	7	26	21	247	2.5	Moving/feeding/foraging	No reaction
ADK11	97	174600	ADK_cam_18_85_712009_661021_20190727	10160551	2019-07-27	2019-10-16	82	2019	10	16	7	26	23	247	2.5	Moving/feeding/foraging	No reaction
ADK11	97	174600	ADK_cam_18_85_712009_661021_20190727	10160552	2019-07-27	2019-10-16	82	2019	10	16	7	49	42	248	2.5	Moving/feeding/foraging	No reaction
ADK11	97	174600	ADK_cam_18_85_712009_661021_20190727	10160552	2019-07-27	2019-10-16	82	2019	10	16	7	49	44	248	2.5	Moving/feeding/foraging	No reaction
ADK11	97	174600	ADK_cam_18_85_712009_661021_20190727	10160552	2019-07-27	2019-10-16	82	2019	10	16	7	49	46	248	2.5	Moving/feeding/foraging	No reaction
ADK11	97	174600	ADK_cam_18_85_712009_661021_20190727	10160552	2019-07-27	2019-10-16	82	2019	10	16	7	49	48	248	2.5	Moving/feeding/foraging	No reaction
ADK11	90	162000	ADK_cam_18_85_712009_661021_20190727	10160552	2019-07-27	2019-10-16	82	2019	10	16	7	49	50	248	2.5	Moving/feeding/foraging	No reaction
ADK11	90	162000	ADK_cam_18_85_712009_661021_20190727	10160552	2019-07-27	2019-10-16	82	2019	10	16	7	49	52	248	2.5	Moving/feeding/foraging	No reaction
ADK11	90	162000	ADK_cam_18_85_712009_661021_20190727	11030609	2019-07-27	2019-10-16	82	2019	10	16	7	45	50	249	1.5	Moving/feeding/foraging	No reaction
ADK12	90	162000	NA	NA	2019-04-02	#VALUE!	#VALUE!	NA	NA	NA	NA	NA	NA	NA
ADK13	90	162000	ADK_cam_18_106_696984_664003_20191202	2110202	2019-12-02	2020-02-11	72	2020	2	11	7	7	21	250	1.5	Moving/feeding/foraging	No reaction
ADK13	90	162000	ADK_cam_18_106_696984_664003_20191202	2110202	2019-12-02	2020-02-11	72	2020	2	11	7	7	23	250	1.5	Moving/feeding/foraging	No reaction
ADK13	90	162000	ADK_cam_18_106_696984_664003_20191202	2110203	2019-12-02	2020-02-11	72	2020	2	11	7	7	26	251	1.5	Moving/feeding/foraging	No reaction
ADK13	90	162000	ADK_cam_18_106_696984_664003_20191202	2220261	2019-12-02	2020-02-22	83	2020	2	22	7	24	55	252	3.5	Moving/feeding/foraging	No reaction
ADK13	90	162000	ADK_cam_18_106_696984_664003_20191202	2220261	2019-12-02	2020-02-22	83	2020	2	22	7	24	57	252	3.5	Moving/feeding/foraging	No reaction
ADK13	90	162000	ADK_cam_18_106_696984_664003_20191202	2220261	2019-12-02	2020-02-22	83	2020	2	22	7	24	59	252	3.5	Moving/feeding/foraging	No reaction
ADK13	90	162000	ADK_cam_18_106_696984_664003_20191202	2220262	2019-12-02	2020-02-22	83	2020	2	22	7	25	2	253	2.5	Moving/feeding/foraging	No reaction
ADK13	90	162000	ADK_cam_18_106_696984_664003_20191202	2220262	2019-12-02	2020-02-22	83	2020	2	22	7	25	4	253	2.5	Moving/feeding/foraging	No reaction
ADK13	90	162000	ADK_cam_18_106_696984_664003_20191202	2220262	2019-12-02	2020-02-22	83	2020	2	22	7	25	6	253	2.5	Moving/feeding/foraging	No reaction
ADK13	90	162000	ADK_cam_18_106_696984_664003_20191202	2220263	2019-12-02	2020-02-22	83	2020	2	22	7	25	10	254	2.5	Moving/feeding/foraging	No reaction
ADK13	90	162000	ADK_cam_18_106_696984_664003_20191202	12050010	2019-12-02	2019-12-05	4	2019	12	5	7	22	33	255	3.5	Moving/feeding/foraging	No reaction
ADK13	90	162000	ADK_cam_18_106_696984_664003_20191202	12050010	2019-12-02	2019-12-05	4	2019	12	5	7	22	35	255	3.5	Moving/feeding/foraging	No reaction
ADK13	90	162000	ADK_cam_18_106_696984_664003_20191202	12050010	2019-12-02	2019-12-05	4	2019	12	5	7	22	37	255	3.5	Moving/feeding/foraging	No reaction
ADK13	90	162000	ADK_cam_18_106_696984_664003_20191202	12050010	2019-12-02	2019-12-05	4	2019	12	5	7	22	39	255	3.5	Moving/feeding/foraging	No reaction
ADK13	90	162000	ADK_cam_18_106_696984_664003_20191202	12050010	2019-12-02	2019-12-05	4	2019	12	5	7	22	43	255	3.5	Moving/feeding/foraging	No reaction
ADK13	90	162000	ADK_cam_18_106_696984_664003_20191202	12050010	2019-12-02	2019-12-05	4	2019	12	5	7	22	45	255	3.5	Moving/feeding/foraging	No reaction
ADK13	90	162000	ADK_cam_18_106_696984_664003_20191202	12050010	2019-12-02	2019-12-05	4	2019	12	5	7	22	47	255	3.5	Moving/feeding/foraging	No reaction
ADK13	90	162000	ADK_cam_18_106_696984_664003_20191202	12050010	2019-12-02	2019-12-05	4	2019	12	5	7	22	49	255	3.5	Moving/feeding/foraging	No reaction
ADK13	90	162000	ADK_cam_18_106_696984_664003_20191202	12050010	2019-12-02	2019-12-05	4	2019	12	5	7	22	51	255	2.5	Moving/feeding/foraging	No reaction
ADK13	90	162000	ADK_cam_18_106_696984_664003_20191202	12050010	2019-12-02	2019-12-05	4	2019	12	5	7	22	53	255	2.5	Moving/feeding/foraging	No reaction
ADK13	90	162000	ADK_cam_18_106_696984_664003_20191202	12050010	2019-12-02	2019-12-05	4	2019	12	5	7	22	55	255	2.5	Moving/feeding/foraging	No reaction
ADK13	90	162000	ADK_cam_18_106_696984_664003_20191202	12050010	2019-12-02	2019-12-05	4	2019	12	5	7	22	57	255	2.5	Moving/feeding/foraging	No reaction
ADK13	90	162000	ADK_cam_18_106_696984_664003_20191202	12050010	2019-12-02	2019-12-05	4	2019	12	5	7	22	59	255	2.5	Moving/feeding/foraging	No reaction
ADK13	90	162000	ADK_cam_18_106_696984_664003_20191202	12050010	2019-12-02	2019-12-05	4	2019	12	5	7	22	35	256	9	Moving/feeding/foraging	No reaction
ADK13	90	162000	ADK_cam_18_106_696984_664003_20191202	12050010	2019-12-02	2019-12-05	4	2019	12	5	7	22	37	256	9	Moving/feeding/foraging	No reaction
ADK13	90	162000	ADK_cam_18_106_696984_664003_20191202	12050010	2019-12-02	2019-12-05	4	2019	12	5	7	22	39	256	7.5	Moving/feeding/foraging	No reaction
ADK13	90	162000	ADK_cam_18_106_696984_664003_20191202	12050010	2019-12-02	2019-12-05	4	2019	12	5	7	22	41	256	7.5	Moving/feeding/foraging	No reaction
ADK13	90	162000	ADK_cam_18_106_696984_664003_20191202	12050010	2019-12-02	2019-12-05	4	2019	12	5	7	22	43	256	7.5	Moving/feeding/foraging	No reaction
ADK13	90	162000	ADK_cam_18_106_696984_664003_20191202	12050010	2019-12-02	2019-12-05	4	2019	12	5	7	22	45	256	7.5	Moving/feeding/foraging	No reaction
ADK13	90	162000	ADK_cam_18_106_696984_664003_20191202	12050010	2019-12-02	2019-12-05	4	2019	12	5	7	23	23	257	6.5	Moving/feeding/foraging	No reaction
ADK13	90	162000	ADK_cam_18_106_696984_664003_20191202	12050010	2019-12-02	2019-12-05	4	2019	12	5	7	23	25	257	6.5	Moving/feeding/foraging	No reaction
ADK13	90	162000	ADK_cam_18_106_696984_664003_20191202	12050010	2019-12-02	2019-12-05	4	2019	12	5	7	23	27	257	7.5	Moving/feeding/foraging	No reaction
ADK13	90	162000	ADK_cam_18_106_696984_664003_20191202	12050010	2019-12-02	2019-12-05	4	2019	12	5	7	23	29	257	7.5	Moving/feeding/foraging	No reaction
ADK13	90	162000	ADK_cam_18_106_696984_664003_20191202	12050010	2019-12-02	2019-12-05	4	2019	12	5	7	23	31	257	9	Moving/feeding/foraging	No reaction
ADK13	90	162000	ADK_cam_18_106_696984_664003_20191202	12280067	2019-12-02	2019-12-28	27	2019	12	28	7	6	46	258	3.5	Moving/feeding/foraging	No reaction
ADK13	90	162000	ADK_cam_18_106_696984_664003_20191202	12280067	2019-12-02	2019-12-28	27	2019	12	28	7	6	48	258	3.5	Moving/feeding/foraging	No reaction
ADK13	90	162000	ADK_cam_18_106_696984_664003_20191202	12280067	2019-12-02	2019-12-28	27	2019	12	28	7	6	52	258	2.5	Moving/feeding/foraging	No reaction
ADK13	90	162000	ADK_cam_18_106_696984_664003_20191202	12280067	2019-12-02	2019-12-28	27	2019	12	28	7	6	54	258	2.5	Moving/feeding/foraging	No reaction
ADK13	90	162000	ADK_cam_18_106_696984_664003_20191202	12280067	2019-12-02	2019-12-28	27	2019	12	28	7	6	56	258	1.5	Moving/feeding/foraging	No reaction
ADK13	90	162000	ADK_cam_18_106_696984_664003_20191202	12280067	2019-12-02	2019-12-28	27	2019	12	28	7	6	58	258	1.5	Moving/feeding/foraging	No reaction
ADK13	90	162000	ADK_cam_18_106_696984_664003_20191202	12280067	2019-12-02	2019-12-28	27	2019	12	28	7	6	53	259	9	Moving/feeding/foraging	No reaction
ADK13	90	162000	ADK_cam_18_106_696984_664003_20191202	12280067	2019-12-02	2019-12-28	27	2019	12	28	7	6	55	259	9	Moving/feeding/foraging	No reaction
ADK13	90	162000	ADK_cam_18_106_696984_664003_20191202	12280067	2019-12-02	2019-12-28	27	2019	12	28	7	6	57	259	7.5	Moving/feeding/foraging	No reaction
ADK13	90	162000	ADK_cam_18_106_696984_664003_20191202	12280067	2019-12-02	2019-12-28	27	2019	12	28	7	6	59	259	7.5	Moving/feeding/foraging	No reaction
ADK13	90	162000	ADK_cam_18_106_696984_664003_20191202	12280067	2019-12-02	2019-12-28	27	2019	12	28	7	7	1	259	6.5	Moving/feeding/foraging	No reaction
ADK14	90	162000	ADK_cam_18_79_702986_663998_20191203	12210065	2019-12-03	2019-12-21	19	2019	12	21	7	17	5	260	3.5	Moving/feeding/foraging	No reaction
ADK14	90	162000	ADK_cam_18_79_702986_663998_20191203	12210065	2019-12-03	2019-12-21	19	2019	12	21	7	17	7	260	3.5	Moving/feeding/foraging	No reaction
ADK14	90	162000	ADK_cam_18_79_702986_663998_20191203	12210065	2019-12-03	2019-12-21	19	2019	12	21	7	17	9	260	3.5	Moving/feeding/foraging	No reaction
ADK14	90	162000	ADK_cam_18_79_702986_663998_20191203	12210065	2019-12-03	2019-12-21	19	2019	12	21	7	17	11	260	3.5	Moving/feeding/foraging	No reaction
ADK14	90	162000	ADK_cam_18_79_702986_663998_20191203	12210065	2019-12-03	2019-12-21	19	2019	12	21	7	17	13	260	3.5	Moving/feeding/foraging	No reaction
ADK14	90	162000	ADK_cam_18_79_702986_663998_20191203	12220082	2019-12-03	2019-12-22	20	2019	12	22	7	2	32	261	3.5	Moving/feeding/foraging	No reaction
ADK14	90	162000	ADK_cam_18_79_702986_663998_20191203	12220082	2019-12-03	2019-12-22	20	2019	12	22	7	2	34	261	3.5	Moving/feeding/foraging	No reaction
ADK14	90	162000	ADK_cam_18_79_702986_663998_20191203	12220082	2019-12-03	2019-12-22	20	2019	12	22	7	2	39	262	3.5	Moving/feeding/foraging	No reaction
ADK14	90	162000	ADK_cam_18_79_702986_663998_20191203	12220082	2019-12-03	2019-12-22	20	2019	12	22	7	2	41	262	3.5	Moving/feeding/foraging	No reaction
ADK14	90	162000	ADK_cam_18_79_702986_663998_20191203	12220082	2019-12-03	2019-12-22	20	2019	12	22	7	2	43	262	3.5	Moving/feeding/foraging	No reaction
ADK14	90	162000	ADK_cam_18_79_702986_663998_20191203	12250099	2019-12-03	2019-12-25	23	2019	12	25	7	19	8	263	2.5	Moving/feeding/foraging	No reaction
ADK14	90	162000	ADK_cam_18_79_702986_663998_20191203	12250099	2019-12-03	2019-12-25	23	2019	12	25	7	19	10	263	2.5	Moving/feeding/foraging	No reaction
ADK14	90	162000	ADK_cam_18_79_702986_663998_20191203	12250099	2019-12-03	2019-12-25	23	2019	12	25	7	19	12	263	2.5	Moving/feeding/foraging	No reaction
ADK14	90	162000	ADK_cam_18_79_702986_663998_20191203	12260108	2019-12-03	2019-12-26	24	2019	12	26	7	10	51	264	3.5	Moving/feeding/foraging	No reaction
ADK14	90	162000	ADK_cam_18_79_702986_663998_20191203	12260108	2019-12-03	2019-12-26	24	2019	12	26	7	10	53	264	3.5	Moving/feeding/foraging	No reaction
ADK14	90	162000	ADK_cam_18_79_702986_663998_20191203	12260108	2019-12-03	2019-12-26	24	2019	12	26	7	11	2	265	6.5	Moving/feeding/foraging	No reaction
ADK14	90	162000	ADK_cam_18_79_702986_663998_20191203	12260108	2019-12-03	2019-12-26	24	2019	12	26	7	11	4	265	6.5	Moving/feeding/foraging	No reaction
ADK14	90	162000	ADK_cam_18_79_702986_663998_20191203	12260108	2019-12-03	2019-12-26	24	2019	12	26	7	11	6	265	6.5	Moving/feeding/foraging	No reaction
ADK14	90	162000	ADK_cam_18_79_702986_663998_20191203	12260108	2019-12-03	2019-12-26	24	2019	12	26	7	11	8	265	6.5	Moving/feeding/foraging	No reaction
ADK14	90	162000	ADK_cam_18_79_702986_663998_20191203	12260108	2019-12-03	2019-12-26	24	2019	12	26	7	11	10	265	5.5	Moving/feeding/foraging	No reaction
ADK14	90	162000	ADK_cam_18_79_702986_663998_20191203	12260108	2019-12-03	2019-12-26	24	2019	12	26	7	11	12	265	5.5	Moving/feeding/foraging	No reaction
ADK14	90	162000	ADK_cam_18_79_702986_663998_20191203	12260108	2019-12-03	2019-12-26	24	2019	12	26	7	11	14	265	5.5	Moving/feeding/foraging	No reaction
ADK14	90	162000	ADK_cam_18_79_702986_663998_20191203	12260108	2019-12-03	2019-12-26	24	2019	12	26	7	11	16	265	5.5	Moving/feeding/foraging	No reaction
ADK14	90	162000	ADK_cam_18_79_702986_663998_20191203	12260108	2019-12-03	2019-12-26	24	2019	12	26	7	11	18	265	5.5	Moving/feeding/foraging	No reaction
ADK14	90	162000	ADK_cam_18_79_702986_663998_20191203	12260109	2019-12-03	2019-12-26	24	2019	12	26	7	11	24	266	4.5	Moving/feeding/foraging	No reaction
ADK14	90	162000	ADK_cam_18_79_702986_663998_20191203	12260109	2019-12-03	2019-12-26	24	2019	12	26	7	11	26	266	4.5	Moving/feeding/foraging	No reaction
ADK14	90	162000	ADK_cam_18_79_702986_663998_20191203	12260109	2019-12-03	2019-12-26	24	2019	12	26	7	11	28	266	4.5	Moving/feeding/foraging	No reaction
ADK14	90	162000	ADK_cam_18_79_702986_663998_20191203	12280121	2019-12-03	2019-12-28	26	2019	12	28	7	20	7	267	2.5	Moving/feeding/foraging	No reaction
ADK14	90	162000	ADK_cam_18_79_702986_663998_20191203	12280121	2019-12-03	2019-12-28	26	2019	12	28	7	20	9	267	2.5	Moving/feeding/foraging	No reaction
ADK14	90	162000	ADK_cam_18_79_702986_663998_20191203	12280121	2019-12-03	2019-12-28	26	2019	12	28	7	20	11	267	2.5	Moving/feeding/foraging	No reaction
ADK14	90	162000	ADK_cam_18_79_702986_663998_20191203	12280121	2019-12-03	2019-12-28	26	2019	12	28	7	20	22	268	3.5	Moving/feeding/foraging	No reaction
ADK14	90	162000	ADK_cam_18_79_702986_663998_20191203	12280121	2019-12-03	2019-12-28	26	2019	12	28	7	20	24	268	3.5	Moving/feeding/foraging	No reaction
ADK14	90	162000	ADK_cam_18_79_702986_663998_20191203	12280121	2019-12-03	2019-12-28	26	2019	12	28	7	20	26	268	3.5	Moving/feeding/foraging	No reaction
ADK14	90	162000	ADK_cam_18_79_702986_663998_20191203	12280121	2019-12-03	2019-12-28	26	2019	12	28	7	20	28	268	3.5	Moving/feeding/foraging	No reaction
ADK14	90	162000	ADK_cam_18_79_702986_663998_20191203	12280121	2019-12-03	2019-12-28	26	2019	12	28	7	20	30	268	3.5	Moving/feeding/foraging	No reaction
ADK14	90	162000	ADK_cam_18_79_702986_663998_20191203	12290126	2019-12-03	2019-12-29	27	2019	12	29	7	43	59	269	6.5	Moving/feeding/foraging	No reaction
ADK14	90	162000	ADK_cam_18_79_702986_663998_20191203	12290126	2019-12-03	2019-12-29	27	2019	12	29	7	44	1	269	5.5	Moving/feeding/foraging	No reaction
ADK14	90	162000	ADK_cam_18_79_702986_663998_20191203	12290126	2019-12-03	2019-12-29	27	2019	12	29	7	44	3	269	5.5	Moving/feeding/foraging	No reaction
ADK14	90	162000	ADK_cam_18_79_702986_663998_20191203	12290126	2019-12-03	2019-12-29	27	2019	12	29	7	44	6	270	6.5	Moving/feeding/foraging	No reaction
ADK14	90	162000	ADK_cam_18_79_702986_663998_20191203	12290126	2019-12-03	2019-12-29	27	2019	12	29	7	44	8	270	6.5	Moving/feeding/foraging	No reaction
ADK14	90	162000	ADK_cam_18_79_702986_663998_20191203	12290126	2019-12-03	2019-12-29	27	2019	12	29	7	44	10	270	6.5	Moving/feeding/foraging	No reaction
ADK14	90	162000	ADK_cam_18_79_702986_663998_20191203	12290126	2019-12-03	2019-12-29	27	2019	12	29	7	44	12	270	6.5	Moving/feeding/foraging	No reaction
ADK14	90	162000	ADK_cam_18_79_702986_663998_20191203	12290126	2019-12-03	2019-12-29	27	2019	12	29	7	44	14	270	5.5	Moving/feeding/foraging	No reaction
ADK14	90	162000	ADK_cam_18_79_702986_663998_20191203	12290126	2019-12-03	2019-12-29	27	2019	12	29	7	44	16	270	4.5	Moving/feeding/foraging	No reaction
ADK14	90	162000	ADK_cam_18_79_702986_663998_20191203	12290126	2019-12-03	2019-12-29	27	2019	12	29	7	44	18	270	4.5	Moving/feeding/foraging	No reaction
ADK14	90	162000	ADK_cam_18_79_702986_663998_20191203	12290126	2019-12-03	2019-12-29	27	2019	12	29	7	44	20	270	3.5	Moving/feeding/foraging	No reaction
ADK14	90	162000	ADK_cam_18_79_702986_663998_20191203	12290126	2019-12-03	2019-12-29	27	2019	12	29	7	44	22	270	3.5	Moving/feeding/foraging	No reaction
ADK14	90	162000	ADK_cam_18_79_702986_663998_20191203	12290126	2019-12-03	2019-12-29	27	2019	12	29	7	44	24	270	3.5	Moving/feeding/foraging	No reaction
ADK14	90	162000	ADK_cam_18_79_702986_663998_20191203	12290126	2019-12-03	2019-12-29	27	2019	12	29	7	44	26	270	3.5	Moving/feeding/foraging	No reaction
ADK14	90	162000	ADK_cam_18_79_702986_663998_20191203	12290127	2019-12-03	2019-12-29	27	2019	12	29	7	44	29	271	3.5	Moving/feeding/foraging	No reaction
ADK14	90	162000	ADK_cam_18_79_702986_663998_20191203	12300131	2019-12-03	2019-12-30	28	2019	12	30	7	13	47	272	3.5	Moving/feeding/foraging	No reaction
ADK14	90	162000	ADK_cam_18_79_702986_663998_20191203	12300131	2019-12-03	2019-12-30	28	2019	12	30	7	13	49	272	3.5	Moving/feeding/foraging	No reaction
ADK14	90	162000	ADK_cam_18_79_702986_663998_20191203	12300131	2019-12-03	2019-12-30	28	2019	12	30	7	13	59	273	3.5	Moving/feeding/foraging	No reaction
ADK14	90	162000	ADK_cam_18_79_702986_663998_20191203	12300131	2019-12-03	2019-12-30	28	2019	12	30	7	14	1	273	3.5	Moving/feeding/foraging	No reaction
ADK14	90	162000	ADK_cam_18_79_702986_663998_20191203	12300131	2019-12-03	2019-12-30	28	2019	12	30	7	14	3	273	3.5	Moving/feeding/foraging	No reaction
ADK14	90	162000	ADK_cam_18_79_702986_663998_20191203	12310138	2019-12-03	2019-12-31	29	2019	12	31	7	0	49	274	3.5	Moving/feeding/foraging	No reaction
ADK14	90	162000	ADK_cam_18_79_702986_663998_20191203	12310138	2019-12-03	2019-12-31	29	2019	12	31	7	0	49	275	3.5	Moving/feeding/foraging	No reaction
ADK14	90	162000	ADK_cam_18_79_702986_663998_20191203	1010144	2019-12-03	2020-01-01	30	2020	1	1	7	46	55	276	3.5	Moving/feeding/foraging	No reaction
ADK14	90	162000	ADK_cam_18_79_702986_663998_20191203	1010145	2019-12-03	2020-01-01	30	2020	1	1	7	47	55	277	2.5	Moving/feeding/foraging	No reaction
ADK14	90	162000	ADK_cam_18_79_702986_663998_20191203	1010145	2019-12-03	2020-01-01	30	2020	1	1	7	47	55	277	2.5	Moving/feeding/foraging	No reaction
ADK14	90	162000	ADK_cam_18_79_702986_663998_20191203	1010146	2019-12-03	2020-01-01	30	2020	1	1	7	48	18	278	2.5	Moving/feeding/foraging	No reaction
ADK14	90	162000	ADK_cam_18_79_702986_663998_20191203	1010146	2019-12-03	2020-01-01	30	2020	1	1	7	48	20	278	2.5	Moving/feeding/foraging	No reaction
ADK14	90	162000	ADK_cam_18_79_702986_663998_20191203	1010146	2019-12-03	2020-01-01	30	2020	1	1	7	48	22	278	2.5	Moving/feeding/foraging	No reaction
ADK14	90	162000	ADK_cam_18_79_702986_663998_20191203	1030179	2019-12-03	2020-01-03	32	2020	1	3	7	6	17	279	2.5	Moving/feeding/foraging	No reaction
ADK14	90	162000	ADK_cam_18_79_702986_663998_20191203	1030179	2019-12-03	2020-01-03	32	2020	1	3	7	6	19	279	2.5	Moving/feeding/foraging	No reaction
ADK14	90	162000	ADK_cam_18_79_702986_663998_20191203	1030179	2019-12-03	2020-01-03	32	2020	1	3	7	6	21	279	2.5	Moving/feeding/foraging	No reaction
ADK14	90	162000	ADK_cam_18_79_702986_663998_20191203	1030179	2019-12-03	2020-01-03	32	2020	1	3	7	6	23	279	2.5	Moving/feeding/foraging	No reaction
ADK14	90	162000	ADK_cam_18_79_702986_663998_20191203	1030180	2019-12-03	2020-01-03	32	2020	1	3	7	6	26	280	2.5	Moving/feeding/foraging	No reaction
ADK14	90	162000	ADK_cam_18_79_702986_663998_20191203	1030180	2019-12-03	2020-01-03	32	2020	1	3	7	6	28	280	2.5	Moving/feeding/foraging	No reaction
ADK14	90	162000	ADK_cam_18_79_702986_663998_20191203	1030180	2019-12-03	2020-01-03	32	2020	1	3	7	6	30	280	2.5	Moving/feeding/foraging	No reaction
ADK14	90	162000	ADK_cam_18_79_702986_663998_20191203	1030181	2019-12-03	2020-01-03	32	2020	1	3	7	6	33	281	2.5	Moving/feeding/foraging	No reaction
ADK14	90	162000	ADK_cam_18_79_702986_663998_20191203	1030181	2019-12-03	2020-01-03	32	2020	1	3	7	6	35	281	2.5	Moving/feeding/foraging	No reaction
ADK14	90	162000	ADK_cam_18_79_702986_663998_20191203	1030182	2019-12-03	2020-01-03	32	2020	1	3	7	6	41	282	2.5	Moving/feeding/foraging	No reaction
ADK14	90	162000	ADK_cam_18_79_702986_663998_20191203	1030182	2019-12-03	2020-01-03	32	2020	1	3	7	6	43	282	2.5	Moving/feeding/foraging	No reaction
ADK14	90	162000	ADK_cam_18_79_702986_663998_20191203	1030182	2019-12-03	2020-01-03	32	2020	1	3	7	6	45	282	2.5	Moving/feeding/foraging	No reaction
ADK14	90	162000	ADK_cam_18_79_702986_663998_20191203	1030183	2019-12-03	2020-01-03	32	2020	1	3	7	6	47	283	3.5	Moving/feeding/foraging	No reaction
ADK14	90	162000	ADK_cam_18_79_702986_663998_20191203	1030183	2019-12-03	2020-01-03	32	2020	1	3	7	6	49	283	3.5	Moving/feeding/foraging	No reaction
ADK14	90	162000	ADK_cam_18_79_702986_663998_20191203	1030183	2019-12-03	2020-01-03	32	2020	1	3	7	6	51	283	3.5	Moving/feeding/foraging	No reaction
ADK14	90	162000	ADK_cam_18_79_702986_663998_20191203	1030184	2019-12-03	2020-01-03	32	2020	1	3	7	6	55	284	3.5	Moving/feeding/foraging	No reaction
ADK14	90	162000	ADK_cam_18_79_702986_663998_20191203	1030184	2019-12-03	2020-01-03	32	2020	1	3	7	6	57	284	3.5	Moving/feeding/foraging	No reaction
ADK14	90	162000	ADK_cam_18_79_702986_663998_20191203	1030184	2019-12-03	2020-01-03	32	2020	1	3	7	6	59	284	3.5	Moving/feeding/foraging	No reaction
ADK14	90	162000	ADK_cam_18_79_702986_663998_20191203	1030185	2019-12-03	2020-01-03	32	2020	1	3	7	7	10	285	4.5	Moving/feeding/foraging	No reaction
ADK14	90	162000	ADK_cam_18_79_702986_663998_20191203	1030185	2019-12-03	2020-01-03	32	2020	1	3	7	7	12	285	4.5	Moving/feeding/foraging	No reaction
ADK14	90	162000	ADK_cam_18_79_702986_663998_20191203	1030185	2019-12-03	2020-01-03	32	2020	1	3	7	7	14	285	4.5	Moving/feeding/foraging	No reaction
ADK14	90	162000	ADK_cam_18_79_702986_663998_20191203	1030186	2019-12-03	2020-01-03	32	2020	1	3	7	7	17	286	4.5	Moving/feeding/foraging	No reaction
ADK14	90	162000	ADK_cam_18_79_702986_663998_20191203	1030186	2019-12-03	2020-01-03	32	2020	1	3	7	7	19	286	4.5	Moving/feeding/foraging	No reaction
ADK14	90	162000	ADK_cam_18_79_702986_663998_20191203	1030186	2019-12-03	2020-01-03	32	2020	1	3	7	7	21	286	4.5	Moving/feeding/foraging	No reaction
ADK14	90	162000	ADK_cam_18_79_702986_663998_20191203	1030187	2019-12-03	2020-01-03	32	2020	1	3	7	7	24	287	4.5	Moving/feeding/foraging	No reaction
ADK14	90	162000	ADK_cam_18_79_702986_663998_20191203	1030187	2019-12-03	2020-01-03	32	2020	1	3	7	7	26	287	4.5	Moving/feeding/foraging	No reaction
ADK14	90	162000	ADK_cam_18_79_702986_663998_20191203	1030187	2019-12-03	2020-01-03	32	2020	1	3	7	7	28	287	4.5	Moving/feeding/foraging	No reaction
ADK14	90	162000	ADK_cam_18_79_702986_663998_20191203	1030188	2019-12-03	2020-01-03	32	2020	1	3	7	7	32	288	4.5	Moving/feeding/foraging	No reaction
ADK14	90	162000	ADK_cam_18_79_702986_663998_20191203	1030188	2019-12-03	2020-01-03	32	2020	1	3	7	7	34	288	4.5	Moving/feeding/foraging	No reaction
ADK14	90	162000	ADK_cam_18_79_702986_663998_20191203	1030188	2019-12-03	2020-01-03	32	2020	1	3	7	7	36	288	4.5	Moving/feeding/foraging	No reaction
ADK14	90	162000	ADK_cam_18_79_702986_663998_20191203	1050216	2019-12-03	2020-01-05	34	2020	1	5	7	12	11	289	2.5	Moving/feeding/foraging	No reaction
ADK14	90	162000	ADK_cam_18_79_702986_663998_20191203	1050217	2019-12-03	2020-01-05	34	2020	1	5	7	15	2	290	2.5	Moving/feeding/foraging	No reaction
ADK14	90	162000	ADK_cam_18_79_702986_663998_20191203	1050218	2019-12-03	2020-01-05	34	2020	1	5	7	16	48	291	3.5	Moving/feeding/foraging	No reaction
ADK14	90	162000	ADK_cam_18_79_702986_663998_20191203	1050218	2019-12-03	2020-01-05	34	2020	1	5	7	16	50	291	2.5	Moving/feeding/foraging	No reaction
ADK14	90	162000	ADK_cam_18_79_702986_663998_20191203	1050219	2019-12-03	2020-01-05	34	2020	1	5	7	20	48	292	2.5	Moving/feeding/foraging	No reaction
ADK14	90	162000	ADK_cam_18_79_702986_663998_20191203	1060243	2019-12-03	2020-01-06	35	2020	1	6	7	56	56	293	2.5	Moving/feeding/foraging	No reaction
ADK14	90	162000	ADK_cam_18_79_702986_663998_20191203	1060243	2019-12-03	2020-01-06	35	2020	1	6	7	56	58	293	2.5	Moving/feeding/foraging	No reaction
ADK14	90	162000	ADK_cam_18_79_702986_663998_20191203	1060243	2019-12-03	2020-01-06	35	2020	1	6	7	57	0	293	2.5	Moving/feeding/foraging	No reaction
ADK14	90	162000	ADK_cam_18_79_702986_663998_20191203	1070253	2019-12-03	2020-01-07	36	2020	1	7	7	3	28	294	4.5	Moving/feeding/foraging	No reaction
ADK14	90	162000	ADK_cam_18_79_702986_663998_20191203	1070253	2019-12-03	2020-01-07	36	2020	1	7	7	3	30	294	4.5	Moving/feeding/foraging	No reaction
ADK14	90	162000	ADK_cam_18_79_702986_663998_20191203	1070253	2019-12-03	2020-01-07	36	2020	1	7	7	3	32	294	4.5	Moving/feeding/foraging	No reaction
ADK14	90	162000	ADK_cam_18_79_702986_663998_20191203	1070254	2019-12-03	2020-01-07	36	2020	1	7	7	3	37	295	4.5	Moving/feeding/foraging	No reaction
ADK14	90	162000	ADK_cam_18_79_702986_663998_20191203	1070254	2019-12-03	2020-01-07	36	2020	1	7	7	3	39	295	4.5	Moving/feeding/foraging	No reaction
ADK14	90	162000	ADK_cam_18_79_702986_663998_20191203	1070254	2019-12-03	2020-01-07	36	2020	1	7	7	3	41	295	4.5	Moving/feeding/foraging	No reaction
ADK14	90	162000	ADK_cam_18_79_702986_663998_20191203	1070256	2019-12-03	2020-01-07	36	2020	1	7	7	4	29	296	2.5	Moving/feeding/foraging	No reaction
ADK14	90	162000	ADK_cam_18_79_702986_663998_20191203	1070256	2019-12-03	2020-01-07	36	2020	1	7	7	4	31	296	2.5	Moving/feeding/foraging	No reaction
ADK14	90	162000	ADK_cam_18_79_702986_663998_20191203	1140380	2019-12-03	2020-01-14	43	2020	1	14	7	35	39	297	3.5	Moving/feeding/foraging	No reaction
ADK14	90	162000	ADK_cam_18_79_702986_663998_20191203	1140380	2019-12-03	2020-01-14	43	2020	1	14	7	35	41	297	3.5	Moving/feeding/foraging	No reaction
ADK14	90	162000	ADK_cam_18_79_702986_663998_20191203	1140380	2019-12-03	2020-01-14	43	2020	1	14	7	35	43	297	3.5	Moving/feeding/foraging	No reaction
ADK14	90	162000	ADK_cam_18_79_702986_663998_20191203	1140381	2019-12-03	2020-01-14	43	2020	1	14	7	35	46	298	3.5	Moving/feeding/foraging	No reaction
ADK14	90	162000	ADK_cam_18_79_702986_663998_20191203	1140381	2019-12-03	2020-01-14	43	2020	1	14	7	35	48	298	3.5	Moving/feeding/foraging	No reaction
ADK14	90	162000	ADK_cam_18_79_702986_663998_20191203	1140381	2019-12-03	2020-01-14	43	2020	1	14	7	35	50	298	3.5	Moving/feeding/foraging	No reaction
ADK14	90	162000	ADK_cam_18_79_702986_663998_20191203	1140382	2019-12-03	2020-01-14	43	2020	1	14	7	35	54	299	2.5	Moving/feeding/foraging	No reaction
ADK14	90	162000	ADK_cam_18_79_702986_663998_20191203	1140382	2019-12-03	2020-01-14	43	2020	1	14	7	35	56	299	2.5	Moving/feeding/foraging	No reaction
ADK14	90	162000	ADK_cam_18_79_702986_663998_20191203	1140382	2019-12-03	2020-01-14	43	2020	1	14	7	35	58	299	2.5	Moving/feeding/foraging	No reaction
ADK14	90	162000	ADK_cam_18_79_702986_663998_20191203	1140383	2019-12-03	2020-01-14	43	2020	1	14	7	44	23	300	1.5	Moving/feeding/foraging	No reaction
ADK14	90	162000	ADK_cam_18_79_702986_663998_20191203	1140383	2019-12-03	2020-01-14	43	2020	1	14	7	44	25	300	1.5	Moving/feeding/foraging	No reaction
ADK14	90	162000	ADK_cam_18_79_702986_663998_20191203	1140383	2019-12-03	2020-01-14	43	2020	1	14	7	44	27	300	1.5	Moving/feeding/foraging	No reaction
ADK14	90	162000	ADK_cam_18_79_702986_663998_20191203	1140384	2019-12-03	2020-01-14	43	2020	1	14	7	44	31	301	1.5	Moving/feeding/foraging	No reaction
ADK14	90	162000	ADK_cam_18_79_702986_663998_20191203	1140384	2019-12-03	2020-01-14	43	2020	1	14	7	44	33	301	1.5	Moving/feeding/foraging	No reaction
ADK14	90	162000	ADK_cam_18_79_702986_663998_20191203	1140384	2019-12-03	2020-01-14	43	2020	1	14	7	44	35	301	1.5	Moving/feeding/foraging	No reaction
ADK14	97	174600	ADK_cam_18_79_702986_663998_20191203	1140385	2019-12-03	2020-01-14	43	2020	1	14	7	44	38	302	1.5	Moving/feeding/foraging	No reaction
ADK14	97	174600	ADK_cam_18_79_702986_663998_20191203	1140386	2019-12-03	2020-01-14	43	2020	1	14	7	44	0	303	1.5	Moving/feeding/foraging	No reaction
ADK14	97	174600	ADK_cam_18_79_702986_663998_20191203	1140386	2019-12-03	2020-01-14	43	2020	1	14	7	44	2	303	1.5	Moving/feeding/foraging	No reaction
ADK14	97	174600	ADK_cam_18_79_702986_663998_20191203	1140386	2019-12-03	2020-01-14	43	2020	1	14	7	44	4	303	1.5	Moving/feeding/foraging	No reaction
ADK15	97	174600	ADK_cam_18_84_709005_663971_20191228	11290004	2019-11-28	2019-11-29	2	2019	11	29	7	1	4	304	3.5	Moving/feeding/foraging	No reaction
ADK15	97	174600	ADK_cam_18_84_709005_663971_20191228	11290004	2019-11-28	2019-11-29	2	2019	11	29	7	1	6	304	3.5	Moving/feeding/foraging	No reaction
ADK15	97	174600	ADK_cam_18_84_709005_663971_20191228	11290004	2019-11-28	2019-11-29	2	2019	11	29	7	1	8	304	3.5	Moving/feeding/foraging	No reaction
ADK15	97	174600	ADK_cam_18_84_709005_663971_20191228	11290004	2019-11-28	2019-11-29	2	2019	11	29	7	1	10	304	3.5	Moving/feeding/foraging	No reaction
ADK15	97	174600	ADK_cam_18_84_709005_663971_20191228	11290004	2019-11-28	2019-11-29	2	2019	11	29	7	1	12	304	3.5	Moving/feeding/foraging	No reaction
ADK15	97	174600	ADK_cam_18_84_709005_663971_20191228	11290004	2019-11-28	2019-11-29	2	2019	11	29	7	1	14	304	4.5	Moving/feeding/foraging	No reaction
ADK15	97	174600	ADK_cam_18_84_709005_663971_20191228	11290004	2019-11-28	2019-11-29	2	2019	11	29	7	1	16	304	4.5	Moving/feeding/foraging	No reaction
ADK15	97	174600	ADK_cam_18_84_709005_663971_20191228	11290004	2019-11-28	2019-11-29	2	2019	11	29	7	1	18	304	5.5	Moving/feeding/foraging	No reaction
ADK15	97	174600	ADK_cam_18_84_709005_663971_20191228	11290004	2019-11-28	2019-11-29	2	2019	11	29	7	1	20	304	5.5	Moving/feeding/foraging	No reaction
ADK15	97	174600	ADK_cam_18_84_709005_663971_20191228	11290004	2019-11-28	2019-11-29	2	2019	11	29	7	1	22	304	5.5	Moving/feeding/foraging	No reaction
ADK15	97	174600	ADK_cam_18_84_709005_663971_20191228	11290004	2019-11-28	2019-11-29	2	2019	11	29	7	1	24	304	5.5	Moving/feeding/foraging	No reaction
ADK15	97	174600	ADK_cam_18_84_709005_663971_20191228	11290004	2019-11-28	2019-11-29	2	2019	11	29	7	1	26	304	6.5	Moving/feeding/foraging	No reaction
ADK15	97	174600	ADK_cam_18_84_709005_663971_20191228	11290004	2019-11-28	2019-11-29	2	2019	11	29	7	1	28	304	6.5	Moving/feeding/foraging	No reaction
ADK15	97	174600	ADK_cam_18_84_709005_663971_20191228	11290004	2019-11-28	2019-11-29	2	2019	11	29	7	1	30	304	6.5	Moving/feeding/foraging	No reaction
ADK15	97	174600	ADK_cam_18_84_709005_663971_20191228	11290004	2019-11-28	2019-11-29	2	2019	11	29	7	1	32	304	6.5	Moving/feeding/foraging	No reaction
ADK15	97	174600	ADK_cam_18_84_709005_663971_20191228	11290004	2019-11-28	2019-11-29	2	2019	11	29	7	1	34	304	6.5	Moving/feeding/foraging	No reaction
ADK15	97	174600	ADK_cam_18_84_709005_663971_20191228	11290004	2019-11-28	2019-11-29	2	2019	11	29	7	1	36	304	6.5	Moving/feeding/foraging	No reaction
ADK15	97	174600	ADK_cam_18_84_709005_663971_20191228	11290004	2019-11-28	2019-11-29	2	2019	11	29	7	1	38	304	6.5	Moving/feeding/foraging	No reaction
ADK15	97	174600	ADK_cam_18_84_709005_663971_20191228	11290004	2019-11-28	2019-11-29	2	2019	11	29	7	1	40	304	6.5	Moving/feeding/foraging	No reaction
ADK15	97	174600	ADK_cam_18_84_709005_663971_20191228	11290004	2019-11-28	2019-11-29	2	2019	11	29	7	1	33	305	5.5	Moving/feeding/foraging	No reaction
ADK15	97	174600	ADK_cam_18_84_709005_663971_20191228	11290004	2019-11-28	2019-11-29	2	2019	11	29	7	1	35	305	5.5	Moving/feeding/foraging	No reaction
ADK15	97	174600	ADK_cam_18_84_709005_663971_20191228	11290004	2019-11-28	2019-11-29	2	2019	11	29	7	1	37	305	5.5	Moving/feeding/foraging	No reaction
ADK15	97	174600	ADK_cam_18_84_709005_663971_20191228	11290004	2019-11-28	2019-11-29	2	2019	11	29	7	1	39	305	5.5	Moving/feeding/foraging	No reaction
ADK15	97	174600	ADK_cam_18_84_709005_663971_20191228	11290004	2019-11-28	2019-11-29	2	2019	11	29	7	1	41	305	5.5	Moving/feeding/foraging	No reaction
ADK15	97	174600	ADK_cam_18_84_709005_663971_20191228	11290004	2019-11-28	2019-11-29	2	2019	11	29	7	1	43	305	5.5	Moving/feeding/foraging	No reaction
ADK15	97	174600	ADK_cam_18_84_709005_663971_20191228	11290004	2019-11-28	2019-11-29	2	2019	11	29	7	1	45	305	5.5	Moving/feeding/foraging	No reaction
ADK15	97	174600	ADK_cam_18_84_709005_663971_20191228	11290004	2019-11-28	2019-11-29	2	2019	11	29	7	1	47	305	5.5	Moving/feeding/foraging	No reaction
ADK15	97	174600	ADK_cam_18_84_709005_663971_20191228	11290004	2019-11-28	2019-11-29	2	2019	11	29	7	1	49	305	5.5	Moving/feeding/foraging	No reaction
ADK15	97	174600	ADK_cam_18_84_709005_663971_20191228	11290004	2019-11-28	2019-11-29	2	2019	11	29	7	1	51	305	5.5	Moving/feeding/foraging	No reaction
ADK15	97	174600	ADK_cam_18_84_709005_663971_20191228	11290004	2019-11-28	2019-11-29	2	2019	11	29	7	1	53	305	5.5	Moving/feeding/foraging	No reaction
ADK15	97	174600	ADK_cam_18_84_709005_663971_20191228	11290004	2019-11-28	2019-11-29	2	2019	11	29	7	1	55	305	4.5	Moving/feeding/foraging	No reaction
ADK15	97	174600	ADK_cam_18_84_709005_663971_20191228	11290004	2019-11-28	2019-11-29	2	2019	11	29	7	1	57	305	4.5	Moving/feeding/foraging	No reaction
ADK15	97	174600	ADK_cam_18_84_709005_663971_20191228	11290004	2019-11-28	2019-11-29	2	2019	11	29	7	1	59	305	4.5	Moving/feeding/foraging	No reaction
ADK15	97	174600	ADK_cam_18_84_709005_663971_20191228	11290004	2019-11-28	2019-11-29	2	2019	11	29	7	2	1	305	4.5	Moving/feeding/foraging	No reaction
ADK15	97	174600	ADK_cam_18_84_709005_663971_20191228	12080029	2019-11-28	2019-12-08	11	2019	12	8	7	19	7	306	7.5	Moving/feeding/foraging	No reaction
ADK15	97	174600	ADK_cam_18_84_709005_663971_20191228	12080029	2019-11-28	2019-12-08	11	2019	12	8	7	19	9	306	7.5	Moving/feeding/foraging	No reaction
ADK15	97	174600	ADK_cam_18_84_709005_663971_20191228	12080029	2019-11-28	2019-12-08	11	2019	12	8	7	19	11	306	7.5	Moving/feeding/foraging	No reaction
ADK15	97	174600	ADK_cam_18_84_709005_663971_20191228	12080029	2019-11-28	2019-12-08	11	2019	12	8	7	19	13	306	7.5	Moving/feeding/foraging	No reaction
ADK15	97	174600	ADK_cam_18_84_709005_663971_20191228	12080029	2019-11-28	2019-12-08	11	2019	12	8	7	19	15	306	7.5	Moving/feeding/foraging	No reaction
ADK15	97	174600	ADK_cam_18_84_709005_663971_20191228	12080029	2019-11-28	2019-12-08	11	2019	12	8	7	19	17	306	7.5	Moving/feeding/foraging	No reaction
ADK15	97	174600	ADK_cam_18_84_709005_663971_20191228	12080029	2019-11-28	2019-12-08	11	2019	12	8	7	19	19	306	7.5	Moving/feeding/foraging	No reaction
ADK15	97	174600	ADK_cam_18_84_709005_663971_20191228	12080029	2019-11-28	2019-12-08	11	2019	12	8	7	19	21	306	7.5	Moving/feeding/foraging	No reaction
ADK15	97	174600	ADK_cam_18_84_709005_663971_20191228	12080029	2019-11-28	2019-12-08	11	2019	12	8	7	19	20	307	9	Moving/feeding/foraging	No reaction
ADK15	97	174600	ADK_cam_18_84_709005_663971_20191228	12080029	2019-11-28	2019-12-08	11	2019	12	8	7	19	22	307	9	Moving/feeding/foraging	No reaction
ADK15	97	174600	ADK_cam_18_84_709005_663971_20191228	12080029	2019-11-28	2019-12-08	11	2019	12	8	7	19	24	307	9	Moving/feeding/foraging	No reaction
ADK15	97	174600	ADK_cam_18_84_709005_663971_20191228	12080029	2019-11-28	2019-12-08	11	2019	12	8	7	19	26	307	9	Moving/feeding/foraging	No reaction
ADK15	97	174600	ADK_cam_18_84_709005_663971_20191228	12080029	2019-11-28	2019-12-08	11	2019	12	8	7	19	28	307	9	Moving/feeding/foraging	No reaction
ADK15	97	174600	ADK_cam_18_84_709005_663971_20191228	12080029	2019-11-28	2019-12-08	11	2019	12	8	7	19	30	307	9	Moving/feeding/foraging	No reaction
ADK15	97	174600	ADK_cam_18_84_709005_663971_20191228	12080029	2019-11-28	2019-12-08	11	2019	12	8	7	19	32	307	9	Moving/feeding/foraging	No reaction
ADK15	97	174600	ADK_cam_18_84_709005_663971_20191228	12080029	2019-11-28	2019-12-08	11	2019	12	8	7	19	34	307	9	Moving/feeding/foraging	No reaction
ADK15	97	174600	ADK_cam_18_84_709005_663971_20191228	12080029	2019-11-28	2019-12-08	11	2019	12	8	7	19	36	307	9	Moving/feeding/foraging	No reaction
ADK15	97	174600	ADK_cam_18_84_709005_663971_20191228	12080029	2019-11-28	2019-12-08	11	2019	12	8	7	19	38	307	9	Moving/feeding/foraging	No reaction
ADK15	97	174600	ADK_cam_18_84_709005_663971_20191228	12080029	2019-11-28	2019-12-08	11	2019	12	8	7	19	40	307	9	Moving/feeding/foraging	No reaction
ADK15	97	174600	ADK_cam_18_84_709005_663971_20191228	12080029	2019-11-28	2019-12-08	11	2019	12	8	7	19	42	307	9	Moving/feeding/foraging	No reaction
ADK15	97	174600	ADK_cam_18_84_709005_663971_20191228	12080029	2019-11-28	2019-12-08	11	2019	12	8	7	19	44	307	9	Moving/feeding/foraging	No reaction
ADK15	97	174600	ADK_cam_18_84_709005_663971_20191228	12080029	2019-11-28	2019-12-08	11	2019	12	8	7	19	46	307	9	Moving/feeding/foraging	No reaction
ADK15	97	174600	ADK_cam_18_84_709005_663971_20191228	12080029	2019-11-28	2019-12-08	11	2019	12	8	7	19	48	307	9	Moving/feeding/foraging	No reaction
ADK15	97	174600	ADK_cam_18_84_709005_663971_20191228	12080029	2019-11-28	2019-12-08	11	2019	12	8	7	19	50	307	9	Moving/feeding/foraging	No reaction
ADK15	97	174600	ADK_cam_18_84_709005_663971_20191228	12080029	2019-11-28	2019-12-08	11	2019	12	8	7	19	52	307	9	Moving/feeding/foraging	No reaction
ADK15	97	174600	ADK_cam_18_84_709005_663971_20191228	12080029	2019-11-28	2019-12-08	11	2019	12	8	7	19	54	307	9	Moving/feeding/foraging	No reaction
ADK15	97	174600	ADK_cam_18_84_709005_663971_20191228	12190059	2019-11-28	2019-12-19	22	2019	12	19	7	56	21	308	3.5	Moving/feeding/foraging	No reaction
ADK15	97	174600	ADK_cam_18_84_709005_663971_20191228	12190059	2019-11-28	2019-12-19	22	2019	12	19	7	56	23	308	3.5	Moving/feeding/foraging	No reaction
ADK15	97	174600	ADK_cam_18_84_709005_663971_20191228	12190059	2019-11-28	2019-12-19	22	2019	12	19	7	56	25	308	3.5	Moving/feeding/foraging	No reaction
ADK15	97	174600	ADK_cam_18_84_709005_663971_20191228	12190059	2019-11-28	2019-12-19	22	2019	12	19	7	56	27	308	3.5	Moving/feeding/foraging	No reaction
ADK15	97	174600	ADK_cam_18_84_709005_663971_20191228	12190059	2019-11-28	2019-12-19	22	2019	12	19	7	56	29	308	3.5	Moving/feeding/foraging	No reaction
ADK15	97	174600	ADK_cam_18_84_709005_663971_20191228	12190059	2019-11-28	2019-12-19	22	2019	12	19	7	56	31	308	4.5	Moving/feeding/foraging	No reaction
ADK15	97	174600	ADK_cam_18_84_709005_663971_20191228	12190059	2019-11-28	2019-12-19	22	2019	12	19	7	56	33	308	4.5	Moving/feeding/foraging	No reaction
ADK15	97	174600	ADK_cam_18_84_709005_663971_20191228	12190059	2019-11-28	2019-12-19	22	2019	12	19	7	56	35	308	4.5	Moving/feeding/foraging	No reaction
ADK15	97	174600	ADK_cam_18_84_709005_663971_20191228	12190059	2019-11-28	2019-12-19	22	2019	12	19	7	56	37	308	4.5	Moving/feeding/foraging	No reaction
ADK15	97	174600	ADK_cam_18_84_709005_663971_20191228	12190059	2019-11-28	2019-12-19	22	2019	12	19	7	56	39	308	4.5	Moving/feeding/foraging	No reaction
ADK15	97	174600	ADK_cam_18_84_709005_663971_20191228	12190059	2019-11-28	2019-12-19	22	2019	12	19	7	56	41	308	4.5	Moving/feeding/foraging	No reaction
ADK15	97	174600	ADK_cam_18_84_709005_663971_20191228	12190059	2019-11-28	2019-12-19	22	2019	12	19	7	56	43	308	4.5	Moving/feeding/foraging	No reaction
ADK15	97	174600	ADK_cam_18_84_709005_663971_20191228	12190059	2019-11-28	2019-12-19	22	2019	12	19	7	56	45	308	4.5	Moving/feeding/foraging	No reaction
ADK15	97	174600	ADK_cam_18_84_709005_663971_20191228	12190059	2019-11-28	2019-12-19	22	2019	12	19	7	56	47	308	4.5	Moving/feeding/foraging	No reaction
ADK15	97	174600	ADK_cam_18_84_709005_663971_20191228	12190059	2019-11-28	2019-12-19	22	2019	12	19	7	56	49	308	4.5	Moving/feeding/foraging	No reaction
ADK15	97	174600	ADK_cam_18_84_709005_663971_20191228	12190059	2019-11-28	2019-12-19	22	2019	12	19	7	56	51	308	4.5	Moving/feeding/foraging	No reaction
ADK15	97	174600	ADK_cam_18_84_709005_663971_20191228	12190059	2019-11-28	2019-12-19	22	2019	12	19	7	56	53	308	4.5	Moving/feeding/foraging	No reaction
ADK15	97	174600	ADK_cam_18_84_709005_663971_20191228	12190059	2019-11-28	2019-12-19	22	2019	12	19	7	57	2	309	5.5	Moving/feeding/foraging	No reaction
ADK15	97	174600	ADK_cam_18_84_709005_663971_20191228	12190059	2019-11-28	2019-12-19	22	2019	12	19	7	57	4	309	5.5	Moving/feeding/foraging	No reaction
ADK15	97	174600	ADK_cam_18_84_709005_663971_20191228	12190059	2019-11-28	2019-12-19	22	2019	12	19	7	57	6	309	5.5	Moving/feeding/foraging	No reaction
ADK15	97	174600	ADK_cam_18_84_709005_663971_20191228	12190059	2019-11-28	2019-12-19	22	2019	12	19	7	57	8	309	5.5	Moving/feeding/foraging	No reaction
ADK15	97	174600	ADK_cam_18_84_709005_663971_20191228	12190059	2019-11-28	2019-12-19	22	2019	12	19	7	57	10	309	6.5	Moving/feeding/foraging	No reaction
ADK15	97	174600	ADK_cam_18_84_709005_663971_20191228	12190059	2019-11-28	2019-12-19	22	2019	12	19	7	57	12	309	6.5	Moving/feeding/foraging	No reaction
ADK15	97	174600	ADK_cam_18_84_709005_663971_20191228	1230144	2019-11-28	2020-01-23	57	2020	1	23	7	59	39	310	9	Moving/feeding/foraging	No reaction
ADK15	97	174600	ADK_cam_18_84_709005_663971_20191228	1230144	2019-11-28	2020-01-23	57	2020	1	23	7	59	41	310	9	Moving/feeding/foraging	No reaction
ADK15	97	174600	ADK_cam_18_84_709005_663971_20191228	1230144	2019-11-28	2020-01-23	57	2020	1	23	7	59	43	310	9	Moving/feeding/foraging	No reaction
ADK15	97	174600	ADK_cam_18_84_709005_663971_20191228	1230144	2019-11-28	2020-01-23	57	2020	1	23	7	59	45	310	7.5	Moving/feeding/foraging	No reaction
ADK15	97	174600	ADK_cam_18_84_709005_663971_20191228	1230144	2019-11-28	2020-01-23	57	2020	1	23	7	59	47	310	7.5	Moving/feeding/foraging	No reaction
ADK15	97	174600	ADK_cam_18_84_709005_663971_20191228	1230144	2019-11-28	2020-01-23	57	2020	1	23	7	59	45	311	7.5	Moving/feeding/foraging	No reaction
ADK15	97	174600	ADK_cam_18_84_709005_663971_20191228	1230144	2019-11-28	2020-01-23	57	2020	1	23	7	59	47	311	7.5	Moving/feeding/foraging	No reaction
ADK15	97	174600	ADK_cam_18_84_709005_663971_20191228	1230144	2019-11-28	2020-01-23	57	2020	1	23	7	59	49	311	7.5	Moving/feeding/foraging	No reaction
ADK15	97	174600	ADK_cam_18_84_709005_663971_20191228	1230145	2019-11-28	2020-01-23	57	2020	1	23	7	59	52	312	7.5	Moving/feeding/foraging	No reaction
ADK15	97	174600	ADK_cam_18_84_709005_663971_20191228	1230145	2019-11-28	2020-01-23	57	2020	1	23	7	59	54	312	6.5	Moving/feeding/foraging	No reaction
ADK15	97	174600	ADK_cam_18_84_709005_663971_20191228	2130232	2019-11-28	2020-02-13	78	2020	2	13	7	58	21	313	6.5	Moving/feeding/foraging	No reaction
ADK15	97	174600	ADK_cam_18_84_709005_663971_20191228	2130232	2019-11-28	2020-02-13	78	2020	2	13	7	58	23	313	6.5	Moving/feeding/foraging	No reaction
ADK15	97	174600	ADK_cam_18_84_709005_663971_20191228	2130232	2019-11-28	2020-02-13	78	2020	2	13	7	58	25	313	6.5	Moving/feeding/foraging	No reaction
ADK15	97	174600	ADK_cam_18_84_709005_663971_20191228	2130233	2019-11-28	2020-02-13	78	2020	2	13	7	58	33	314	6.5	Moving/feeding/foraging	No reaction
ADK15	97	174600	ADK_cam_18_84_709005_663971_20191228	2130233	2019-11-28	2020-02-13	78	2020	2	13	7	58	35	314	7.5	Moving/feeding/foraging	No reaction
ADK15	97	174600	ADK_cam_18_84_709005_663971_20191228	2130233	2019-11-28	2020-02-13	78	2020	2	13	7	58	37	314	7.5	Moving/feeding/foraging	No reaction
ADK15	97	174600	ADK_cam_18_84_709005_663971_20191228	2210338	2019-11-28	2020-02-21	86	2020	2	21	7	53	58	315	2.5	Moving/feeding/foraging	No reaction
ADK15	97	174600	ADK_cam_18_84_709005_663971_20191228	2210338	2019-11-28	2020-02-21	86	2020	2	21	7	59	0	315	2.5	Moving/feeding/foraging	No reaction
ADK15	97	174600	ADK_cam_18_84_709005_663971_20191228	2210338	2019-11-28	2020-02-21	86	2020	2	21	7	59	2	315	2.5	Moving/feeding/foraging	No reaction
ADK15	97	174600	ADK_cam_18_84_709005_663971_20191228	3040463	2019-11-28	2020-03-04	98	2020	3	4	7	46	8	316	6.5	Moving/feeding/foraging	No reaction
ADK15	97	174600	ADK_cam_18_84_709005_663971_20191228	3040463	2019-11-28	2020-03-04	98	2020	3	4	7	46	10	316	6.5	Moving/feeding/foraging	No reaction
ADK15	97	174600	ADK_cam_18_84_709005_663971_20191228	3040463	2019-11-28	2020-03-04	98	2020	3	4	7	46	12	316	6.5	Moving/feeding/foraging	No reaction
ADK15	97	174600	ADK_cam_18_84_709005_663971_20191228	3040464	2019-11-28	2020-03-04	98	2020	3	4	7	46	15	317	7.5	Moving/feeding/foraging	No reaction
ADK15	97	174600	ADK_cam_18_84_709005_663971_20191228	3040464	2019-11-28	2020-03-04	98	2020	3	4	7	46	17	317	7.5	Moving/feeding/foraging	No reaction
ADK15	97	174600	ADK_cam_18_84_709005_663971_20191228	3040464	2019-11-28	2020-03-04	98	2020	3	4	7	46	19	317	7.5	Moving/feeding/foraging	No reaction
ADK15	97	174600	ADK_cam_18_84_709005_663971_20191228	3040464	2019-11-28	2020-03-04	98	2020	3	4	7	46	16	318	6.5	Moving/feeding/foraging	No reaction
ADK15	97	174600	ADK_cam_18_84_709005_663971_20191228	3040464	2019-11-28	2020-03-04	98	2020	3	4	7	46	18	318	6.5	Moving/feeding/foraging	No reaction
ADK15	97	174600	ADK_cam_18_84_709005_663971_20191228	3040464	2019-11-28	2020-03-04	98	2020	3	4	7	46	20	318	6.5	Moving/feeding/foraging	No reaction
ADK15	97	174600	ADK_cam_18_84_709005_663971_20191228	3040465	2019-11-28	2020-03-04	98	2020	3	4	7	46	27	319	3.5	Moving/feeding/foraging	No reaction
ADK15	89	160200	ADK_cam_18_84_709005_663971_20191228	3040465	2019-11-28	2020-03-04	98	2020	3	4	7	46	29	319	3.5	Moving/feeding/foraging	No reaction
ADK15	89	160200	ADK_cam_18_84_709005_663971_20191228	3040465	2019-11-28	2020-03-04	98	2020	3	4	7	46	31	319	3.5	Moving/feeding/foraging	No reaction
ADK15	89	160200	ADK_cam_18_84_709005_663971_20191228	3040466	2019-11-28	2020-03-04	98	2020	3	4	7	46	34	320	2.5	Moving/feeding/foraging	No reaction
ADK15	89	160200	ADK_cam_18_84_709005_663971_20191228	3040466	2019-11-28	2020-03-04	98	2020	3	4	7	46	36	320	2.5	Moving/feeding/foraging	No reaction
ADK16	89	160200	ADK_cam18_82_715021_663968_20190401	5080032	2019-04-01	2019-05-08	38	2019	5	8	7	12	34	321	1.5	Moving/feeding/foraging	No reaction
ADK16	89	160200	ADK_cam18_82_715021_663968_20190401	5080032	2019-04-01	2019-05-08	38	2019	5	8	7	12	1	322	9	Moving/feeding/foraging	No reaction
ADK16	89	160200	ADK_cam18_82_715021_663968_20190401	5080032	2019-04-01	2019-05-08	38	2019	5	8	7	12	3	322	9	Moving/feeding/foraging	No reaction
ADK16	89	160200	ADK_cam18_82_715021_663968_20190401	5080032	2019-04-01	2019-05-08	38	2019	5	8	7	12	5	322	9	Moving/feeding/foraging	No reaction
ADK16	89	160200	ADK_cam18_82_715021_663968_20190401	5080032	2019-04-01	2019-05-08	38	2019	5	8	7	12	7	322	9	Moving/feeding/foraging	No reaction
ADK16	89	160200	ADK_cam18_82_715021_663968_20190401	5310058	2019-04-01	2019-05-31	61	2019	5	31	7	38	48	323	5.5	Moving/feeding/foraging	No reaction
ADK16	89	160200	ADK_cam18_82_715021_663968_20190401	5310058	2019-04-01	2019-05-31	61	2019	5	31	7	39	1	324	4.5	Moving/feeding/foraging	No reaction
ADK16	89	160200	ADK_cam18_82_715021_663968_20190401	5310058	2019-04-01	2019-05-31	61	2019	5	31	7	39	3	324	5.5	Moving/feeding/foraging	No reaction
ADK16	89	160200	ADK_cam18_82_715021_663968_20190401	5310058	2019-04-01	2019-05-31	61	2019	5	31	7	39	5	324	5.5	Moving/feeding/foraging	No reaction
ADK16	89	160200	ADK_cam18_82_715021_663968_20190401	5310058	2019-04-01	2019-05-31	61	2019	5	31	7	39	13	325	4.5	Moving/feeding/foraging	No reaction
ADK16	89	160200	ADK_cam18_82_715021_663968_20190401	5310058	2019-04-01	2019-05-31	61	2019	5	31	7	39	15	325	4.5	Moving/feeding/foraging	No reaction
ADK16	89	160200	ADK_cam18_82_715021_663968_20190401	5310058	2019-04-01	2019-05-31	61	2019	5	31	7	39	17	325	4.5	Moving/feeding/foraging	No reaction
ADK16	89	160200	ADK_cam18_82_715021_663968_20190401	5310058	2019-04-01	2019-05-31	61	2019	5	31	7	39	19	325	4.5	Moving/feeding/foraging	No reaction
ADK16	89	160200	ADK_cam18_82_715021_663968_20190401	5310058	2019-04-01	2019-05-31	61	2019	5	31	7	39	22	325	5.5	Moving/feeding/foraging	No reaction
ADK16	89	160200	ADK_cam18_82_715021_663968_20190401	6040063	2019-04-01	2019-06-04	65	2019	6	4	7	15	31	326	5.5	Moving/feeding/foraging	No reaction
ADK16	89	160200	ADK_cam18_82_715021_663968_20190401	6040063	2019-04-01	2019-06-04	65	2019	6	4	7	15	33	326	5.5	Moving/feeding/foraging	No reaction
ADK16	89	160200	ADK_cam18_82_715021_663968_20190401	6040063	2019-04-01	2019-06-04	65	2019	6	4	7	15	35	326	5.5	Moving/feeding/foraging	No reaction
ADK16	89	160200	ADK_cam18_82_715021_663968_20190401	6040063	2019-04-01	2019-06-04	65	2019	6	4	7	15	37	326	5.5	Moving/feeding/foraging	No reaction
ADK16	89	160200	ADK_cam18_82_715021_663968_20190401	6040063	2019-04-01	2019-06-04	65	2019	6	4	7	15	39	326	5.5	Moving/feeding/foraging	No reaction
ADK16	89	160200	ADK_cam18_82_715021_663968_20190401	6040063	2019-04-01	2019-06-04	65	2019	6	4	7	15	41	326	5.5	Moving/feeding/foraging	No reaction
ADK16	89	160200	ADK_cam18_82_715021_663968_20190401	6120074	2019-04-01	2019-06-12	73	2019	6	12	7	16	26	327	5.5	Moving/feeding/foraging	No reaction
ADK16	89	160200	ADK_cam18_82_715021_663968_20190401	6120074	2019-04-01	2019-06-12	73	2019	6	12	7	16	28	327	5.5	Moving/feeding/foraging	No reaction
ADK16	89	160200	ADK_cam18_82_715021_663968_20190401	6120074	2019-04-01	2019-06-12	73	2019	6	12	7	16	30	327	5.5	Moving/feeding/foraging	No reaction
ADK16	89	160200	ADK_cam18_82_715021_663968_20190401	6120074	2019-04-01	2019-06-12	73	2019	6	12	7	16	32	327	5.5	Moving/feeding/foraging	No reaction
ADK16	89	160200	ADK_cam18_82_715021_663968_20190401	6120074	2019-04-01	2019-06-12	73	2019	6	12	7	16	34	327	5.5	Moving/feeding/foraging	No reaction
ADK16	89	160200	ADK_cam18_82_715021_663968_20190401	6120074	2019-04-01	2019-06-12	73	2019	6	12	7	16	36	327	5.5	Moving/feeding/foraging	No reaction
ADK16	89	160200	ADK_cam18_82_715021_663968_20190401	6120074	2019-04-01	2019-06-12	73	2019	6	12	7	16	38	327	5.5	Moving/feeding/foraging	No reaction
ADK16	89	160200	ADK_cam18_82_715021_663968_20190401	6120074	2019-04-01	2019-06-12	73	2019	6	12	7	16	40	327	5.5	Moving/feeding/foraging	No reaction
ADK16	89	160200	ADK_cam18_82_715021_663968_20190401	6120074	2019-04-01	2019-06-12	73	2019	6	12	7	16	42	327	5.5	Moving/feeding/foraging	No reaction
ADK16	89	160200	ADK_cam18_82_715021_663968_20190401	6290090	2019-04-01	2019-06-29	90	2019	6	29	7	1	25	328	4.5	Moving/feeding/foraging	No reaction
ADK16	89	160200	ADK_cam18_82_715021_663968_20190401	6290090	2019-04-01	2019-06-29	90	2019	6	29	7	1	27	328	4.5	Moving/feeding/foraging	No reaction
ADK16	89	160200	ADK_cam18_82_715021_663968_20190401	6290090	2019-04-01	2019-06-29	90	2019	6	29	7	1	29	328	4.5	Moving/feeding/foraging	No reaction
ADK16	89	160200	ADK_cam18_82_715021_663968_20190401	6290090	2019-04-01	2019-06-29	90	2019	6	29	7	1	31	328	4.5	Moving/feeding/foraging	No reaction
ADK16	89	160200	ADK_cam18_82_715021_663968_20190401	6290090	2019-04-01	2019-06-29	90	2019	6	29	7	1	33	328	4.5	Moving/feeding/foraging	No reaction
ADK16	89	160200	ADK_cam18_82_715021_663968_20190401	6290090	2019-04-01	2019-06-29	90	2019	6	29	7	1	35	328	4.5	Moving/feeding/foraging	No reaction
ADK16	174	313200	ADK_cam18_82_715021_663968_20190401	6290090	2019-04-01	2019-06-29	90	2019	6	29	7	1	37	328	4.5	Moving/feeding/foraging	No reaction
ADK16	174	313200	ADK_cam18_82_715021_663968_20190401	6290090	2019-04-01	2019-06-29	90	2019	6	29	7	1	39	328	4.5	Moving/feeding/foraging	No reaction
ADK16	174	313200	ADK_cam18_82_715021_663968_20190401	6290090	2019-04-01	2019-06-29	90	2019	6	29	7	1	41	328	4.5	Moving/feeding/foraging	No reaction
ADK16	174	313200	ADK_cam18_82_715021_663968_20190401	6290090	2019-04-01	2019-06-29	90	2019	6	29	7	1	43	328	4.5	Moving/feeding/foraging	No reaction
ADK17	174	313200	NA	NA	2019-04-03	#VALUE!	#VALUE!	NA	NA	NA	NA	NA	NA	NA
ADK18	174	313200	ADK_cam_18_97_693990_666976_20190908	9300055	2019-09-08	2019-09-30	23	2019	9	30	7	8	53	329	3.5	Moving/feeding/foraging	No reaction
ADK18	174	313200	ADK_cam_18_97_693990_666976_20190908	9300055	2019-09-08	2019-09-30	23	2019	9	30	7	8	55	329	3.5	Moving/feeding/foraging	No reaction
ADK18	174	313200	ADK_cam_18_97_693990_666976_20190908	9300055	2019-09-08	2019-09-30	23	2019	9	30	7	8	57	329	3.5	Moving/feeding/foraging	No reaction
ADK18	174	313200	ADK_cam_18_97_693990_666976_20190908	9300055	2019-09-08	2019-09-30	23	2019	9	30	7	9	13	330	3.5	Moving/feeding/foraging	No reaction
ADK18	174	313200	ADK_cam_18_97_693990_666976_20190908	9300055	2019-09-08	2019-09-30	23	2019	9	30	7	9	15	330	3.5	Moving/feeding/foraging	No reaction
ADK18	174	313200	ADK_cam_18_97_693990_666976_20190908	9300055	2019-09-08	2019-09-30	23	2019	9	30	7	9	17	330	3.5	Moving/feeding/foraging	No reaction
ADK18	174	313200	ADK_cam_18_97_693990_666976_20190908	9300055	2019-09-08	2019-09-30	23	2019	9	30	7	9	19	330	3.5	Moving/feeding/foraging	No reaction
ADK18	174	313200	ADK_cam_18_97_693990_666976_20190908	9300055	2019-09-08	2019-09-30	23	2019	9	30	7	9	21	330	3.5	Moving/feeding/foraging	No reaction
ADK18	174	313200	ADK_cam_18_97_693990_666976_20190908	10120103	2019-09-08	2019-10-12	35	2019	10	12	7	5	15	331	2.5	Moving/feeding/foraging	No reaction
ADK18	174	313200	ADK_cam_18_97_693990_666976_20190908	10120103	2019-09-08	2019-10-12	35	2019	10	12	7	5	17	331	2.5	Moving/feeding/foraging	No reaction
ADK18	174	313200	ADK_cam_18_97_693990_666976_20190908	10120103	2019-09-08	2019-10-12	35	2019	10	12	7	5	19	331	2.5	Moving/feeding/foraging	No reaction
ADK18	174	313200	ADK_cam_18_97_693990_666976_20190908	10120103	2019-09-08	2019-10-12	35	2019	10	12	7	5	21	331	2.5	Moving/feeding/foraging	No reaction
ADK18	174	313200	ADK_cam_18_97_693990_666976_20190908	10120103	2019-09-08	2019-10-12	35	2019	10	12	7	5	48	332	2.5	Moving/feeding/foraging	No reaction
ADK18	174	313200	ADK_cam_18_97_693990_666976_20190908	10120103	2019-09-08	2019-10-12	35	2019	10	12	7	5	50	332	2.5	Moving/feeding/foraging	No reaction
ADK18	174	313200	ADK_cam_18_97_693990_666976_20190908	11060140	2019-09-08	2019-11-06	60	2019	11	6	7	29	49	333	2.5	Moving/feeding/foraging	No reaction
ADK18	174	313200	ADK_cam_18_97_693990_666976_20190908	11060140	2019-09-08	2019-11-06	60	2019	11	6	7	29	51	333	2.5	Moving/feeding/foraging	No reaction
ADK18	174	313200	ADK_cam_18_97_693990_666976_20190908	11060140	2019-09-08	2019-11-06	60	2019	11	6	7	30	21	334	2.5	Moving/feeding/foraging	No reaction
ADK18	174	313200	ADK_cam_18_97_693990_666976_20190908	11060140	2019-09-08	2019-11-06	60	2019	11	6	7	30	23	334	2.5	Moving/feeding/foraging	No reaction
ADK18	174	313200	ADK_cam_18_97_693990_666976_20190908	11060140	2019-09-08	2019-11-06	60	2019	11	6	7	30	25	334	2.5	Moving/feeding/foraging	No reaction
ADK18	167	300600	ADK_cam_18_97_693990_666976_20190908	11060140	2019-09-08	2019-11-06	60	2019	11	6	7	30	27	334	2.5	Moving/feeding/foraging	No reaction
ADK18	167	300600	ADK_cam_18_97_693990_666976_20190908	12160228	2019-09-08	2019-12-16	100	2019	12	16	7	40	58	335	2.5	Moving/feeding/foraging	No reaction
ADK18	167	300600	ADK_cam_18_97_693990_666976_20190908	12160229	2019-09-08	2019-12-16	100	2019	12	16	7	41	19	336	4.5	Moving/feeding/foraging	No reaction
ADK18	167	300600	ADK_cam_18_97_693990_666976_20190908	12160229	2019-09-08	2019-12-16	100	2019	12	16	7	41	21	336	4.5	Moving/feeding/foraging	No reaction
ADK18	167	300600	ADK_cam_18_97_693990_666976_20190908	12160229	2019-09-08	2019-12-16	100	2019	12	16	7	41	23	336	4.5	Moving/feeding/foraging	No reaction
ADK19	167	300600	ADK_cam_18_109_699986_666994_20190907	9210022	2019-09-07	2019-09-21	15	2019	9	21	7	29	59	337	3.5	Moving/feeding/foraging	No reaction
ADK19	167	300600	ADK_cam_18_109_699986_666994_20190907	9210022	2019-09-07	2019-09-21	15	2019	9	21	7	29	1	337	2.5	Moving/feeding/foraging	No reaction
ADK19	167	300600	ADK_cam_18_109_699986_666994_20190907	9210022	2019-09-07	2019-09-21	15	2019	9	21	7	29	3	337	1.5	Moving/feeding/foraging	No reaction
ADK19	167	300600	ADK_cam_18_109_699986_666994_20190907	11150140	2019-09-07	2019-11-15	70	2019	11	15	7	35	59	338	2.5	Moving/feeding/foraging	No reaction
ADK19	167	300600	ADK_cam_18_109_699986_666994_20190907	11150140	2019-09-07	2019-11-15	70	2019	11	15	7	35	59	339	6.5	Moving/feeding/foraging	No reaction
ADK19	167	300600	ADK_cam_18_109_699986_666994_20190907	11150140	2019-09-07	2019-11-15	70	2019	11	15	7	36	1	338	5.5	Moving/feeding/foraging	No reaction
ADK19	167	300600	ADK_cam_18_109_699986_666994_20190907	11150140	2019-09-07	2019-11-15	70	2019	11	15	7	36	3	338	5.5	Moving/feeding/foraging	No reaction
ADK19	167	300600	ADK_cam_18_109_699986_666994_20190907	11150140	2019-09-07	2019-11-15	70	2019	11	15	7	36	5	338	4.5	Moving/feeding/foraging	No reaction
ADK19	167	300600	ADK_cam_18_109_699986_666994_20190907	11150140	2019-09-07	2019-11-15	70	2019	11	15	7	36	7	338	3.5	Moving/feeding/foraging	No reaction
ADK19	167	300600	ADK_cam_18_109_699986_666994_20190907	11150140	2019-09-07	2019-11-15	70	2019	11	15	7	35	59	339	9	Moving/feeding/foraging	No reaction
ADK19	167	300600	ADK_cam_18_109_699986_666994_20190907	11150140	2019-09-07	2019-11-15	70	2019	11	15	7	36	1	339	7.5	Moving/feeding/foraging	No reaction
ADK19	167	300600	ADK_cam_18_109_699986_666994_20190907	11150140	2019-09-07	2019-11-15	70	2019	11	15	7	36	3	339	7.5	Moving/feeding/foraging	No reaction
ADK19	167	300600	ADK_cam_18_109_699986_666994_20190907	11150140	2019-09-07	2019-11-15	70	2019	11	15	7	36	5	339	7.5	Moving/feeding/foraging	No reaction
ADK19	167	300600	ADK_cam_18_109_699986_666994_20190907	11150140	2019-09-07	2019-11-15	70	2019	11	15	7	36	7	339	6.5	Moving/feeding/foraging	No reaction
ADK19	167	300600	ADK_cam_18_109_699986_666994_20190907	11150140	2019-09-07	2019-11-15	70	2019	11	15	7	36	9	339	6.5	Moving/feeding/foraging	No reaction
ADK19	167	300600	ADK_cam_18_109_699986_666994_20190907	11150140	2019-09-07	2019-11-15	70	2019	11	15	7	36	11	339	6.5	Moving/feeding/foraging	No reaction
ADK19	167	300600	ADK_cam_18_109_699986_666994_20190907	11150140	2019-09-07	2019-11-15	70	2019	11	15	7	36	13	339	5.5	Moving/feeding/foraging	No reaction
ADK19	167	300600	ADK_cam_18_109_699986_666994_20190907	11150140	2019-09-07	2019-11-15	70	2019	11	15	7	36	15	339	5.5	Moving/feeding/foraging	No reaction
ADK19	167	300600	ADK_cam_18_109_699986_666994_20190907	11150140	2019-09-07	2019-11-15	70	2019	11	15	7	36	17	339	4.5	Moving/feeding/foraging	No reaction
ADK19	167	300600	ADK_cam_18_109_699986_666994_20190907	11150140	2019-09-07	2019-11-15	70	2019	11	15	7	36	19	339	4.5	Moving/feeding/foraging	No reaction
ADK19	167	300600	ADK_cam_18_109_699986_666994_20190907	11150140	2019-09-07	2019-11-15	70	2019	11	15	7	36	21	339	3.5	Moving/feeding/foraging	No reaction
ADK19	167	300600	ADK_cam_18_109_699986_666994_20190907	12020189	2019-09-07	2019-12-02	87	2019	12	2	7	35	23	340	2.5	Moving/feeding/foraging	No reaction
ADK19	167	300600	ADK_cam_18_109_699986_666994_20190907	12020189	2019-09-07	2019-12-02	87	2019	12	2	7	35	25	340	2.5	Moving/feeding/foraging	No reaction
ADK19	173	311400	ADK_cam_18_109_699986_666994_20190907	12020189	2019-09-07	2019-12-02	87	2019	12	2	7	35	27	340	1.5	Moving/feeding/foraging	No reaction
ADK19	173	311400	ADK_cam_18_109_699986_666994_20190907	12040193	2019-09-07	2019-12-04	89	2019	12	4	7	9	47	341	4.5	Moving/feeding/foraging	No reaction
ADK19	173	311400	ADK_cam_18_109_699986_666994_20190907	12040193	2019-09-07	2019-12-04	89	2019	12	4	7	9	49	341	5.5	Moving/feeding/foraging	No reaction
ADK19	173	311400	ADK_cam_18_109_699986_666994_20190907	12040193	2019-09-07	2019-12-04	89	2019	12	4	7	9	51	341	6.5	Moving/feeding/foraging	No reaction
ADK19	173	311400	ADK_cam_18_109_699986_666994_20190907	12040193	2019-09-07	2019-12-04	89	2019	12	4	7	9	53	341	6.5	Moving/feeding/foraging	No reaction
ADK20	173	311400	ADK_cam_18_114_705968_666981_20190906	9220085	2019-09-06	2019-09-22	17	2019	9	22	7	41	21	342	5.5	Moving/feeding/foraging	No reaction
ADK20	173	311400	ADK_cam_18_114_705968_666981_20190906	9220085	2019-09-06	2019-09-22	17	2019	9	22	7	41	23	342	5.5	Moving/feeding/foraging	No reaction
ADK20	173	311400	ADK_cam_18_114_705968_666981_20190906	9220085	2019-09-06	2019-09-22	17	2019	9	22	7	41	25	342	5.5	Moving/feeding/foraging	No reaction
ADK20	173	311400	ADK_cam_18_114_705968_666981_20190906	9220085	2019-09-06	2019-09-22	17	2019	9	22	7	41	27	342	5.5	Moving/feeding/foraging	No reaction
ADK20	173	311400	ADK_cam_18_114_705968_666981_20190906	9220085	2019-09-06	2019-09-22	17	2019	9	22	7	41	29	342	5.5	Moving/feeding/foraging	No reaction
ADK20	173	311400	ADK_cam_18_114_705968_666981_20190906	9230092	2019-09-06	2019-09-23	18	2019	9	23	7	43	36	343	7.5	Moving/feeding/foraging	No reaction
ADK20	173	311400	ADK_cam_18_114_705968_666981_20190906	9230092	2019-09-06	2019-09-23	18	2019	9	23	7	43	38	343	7.5	Moving/feeding/foraging	No reaction
ADK20	173	311400	ADK_cam_18_114_705968_666981_20190906	9230092	2019-09-06	2019-09-23	18	2019	9	23	7	43	40	343	7.5	Moving/feeding/foraging	No reaction
ADK20	173	311400	ADK_cam_18_114_705968_666981_20190906	9230092	2019-09-06	2019-09-23	18	2019	9	23	7	43	42	343	7.5	Moving/feeding/foraging	No reaction
ADK20	173	311400	ADK_cam_18_114_705968_666981_20190906	9230092	2019-09-06	2019-09-23	18	2019	9	23	7	43	44	343	9	Moving/feeding/foraging	No reaction
ADK20	173	311400	ADK_cam_18_114_705968_666981_20190906	9230092	2019-09-06	2019-09-23	18	2019	9	23	7	43	46	343	9	Moving/feeding/foraging	No reaction
ADK20	173	311400	ADK_cam_18_114_705968_666981_20190906	9230092	2019-09-06	2019-09-23	18	2019	9	23	7	43	48	343	9	Moving/feeding/foraging	No reaction
ADK20	173	311400	ADK_cam_18_114_705968_666981_20190906	9230092	2019-09-06	2019-09-23	18	2019	9	23	7	43	50	343	9	Moving/feeding/foraging	No reaction
ADK20	173	311400	ADK_cam_18_114_705968_666981_20190906	9230092	2019-09-06	2019-09-23	18	2019	9	23	7	43	52	343	9	Moving/feeding/foraging	No reaction
ADK20	173	311400	ADK_cam_18_114_705968_666981_20190906	9230092	2019-09-06	2019-09-23	18	2019	9	23	7	43	54	343	9	Moving/feeding/foraging	No reaction
ADK20	173	311400	ADK_cam_18_114_705968_666981_20190906	9250125	2019-09-06	2019-09-25	20	2019	9	25	7	11	51	344	11	Moving/feeding/foraging	No reaction
ADK20	173	311400	ADK_cam_18_114_705968_666981_20190906	9250125	2019-09-06	2019-09-25	20	2019	9	25	7	11	53	344	11	Moving/feeding/foraging	No reaction
ADK20	173	311400	ADK_cam_18_114_705968_666981_20190906	9250125	2019-09-06	2019-09-25	20	2019	9	25	7	11	55	344	11	Moving/feeding/foraging	No reaction
ADK20	173	311400	ADK_cam_18_114_705968_666981_20190906	9250125	2019-09-06	2019-09-25	20	2019	9	25	7	11	57	344	11	Moving/feeding/foraging	No reaction
ADK20	173	311400	ADK_cam_18_114_705968_666981_20190906	9250125	2019-09-06	2019-09-25	20	2019	9	25	7	11	59	344	11	Moving/feeding/foraging	No reaction
ADK20	173	311400	ADK_cam_18_114_705968_666981_20190906	9260152	2019-09-06	2019-09-26	21	2019	9	26	7	47	41	345	5.5	Moving/feeding/foraging	No reaction
ADK20	173	311400	ADK_cam_18_114_705968_666981_20190906	9260152	2019-09-06	2019-09-26	21	2019	9	26	7	47	43	345	4.5	Moving/feeding/foraging	No reaction
ADK20	173	311400	ADK_cam_18_114_705968_666981_20190906	9260152	2019-09-06	2019-09-26	21	2019	9	26	7	47	45	345	4.5	Moving/feeding/foraging	No reaction
ADK20	173	311400	ADK_cam_18_114_705968_666981_20190906	9260152	2019-09-06	2019-09-26	21	2019	9	26	7	47	47	345	4.5	Moving/feeding/foraging	No reaction
ADK20	173	311400	ADK_cam_18_114_705968_666981_20190906	9260152	2019-09-06	2019-09-26	21	2019	9	26	7	47	49	345	4.5	Moving/feeding/foraging	No reaction
ADK20	173	311400	ADK_cam_18_114_705968_666981_20190906	9260152	2019-09-06	2019-09-26	21	2019	9	26	7	47	51	345	4.5	Moving/feeding/foraging	No reaction
ADK20	173	311400	ADK_cam_18_114_705968_666981_20190906	9300213	2019-09-06	2019-09-30	25	2019	9	30	7	34	53	346	6.5	Moving/feeding/foraging	No reaction
ADK20	173	311400	ADK_cam_18_114_705968_666981_20190906	9300213	2019-09-06	2019-09-30	25	2019	9	30	7	34	55	346	6.5	Moving/feeding/foraging	No reaction
ADK20	173	311400	ADK_cam_18_114_705968_666981_20190906	9300213	2019-09-06	2019-09-30	25	2019	9	30	7	34	57	346	6.5	Moving/feeding/foraging	No reaction
ADK20	173	311400	ADK_cam_18_114_705968_666981_20190906	9300213	2019-09-06	2019-09-30	25	2019	9	30	7	34	59	346	6.5	Moving/feeding/foraging	No reaction
ADK20	173	311400	ADK_cam_18_114_705968_666981_20190906	10020254	2019-09-06	2019-10-02	27	2019	10	2	7	30	45	347	7.5	Moving/feeding/foraging	No reaction
ADK20	173	311400	ADK_cam_18_114_705968_666981_20190906	10020254	2019-09-06	2019-10-02	27	2019	10	2	7	30	47	347	7.5	Moving/feeding/foraging	No reaction
ADK20	173	311400	ADK_cam_18_114_705968_666981_20190906	10020254	2019-09-06	2019-10-02	27	2019	10	2	7	30	49	347	7.5	Moving/feeding/foraging	No reaction
ADK20	173	311400	ADK_cam_18_114_705968_666981_20190906	10020254	2019-09-06	2019-10-02	27	2019	10	2	7	30	51	347	7.5	Moving/feeding/foraging	No reaction
ADK20	173	311400	ADK_cam_18_114_705968_666981_20190906	10020254	2019-09-06	2019-10-02	27	2019	10	2	7	30	53	347	9	Moving/feeding/foraging	No reaction
ADK20	173	311400	ADK_cam_18_114_705968_666981_20190906	10020254	2019-09-06	2019-10-02	27	2019	10	2	7	30	55	347	9	Moving/feeding/foraging	No reaction
ADK20	173	311400	ADK_cam_18_114_705968_666981_20190906	10020255	2019-09-06	2019-10-02	27	2019	10	2	7	42	4	348	7.5	Moving/feeding/foraging	No reaction
ADK20	173	311400	ADK_cam_18_114_705968_666981_20190906	10020255	2019-09-06	2019-10-02	27	2019	10	2	7	42	6	348	7.5	Moving/feeding/foraging	No reaction
ADK20	173	311400	ADK_cam_18_114_705968_666981_20190906	10020255	2019-09-06	2019-10-02	27	2019	10	2	7	42	8	348	7.5	Moving/feeding/foraging	No reaction
ADK20	173	311400	ADK_cam_18_114_705968_666981_20190906	10020255	2019-09-06	2019-10-02	27	2019	10	2	7	42	10	348	7.5	Moving/feeding/foraging	No reaction
ADK20	173	311400	ADK_cam_18_114_705968_666981_20190906	10020255	2019-09-06	2019-10-02	27	2019	10	2	7	42	12	348	7.5	Moving/feeding/foraging	No reaction
ADK20	173	311400	ADK_cam_18_114_705968_666981_20190906	10020255	2019-09-06	2019-10-02	27	2019	10	2	7	42	14	348	7.5	Moving/feeding/foraging	No reaction
ADK20	173	311400	ADK_cam_18_114_705968_666981_20190906	10090356	2019-09-06	2019-10-09	34	2019	10	9	7	33	4	349	5.5	Moving/feeding/foraging	No reaction
ADK20	173	311400	ADK_cam_18_114_705968_666981_20190906	10090356	2019-09-06	2019-10-09	34	2019	10	9	7	33	6	349	5.5	Moving/feeding/foraging	No reaction
ADK20	173	311400	ADK_cam_18_114_705968_666981_20190906	10090356	2019-09-06	2019-10-09	34	2019	10	9	7	33	8	349	5.5	Moving/feeding/foraging	No reaction
ADK20	173	311400	ADK_cam_18_114_705968_666981_20190906	10090357	2019-09-06	2019-10-09	34	2019	10	9	7	33	13	350	5.5	Moving/feeding/foraging	No reaction
ADK20	173	311400	ADK_cam_18_114_705968_666981_20190906	10090357	2019-09-06	2019-10-09	34	2019	10	9	7	33	15	350	5.5	Moving/feeding/foraging	No reaction
ADK20	173	311400	ADK_cam_18_114_705968_666981_20190906	10090357	2019-09-06	2019-10-09	34	2019	10	9	7	33	17	350	5.5	Moving/feeding/foraging	No reaction
ADK20	173	311400	ADK_cam_18_114_705968_666981_20190906	10090358	2019-09-06	2019-10-09	34	2019	10	9	7	36	17	351	5.5	Moving/feeding/foraging	No reaction
ADK20	173	311400	ADK_cam_18_114_705968_666981_20190906	10090358	2019-09-06	2019-10-09	34	2019	10	9	7	36	19	351	5.5	Moving/feeding/foraging	No reaction
ADK20	173	311400	ADK_cam_18_114_705968_666981_20190906	10090358	2019-09-06	2019-10-09	34	2019	10	9	7	36	21	351	5.5	Moving/feeding/foraging	No reaction
ADK20	173	311400	ADK_cam_18_114_705968_666981_20190906	10090358	2019-09-06	2019-10-09	34	2019	10	9	7	36	23	351	5.5	Moving/feeding/foraging	No reaction
ADK20	173	311400	ADK_cam_18_114_705968_666981_20190906	10100373	2019-09-06	2019-10-10	35	2019	10	10	7	0	47	352	2.5	Moving/feeding/foraging	No reaction
ADK20	173	311400	ADK_cam_18_114_705968_666981_20190906	10100373	2019-09-06	2019-10-10	35	2019	10	10	7	0	49	352	3.5	Moving/feeding/foraging	No reaction
ADK20	173	311400	ADK_cam_18_114_705968_666981_20190906	10100373	2019-09-06	2019-10-10	35	2019	10	10	7	0	51	352	3.5	Moving/feeding/foraging	No reaction
ADK20	173	311400	ADK_cam_18_114_705968_666981_20190906	10100374	2019-09-06	2019-10-10	35	2019	10	10	7	1	7	353	5.5	Moving/feeding/foraging	No reaction
ADK20	173	311400	ADK_cam_18_114_705968_666981_20190906	10100374	2019-09-06	2019-10-10	35	2019	10	10	7	1	9	353	6.5	Moving/feeding/foraging	No reaction
ADK20	173	311400	ADK_cam_18_114_705968_666981_20190906	10100375	2019-09-06	2019-10-10	35	2019	10	10	7	1	39	354	7.5	Moving/feeding/foraging	No reaction
ADK20	173	311400	ADK_cam_18_114_705968_666981_20190906	10100376	2019-09-06	2019-10-10	35	2019	10	10	7	26	14	355	5.5	Moving/feeding/foraging	No reaction
ADK20	173	311400	ADK_cam_18_114_705968_666981_20190906	10100376	2019-09-06	2019-10-10	35	2019	10	10	7	26	16	355	5.5	Moving/feeding/foraging	No reaction
ADK20	173	311400	ADK_cam_18_114_705968_666981_20190906	10100376	2019-09-06	2019-10-10	35	2019	10	10	7	26	18	355	5.5	Moving/feeding/foraging	No reaction
ADK20	173	311400	ADK_cam_18_114_705968_666981_20190906	10100377	2019-09-06	2019-10-10	35	2019	10	10	7	40	52	356	3.5	Moving/feeding/foraging	No reaction
ADK20	173	311400	ADK_cam_18_114_705968_666981_20190906	10130418	2019-09-06	2019-10-13	38	2019	10	13	7	39	31	356	3.5	Moving/feeding/foraging	No reaction
ADK20	173	311400	ADK_cam_18_114_705968_666981_20190906	10130418	2019-09-06	2019-10-13	38	2019	10	13	7	39	33	356	3.5	Moving/feeding/foraging	No reaction
ADK20	173	311400	ADK_cam_18_114_705968_666981_20190906	10130418	2019-09-06	2019-10-13	38	2019	10	13	7	39	35	356	3.5	Moving/feeding/foraging	No reaction
ADK20	173	311400	ADK_cam_18_114_705968_666981_20190906	10130418	2019-09-06	2019-10-13	38	2019	10	13	7	39	31	357	1.5	Moving/feeding/foraging	No reaction
ADK20	173	311400	ADK_cam_18_114_705968_666981_20190906	10130418	2019-09-06	2019-10-13	38	2019	10	13	7	39	33	357	1.5	Moving/feeding/foraging	No reaction
ADK20	173	311400	ADK_cam_18_114_705968_666981_20190906	10130418	2019-09-06	2019-10-13	38	2019	10	13	7	39	35	357	1.5	Moving/feeding/foraging	No reaction
ADK20	173	311400	ADK_cam_18_114_705968_666981_20190906	10130419	2019-09-06	2019-10-13	38	2019	10	13	7	39	39	358	2.5	Moving/feeding/foraging	No reaction
ADK20	173	311400	ADK_cam_18_114_705968_666981_20190906	10130419	2019-09-06	2019-10-13	38	2019	10	13	7	39	41	358	3.5	Moving/feeding/foraging	No reaction
ADK20	173	311400	ADK_cam_18_114_705968_666981_20190906	10130419	2019-09-06	2019-10-13	38	2019	10	13	7	39	43	358	3.5	Moving/feeding/foraging	No reaction
ADK20	173	311400	ADK_cam_18_114_705968_666981_20190906	10130420	2019-09-06	2019-10-13	38	2019	10	13	7	39	46	359	3.5	Moving/feeding/foraging	No reaction
ADK20	173	311400	ADK_cam_18_114_705968_666981_20190906	10130420	2019-09-06	2019-10-13	38	2019	10	13	7	39	48	359	3.5	Moving/feeding/foraging	No reaction
ADK20	173	311400	ADK_cam_18_114_705968_666981_20190906	10130420	2019-09-06	2019-10-13	38	2019	10	13	7	39	50	359	3.5	Moving/feeding/foraging	No reaction
ADK20	173	311400	ADK_cam_18_114_705968_666981_20190906	10130421	2019-09-06	2019-10-13	38	2019	10	13	7	39	53	360	3.5	Moving/feeding/foraging	No reaction
ADK20	173	311400	ADK_cam_18_114_705968_666981_20190906	10130421	2019-09-06	2019-10-13	38	2019	10	13	7	39	55	360	3.5	Moving/feeding/foraging	No reaction
ADK20	173	311400	ADK_cam_18_114_705968_666981_20190906	10130421	2019-09-06	2019-10-13	38	2019	10	13	7	39	57	360	3.5	Moving/feeding/foraging	No reaction
ADK20	173	311400	ADK_cam_18_114_705968_666981_20190906	10130421	2019-09-06	2019-10-13	38	2019	10	13	7	39	58	360	6.5	Moving/feeding/foraging	No reaction
ADK20	173	311400	ADK_cam_18_114_705968_666981_20190906	10130422	2019-09-06	2019-10-13	38	2019	10	13	7	40	6	361	3.5	Moving/feeding/foraging	No reaction
ADK20	173	311400	ADK_cam_18_114_705968_666981_20190906	10130422	2019-09-06	2019-10-13	38	2019	10	13	7	40	8	361	3.5	Moving/feeding/foraging	No reaction
ADK20	173	311400	ADK_cam_18_114_705968_666981_20190906	10130422	2019-09-06	2019-10-13	38	2019	10	13	7	40	10	361	3.5	Moving/feeding/foraging	No reaction
ADK20	173	311400	ADK_cam_18_114_705968_666981_20190906	10130422	2019-09-06	2019-10-13	38	2019	10	13	7	40	6	362	6.5	Moving/feeding/foraging	No reaction
ADK20	173	311400	ADK_cam_18_114_705968_666981_20190906	10130422	2019-09-06	2019-10-13	38	2019	10	13	7	40	8	362	6.5	Moving/feeding/foraging	No reaction
ADK20	173	311400	ADK_cam_18_114_705968_666981_20190906	10130422	2019-09-06	2019-10-13	38	2019	10	13	7	40	10	362	6.5	Moving/feeding/foraging	No reaction
ADK20	173	311400	ADK_cam_18_114_705968_666981_20190906	10130423	2019-09-06	2019-10-13	38	2019	10	13	7	40	15	363	3.5	Moving/feeding/foraging	No reaction
ADK20	173	311400	ADK_cam_18_114_705968_666981_20190906	10130423	2019-09-06	2019-10-13	38	2019	10	13	7	40	17	363	3.5	Moving/feeding/foraging	No reaction
ADK20	173	311400	ADK_cam_18_114_705968_666981_20190906	10130423	2019-09-06	2019-10-13	38	2019	10	13	7	40	19	363	3.5	Moving/feeding/foraging	No reaction
ADK20	173	311400	ADK_cam_18_114_705968_666981_20190906	10130423	2019-09-06	2019-10-13	38	2019	10	13	7	40	15	364	6.5	Moving/feeding/foraging	No reaction
ADK20	173	311400	ADK_cam_18_114_705968_666981_20190906	10130423	2019-09-06	2019-10-13	38	2019	10	13	7	40	17	364	6.5	Moving/feeding/foraging	No reaction
ADK20	173	311400	ADK_cam_18_114_705968_666981_20190906	10130423	2019-09-06	2019-10-13	38	2019	10	13	7	40	19	364	6.5	Moving/feeding/foraging	No reaction
ADK20	173	311400	ADK_cam_18_114_705968_666981_20190906	10130424	2019-09-06	2019-10-13	38	2019	10	13	7	40	26	365	3.5	Moving/feeding/foraging	No reaction
ADK20	173	311400	ADK_cam_18_114_705968_666981_20190906	10130424	2019-09-06	2019-10-13	38	2019	10	13	7	40	28	365	3.5	Moving/feeding/foraging	No reaction
ADK20	173	311400	ADK_cam_18_114_705968_666981_20190906	10130424	2019-09-06	2019-10-13	38	2019	10	13	7	40	30	365	3.5	Moving/feeding/foraging	No reaction
ADK20	173	311400	ADK_cam_18_114_705968_666981_20190906	10130425	2019-09-06	2019-10-13	38	2019	10	13	7	41	17	366	6.5	Moving/feeding/foraging	No reaction
ADK20	173	311400	ADK_cam_18_114_705968_666981_20190906	10130426	2019-09-06	2019-10-13	38	2019	10	13	7	41	27	367	4.5	Moving/feeding/foraging	No reaction
ADK20	173	311400	ADK_cam_18_114_705968_666981_20190906	10130426	2019-09-06	2019-10-13	38	2019	10	13	7	41	29	367	4.5	Moving/feeding/foraging	No reaction
ADK20	173	311400	ADK_cam_18_114_705968_666981_20190906	10130426	2019-09-06	2019-10-13	38	2019	10	13	7	41	31	367	4.5	Moving/feeding/foraging	No reaction
ADK20	173	311400	ADK_cam_18_114_705968_666981_20190906	10130427	2019-09-06	2019-10-13	38	2019	10	13	7	41	35	368	4.5	Moving/feeding/foraging	No reaction
ADK20	173	311400	ADK_cam_18_114_705968_666981_20190906	10130427	2019-09-06	2019-10-13	38	2019	10	13	7	41	37	368	4.5	Moving/feeding/foraging	No reaction
ADK20	173	311400	ADK_cam_18_114_705968_666981_20190906	10130427	2019-09-06	2019-10-13	38	2019	10	13	7	41	39	368	4.5	Moving/feeding/foraging	No reaction
ADK20	173	311400	ADK_cam_18_114_705968_666981_20190906	10130428	2019-09-06	2019-10-13	38	2019	10	13	7	41	43	369	4.5	Moving/feeding/foraging	No reaction
ADK20	173	311400	ADK_cam_18_114_705968_666981_20190906	10130428	2019-09-06	2019-10-13	38	2019	10	13	7	41	45	369	4.5	Moving/feeding/foraging	No reaction
ADK20	173	311400	ADK_cam_18_114_705968_666981_20190906	10130428	2019-09-06	2019-10-13	38	2019	10	13	7	41	47	369	5.5	Moving/feeding/foraging	No reaction
ADK20	173	311400	ADK_cam_18_114_705968_666981_20190906	10130429	2019-09-06	2019-10-13	38	2019	10	13	7	41	51	370	6.5	Moving/feeding/foraging	No reaction
ADK20	173	311400	ADK_cam_18_114_705968_666981_20190906	10130429	2019-09-06	2019-10-13	38	2019	10	13	7	41	53	370	6.5	Moving/feeding/foraging	No reaction
ADK20	173	311400	ADK_cam_18_114_705968_666981_20190906	10130429	2019-09-06	2019-10-13	38	2019	10	13	7	41	55	370	6.5	Moving/feeding/foraging	No reaction
ADK20	173	311400	ADK_cam_18_114_705968_666981_20190906	10130430	2019-09-06	2019-10-13	38	2019	10	13	7	59	2	371	6.5	Moving/feeding/foraging	No reaction
ADK20	173	311400	ADK_cam_18_114_705968_666981_20190906	10130430	2019-09-06	2019-10-13	38	2019	10	13	7	59	4	371	6.5	Moving/feeding/foraging	No reaction
ADK20	173	311400	ADK_cam_18_114_705968_666981_20190906	10130430	2019-09-06	2019-10-13	38	2019	10	13	7	59	6	371	6.5	Moving/feeding/foraging	No reaction
ADK20	173	311400	ADK_cam_18_114_705968_666981_20190906	10130431	2019-09-06	2019-10-13	38	2019	10	13	7	59	24	372	4.5	Moving/feeding/foraging	No reaction
ADK20	173	311400	ADK_cam_18_114_705968_666981_20190906	10130431	2019-09-06	2019-10-13	38	2019	10	13	7	59	26	372	4.5	Moving/feeding/foraging	No reaction
ADK20	173	311400	ADK_cam_18_114_705968_666981_20190906	10130431	2019-09-06	2019-10-13	38	2019	10	13	7	59	28	372	4.5	Moving/feeding/foraging	No reaction
ADK20	173	311400	ADK_cam_18_114_705968_666981_20190906	10160452	2019-09-06	2019-10-16	41	2019	10	16	7	7	33	373	7.5	Moving/feeding/foraging	No reaction
ADK20	173	311400	ADK_cam_18_114_705968_666981_20190906	10160452	2019-09-06	2019-10-16	41	2019	10	16	7	7	35	373	7.5	Moving/feeding/foraging	No reaction
ADK20	173	311400	ADK_cam_18_114_705968_666981_20190906	10160454	2019-09-06	2019-10-16	41	2019	10	16	7	14	27	374	5.5	Moving/feeding/foraging	No reaction
ADK20	173	311400	ADK_cam_18_114_705968_666981_20190906	10160454	2019-09-06	2019-10-16	41	2019	10	16	7	14	29	374	6.5	Moving/feeding/foraging	No reaction
ADK20	173	311400	ADK_cam_18_114_705968_666981_20190906	10160455	2019-09-06	2019-10-16	41	2019	10	16	7	14	34	375	2.5	Moving/feeding/foraging	No reaction
ADK20	173	311400	ADK_cam_18_114_705968_666981_20190906	10160455	2019-09-06	2019-10-16	41	2019	10	16	7	14	36	375	2.5	Moving/feeding/foraging	No reaction
ADK20	173	311400	ADK_cam_18_114_705968_666981_20190906	10160455	2019-09-06	2019-10-16	41	2019	10	16	7	14	38	375	2.5	Moving/feeding/foraging	No reaction
ADK20	173	311400	ADK_cam_18_114_705968_666981_20190906	10160459	2019-09-06	2019-10-16	41	2019	10	16	7	16	0	376	2.5	Moving/feeding/foraging	No reaction
ADK20	173	311400	ADK_cam_18_114_705968_666981_20190906	10160459	2019-09-06	2019-10-16	41	2019	10	16	7	16	2	376	2.5	Moving/feeding/foraging	No reaction
ADK20	173	311400	ADK_cam_18_114_705968_666981_20190906	10200508	2019-09-06	2019-10-20	45	2019	10	20	7	25	21	377	9	Moving/feeding/foraging	No reaction
ADK20	173	311400	ADK_cam_18_114_705968_666981_20190906	10200508	2019-09-06	2019-10-20	45	2019	10	20	7	25	23	377	9	Moving/feeding/foraging	No reaction
ADK20	173	311400	ADK_cam_18_114_705968_666981_20190906	10200509	2019-09-06	2019-10-20	45	2019	10	20	7	39	36	378	6.5	Moving/feeding/foraging	No reaction
ADK20	173	311400	ADK_cam_18_114_705968_666981_20190906	10200509	2019-09-06	2019-10-20	45	2019	10	20	7	39	38	378	5.5	Moving/feeding/foraging	No reaction
ADK20	173	311400	ADK_cam_18_114_705968_666981_20190906	10200509	2019-09-06	2019-10-20	45	2019	10	20	7	39	40	378	5.5	Moving/feeding/foraging	No reaction
ADK20	173	311400	ADK_cam_18_114_705968_666981_20190906	10200509	2019-09-06	2019-10-20	45	2019	10	20	7	39	42	378	4.5	Moving/feeding/foraging	No reaction
ADK20	173	311400	ADK_cam_18_114_705968_666981_20190906	10200509	2019-09-06	2019-10-20	45	2019	10	20	7	39	44	378	4.5	Moving/feeding/foraging	No reaction
ADK20	173	311400	ADK_cam_18_114_705968_666981_20190906	10200509	2019-09-06	2019-10-20	45	2019	10	20	7	39	46	378	4.5	Moving/feeding/foraging	No reaction
ADK20	173	311400	ADK_cam_18_114_705968_666981_20190906	10200509	2019-09-06	2019-10-20	45	2019	10	20	7	39	48	378	3.5	Moving/feeding/foraging	No reaction
ADK20	173	311400	ADK_cam_18_114_705968_666981_20190906	10200509	2019-09-06	2019-10-20	45	2019	10	20	7	39	50	378	3.5	Moving/feeding/foraging	No reaction
ADK20	173	311400	ADK_cam_18_114_705968_666981_20190906	10200509	2019-09-06	2019-10-20	45	2019	10	20	7	39	52	378	3.5	Moving/feeding/foraging	No reaction
ADK20	173	311400	ADK_cam_18_114_705968_666981_20190906	10200509	2019-09-06	2019-10-20	45	2019	10	20	7	39	54	378	3.5	Moving/feeding/foraging	No reaction
ADK20	173	311400	ADK_cam_18_114_705968_666981_20190906	10200509	2019-09-06	2019-10-20	45	2019	10	20	7	39	56	378	3.5	Moving/feeding/foraging	No reaction
ADK20	173	311400	ADK_cam_18_114_705968_666981_20190906	10200509	2019-09-06	2019-10-20	45	2019	10	20	7	39	58	378	3.5	Moving/feeding/foraging	No reaction
ADK20	173	311400	ADK_cam_18_114_705968_666981_20190906	10200509	2019-09-06	2019-10-20	45	2019	10	20	7	40	0	378	3.5	Moving/feeding/foraging	No reaction
ADK20	173	311400	ADK_cam_18_114_705968_666981_20190906	10200509	2019-09-06	2019-10-20	45	2019	10	20	7	40	2	378	3.5	Moving/feeding/foraging	No reaction
ADK20	173	311400	ADK_cam_18_114_705968_666981_20190906	10200509	2019-09-06	2019-10-20	45	2019	10	20	7	40	4	378	3.5	Moving/feeding/foraging	No reaction
ADK20	173	311400	ADK_cam_18_114_705968_666981_20190906	10200509	2019-09-06	2019-10-20	45	2019	10	20	7	40	6	378	3.5	Moving/feeding/foraging	No reaction
ADK20	173	311400	ADK_cam_18_114_705968_666981_20190906	10200509	2019-09-06	2019-10-20	45	2019	10	20	7	40	8	378	3.5	Moving/feeding/foraging	No reaction
ADK20	173	311400	ADK_cam_18_114_705968_666981_20190906	10200509	2019-09-06	2019-10-20	45	2019	10	20	7	40	10	378	3.5	Moving/feeding/foraging	No reaction
ADK20	173	311400	ADK_cam_18_114_705968_666981_20190906	10200509	2019-09-06	2019-10-20	45	2019	10	20	7	40	12	378	3.5	Moving/feeding/foraging	No reaction
ADK20	173	311400	ADK_cam_18_114_705968_666981_20190906	10200509	2019-09-06	2019-10-20	45	2019	10	20	7	40	14	378	3.5	Moving/feeding/foraging	No reaction
ADK20	173	311400	ADK_cam_18_114_705968_666981_20190906	10200509	2019-09-06	2019-10-20	45	2019	10	20	7	40	16	378	3.5	Moving/feeding/foraging	No reaction
ADK20	173	311400	ADK_cam_18_114_705968_666981_20190906	10200509	2019-09-06	2019-10-20	45	2019	10	20	7	40	18	378	3.5	Moving/feeding/foraging	No reaction
ADK20	173	311400	ADK_cam_18_114_705968_666981_20190906	10200509	2019-09-06	2019-10-20	45	2019	10	20	7	40	20	378	3.5	Moving/feeding/foraging	No reaction
ADK20	173	311400	ADK_cam_18_114_705968_666981_20190906	10200509	2019-09-06	2019-10-20	45	2019	10	20	7	40	22	378	3.5	Moving/feeding/foraging	No reaction
ADK20	173	311400	ADK_cam_18_114_705968_666981_20190906	10200509	2019-09-06	2019-10-20	45	2019	10	20	7	40	24	378	3.5	Moving/feeding/foraging	No reaction
ADK20	173	311400	ADK_cam_18_114_705968_666981_20190906	10200509	2019-09-06	2019-10-20	45	2019	10	20	7	40	26	378	3.5	Moving/feeding/foraging	No reaction
ADK20	173	311400	ADK_cam_18_114_705968_666981_20190906	10200510	2019-09-06	2019-10-20	45	2019	10	20	7	40	44	379	1.5	Moving/feeding/foraging	No reaction
ADK20	173	311400	ADK_cam_18_114_705968_666981_20190906	10200510	2019-09-06	2019-10-20	45	2019	10	20	7	40	46	379	1.5	Moving/feeding/foraging	No reaction
ADK20	173	311400	ADK_cam_18_114_705968_666981_20190906	10200510	2019-09-06	2019-10-20	45	2019	10	20	7	40	48	379	1.5	Moving/feeding/foraging	No reaction
ADK20	173	311400	ADK_cam_18_114_705968_666981_20190906	10200510	2019-09-06	2019-10-20	45	2019	10	20	7	40	50	379	1.5	Moving/feeding/foraging	No reaction
ADK20	173	311400	ADK_cam_18_114_705968_666981_20190906	10200510	2019-09-06	2019-10-20	45	2019	10	20	7	40	52	379	1.5	Moving/feeding/foraging	No reaction
ADK20	173	311400	ADK_cam_18_114_705968_666981_20190906	10200510	2019-09-06	2019-10-20	45	2019	10	20	7	40	54	379	1.5	Moving/feeding/foraging	No reaction
ADK20	173	311400	ADK_cam_18_114_705968_666981_20190906	10200510	2019-09-06	2019-10-20	45	2019	10	20	7	40	56	379	1.5	Moving/feeding/foraging	No reaction
ADK20	173	311400	ADK_cam_18_114_705968_666981_20190906	10200510	2019-09-06	2019-10-20	45	2019	10	20	7	40	58	379	1.5	Moving/feeding/foraging	No reaction
ADK20	173	311400	ADK_cam_18_114_705968_666981_20190906	10200510	2019-09-06	2019-10-20	45	2019	10	20	7	41	0	379	1.5	Moving/feeding/foraging	No reaction
ADK20	173	311400	ADK_cam_18_114_705968_666981_20190906	10200510	2019-09-06	2019-10-20	45	2019	10	20	7	41	2	379	1.5	Moving/feeding/foraging	No reaction
ADK20	173	311400	ADK_cam_18_114_705968_666981_20190906	10200510	2019-09-06	2019-10-20	45	2019	10	20	7	41	4	379	1.5	Moving/feeding/foraging	No reaction
ADK20	173	311400	ADK_cam_18_114_705968_666981_20190906	10200510	2019-09-06	2019-10-20	45	2019	10	20	7	41	6	379	1.5	Moving/feeding/foraging	No reaction
ADK20	173	311400	ADK_cam_18_114_705968_666981_20190906	10200510	2019-09-06	2019-10-20	45	2019	10	20	7	41	8	379	1.5	Moving/feeding/foraging	No reaction
ADK20	173	311400	ADK_cam_18_114_705968_666981_20190906	10200510	2019-09-06	2019-10-20	45	2019	10	20	7	41	10	379	1.5	Moving/feeding/foraging	No reaction
ADK20	173	311400	ADK_cam_18_114_705968_666981_20190906	10200510	2019-09-06	2019-10-20	45	2019	10	20	7	41	12	379	1.5	Moving/feeding/foraging	No reaction
ADK20	173	311400	ADK_cam_18_114_705968_666981_20190906	10200510	2019-09-06	2019-10-20	45	2019	10	20	7	41	14	379	1.5	Moving/feeding/foraging	No reaction
ADK20	173	311400	ADK_cam_18_114_705968_666981_20190906	10200510	2019-09-06	2019-10-20	45	2019	10	20	7	41	16	379	1.5	Moving/feeding/foraging	No reaction
ADK20	173	311400	ADK_cam_18_114_705968_666981_20190906	10200510	2019-09-06	2019-10-20	45	2019	10	20	7	41	18	379	1.5	Moving/feeding/foraging	No reaction
ADK20	173	311400	ADK_cam_18_114_705968_666981_20190906	10200510	2019-09-06	2019-10-20	45	2019	10	20	7	41	20	379	1.5	Moving/feeding/foraging	No reaction
ADK20	173	311400	ADK_cam_18_114_705968_666981_20190906	10200510	2019-09-06	2019-10-20	45	2019	10	20	7	41	22	379	1.5	Moving/feeding/foraging	No reaction
ADK20	173	311400	ADK_cam_18_114_705968_666981_20190906	10200510	2019-09-06	2019-10-20	45	2019	10	20	7	41	24	379	1.5	Moving/feeding/foraging	No reaction
ADK20	173	311400	ADK_cam_18_114_705968_666981_20190906	10200510	2019-09-06	2019-10-20	45	2019	10	20	7	41	26	379	1.5	Moving/feeding/foraging	No reaction
ADK20	173	311400	ADK_cam_18_114_705968_666981_20190906	10200510	2019-09-06	2019-10-20	45	2019	10	20	7	41	28	379	1.5	Moving/feeding/foraging	No reaction
ADK20	173	311400	ADK_cam_18_114_705968_666981_20190906	10200510	2019-09-06	2019-10-20	45	2019	10	20	7	41	30	379	1.5	Moving/feeding/foraging	No reaction
ADK20	173	311400	ADK_cam_18_114_705968_666981_20190906	10200510	2019-09-06	2019-10-20	45	2019	10	20	7	41	32	379	1.5	Moving/feeding/foraging	No reaction
ADK20	173	311400	ADK_cam_18_114_705968_666981_20190906	10200510	2019-09-06	2019-10-20	45	2019	10	20	7	41	34	379	1.5	Moving/feeding/foraging	No reaction
ADK20	173	311400	ADK_cam_18_114_705968_666981_20190906	10200510	2019-09-06	2019-10-20	45	2019	10	20	7	41	36	379	1.5	Moving/feeding/foraging	No reaction
ADK20	173	311400	ADK_cam_18_114_705968_666981_20190906	10200510	2019-09-06	2019-10-20	45	2019	10	20	7	41	38	379	1.5	Moving/feeding/foraging	No reaction
ADK20	173	311400	ADK_cam_18_114_705968_666981_20190906	10200510	2019-09-06	2019-10-20	45	2019	10	20	7	41	40	379	1.5	Moving/feeding/foraging	No reaction
ADK20	173	311400	ADK_cam_18_114_705968_666981_20190906	10200510	2019-09-06	2019-10-20	45	2019	10	20	7	41	42	379	1.5	Moving/feeding/foraging	No reaction
ADK20	173	311400	ADK_cam_18_114_705968_666981_20190906	10260546	2019-09-06	2019-10-26	51	2019	10	26	7	22	34	380	6.5	Moving/feeding/foraging	No reaction
ADK20	173	311400	ADK_cam_18_114_705968_666981_20190906	10260546	2019-09-06	2019-10-26	51	2019	10	26	7	22	36	380	6.5	Moving/feeding/foraging	No reaction
ADK20	173	311400	ADK_cam_18_114_705968_666981_20190906	10260546	2019-09-06	2019-10-26	51	2019	10	26	7	22	38	380	6.5	Moving/feeding/foraging	No reaction
ADK20	173	311400	ADK_cam_18_114_705968_666981_20190906	10260547	2019-09-06	2019-10-26	51	2019	10	26	7	22	43	381	6.5	Moving/feeding/foraging	No reaction
ADK20	173	311400	ADK_cam_18_114_705968_666981_20190906	10260547	2019-09-06	2019-10-26	51	2019	10	26	7	22	45	381	7.5	Moving/feeding/foraging	No reaction
ADK20	173	311400	ADK_cam_18_114_705968_666981_20190906	10260547	2019-09-06	2019-10-26	51	2019	10	26	7	22	47	381	7.5	Moving/feeding/foraging	No reaction
ADK20	173	311400	ADK_cam_18_114_705968_666981_20190906	10260548	2019-09-06	2019-10-26	51	2019	10	26	7	22	52	382	9	Moving/feeding/foraging	No reaction
ADK20	173	311400	ADK_cam_18_114_705968_666981_20190906	10260548	2019-09-06	2019-10-26	51	2019	10	26	7	22	54	382	9	Moving/feeding/foraging	No reaction
ADK20	173	311400	ADK_cam_18_114_705968_666981_20190906	10260548	2019-09-06	2019-10-26	51	2019	10	26	7	22	56	382	9	Moving/feeding/foraging	No reaction
ADK20	173	311400	ADK_cam_18_114_705968_666981_20190906	10260549	2019-09-06	2019-10-26	51	2019	10	26	7	23	29	383	9	Moving/feeding/foraging	No reaction
ADK20	173	311400	ADK_cam_18_114_705968_666981_20190906	10260549	2019-09-06	2019-10-26	51	2019	10	26	7	23	31	383	9	Moving/feeding/foraging	No reaction
ADK20	173	311400	ADK_cam_18_114_705968_666981_20190906	10260549	2019-09-06	2019-10-26	51	2019	10	26	7	23	33	383	9	Moving/feeding/foraging	No reaction
ADK20	173	311400	ADK_cam_18_114_705968_666981_20190906	10260549	2019-09-06	2019-10-26	51	2019	10	26	7	23	29	384	5.5	Moving/feeding/foraging	No reaction
ADK20	173	311400	ADK_cam_18_114_705968_666981_20190906	10260549	2019-09-06	2019-10-26	51	2019	10	26	7	23	31	384	5.5	Moving/feeding/foraging	No reaction
ADK20	173	311400	ADK_cam_18_114_705968_666981_20190906	10260549	2019-09-06	2019-10-26	51	2019	10	26	7	23	33	384	5.5	Moving/feeding/foraging	No reaction
ADK20	173	311400	ADK_cam_18_114_705968_666981_20190906	10260550	2019-09-06	2019-10-26	51	2019	10	26	7	23	37	385	4.5	Moving/feeding/foraging	No reaction
ADK20	173	311400	ADK_cam_18_114_705968_666981_20190906	10260550	2019-09-06	2019-10-26	51	2019	10	26	7	23	39	385	4.5	Moving/feeding/foraging	No reaction
ADK20	173	311400	ADK_cam_18_114_705968_666981_20190906	10260550	2019-09-06	2019-10-26	51	2019	10	26	7	23	41	385	4.5	Moving/feeding/foraging	No reaction
ADK20	173	311400	ADK_cam_18_114_705968_666981_20190906	10260550	2019-09-06	2019-10-26	51	2019	10	26	7	23	37	386	9	Moving/feeding/foraging	No reaction
ADK20	173	311400	ADK_cam_18_114_705968_666981_20190906	10260550	2019-09-06	2019-10-26	51	2019	10	26	7	23	39	386	9	Moving/feeding/foraging	No reaction
ADK20	173	311400	ADK_cam_18_114_705968_666981_20190906	10260550	2019-09-06	2019-10-26	51	2019	10	26	7	23	41	386	9	Moving/feeding/foraging	No reaction
ADK20	173	311400	ADK_cam_18_114_705968_666981_20190906	10260551	2019-09-06	2019-10-26	51	2019	10	26	7	23	45	387	4.5	Moving/feeding/foraging	No reaction
ADK20	173	311400	ADK_cam_18_114_705968_666981_20190906	10260551	2019-09-06	2019-10-26	51	2019	10	26	7	23	47	387	3.5	Moving/feeding/foraging	No reaction
ADK20	173	311400	ADK_cam_18_114_705968_666981_20190906	10260551	2019-09-06	2019-10-26	51	2019	10	26	7	23	49	387	3.5	Moving/feeding/foraging	No reaction
ADK20	173	311400	ADK_cam_18_114_705968_666981_20190906	10260552	2019-09-06	2019-10-26	51	2019	10	26	7	24	0	388	6.5	Moving/feeding/foraging	No reaction
ADK20	173	311400	ADK_cam_18_114_705968_666981_20190906	10260553	2019-09-06	2019-10-26	51	2019	10	26	7	24	15	389	3.5	Moving/feeding/foraging	No reaction
ADK20	173	311400	ADK_cam_18_114_705968_666981_20190906	10260553	2019-09-06	2019-10-26	51	2019	10	26	7	24	17	389	3.5	Moving/feeding/foraging	No reaction
ADK20	173	311400	ADK_cam_18_114_705968_666981_20190906	10260553	2019-09-06	2019-10-26	51	2019	10	26	7	24	19	389	4.5	Moving/feeding/foraging	No reaction
ADK20	173	311400	ADK_cam_18_114_705968_666981_20190906	10260553	2019-09-06	2019-10-26	51	2019	10	26	7	24	15	390	5.5	Moving/feeding/foraging	No reaction
ADK20	173	311400	ADK_cam_18_114_705968_666981_20190906	10260553	2019-09-06	2019-10-26	51	2019	10	26	7	24	17	390	5.5	Moving/feeding/foraging	No reaction
ADK20	173	311400	ADK_cam_18_114_705968_666981_20190906	10260553	2019-09-06	2019-10-26	51	2019	10	26	7	24	19	390	5.5	Moving/feeding/foraging	No reaction
ADK20	173	311400	ADK_cam_18_114_705968_666981_20190906	10260554	2019-09-06	2019-10-26	51	2019	10	26	7	24	22	391	3.5	Moving/feeding/foraging	No reaction
ADK20	173	311400	ADK_cam_18_114_705968_666981_20190906	10260554	2019-09-06	2019-10-26	51	2019	10	26	7	24	24	391	3.5	Moving/feeding/foraging	No reaction
ADK20	173	311400	ADK_cam_18_114_705968_666981_20190906	10260554	2019-09-06	2019-10-26	51	2019	10	26	7	24	26	391	3.5	Moving/feeding/foraging	No reaction
ADK20	173	311400	ADK_cam_18_114_705968_666981_20190906	10260554	2019-09-06	2019-10-26	51	2019	10	26	7	24	26	392	4.5	Moving/feeding/foraging	No reaction
ADK20	173	311400	ADK_cam_18_114_705968_666981_20190906	10260554	2019-09-06	2019-10-26	51	2019	10	26	7	24	26	392	4.5	Moving/feeding/foraging	No reaction
ADK20	173	311400	ADK_cam_18_114_705968_666981_20190906	10260554	2019-09-06	2019-10-26	51	2019	10	26	7	24	26	392	4.5	Moving/feeding/foraging	No reaction
ADK20	173	311400	ADK_cam_18_114_705968_666981_20190906	10260555	2019-09-06	2019-10-26	51	2019	10	26	7	24	30	393	2.5	Moving/feeding/foraging	No reaction
ADK20	173	311400	ADK_cam_18_114_705968_666981_20190906	10260555	2019-09-06	2019-10-26	51	2019	10	26	7	24	32	393	2.5	Moving/feeding/foraging	No reaction
ADK20	173	311400	ADK_cam_18_114_705968_666981_20190906	10260555	2019-09-06	2019-10-26	51	2019	10	26	7	24	34	393	2.5	Moving/feeding/foraging	No reaction
ADK20	173	311400	ADK_cam_18_114_705968_666981_20190906	10260555	2019-09-06	2019-10-26	51	2019	10	26	7	24	30	394	5.5	Moving/feeding/foraging	No reaction
ADK20	173	311400	ADK_cam_18_114_705968_666981_20190906	10260555	2019-09-06	2019-10-26	51	2019	10	26	7	24	32	394	5.5	Moving/feeding/foraging	No reaction
ADK20	173	311400	ADK_cam_18_114_705968_666981_20190906	10260555	2019-09-06	2019-10-26	51	2019	10	26	7	24	34	394	5.5	Moving/feeding/foraging	No reaction
ADK20	173	311400	ADK_cam_18_114_705968_666981_20190906	10260556	2019-09-06	2019-10-26	51	2019	10	26	7	24	36	395	2.5	Moving/feeding/foraging	No reaction
ADK20	173	311400	ADK_cam_18_114_705968_666981_20190906	10260556	2019-09-06	2019-10-26	51	2019	10	26	7	24	36	396	5.5	Moving/feeding/foraging	No reaction
ADK20	173	311400	ADK_cam_18_114_705968_666981_20190906	10260556	2019-09-06	2019-10-26	51	2019	10	26	7	24	38	396	5.5	Moving/feeding/foraging	No reaction
ADK20	173	311400	ADK_cam_18_114_705968_666981_20190906	10260556	2019-09-06	2019-10-26	51	2019	10	26	7	24	40	396	5.5	Moving/feeding/foraging	No reaction
ADK20	173	311400	ADK_cam_18_114_705968_666981_20190906	10260557	2019-09-06	2019-10-26	51	2019	10	26	7	36	16	397	7.5	Moving/feeding/foraging	No reaction
ADK20	173	311400	ADK_cam_18_114_705968_666981_20190906	10260557	2019-09-06	2019-10-26	51	2019	10	26	7	36	18	397	7.5	Moving/feeding/foraging	No reaction
ADK20	173	311400	ADK_cam_18_114_705968_666981_20190906	10260558	2019-09-06	2019-10-26	51	2019	10	26	7	37	39	398	4.5	Moving/feeding/foraging	No reaction
ADK20	173	311400	ADK_cam_18_114_705968_666981_20190906	10260558	2019-09-06	2019-10-26	51	2019	10	26	7	37	41	398	4.5	Moving/feeding/foraging	No reaction
ADK20	173	311400	ADK_cam_18_114_705968_666981_20190906	10260558	2019-09-06	2019-10-26	51	2019	10	26	7	37	43	398	4.5	Moving/feeding/foraging	No reaction
ADK20	173	311400	ADK_cam_18_114_705968_666981_20190906	10260559	2019-09-06	2019-10-26	51	2019	10	26	7	37	47	399	2.5	Moving/feeding/foraging	No reaction
ADK20	173	311400	ADK_cam_18_114_705968_666981_20190906	10260559	2019-09-06	2019-10-26	51	2019	10	26	7	37	49	399	1.5	Moving/feeding/foraging	No reaction
ADK20	173	311400	ADK_cam_18_114_705968_666981_20190906	10260559	2019-09-06	2019-10-26	51	2019	10	26	7	37	51	399	1.5	Moving/feeding/foraging	No reaction
ADK20	173	311400	ADK_cam_18_114_705968_666981_20190906	10260560	2019-09-06	2019-10-26	51	2019	10	26	7	41	11	400	6.5	Moving/feeding/foraging	No reaction
ADK20	173	311400	ADK_cam_18_114_705968_666981_20190906	10260560	2019-09-06	2019-10-26	51	2019	10	26	7	41	13	400	7.5	Moving/feeding/foraging	No reaction
ADK20	173	311400	ADK_cam_18_114_705968_666981_20190906	10270569	2019-09-06	2019-10-27	52	2019	10	27	7	1	58	401	6.5	Moving/feeding/foraging	No reaction
ADK20	173	311400	ADK_cam_18_114_705968_666981_20190906	10270569	2019-09-06	2019-10-27	52	2019	10	27	7	2	0	401	7.5	Moving/feeding/foraging	No reaction
ADK20	173	311400	ADK_cam_18_114_705968_666981_20190906	10270569	2019-09-06	2019-10-27	52	2019	10	27	7	2	2	401	7.5	Moving/feeding/foraging	No reaction
ADK20	173	311400	ADK_cam_18_114_705968_666981_20190906	10280576	2019-09-06	2019-10-28	53	2019	10	28	7	4	1	402	7.5	Moving/feeding/foraging	No reaction
ADK20	173	311400	ADK_cam_18_114_705968_666981_20190906	10290580	2019-09-06	2019-10-29	54	2019	10	29	7	49	11	403	4.5	Moving/feeding/foraging	No reaction
ADK20	173	311400	ADK_cam_18_114_705968_666981_20190906	10290580	2019-09-06	2019-10-29	54	2019	10	29	7	49	13	403	4.5	Moving/feeding/foraging	No reaction
ADK20	173	311400	ADK_cam_18_114_705968_666981_20190906	10290580	2019-09-06	2019-10-29	54	2019	10	29	7	49	15	403	4.5	Moving/feeding/foraging	No reaction
ADK20	173	311400	ADK_cam_18_114_705968_666981_20190906	11010608	2019-09-06	2019-11-01	57	2019	11	1	7	0	3	404	3.5	Moving/feeding/foraging	No reaction
ADK20	173	311400	ADK_cam_18_114_705968_666981_20190906	12020712	2019-09-06	2019-12-02	88	2019	12	2	7	33	27	405	2.5	Moving/feeding/foraging	No reaction
ADK20	89	160200	ADK_cam_18_114_705968_666981_20190906	12020712	2019-09-06	2019-12-02	88	2019	12	2	7	33	29	405	3.5	Moving/feeding/foraging	No reaction
ADK20	89	160200	ADK_cam_18_114_705968_666981_20190906	12020712	2019-09-06	2019-12-02	88	2019	12	2	7	33	31	405	3.5	Moving/feeding/foraging	No reaction
ADK20	89	160200	ADK_cam_18_114_705968_666981_20190906	12020713	2019-09-06	2019-12-02	88	2019	12	2	7	33	34	406	4.5	Moving/feeding/foraging	No reaction
ADK20	89	160200	ADK_cam_18_114_705968_666981_20190906	12020713	2019-09-06	2019-12-02	88	2019	12	2	7	33	36	406	4.5	Moving/feeding/foraging	No reaction
ADK20	89	160200	ADK_cam_18_114_705968_666981_20190906	12020713	2019-09-06	2019-12-02	88	2019	12	2	7	33	38	406	5.5	Moving/feeding/foraging	No reaction
ADK21	89	160200	ADK_cam18_103_712011_667032_20190330	4300089	2019-03-30	2019-04-30	32	2019	4	30	7	2	29	622	6.5	Moving/feeding/foraging	No reaction
ADK21	89	160200	ADK_cam18_103_712011_667032_20190330	4300089	2019-03-30	2019-04-30	32	2019	4	30	7	2	31	622	6.5	Moving/feeding/foraging	No reaction
ADK21	89	160200	ADK_cam18_103_712011_667032_20190330	4300089	2019-03-30	2019-04-30	32	2019	4	30	7	2	33	622	6.5	Moving/feeding/foraging	No reaction
ADK21	89	160200	ADK_cam18_103_712011_667032_20190330	4300089	2019-03-30	2019-04-30	32	2019	4	30	7	2	35	622	6.5	Moving/feeding/foraging	No reaction
ADK21	89	160200	ADK_cam18_103_712011_667032_20190330	4300089	2019-03-30	2019-04-30	32	2019	4	30	7	2	37	622	6.5	Moving/feeding/foraging	No reaction
ADK21	89	160200	ADK_cam18_103_712011_667032_20190330	4300089	2019-03-30	2019-04-30	32	2019	4	30	7	2	39	622	6.5	Moving/feeding/foraging	No reaction
ADK21	89	160200	ADK_cam18_103_712011_667032_20190330	4300089	2019-03-30	2019-04-30	32	2019	4	30	7	2	41	622	6.5	Moving/feeding/foraging	No reaction
ADK21	89	160200	ADK_cam18_103_712011_667032_20190330	4300090	2019-03-30	2019-04-30	32	2019	4	30	7	3	22	623	7.5	Moving/feeding/foraging	No reaction
ADK21	89	160200	ADK_cam18_103_712011_667032_20190330	4300090	2019-03-30	2019-04-30	32	2019	4	30	7	3	24	623	7.5	Moving/feeding/foraging	No reaction
ADK21	89	160200	ADK_cam18_103_712011_667032_20190330	5180151	2019-03-30	2019-05-18	50	2019	5	18	7	46	26	624	7.5	Moving/feeding/foraging	No reaction
ADK21	89	160200	ADK_cam18_103_712011_667032_20190330	5180151	2019-03-30	2019-05-18	50	2019	5	18	7	46	28	624	7.5	Moving/feeding/foraging	No reaction
ADK21	89	160200	ADK_cam18_103_712011_667032_20190330	5180151	2019-03-30	2019-05-18	50	2019	5	18	7	46	30	624	7.5	Moving/feeding/foraging	No reaction
ADK21	89	160200	ADK_cam18_103_712011_667032_20190330	5180151	2019-03-30	2019-05-18	50	2019	5	18	7	46	32	624	7.5	Moving/feeding/foraging	No reaction
ADK21	89	160200	ADK_cam18_103_712011_667032_20190330	5180151	2019-03-30	2019-05-18	50	2019	5	18	7	46	34	624	7.5	Moving/feeding/foraging	No reaction
ADK21	89	160200	ADK_cam18_103_712011_667032_20190330	5280193	2019-03-30	2019-05-28	60	2019	5	28	7	2	41	625	4.5	Moving/feeding/foraging	No reaction
ADK21	89	160200	ADK_cam18_103_712011_667032_20190330	5280193	2019-03-30	2019-05-28	60	2019	5	28	7	2	43	625	4.5	Moving/feeding/foraging	No reaction
ADK21	89	160200	ADK_cam18_103_712011_667032_20190330	5280193	2019-03-30	2019-05-28	60	2019	5	28	7	2	45	625	4.5	Moving/feeding/foraging	No reaction
ADK21	89	160200	ADK_cam18_103_712011_667032_20190330	5280194	2019-03-30	2019-05-28	60	2019	5	28	7	2	48	626	4.5	Moving/feeding/foraging	No reaction
ADK21	89	160200	ADK_cam18_103_712011_667032_20190330	5280194	2019-03-30	2019-05-28	60	2019	5	28	7	2	50	626	4.5	Moving/feeding/foraging	No reaction
ADK21	89	160200	ADK_cam18_103_712011_667032_20190330	5280194	2019-03-30	2019-05-28	60	2019	5	28	7	2	52	626	4.5	Moving/feeding/foraging	No reaction
ADK21	89	160200	ADK_cam18_103_712011_667032_20190330	5280194	2019-03-30	2019-05-28	60	2019	5	28	7	2	48	627	9	Moving/feeding/foraging	No reaction
ADK21	89	160200	ADK_cam18_103_712011_667032_20190330	5280194	2019-03-30	2019-05-28	60	2019	5	28	7	2	50	627	9	Moving/feeding/foraging	No reaction
ADK21	89	160200	ADK_cam18_103_712011_667032_20190330	5280194	2019-03-30	2019-05-28	60	2019	5	28	7	2	52	627	9	Moving/feeding/foraging	No reaction
ADK21	89	160200	ADK_cam18_103_712011_667032_20190330	5280195	2019-03-30	2019-05-28	60	2019	5	28	7	2	56	628	9	Moving/feeding/foraging	No reaction
ADK21	89	160200	ADK_cam18_103_712011_667032_20190330	5280195	2019-03-30	2019-05-28	60	2019	5	28	7	2	58	628	9	Moving/feeding/foraging	No reaction
ADK21	89	160200	ADK_cam18_103_712011_667032_20190330	5280195	2019-03-30	2019-05-28	60	2019	5	28	7	3	0	628	9	Moving/feeding/foraging	No reaction
ADK21	89	160200	ADK_cam18_103_712011_667032_20190330	5280195	2019-03-30	2019-05-28	60	2019	5	28	7	2	56	629	4.5	Moving/feeding/foraging	No reaction
ADK21	89	160200	ADK_cam18_103_712011_667032_20190330	5280195	2019-03-30	2019-05-28	60	2019	5	28	7	2	58	629	4.5	Moving/feeding/foraging	No reaction
ADK21	89	160200	ADK_cam18_103_712011_667032_20190330	5280195	2019-03-30	2019-05-28	60	2019	5	28	7	3	0	629	4.5	Moving/feeding/foraging	No reaction
ADK21	89	160200	ADK_cam18_103_712011_667032_20190330	5300215	2019-03-30	2019-05-30	62	2019	5	30	7	5	5	630	9	Moving/feeding/foraging	No reaction
ADK21	89	160200	ADK_cam18_103_712011_667032_20190330	5300215	2019-03-30	2019-05-30	62	2019	5	30	7	5	7	630	9	Moving/feeding/foraging	No reaction
ADK21	89	160200	ADK_cam18_103_712011_667032_20190330	5300215	2019-03-30	2019-05-30	62	2019	5	30	7	5	9	630	9	Moving/feeding/foraging	No reaction
ADK21	89	160200	ADK_cam18_103_712011_667032_20190330	6010316	2019-03-30	2019-06-01	64	2019	6	1	7	3	44	631	9	Moving/feeding/foraging	No reaction
ADK21	89	160200	ADK_cam18_103_712011_667032_20190330	6010316	2019-03-30	2019-06-01	64	2019	6	1	7	3	46	631	9	Moving/feeding/foraging	No reaction
ADK21	89	160200	ADK_cam18_103_712011_667032_20190330	6010316	2019-03-30	2019-06-01	64	2019	6	1	7	3	48	631	9	Moving/feeding/foraging	No reaction
ADK21	89	160200	ADK_cam18_103_712011_667032_20190330	6010318	2019-03-30	2019-06-01	64	2019	6	1	7	5	27	632	4.5	Moving/feeding/foraging	No reaction
ADK21	89	160200	ADK_cam18_103_712011_667032_20190330	6010318	2019-03-30	2019-06-01	64	2019	6	1	7	5	29	632	4.5	Moving/feeding/foraging	No reaction
ADK21	89	160200	ADK_cam18_103_712011_667032_20190330	6010318	2019-03-30	2019-06-01	64	2019	6	1	7	5	31	632	4.5	Moving/feeding/foraging	No reaction
ADK21	89	160200	ADK_cam18_103_712011_667032_20190330	6010319	2019-03-30	2019-06-01	64	2019	6	1	7	5	43	633	4.5	Moving/feeding/foraging	No reaction
ADK21	89	160200	ADK_cam18_103_712011_667032_20190330	6010319	2019-03-30	2019-06-01	64	2019	6	1	7	5	45	633	4.5	Moving/feeding/foraging	No reaction
ADK21	89	160200	ADK_cam18_103_712011_667032_20190330	6010319	2019-03-30	2019-06-01	64	2019	6	1	7	5	47	633	4.5	Moving/feeding/foraging	No reaction
ADK21	89	160200	ADK_cam18_103_712011_667032_20190330	6010320	2019-03-30	2019-06-01	64	2019	6	1	7	5	50	634	4.5	Moving/feeding/foraging	No reaction
ADK21	89	160200	ADK_cam18_103_712011_667032_20190330	6010320	2019-03-30	2019-06-01	64	2019	6	1	7	5	52	634	4.5	Moving/feeding/foraging	No reaction
ADK21	89	160200	ADK_cam18_103_712011_667032_20190330	6010320	2019-03-30	2019-06-01	64	2019	6	1	7	5	54	634	4.5	Moving/feeding/foraging	No reaction
ADK21	89	160200	ADK_cam18_103_712011_667032_20190330	6020338	2019-03-30	2019-06-02	65	2019	6	2	7	31	15	635	9	Moving/feeding/foraging	No reaction
ADK21	89	160200	ADK_cam18_103_712011_667032_20190330	6020338	2019-03-30	2019-06-02	65	2019	6	2	7	31	15	636	9	Moving/feeding/foraging	No reaction
ADK21	89	160200	ADK_cam18_103_712011_667032_20190330	6020338	2019-03-30	2019-06-02	65	2019	6	2	7	31	17	636	9	Moving/feeding/foraging	No reaction
ADK21	89	160200	ADK_cam18_103_712011_667032_20190330	6020338	2019-03-30	2019-06-02	65	2019	6	2	7	31	19	636	9	Moving/feeding/foraging	No reaction
ADK21	89	160200	ADK_cam18_103_712011_667032_20190330	6070464	2019-03-30	2019-06-07	70	2019	6	7	7	20	8	637	7.5	Moving/feeding/foraging	No reaction
ADK21	89	160200	ADK_cam18_103_712011_667032_20190330	6070464	2019-03-30	2019-06-07	70	2019	6	7	7	20	10	637	7.5	Moving/feeding/foraging	No reaction
ADK21	89	160200	ADK_cam18_103_712011_667032_20190330	6070464	2019-03-30	2019-06-07	70	2019	6	7	7	20	12	637	7.5	Moving/feeding/foraging	No reaction
ADK21	89	160200	ADK_cam18_103_712011_667032_20190330	6130498	2019-03-30	2019-06-13	76	2019	6	13	7	5	29	638	7.5	Moving/feeding/foraging	No reaction
ADK21	89	160200	ADK_cam18_103_712011_667032_20190330	6130498	2019-03-30	2019-06-13	76	2019	6	13	7	5	31	638	7.5	Moving/feeding/foraging	No reaction
ADK21	89	160200	ADK_cam18_103_712011_667032_20190330	6130498	2019-03-30	2019-06-13	76	2019	6	13	7	5	33	638	7.5	Moving/feeding/foraging	No reaction
ADK21	89	160200	ADK_cam18_103_712011_667032_20190330	6130498	2019-03-30	2019-06-13	76	2019	6	13	7	5	29	639	3.5	Moving/feeding/foraging	No reaction
ADK21	89	160200	ADK_cam18_103_712011_667032_20190330	6130498	2019-03-30	2019-06-13	76	2019	6	13	7	5	31	639	3.5	Moving/feeding/foraging	No reaction
ADK21	89	160200	ADK_cam18_103_712011_667032_20190330	6130498	2019-03-30	2019-06-13	76	2019	6	13	7	5	33	639	3.5	Moving/feeding/foraging	No reaction
ADK21	89	160200	ADK_cam18_103_712011_667032_20190330	6130499	2019-03-30	2019-06-13	76	2019	6	13	7	5	41	640	2.5	Moving/feeding/foraging	No reaction
ADK21	89	160200	ADK_cam18_103_712011_667032_20190330	6130499	2019-03-30	2019-06-13	76	2019	6	13	7	5	43	640	2.5	Moving/feeding/foraging	No reaction
ADK21	89	160200	ADK_cam18_103_712011_667032_20190330	6130499	2019-03-30	2019-06-13	76	2019	6	13	7	5	45	640	2.5	Moving/feeding/foraging	No reaction
ADK21	89	160200	ADK_cam18_103_712011_667032_20190330	6130499	2019-03-30	2019-06-13	76	2019	6	13	7	5	41	641	6.5	Moving/feeding/foraging	No reaction
ADK21	89	160200	ADK_cam18_103_712011_667032_20190330	6130499	2019-03-30	2019-06-13	76	2019	6	13	7	5	43	641	6.5	Moving/feeding/foraging	No reaction
ADK21	89	160200	ADK_cam18_103_712011_667032_20190330	6130499	2019-03-30	2019-06-13	76	2019	6	13	7	5	45	641	6.5	Moving/feeding/foraging	No reaction
ADK21	89	160200	ADK_cam18_103_712011_667032_20190330	6130500	2019-03-30	2019-06-13	76	2019	6	13	7	6	32	642	6.5	Moving/feeding/foraging	No reaction
ADK21	89	160200	ADK_cam18_103_712011_667032_20190330	6130500	2019-03-30	2019-06-13	76	2019	6	13	7	6	34	642	6.5	Moving/feeding/foraging	No reaction
ADK21	89	160200	ADK_cam18_103_712011_667032_20190330	6130500	2019-03-30	2019-06-13	76	2019	6	13	7	6	36	642	6.5	Moving/feeding/foraging	No reaction
ADK21	89	160200	ADK_cam18_103_712011_667032_20190330	6130500	2019-03-30	2019-06-13	76	2019	6	13	7	6	32	643	1.5	Moving/feeding/foraging	No reaction
ADK21	89	160200	ADK_cam18_103_712011_667032_20190330	6130500	2019-03-30	2019-06-13	76	2019	6	13	7	6	34	643	1.5	Moving/feeding/foraging	No reaction
ADK21	89	160200	ADK_cam18_103_712011_667032_20190330	6130500	2019-03-30	2019-06-13	76	2019	6	13	7	6	36	643	1.5	Moving/feeding/foraging	No reaction
ADK21	89	160200	ADK_cam18_103_712011_667032_20190330	6130501	2019-03-30	2019-06-13	76	2019	6	13	7	6	40	644	1.5	Moving/feeding/foraging	No reaction
ADK21	89	160200	ADK_cam18_103_712011_667032_20190330	6130501	2019-03-30	2019-06-13	76	2019	6	13	7	6	42	644	1.5	Moving/feeding/foraging	No reaction
ADK21	89	160200	ADK_cam18_103_712011_667032_20190330	6130501	2019-03-30	2019-06-13	76	2019	6	13	7	6	44	644	1.5	Moving/feeding/foraging	No reaction
ADK21	89	160200	ADK_cam18_103_712011_667032_20190330	6130501	2019-03-30	2019-06-13	76	2019	6	13	7	6	40	645	6.5	Moving/feeding/foraging	No reaction
ADK21	89	160200	ADK_cam18_103_712011_667032_20190330	6130501	2019-03-30	2019-06-13	76	2019	6	13	7	6	42	645	6.5	Moving/feeding/foraging	No reaction
ADK21	89	160200	ADK_cam18_103_712011_667032_20190330	6130501	2019-03-30	2019-06-13	76	2019	6	13	7	6	44	645	6.5	Moving/feeding/foraging	No reaction
ADK21	89	160200	ADK_cam18_103_712011_667032_20190330	6130502	2019-03-30	2019-06-13	76	2019	6	13	7	6	48	646	1.5	Moving/feeding/foraging	No reaction
ADK21	89	160200	ADK_cam18_103_712011_667032_20190330	6130502	2019-03-30	2019-06-13	76	2019	6	13	7	6	50	646	1.5	Moving/feeding/foraging	No reaction
ADK21	89	160200	ADK_cam18_103_712011_667032_20190330	6130502	2019-03-30	2019-06-13	76	2019	6	13	7	6	52	646	1.5	Moving/feeding/foraging	No reaction
ADK21	89	160200	ADK_cam18_103_712011_667032_20190330	6130502	2019-03-30	2019-06-13	76	2019	6	13	7	6	48	647	6.5	Moving/feeding/foraging	No reaction
ADK21	89	160200	ADK_cam18_103_712011_667032_20190330	6130502	2019-03-30	2019-06-13	76	2019	6	13	7	6	50	647	6.5	Moving/feeding/foraging	No reaction
ADK21	89	160200	ADK_cam18_103_712011_667032_20190330	6130502	2019-03-30	2019-06-13	76	2019	6	13	7	6	52	647	6.5	Moving/feeding/foraging	No reaction
ADK21	89	160200	ADK_cam18_103_712011_667032_20190330	6130503	2019-03-30	2019-06-13	76	2019	6	13	7	6	55	648	1.5	Moving/feeding/foraging	No reaction
ADK21	89	160200	ADK_cam18_103_712011_667032_20190330	6130503	2019-03-30	2019-06-13	76	2019	6	13	7	6	57	648	1.5	Moving/feeding/foraging	No reaction
ADK21	89	160200	ADK_cam18_103_712011_667032_20190330	6130503	2019-03-30	2019-06-13	76	2019	6	13	7	6	59	648	1.5	Moving/feeding/foraging	No reaction
ADK21	89	160200	ADK_cam18_103_712011_667032_20190330	6130503	2019-03-30	2019-06-13	76	2019	6	13	7	6	55	649	7.5	Moving/feeding/foraging	No reaction
ADK21	89	160200	ADK_cam18_103_712011_667032_20190330	6130503	2019-03-30	2019-06-13	76	2019	6	13	7	6	57	649	7.5	Moving/feeding/foraging	No reaction
ADK21	89	160200	ADK_cam18_103_712011_667032_20190330	6130503	2019-03-30	2019-06-13	76	2019	6	13	7	6	59	649	7.5	Moving/feeding/foraging	No reaction
ADK21	89	160200	ADK_cam18_103_712011_667032_20190330	6130503	2019-03-30	2019-06-13	76	2019	6	13	7	6	56	650	7.5	Moving/feeding/foraging	No reaction
ADK21	89	160200	ADK_cam18_103_712011_667032_20190330	6130503	2019-03-30	2019-06-13	76	2019	6	13	7	6	58	650	7.5	Moving/feeding/foraging	No reaction
ADK21	89	160200	ADK_cam18_103_712011_667032_20190330	6130503	2019-03-30	2019-06-13	76	2019	6	13	7	7	0	650	7.5	Moving/feeding/foraging	No reaction
ADK21	89	160200	ADK_cam18_103_712011_667032_20190330	6130504	2019-03-30	2019-06-13	76	2019	6	13	7	7	4	651	2.5	Moving/feeding/foraging	No reaction
ADK21	89	160200	ADK_cam18_103_712011_667032_20190330	6130504	2019-03-30	2019-06-13	76	2019	6	13	7	7	6	651	2.5	Moving/feeding/foraging	No reaction
ADK21	89	160200	ADK_cam18_103_712011_667032_20190330	6130504	2019-03-30	2019-06-13	76	2019	6	13	7	7	8	651	2.5	Moving/feeding/foraging	No reaction
ADK21	89	160200	ADK_cam18_103_712011_667032_20190330	6130504	2019-03-30	2019-06-13	76	2019	6	13	7	7	4	652	9	Moving/feeding/foraging	No reaction
ADK21	89	160200	ADK_cam18_103_712011_667032_20190330	6130504	2019-03-30	2019-06-13	76	2019	6	13	7	7	6	652	9	Moving/feeding/foraging	No reaction
ADK21	89	160200	ADK_cam18_103_712011_667032_20190330	6130504	2019-03-30	2019-06-13	76	2019	6	13	7	7	8	652	9	Moving/feeding/foraging	No reaction
ADK21	89	160200	ADK_cam18_103_712011_667032_20190330	6130504	2019-03-30	2019-06-13	76	2019	6	13	7	7	4	653	7.5	Moving/feeding/foraging	No reaction
ADK21	89	160200	ADK_cam18_103_712011_667032_20190330	6130505	2019-03-30	2019-06-13	76	2019	6	13	7	7	11	654	2.5	Moving/feeding/foraging	No reaction
ADK21	89	160200	ADK_cam18_103_712011_667032_20190330	6130505	2019-03-30	2019-06-13	76	2019	6	13	7	7	13	654	2.5	Moving/feeding/foraging	No reaction
ADK21	89	160200	ADK_cam18_103_712011_667032_20190330	6130505	2019-03-30	2019-06-13	76	2019	6	13	7	7	15	654	2.5	Moving/feeding/foraging	No reaction
ADK21	89	160200	ADK_cam18_103_712011_667032_20190330	6130505	2019-03-30	2019-06-13	76	2019	6	13	7	7	11	655	9	Moving/feeding/foraging	No reaction
ADK21	89	160200	ADK_cam18_103_712011_667032_20190330	6130505	2019-03-30	2019-06-13	76	2019	6	13	7	7	13	655	9	Moving/feeding/foraging	No reaction
ADK21	89	160200	ADK_cam18_103_712011_667032_20190330	6130506	2019-03-30	2019-06-13	76	2019	6	13	7	8	54	656	3.5	Moving/feeding/foraging	No reaction
ADK21	89	160200	ADK_cam18_103_712011_667032_20190330	6130506	2019-03-30	2019-06-13	76	2019	6	13	7	8	56	656	3.5	Moving/feeding/foraging	No reaction
ADK21	89	160200	ADK_cam18_103_712011_667032_20190330	6130506	2019-03-30	2019-06-13	76	2019	6	13	7	8	58	656	3.5	Moving/feeding/foraging	No reaction
ADK21	89	160200	ADK_cam18_103_712011_667032_20190330	6130507	2019-03-30	2019-06-13	76	2019	6	13	7	9	5	657	3.5	Moving/feeding/foraging	No reaction
ADK21	89	160200	ADK_cam18_103_712011_667032_20190330	6130507	2019-03-30	2019-06-13	76	2019	6	13	7	9	7	657	4.5	Moving/feeding/foraging	No reaction
ADK21	89	160200	ADK_cam18_103_712011_667032_20190330	6130507	2019-03-30	2019-06-13	76	2019	6	13	7	9	9	657	4.5	Moving/feeding/foraging	No reaction
ADK21	89	160200	ADK_cam18_103_712011_667032_20190330	6130508	2019-03-30	2019-06-13	76	2019	6	13	7	9	16	658	4.5	Moving/feeding/foraging	No reaction
ADK21	89	160200	ADK_cam18_103_712011_667032_20190330	6130508	2019-03-30	2019-06-13	76	2019	6	13	7	9	18	658	4.5	Moving/feeding/foraging	No reaction
ADK21	89	160200	ADK_cam18_103_712011_667032_20190330	6130508	2019-03-30	2019-06-13	76	2019	6	13	7	9	20	658	4.5	Moving/feeding/foraging	No reaction
ADK21	89	160200	ADK_cam18_103_712011_667032_20190330	6130509	2019-03-30	2019-06-13	76	2019	6	13	7	9	32	659	4.5	Moving/feeding/foraging	No reaction
ADK21	89	160200	ADK_cam18_103_712011_667032_20190330	6130509	2019-03-30	2019-06-13	76	2019	6	13	7	9	34	659	4.5	Moving/feeding/foraging	No reaction
ADK21	89	160200	ADK_cam18_103_712011_667032_20190330	6130509	2019-03-30	2019-06-13	76	2019	6	13	7	9	36	659	4.5	Moving/feeding/foraging	No reaction
ADK21	89	160200	ADK_cam18_103_712011_667032_20190330	6130510	2019-03-30	2019-06-13	76	2019	6	13	7	9	51	660	4.5	Moving/feeding/foraging	No reaction
ADK21	89	160200	ADK_cam18_103_712011_667032_20190330	6130510	2019-03-30	2019-06-13	76	2019	6	13	7	9	53	660	4.5	Moving/feeding/foraging	No reaction
ADK21	89	160200	ADK_cam18_103_712011_667032_20190330	6130510	2019-03-30	2019-06-13	76	2019	6	13	7	9	55	660	4.5	Moving/feeding/foraging	No reaction
ADK21	89	160200	ADK_cam18_103_712011_667032_20190330	6130511	2019-03-30	2019-06-13	76	2019	6	13	7	10	25	661	3.5	Moving/feeding/foraging	No reaction
ADK21	89	160200	ADK_cam18_103_712011_667032_20190330	6130511	2019-03-30	2019-06-13	76	2019	6	13	7	10	27	661	3.5	Moving/feeding/foraging	No reaction
ADK21	89	160200	ADK_cam18_103_712011_667032_20190330	6130511	2019-03-30	2019-06-13	76	2019	6	13	7	10	29	661	3.5	Moving/feeding/foraging	No reaction
ADK21	89	160200	ADK_cam18_103_712011_667032_20190330	6130512	2019-03-30	2019-06-13	76	2019	6	13	7	10	31	662	3.5	Moving/feeding/foraging	No reaction
ADK21	89	160200	ADK_cam18_103_712011_667032_20190330	6130512	2019-03-30	2019-06-13	76	2019	6	13	7	10	31	662	3.5	Moving/feeding/foraging	No reaction
ADK21	89	160200	ADK_cam18_103_712011_667032_20190330	6130512	2019-03-30	2019-06-13	76	2019	6	13	7	10	31	662	3.5	Moving/feeding/foraging	No reaction
ADK21	89	160200	ADK_cam18_103_712011_667032_20190330	6130513	2019-03-30	2019-06-13	76	2019	6	13	7	10	48	663	3.5	Moving/feeding/foraging	No reaction
ADK21	89	160200	ADK_cam18_103_712011_667032_20190330	6130513	2019-03-30	2019-06-13	76	2019	6	13	7	10	50	663	3.5	Moving/feeding/foraging	No reaction
ADK21	89	160200	ADK_cam18_103_712011_667032_20190330	6130513	2019-03-30	2019-06-13	76	2019	6	13	7	10	52	663	3.5	Moving/feeding/foraging	No reaction
ADK21	89	160200	ADK_cam18_103_712011_667032_20190330	6130515	2019-03-30	2019-06-13	76	2019	6	13	7	12	6	664	1.5	Moving/feeding/foraging	No reaction
ADK21	89	160200	ADK_cam18_103_712011_667032_20190330	6130515	2019-03-30	2019-06-13	76	2019	6	13	7	12	8	664	1.5	Moving/feeding/foraging	No reaction
ADK21	89	160200	ADK_cam18_103_712011_667032_20190330	6130515	2019-03-30	2019-06-13	76	2019	6	13	7	12	10	664	1.5	Moving/feeding/foraging	No reaction
ADK21	89	160200	ADK_cam18_103_712011_667032_20190330	6130516	2019-03-30	2019-06-13	76	2019	6	13	7	12	15	665	1.5	Moving/feeding/foraging	No reaction
ADK21	89	160200	ADK_cam18_103_712011_667032_20190330	6130516	2019-03-30	2019-06-13	76	2019	6	13	7	12	15	665	1.5	Moving/feeding/foraging	No reaction
ADK21	89	160200	ADK_cam18_103_712011_667032_20190330	6130516	2019-03-30	2019-06-13	76	2019	6	13	7	12	15	665	1.5	Moving/feeding/foraging	No reaction
ADK21	89	160200	ADK_cam18_103_712011_667032_20190330	6130517	2019-03-30	2019-06-13	76	2019	6	13	7	12	22	666	1.5	Moving/feeding/foraging	No reaction
ADK21	89	160200	ADK_cam18_103_712011_667032_20190330	6130517	2019-03-30	2019-06-13	76	2019	6	13	7	12	22	666	1.5	Moving/feeding/foraging	No reaction
ADK21	89	160200	ADK_cam18_103_712011_667032_20190330	6130517	2019-03-30	2019-06-13	76	2019	6	13	7	12	22	666	1.5	Moving/feeding/foraging	No reaction
ADK21	89	160200	ADK_cam18_103_712011_667032_20190330	6130518	2019-03-30	2019-06-13	76	2019	6	13	7	37	48	667	7.5	Moving/feeding/foraging	No reaction
ADK21	89	160200	ADK_cam18_103_712011_667032_20190330	6130518	2019-03-30	2019-06-13	76	2019	6	13	7	37	50	667	7.5	Moving/feeding/foraging	No reaction
ADK21	89	160200	ADK_cam18_103_712011_667032_20190330	6130518	2019-03-30	2019-06-13	76	2019	6	13	7	37	52	667	7.5	Moving/feeding/foraging	No reaction
ADK21	89	160200	ADK_cam18_103_712011_667032_20190330	6130519	2019-03-30	2019-06-13	76	2019	6	13	7	38	26	668	9	Moving/feeding/foraging	No reaction
ADK21	89	160200	ADK_cam18_103_712011_667032_20190330	6130519	2019-03-30	2019-06-13	76	2019	6	13	7	38	28	668	9	Moving/feeding/foraging	No reaction
ADK21	89	160200	ADK_cam18_103_712011_667032_20190330	6130519	2019-03-30	2019-06-13	76	2019	6	13	7	38	30	668	9	Moving/feeding/foraging	No reaction
ADK21	89	160200	ADK_cam18_103_712011_667032_20190330	6130520	2019-03-30	2019-06-13	76	2019	6	13	7	40	55	669	6.5	Moving/feeding/foraging	No reaction
ADK21	89	160200	ADK_cam18_103_712011_667032_20190330	6130520	2019-03-30	2019-06-13	76	2019	6	13	7	40	57	669	6.5	Moving/feeding/foraging	No reaction
ADK21	89	160200	ADK_cam18_103_712011_667032_20190330	6130520	2019-03-30	2019-06-13	76	2019	6	13	7	40	59	669	6.5	Moving/feeding/foraging	No reaction
ADK21	89	160200	ADK_cam18_103_712011_667032_20190330	6130521	2019-03-30	2019-06-13	76	2019	6	13	7	41	16	670	6.5	Moving/feeding/foraging	No reaction
ADK21	89	160200	ADK_cam18_103_712011_667032_20190330	6130521	2019-03-30	2019-06-13	76	2019	6	13	7	41	18	670	6.5	Moving/feeding/foraging	No reaction
ADK21	89	160200	ADK_cam18_103_712011_667032_20190330	6130521	2019-03-30	2019-06-13	76	2019	6	13	7	41	20	670	6.5	Moving/feeding/foraging	No reaction
ADK21	89	160200	ADK_cam18_103_712011_667032_20190330	6170538	2019-03-30	2019-06-17	80	2019	6	17	7	33	3	671	4.5	Moving/feeding/foraging	No reaction
ADK21	89	160200	ADK_cam18_103_712011_667032_20190330	6170538	2019-03-30	2019-06-17	80	2019	6	17	7	33	5	671	4.5	Moving/feeding/foraging	No reaction
ADK21	89	160200	ADK_cam18_103_712011_667032_20190330	6170538	2019-03-30	2019-06-17	80	2019	6	17	7	33	7	671	4.5	Moving/feeding/foraging	No reaction
ADK21	89	160200	ADK_cam18_103_712011_667032_20190330	6170538	2019-03-30	2019-06-17	80	2019	6	17	7	33	3	672	9	Moving/feeding/foraging	No reaction
ADK21	89	160200	ADK_cam18_103_712011_667032_20190330	6170538	2019-03-30	2019-06-17	80	2019	6	17	7	33	5	672	9	Moving/feeding/foraging	No reaction
ADK21	89	160200	ADK_cam18_103_712011_667032_20190330	6170538	2019-03-30	2019-06-17	80	2019	6	17	7	33	7	672	9	Moving/feeding/foraging	No reaction
ADK21	89	160200	ADK_cam18_103_712011_667032_20190330	6170539	2019-03-30	2019-06-17	80	2019	6	17	7	33	23	673	9	Moving/feeding/foraging	No reaction
ADK21	89	160200	ADK_cam18_103_712011_667032_20190330	6170539	2019-03-30	2019-06-17	80	2019	6	17	7	33	25	673	9	Moving/feeding/foraging	No reaction
ADK21	89	160200	ADK_cam18_103_712011_667032_20190330	6170539	2019-03-30	2019-06-17	80	2019	6	17	7	33	27	673	9	Moving/feeding/foraging	No reaction
ADK21	89	160200	ADK_cam18_103_712011_667032_20190330	6170539	2019-03-30	2019-06-17	80	2019	6	17	7	33	23	674	3.5	Moving/feeding/foraging	No reaction
ADK21	89	160200	ADK_cam18_103_712011_667032_20190330	6170539	2019-03-30	2019-06-17	80	2019	6	17	7	33	25	674	3.5	Moving/feeding/foraging	No reaction
ADK21	89	160200	ADK_cam18_103_712011_667032_20190330	6170539	2019-03-30	2019-06-17	80	2019	6	17	7	33	27	674	3.5	Moving/feeding/foraging	No reaction
ADK21	89	160200	ADK_cam18_103_712011_667032_20190330	6170540	2019-03-30	2019-06-17	80	2019	6	17	7	33	33	675	9	Moving/feeding/foraging	No reaction
ADK21	89	160200	ADK_cam18_103_712011_667032_20190330	6170540	2019-03-30	2019-06-17	80	2019	6	17	7	33	35	675	9	Moving/feeding/foraging	No reaction
ADK21	89	160200	ADK_cam18_103_712011_667032_20190330	6170540	2019-03-30	2019-06-17	80	2019	6	17	7	33	37	675	9	Moving/feeding/foraging	No reaction
ADK21	89	160200	ADK_cam18_103_712011_667032_20190330	6170540	2019-03-30	2019-06-17	80	2019	6	17	7	33	33	676	3.5	Moving/feeding/foraging	No reaction
ADK21	89	160200	ADK_cam18_103_712011_667032_20190330	6170540	2019-03-30	2019-06-17	80	2019	6	17	7	33	35	676	3.5	Moving/feeding/foraging	No reaction
ADK21	89	160200	ADK_cam18_103_712011_667032_20190330	6170540	2019-03-30	2019-06-17	80	2019	6	17	7	33	37	676	3.5	Moving/feeding/foraging	No reaction
ADK21	89	160200	ADK_cam18_103_712011_667032_20190330	6170541	2019-03-30	2019-06-17	80	2019	6	17	7	34	34	677	1.5	Moving/feeding/foraging	No reaction
ADK21	89	160200	ADK_cam18_103_712011_667032_20190330	6170541	2019-03-30	2019-06-17	80	2019	6	17	7	34	36	677	1.5	Moving/feeding/foraging	No reaction
ADK21	89	160200	ADK_cam18_103_712011_667032_20190330	6170541	2019-03-30	2019-06-17	80	2019	6	17	7	34	38	677	1.5	Moving/feeding/foraging	No reaction
ADK21	89	160200	ADK_cam18_103_712011_667032_20190330	6170542	2019-03-30	2019-06-17	80	2019	6	17	7	34	41	678	1.5	Moving/feeding/foraging	No reaction
ADK21	89	160200	ADK_cam18_103_712011_667032_20190330	6170542	2019-03-30	2019-06-17	80	2019	6	17	7	34	43	678	1.5	Moving/feeding/foraging	No reaction
ADK21	89	160200	ADK_cam18_103_712011_667032_20190330	6170542	2019-03-30	2019-06-17	80	2019	6	17	7	34	45	678	1.5	Moving/feeding/foraging	No reaction
ADK21	89	160200	ADK_cam18_103_712011_667032_20190330	6170542	2019-03-30	2019-06-17	80	2019	6	17	7	34	41	679	9	Moving/feeding/foraging	No reaction
ADK21	89	160200	ADK_cam18_103_712011_667032_20190330	6170542	2019-03-30	2019-06-17	80	2019	6	17	7	34	43	679	9	Moving/feeding/foraging	No reaction
ADK21	89	160200	ADK_cam18_103_712011_667032_20190330	6170542	2019-03-30	2019-06-17	80	2019	6	17	7	34	45	679	9	Moving/feeding/foraging	No reaction
ADK21	89	160200	ADK_cam18_103_712011_667032_20190330	6170543	2019-03-30	2019-06-17	80	2019	6	17	7	34	48	680	1.5	Moving/feeding/foraging	No reaction
ADK21	89	160200	ADK_cam18_103_712011_667032_20190330	6170543	2019-03-30	2019-06-17	80	2019	6	17	7	34	50	680	1.5	Moving/feeding/foraging	No reaction
ADK21	89	160200	ADK_cam18_103_712011_667032_20190330	6170543	2019-03-30	2019-06-17	80	2019	6	17	7	34	52	680	1.5	Moving/feeding/foraging	No reaction
ADK21	89	160200	ADK_cam18_103_712011_667032_20190330	6170543	2019-03-30	2019-06-17	80	2019	6	17	7	34	48	681	7.5	Moving/feeding/foraging	No reaction
ADK21	89	160200	ADK_cam18_103_712011_667032_20190330	6170543	2019-03-30	2019-06-17	80	2019	6	17	7	34	50	681	7.5	Moving/feeding/foraging	No reaction
ADK21	89	160200	ADK_cam18_103_712011_667032_20190330	6170543	2019-03-30	2019-06-17	80	2019	6	17	7	34	52	681	7.5	Moving/feeding/foraging	No reaction
ADK21	89	160200	ADK_cam18_103_712011_667032_20190330	6170544	2019-03-30	2019-06-17	80	2019	6	17	7	34	56	682	2.5	Moving/feeding/foraging	No reaction
ADK21	89	160200	ADK_cam18_103_712011_667032_20190330	6170544	2019-03-30	2019-06-17	80	2019	6	17	7	34	58	682	2.5	Moving/feeding/foraging	No reaction
ADK21	89	160200	ADK_cam18_103_712011_667032_20190330	6170544	2019-03-30	2019-06-17	80	2019	6	17	7	35	0	682	2.5	Moving/feeding/foraging	No reaction
ADK21	89	160200	ADK_cam18_103_712011_667032_20190330	6170544	2019-03-30	2019-06-17	80	2019	6	17	7	34	56	683	5.5	Moving/feeding/foraging	No reaction
ADK21	89	160200	ADK_cam18_103_712011_667032_20190330	6170544	2019-03-30	2019-06-17	80	2019	6	17	7	34	58	683	5.5	Moving/feeding/foraging	No reaction
ADK21	89	160200	ADK_cam18_103_712011_667032_20190330	6170544	2019-03-30	2019-06-17	80	2019	6	17	7	35	0	683	5.5	Moving/feeding/foraging	No reaction
ADK21	89	160200	ADK_cam18_103_712011_667032_20190330	6170545	2019-03-30	2019-06-17	80	2019	6	17	7	35	4	684	2.5	Moving/feeding/foraging	No reaction
ADK21	89	160200	ADK_cam18_103_712011_667032_20190330	6170545	2019-03-30	2019-06-17	80	2019	6	17	7	35	6	684	2.5	Moving/feeding/foraging	No reaction
ADK21	89	160200	ADK_cam18_103_712011_667032_20190330	6170545	2019-03-30	2019-06-17	80	2019	6	17	7	35	8	684	2.5	Moving/feeding/foraging	No reaction
ADK21	89	160200	ADK_cam18_103_712011_667032_20190330	6170545	2019-03-30	2019-06-17	80	2019	6	17	7	35	4	685	4.5	Moving/feeding/foraging	No reaction
ADK21	89	160200	ADK_cam18_103_712011_667032_20190330	6170545	2019-03-30	2019-06-17	80	2019	6	17	7	35	6	685	4.5	Moving/feeding/foraging	No reaction
ADK21	89	160200	ADK_cam18_103_712011_667032_20190330	6170545	2019-03-30	2019-06-17	80	2019	6	17	7	35	8	685	4.5	Moving/feeding/foraging	No reaction
ADK21	89	160200	ADK_cam18_103_712011_667032_20190330	6170546	2019-03-30	2019-06-17	80	2019	6	17	7	35	11	686	2.5	Moving/feeding/foraging	No reaction
ADK21	89	160200	ADK_cam18_103_712011_667032_20190330	6170546	2019-03-30	2019-06-17	80	2019	6	17	7	35	13	686	2.5	Moving/feeding/foraging	No reaction
ADK21	89	160200	ADK_cam18_103_712011_667032_20190330	6170546	2019-03-30	2019-06-17	80	2019	6	17	7	35	15	686	2.5	Moving/feeding/foraging	No reaction
ADK21	89	160200	ADK_cam18_103_712011_667032_20190330	6170546	2019-03-30	2019-06-17	80	2019	6	17	7	35	11	687	3.5	Moving/feeding/foraging	No reaction
ADK21	89	160200	ADK_cam18_103_712011_667032_20190330	6170546	2019-03-30	2019-06-17	80	2019	6	17	7	35	13	687	3.5	Moving/feeding/foraging	No reaction
ADK21	89	160200	ADK_cam18_103_712011_667032_20190330	6170546	2019-03-30	2019-06-17	80	2019	6	17	7	35	15	687	3.5	Moving/feeding/foraging	No reaction
ADK21	89	160200	ADK_cam18_103_712011_667032_20190330	6170547	2019-03-30	2019-06-17	80	2019	6	17	7	35	18	688	2.5	Moving/feeding/foraging	No reaction
ADK21	89	160200	ADK_cam18_103_712011_667032_20190330	6170547	2019-03-30	2019-06-17	80	2019	6	17	7	35	18	689	3.5	Moving/feeding/foraging	No reaction
ADK21	89	160200	ADK_cam18_103_712011_667032_20190330	6170547	2019-03-30	2019-06-17	80	2019	6	17	7	35	20	689	3.5	Moving/feeding/foraging	No reaction
ADK21	89	160200	ADK_cam18_103_712011_667032_20190330	6170547	2019-03-30	2019-06-17	80	2019	6	17	7	35	22	689	3.5	Moving/feeding/foraging	No reaction
ADK21	89	160200	ADK_cam18_103_712011_667032_20190330	6170549	2019-03-30	2019-06-17	80	2019	6	17	7	35	38	690	1.5	Moving/feeding/foraging	No reaction
ADK21	89	160200	ADK_cam18_103_712011_667032_20190330	6170549	2019-03-30	2019-06-17	80	2019	6	17	7	35	40	690	1.5	Moving/feeding/foraging	No reaction
ADK21	89	160200	ADK_cam18_103_712011_667032_20190330	6170549	2019-03-30	2019-06-17	80	2019	6	17	7	35	42	690	1.5	Moving/feeding/foraging	No reaction
ADK21	89	160200	ADK_cam18_103_712011_667032_20190330	6170550	2019-03-30	2019-06-17	80	2019	6	17	7	36	45	691	1.5	Moving/feeding/foraging	No reaction
ADK21	89	160200	ADK_cam18_103_712011_667032_20190330	6170550	2019-03-30	2019-06-17	80	2019	6	17	7	36	47	691	1.5	Moving/feeding/foraging	No reaction
ADK21	89	160200	ADK_cam18_103_712011_667032_20190330	6170550	2019-03-30	2019-06-17	80	2019	6	17	7	36	49	691	1.5	Moving/feeding/foraging	No reaction
ADK21	89	160200	ADK_cam18_103_712011_667032_20190330	6190563	2019-03-30	2019-06-19	82	2019	6	19	7	42	11	692	7.5	Moving/feeding/foraging	No reaction
ADK21	89	160200	ADK_cam18_103_712011_667032_20190330	6190563	2019-03-30	2019-06-19	82	2019	6	19	7	42	13	692	7.5	Moving/feeding/foraging	No reaction
ADK21	89	160200	ADK_cam18_103_712011_667032_20190330	6190563	2019-03-30	2019-06-19	82	2019	6	19	7	42	15	692	7.5	Moving/feeding/foraging	No reaction
ADK21	89	160200	ADK_cam18_103_712011_667032_20190330	6190564	2019-03-30	2019-06-19	82	2019	6	19	7	42	25	693	7.5	Moving/feeding/foraging	No reaction
ADK21	89	160200	ADK_cam18_103_712011_667032_20190330	6190564	2019-03-30	2019-06-19	82	2019	6	19	7	42	27	693	7.5	Moving/feeding/foraging	No reaction
ADK21	89	160200	ADK_cam18_103_712011_667032_20190330	6190564	2019-03-30	2019-06-19	82	2019	6	19	7	42	29	693	7.5	Moving/feeding/foraging	No reaction
ADK21	89	160200	ADK_cam18_103_712011_667032_20190330	6190564	2019-03-30	2019-06-19	82	2019	6	19	7	42	25	694	9	Moving/feeding/foraging	No reaction
ADK21	89	160200	ADK_cam18_103_712011_667032_20190330	6190564	2019-03-30	2019-06-19	82	2019	6	19	7	42	27	694	9	Moving/feeding/foraging	No reaction
ADK21	89	160200	ADK_cam18_103_712011_667032_20190330	6190564	2019-03-30	2019-06-19	82	2019	6	19	7	42	29	694	9	Moving/feeding/foraging	No reaction
ADK21	89	160200	ADK_cam18_103_712011_667032_20190330	6190565	2019-03-30	2019-06-19	82	2019	6	19	7	47	33	695	9	Moving/feeding/foraging	No reaction
ADK21	89	160200	ADK_cam18_103_712011_667032_20190330	6190565	2019-03-30	2019-06-19	82	2019	6	19	7	47	35	695	9	Moving/feeding/foraging	No reaction
ADK21	89	160200	ADK_cam18_103_712011_667032_20190330	6190565	2019-03-30	2019-06-19	82	2019	6	19	7	47	37	695	9	Moving/feeding/foraging	No reaction
ADK21	89	160200	ADK_cam18_103_712011_667032_20190330	6190565	2019-03-30	2019-06-19	82	2019	6	19	7	47	34	696	11	Moving/feeding/foraging	No reaction
ADK21	89	160200	ADK_cam18_103_712011_667032_20190330	6190565	2019-03-30	2019-06-19	82	2019	6	19	7	47	36	696	11	Moving/feeding/foraging	No reaction
ADK21	89	160200	ADK_cam18_103_712011_667032_20190330	6190566	2019-03-30	2019-06-19	82	2019	6	19	7	54	3	697	11	Moving/feeding/foraging	No reaction
ADK21	89	160200	ADK_cam18_103_712011_667032_20190330	6190566	2019-03-30	2019-06-19	82	2019	6	19	7	54	5	697	11	Moving/feeding/foraging	No reaction
ADK21	89	160200	ADK_cam18_103_712011_667032_20190330	6240654	2019-03-30	2019-06-24	87	2019	6	24	7	40	28	698	3.5	Moving/feeding/foraging	No reaction
ADK21	89	160200	ADK_cam18_103_712011_667032_20190330	6240654	2019-03-30	2019-06-24	87	2019	6	24	7	40	30	698	3.5	Moving/feeding/foraging	No reaction
ADK21	89	160200	ADK_cam18_103_712011_667032_20190330	6240654	2019-03-30	2019-06-24	87	2019	6	24	7	40	32	698	3.5	Moving/feeding/foraging	No reaction
ADK21	89	160200	ADK_cam18_103_712011_667032_20190330	6240654	2019-03-30	2019-06-24	87	2019	6	24	7	40	28	699	7.5	Moving/feeding/foraging	No reaction
ADK21	89	160200	ADK_cam18_103_712011_667032_20190330	6240654	2019-03-30	2019-06-24	87	2019	6	24	7	40	30	699	7.5	Moving/feeding/foraging	No reaction
ADK21	89	160200	ADK_cam18_103_712011_667032_20190330	6240654	2019-03-30	2019-06-24	87	2019	6	24	7	40	32	699	7.5	Moving/feeding/foraging	No reaction
ADK21	89	160200	ADK_cam18_103_712011_667032_20190330	6240655	2019-03-30	2019-06-24	87	2019	6	24	7	40	36	700	3.5	Moving/feeding/foraging	No reaction
ADK21	89	160200	ADK_cam18_103_712011_667032_20190330	6240655	2019-03-30	2019-06-24	87	2019	6	24	7	40	38	700	3.5	Moving/feeding/foraging	No reaction
ADK21	89	160200	ADK_cam18_103_712011_667032_20190330	6240655	2019-03-30	2019-06-24	87	2019	6	24	7	40	40	700	3.5	Moving/feeding/foraging	No reaction
ADK21	89	160200	ADK_cam18_103_712011_667032_20190330	6240655	2019-03-30	2019-06-24	87	2019	6	24	7	40	36	701	7.5	Moving/feeding/foraging	No reaction
ADK21	89	160200	ADK_cam18_103_712011_667032_20190330	6240655	2019-03-30	2019-06-24	87	2019	6	24	7	40	38	701	7.5	Moving/feeding/foraging	No reaction
ADK21	89	160200	ADK_cam18_103_712011_667032_20190330	6240655	2019-03-30	2019-06-24	87	2019	6	24	7	40	40	701	7.5	Moving/feeding/foraging	No reaction
ADK21	89	160200	ADK_cam18_103_712011_667032_20190330	6240656	2019-03-30	2019-06-24	87	2019	6	24	7	40	47	702	6.5	Moving/feeding/foraging	No reaction
ADK21	89	160200	ADK_cam18_103_712011_667032_20190330	6240656	2019-03-30	2019-06-24	87	2019	6	24	7	40	49	702	6.5	Moving/feeding/foraging	No reaction
ADK21	89	160200	ADK_cam18_103_712011_667032_20190330	6240656	2019-03-30	2019-06-24	87	2019	6	24	7	40	51	702	6.5	Moving/feeding/foraging	No reaction
ADK21	89	160200	ADK_cam18_103_712011_667032_20190330	6240658	2019-03-30	2019-06-24	87	2019	6	24	7	45	8	703	1.5	Moving/feeding/foraging	No reaction
ADK21	89	160200	ADK_cam18_103_712011_667032_20190330	6240658	2019-03-30	2019-06-24	87	2019	6	24	7	45	10	703	1.5	Moving/feeding/foraging	No reaction
ADK21	89	160200	ADK_cam18_103_712011_667032_20190330	6240658	2019-03-30	2019-06-24	87	2019	6	24	7	45	12	703	1.5	Moving/feeding/foraging	No reaction
ADK21	89	160200	ADK_cam18_103_712011_667032_20190330	6280725	2019-03-30	2019-06-28	91	2019	6	28	7	55	56	704	3.5	Moving/feeding/foraging	No reaction
ADK21	89	160200	ADK_cam18_103_712011_667032_20190330	6280725	2019-03-30	2019-06-28	91	2019	6	28	7	55	58	704	3.5	Moving/feeding/foraging	No reaction
ADK21	89	160200	ADK_cam18_103_712011_667032_20190330	6280725	2019-03-30	2019-06-28	91	2019	6	28	7	56	0	704	3.5	Moving/feeding/foraging	No reaction
ADK21	89	160200	ADK_cam18_103_712011_667032_20190330	6280726	2019-03-30	2019-06-28	91	2019	6	28	7	56	10	705	3.5	Moving/feeding/foraging	No reaction
ADK21	89	160200	ADK_cam18_103_712011_667032_20190330	6280726	2019-03-30	2019-06-28	91	2019	6	28	7	56	12	705	3.5	Moving/feeding/foraging	No reaction
ADK21	89	160200	ADK_cam18_103_712011_667032_20190330	6280726	2019-03-30	2019-06-28	91	2019	6	28	7	56	14	705	3.5	Moving/feeding/foraging	No reaction
ADK21	89	160200	ADK_cam18_103_712011_667032_20190330	6280726	2019-03-30	2019-06-28	91	2019	6	28	7	56	10	706	7.5	Moving/feeding/foraging	No reaction
ADK21	89	160200	ADK_cam18_103_712011_667032_20190330	6280726	2019-03-30	2019-06-28	91	2019	6	28	7	56	12	706	7.5	Moving/feeding/foraging	No reaction
ADK21	89	160200	ADK_cam18_103_712011_667032_20190330	6280726	2019-03-30	2019-06-28	91	2019	6	28	7	56	14	706	7.5	Moving/feeding/foraging	No reaction
ADK21	89	160200	ADK_cam18_103_712011_667032_20190330	6280727	2019-03-30	2019-06-28	91	2019	6	28	7	56	17	707	3.5	Moving/feeding/foraging	No reaction
ADK21	89	160200	ADK_cam18_103_712011_667032_20190330	6280727	2019-03-30	2019-06-28	91	2019	6	28	7	56	19	707	3.5	Moving/feeding/foraging	No reaction
ADK21	89	160200	ADK_cam18_103_712011_667032_20190330	6280727	2019-03-30	2019-06-28	91	2019	6	28	7	56	21	707	3.5	Moving/feeding/foraging	No reaction
ADK21	89	160200	ADK_cam18_103_712011_667032_20190330	6280727	2019-03-30	2019-06-28	91	2019	6	28	7	56	17	708	7.5	Moving/feeding/foraging	No reaction
ADK21	89	160200	ADK_cam18_103_712011_667032_20190330	6280727	2019-03-30	2019-06-28	91	2019	6	28	7	56	19	708	7.5	Moving/feeding/foraging	No reaction
ADK21	89	160200	ADK_cam18_103_712011_667032_20190330	6280727	2019-03-30	2019-06-28	91	2019	6	28	7	56	21	708	7.5	Moving/feeding/foraging	No reaction
ADK21	89	160200	ADK_cam18_103_712011_667032_20190330	6280728	2019-03-30	2019-06-28	91	2019	6	28	7	56	24	709	2.5	Moving/feeding/foraging	No reaction
ADK21	89	160200	ADK_cam18_103_712011_667032_20190330	6280728	2019-03-30	2019-06-28	91	2019	6	28	7	56	26	709	2.5	Moving/feeding/foraging	No reaction
ADK21	89	160200	ADK_cam18_103_712011_667032_20190330	6280728	2019-03-30	2019-06-28	91	2019	6	28	7	56	28	709	2.5	Moving/feeding/foraging	No reaction
ADK21	89	160200	ADK_cam18_103_712011_667032_20190330	6280728	2019-03-30	2019-06-28	91	2019	6	28	7	56	24	710	7.5	Moving/feeding/foraging	No reaction
ADK21	89	160200	ADK_cam18_103_712011_667032_20190330	6280728	2019-03-30	2019-06-28	91	2019	6	28	7	56	26	710	7.5	Moving/feeding/foraging	No reaction
ADK21	89	160200	ADK_cam18_103_712011_667032_20190330	6280728	2019-03-30	2019-06-28	91	2019	6	28	7	56	28	710	7.5	Moving/feeding/foraging	No reaction
ADK21	89	160200	ADK_cam18_103_712011_667032_20190330	6280729	2019-03-30	2019-06-28	91	2019	6	28	7	56	31	711	7.5	Moving/feeding/foraging	No reaction
ADK21	89	160200	ADK_cam18_103_712011_667032_20190330	6280729	2019-03-30	2019-06-28	91	2019	6	28	7	56	33	711	7.5	Moving/feeding/foraging	No reaction
ADK21	89	160200	ADK_cam18_103_712011_667032_20190330	6280729	2019-03-30	2019-06-28	91	2019	6	28	7	56	35	711	7.5	Moving/feeding/foraging	No reaction
ADK21	89	160200	ADK_cam18_103_712011_667032_20190330	6280729	2019-03-30	2019-06-28	91	2019	6	28	7	56	31	712	1.5	Moving/feeding/foraging	No reaction
ADK21	89	160200	ADK_cam18_103_712011_667032_20190330	6280729	2019-03-30	2019-06-28	91	2019	6	28	7	56	33	712	1.5	Moving/feeding/foraging	No reaction
ADK21	89	160200	ADK_cam18_103_712011_667032_20190330	6280729	2019-03-30	2019-06-28	91	2019	6	28	7	56	35	712	1.5	Moving/feeding/foraging	No reaction
ADK21	89	160200	ADK_cam18_103_712011_667032_20190330	6280730	2019-03-30	2019-06-28	91	2019	6	28	7	56	45	713	7.5	Moving/feeding/foraging	No reaction
ADK21	89	160200	ADK_cam18_103_712011_667032_20190330	6280730	2019-03-30	2019-06-28	91	2019	6	28	7	56	47	713	7.5	Moving/feeding/foraging	No reaction
ADK21	89	160200	ADK_cam18_103_712011_667032_20190330	6280730	2019-03-30	2019-06-28	91	2019	6	28	7	56	49	713	7.5	Moving/feeding/foraging	No reaction
ADK21	89	160200	ADK_cam18_103_712011_667032_20190330	6280731	2019-03-30	2019-06-28	91	2019	6	28	7	57	47	714	6.5	Moving/feeding/foraging	No reaction
ADK21	89	160200	ADK_cam18_103_712011_667032_20190330	6280731	2019-03-30	2019-06-28	91	2019	6	28	7	57	49	714	6.5	Moving/feeding/foraging	No reaction
ADK21	89	160200	ADK_cam18_103_712011_667032_20190330	6280731	2019-03-30	2019-06-28	91	2019	6	28	7	57	51	714	6.5	Moving/feeding/foraging	No reaction
ADK21	89	160200	ADK_cam18_103_712011_667032_20190330	6280731	2019-03-30	2019-06-28	91	2019	6	28	7	57	47	715	3.5	Moving/feeding/foraging	No reaction
ADK21	89	160200	ADK_cam18_103_712011_667032_20190330	6280731	2019-03-30	2019-06-28	91	2019	6	28	7	57	49	715	3.5	Moving/feeding/foraging	No reaction
ADK21	89	160200	ADK_cam18_103_712011_667032_20190330	6280731	2019-03-30	2019-06-28	91	2019	6	28	7	57	51	715	3.5	Moving/feeding/foraging	No reaction
ADK21	89	160200	ADK_cam18_103_712011_667032_20190330	6280732	2019-03-30	2019-06-28	91	2019	6	28	7	57	56	716	3.5	Moving/feeding/foraging	No reaction
ADK21	89	160200	ADK_cam18_103_712011_667032_20190330	6280732	2019-03-30	2019-06-28	91	2019	6	28	7	57	58	716	3.5	Moving/feeding/foraging	No reaction
ADK21	89	160200	ADK_cam18_103_712011_667032_20190330	6280732	2019-03-30	2019-06-28	91	2019	6	28	7	58	0	716	3.5	Moving/feeding/foraging	No reaction
ADK21	89	160200	ADK_cam18_103_712011_667032_20190330	6280732	2019-03-30	2019-06-28	91	2019	6	28	7	57	56	717	5.5	Moving/feeding/foraging	No reaction
ADK21	89	160200	ADK_cam18_103_712011_667032_20190330	6280732	2019-03-30	2019-06-28	91	2019	6	28	7	57	58	717	5.5	Moving/feeding/foraging	No reaction
ADK21	89	160200	ADK_cam18_103_712011_667032_20190330	6280732	2019-03-30	2019-06-28	91	2019	6	28	7	58	0	717	5.5	Moving/feeding/foraging	No reaction
ADK21	89	160200	ADK_cam18_103_712011_667032_20190330	6280733	2019-03-30	2019-06-28	91	2019	6	28	7	59	8	718	4.5	Moving/feeding/foraging	No reaction
ADK21	89	160200	ADK_cam18_103_712011_667032_20190330	6280733	2019-03-30	2019-06-28	91	2019	6	28	7	59	10	718	4.5	Moving/feeding/foraging	No reaction
ADK21	89	160200	ADK_cam18_103_712011_667032_20190330	6280733	2019-03-30	2019-06-28	91	2019	6	28	7	59	12	718	4.5	Moving/feeding/foraging	No reaction
ADK21	89	160200	ADK_cam18_103_712011_667032_20190330	6280734	2019-03-30	2019-06-28	91	2019	6	28	7	59	18	719	4.5	Moving/feeding/foraging	No reaction
ADK21	89	160200	ADK_cam18_103_712011_667032_20190330	6280734	2019-03-30	2019-06-28	91	2019	6	28	7	59	20	719	4.5	Moving/feeding/foraging	No reaction
ADK21	89	160200	ADK_cam18_103_712011_667032_20190330	6280734	2019-03-30	2019-06-28	91	2019	6	28	7	59	22	719	4.5	Moving/feeding/foraging	No reaction
ADK21	89	160200	ADK_cam18_103_712011_667032_20190330	6280735	2019-03-30	2019-06-28	91	2019	6	28	7	59	44	720	4.5	Moving/feeding/foraging	No reaction
ADK21	89	160200	ADK_cam18_103_712011_667032_20190330	6280735	2019-03-30	2019-06-28	91	2019	6	28	7	59	46	720	4.5	Moving/feeding/foraging	No reaction
ADK21	89	160200	ADK_cam18_103_712011_667032_20190330	6280735	2019-03-30	2019-06-28	91	2019	6	28	7	59	48	720	4.5	Moving/feeding/foraging	No reaction
ADK21	89	160200	ADK_cam18_103_712011_667032_20190330	6280736	2019-03-30	2019-06-28	91	2019	6	28	7	59	53	721	5.5	Moving/feeding/foraging	No reaction
ADK21	172	309600	ADK_cam18_103_712011_667032_20190330	6280736	2019-03-30	2019-06-28	91	2019	6	28	7	59	55	721	5.5	Moving/feeding/foraging	No reaction
ADK21	172	309600	ADK_cam18_103_712011_667032_20190330	6280736	2019-03-30	2019-06-28	91	2019	6	28	7	59	57	721	5.5	Moving/feeding/foraging	No reaction
ADK22	172	309600	ADK_cam18_83_717985_667016_20190401	6180414	2019-04-01	2019-06-18	79	2019	6	18	7	39	21	492	4.5	Moving/feeding/foraging	No reaction
ADK22	172	309600	ADK_cam_18_74_690998_700016_20200205	6180414	2019-04-01	2019-06-18	79	2019	6	18	7	39	23	492	4.5	Moving/feeding/foraging	No reaction
ADK22	172	309600	ADK_cam_18_74_690998_700016_20200205	6180414	2019-04-01	2019-06-18	79	2019	6	18	7	39	25	492	5.5	Moving/feeding/foraging	No reaction
ADK23	172	309600	ADK_cam_18_110_696999_670027_20190908	9240030	2019-09-08	2019-09-24	17	2019	9	24	7	40	37	407	3.5	Moving/feeding/foraging	No reaction
ADK23	172	309600	ADK_cam_18_110_696999_670027_20190908	9240030	2019-09-08	2019-09-24	17	2019	9	24	7	40	39	407	3.5	Moving/feeding/foraging	No reaction
ADK23	172	309600	ADK_cam_18_110_696999_670027_20190908	9240030	2019-09-08	2019-09-24	17	2019	9	24	7	40	41	407	3.5	Moving/feeding/foraging	No reaction
ADK23	172	309600	ADK_cam_18_110_696999_670027_20190908	9240030	2019-09-08	2019-09-24	17	2019	9	24	7	40	43	407	3.5	Moving/feeding/foraging	No reaction
ADK23	172	309600	ADK_cam_18_110_696999_670027_20190908	9240030	2019-09-08	2019-09-24	17	2019	9	24	7	40	45	407	3.5	Moving/feeding/foraging	No reaction
ADK23	172	309600	ADK_cam_18_110_696999_670027_20190908	9240030	2019-09-08	2019-09-24	17	2019	9	24	7	40	11	407	3.5	Moving/feeding/foraging	No reaction
ADK23	172	309600	ADK_cam_18_110_696999_670027_20190908	9240030	2019-09-08	2019-09-24	17	2019	9	24	7	40	13	407	2.5	Moving/feeding/foraging	No reaction
ADK23	172	309600	ADK_cam_18_110_696999_670027_20190908	9240030	2019-09-08	2019-09-24	17	2019	9	24	7	40	15	407	2.5	Moving/feeding/foraging	No reaction
ADK23	172	309600	ADK_cam_18_110_696999_670027_20190908	9240030	2019-09-08	2019-09-24	17	2019	9	24	7	40	17	407	2.5	Moving/feeding/foraging	No reaction
ADK23	172	309600	ADK_cam_18_110_696999_670027_20190908	9240030	2019-09-08	2019-09-24	17	2019	9	24	7	40	19	407	2.5	Moving/feeding/foraging	No reaction
ADK23	172	309600	ADK_cam_18_110_696999_670027_20190908	9240030	2019-09-08	2019-09-24	17	2019	9	24	7	40	21	407	2.5	Moving/feeding/foraging	No reaction
ADK23	172	309600	ADK_cam_18_110_696999_670027_20190908	9240030	2019-09-08	2019-09-24	17	2019	9	24	7	40	23	407	2.5	Moving/feeding/foraging	No reaction
ADK23	172	309600	ADK_cam_18_110_696999_670027_20190908	9240030	2019-09-08	2019-09-24	17	2019	9	24	7	40	25	407	2.5	Moving/feeding/foraging	No reaction
ADK23	172	309600	ADK_cam_18_110_696999_670027_20190908	9240030	2019-09-08	2019-09-24	17	2019	9	24	7	40	27	407	2.5	Moving/feeding/foraging	No reaction
ADK23	172	309600	ADK_cam_18_110_696999_670027_20190908	9240030	2019-09-08	2019-09-24	17	2019	9	24	7	40	29	407	2.5	Moving/feeding/foraging	No reaction
ADK23	172	309600	ADK_cam_18_110_696999_670027_20190908	9240030	2019-09-08	2019-09-24	17	2019	9	24	7	40	31	407	2.5	Moving/feeding/foraging	No reaction
ADK23	172	309600	ADK_cam_18_110_696999_670027_20190908	9240030	2019-09-08	2019-09-24	17	2019	9	24	7	40	33	407	2.5	Moving/feeding/foraging	No reaction
ADK23	172	309600	ADK_cam_18_110_696999_670027_20190908	9240030	2019-09-08	2019-09-24	17	2019	9	24	7	40	35	407	2.5	Moving/feeding/foraging	No reaction
ADK23	172	309600	ADK_cam_18_110_696999_670027_20190908	9240031	2019-09-08	2019-09-24	17	2019	9	24	7	41	40	408	2.5	Moving/feeding/foraging	No reaction
ADK23	172	309600	ADK_cam_18_110_696999_670027_20190908	9240031	2019-09-08	2019-09-24	17	2019	9	24	7	41	42	408	2.5	Moving/feeding/foraging	No reaction
ADK23	172	309600	ADK_cam_18_110_696999_670027_20190908	9240031	2019-09-08	2019-09-24	17	2019	9	24	7	41	44	408	2.5	Moving/feeding/foraging	No reaction
ADK23	172	309600	ADK_cam_18_110_696999_670027_20190908	9240031	2019-09-08	2019-09-24	17	2019	9	24	7	41	46	408	2.5	Moving/feeding/foraging	No reaction
ADK23	172	309600	ADK_cam_18_110_696999_670027_20190908	9240031	2019-09-08	2019-09-24	17	2019	9	24	7	41	48	408	2.5	Moving/feeding/foraging	No reaction
ADK23	172	309600	ADK_cam_18_110_696999_670027_20190908	9240031	2019-09-08	2019-09-24	17	2019	9	24	7	41	50	408	2.5	Moving/feeding/foraging	No reaction
ADK23	172	309600	ADK_cam_18_110_696999_670027_20190908	9240031	2019-09-08	2019-09-24	17	2019	9	24	7	41	52	408	2.5	Moving/feeding/foraging	No reaction
ADK23	172	309600	ADK_cam_18_110_696999_670027_20190908	9280037	2019-09-08	2019-09-28	21	2019	9	28	7	26	59	409	6.5	Moving/feeding/foraging	No reaction
ADK23	172	309600	ADK_cam_18_110_696999_670027_20190908	9280037	2019-09-08	2019-09-28	21	2019	9	28	7	27	1	409	5.5	Moving/feeding/foraging	No reaction
ADK23	172	309600	ADK_cam_18_110_696999_670027_20190908	9280037	2019-09-08	2019-09-28	21	2019	9	28	7	27	3	409	4.5	Moving/feeding/foraging	No reaction
ADK23	172	309600	ADK_cam_18_110_696999_670027_20190908	9280037	2019-09-08	2019-09-28	21	2019	9	28	7	27	5	409	3.5	Moving/feeding/foraging	No reaction
ADK23	172	309600	ADK_cam_18_110_696999_670027_20190908	9280037	2019-09-08	2019-09-28	21	2019	9	28	7	26	59	410	7.5	Moving/feeding/foraging	No reaction
ADK23	172	309600	ADK_cam_18_110_696999_670027_20190908	9280037	2019-09-08	2019-09-28	21	2019	9	28	7	27	1	410	6.5	Moving/feeding/foraging	No reaction
ADK23	172	309600	ADK_cam_18_110_696999_670027_20190908	9280037	2019-09-08	2019-09-28	21	2019	9	28	7	27	3	410	5.5	Moving/feeding/foraging	No reaction
ADK23	172	309600	ADK_cam_18_110_696999_670027_20190908	9280037	2019-09-08	2019-09-28	21	2019	9	28	7	27	5	410	4.5	Moving/feeding/foraging	No reaction
ADK23	172	309600	ADK_cam_18_110_696999_670027_20190908	9280037	2019-09-08	2019-09-28	21	2019	9	28	7	27	7	410	3.5	Moving/feeding/foraging	No reaction
ADK23	172	309600	ADK_cam_18_110_696999_670027_20190908	9280037	2019-09-08	2019-09-28	21	2019	9	28	7	27	54	411	6.5	Moving/feeding/foraging	No reaction
ADK23	174	313200	ADK_cam_18_110_696999_670027_20190908	9280037	2019-09-08	2019-09-28	21	2019	9	28	7	27	56	412	6.5	Moving/feeding/foraging	No reaction
ADK23	174	313200	ADK_cam_18_110_696999_670027_20190908	9280037	2019-09-08	2019-09-28	21	2019	9	28	7	27	58	413	7.5	Moving/feeding/foraging	No reaction
ADK23	174	313200	ADK_cam_18_110_696999_670027_20190908	11140194	2019-09-08	2019-11-14	68	2019	11	14	7	54	6	414	9	Moving/feeding/foraging	No reaction
ADK23	88	158400	ADK_cam_18_110_696999_670027_20190908	11140194	2019-09-08	2019-11-14	68	2019	11	14	7	54	8	414	9	Moving/feeding/foraging	No reaction
ADK23	88	158400	ADK_cam_18_110_696999_670027_20190908	11140194	2019-09-08	2019-11-14	68	2019	11	14	7	54	10	414	9	Moving/feeding/foraging	No reaction
ADK24	88	158400	ADK_cam_18_61_703014_670002_20190905	12310245	2019-09-05	2019-12-31	118	2019	12	31	7	16	50	415	3.5	Moving/feeding/foraging	No reaction
ADK24	88	158400	ADK_cam_18_61_703014_670002_20190905	12310245	2019-09-05	2019-12-31	118	2019	12	31	7	16	52	415	3.5	Moving/feeding/foraging	No reaction
ADK24	88	158400	ADK_cam_18_61_703014_670002_20190905	12310245	2019-09-05	2019-12-31	118	2019	12	31	7	16	54	415	3.5	Moving/feeding/foraging	No reaction
ADK25	88	158400	NA	NA	2019-03-30	#VALUE!	#VALUE!	NA	NA	NA	NA	NA	NA	NA
ADK26	88	158400	ADK_cam18_105_715001_669999_20190329	4280049	2019-03-29	2019-04-28	31	2019	4	28	7	50	12	493	6.5	Moving/feeding/foraging	No reaction
ADK26	88	158400	ADK_cam18_105_715001_669999_20190329	4280049	2019-03-29	2019-04-28	31	2019	4	28	7	50	14	493	6.5	Moving/feeding/foraging	No reaction
ADK26	88	158400	ADK_cam18_105_715001_669999_20190329	4280049	2019-03-29	2019-04-28	31	2019	4	28	7	50	16	493	6.5	Moving/feeding/foraging	No reaction
ADK26	88	158400	ADK_cam18_105_715001_669999_20190329	4280049	2019-03-29	2019-04-28	31	2019	4	28	7	50	18	493	5.5	Moving/feeding/foraging	No reaction
ADK26	88	158400	ADK_cam18_105_715001_669999_20190329	4280049	2019-03-29	2019-04-28	31	2019	4	28	7	50	20	493	5.5	Moving/feeding/foraging	No reaction
ADK26	88	158400	ADK_cam18_105_715001_669999_20190329	4280049	2019-03-29	2019-04-28	31	2019	4	28	7	50	22	493	4.5	Moving/feeding/foraging	No reaction
ADK26	88	158400	ADK_cam18_105_715001_669999_20190329	4280049	2019-03-29	2019-04-28	31	2019	4	28	7	50	24	493	3.5	Moving/feeding/foraging	No reaction
ADK26	88	158400	ADK_cam18_105_715001_669999_20190329	4280049	2019-03-29	2019-04-28	31	2019	4	28	7	50	26	493	3.5	Moving/feeding/foraging	No reaction
ADK26	88	158400	ADK_cam18_105_715001_669999_20190329	4280049	2019-03-29	2019-04-28	31	2019	4	28	7	50	28	493	3.5	Moving/feeding/foraging	No reaction
ADK26	88	158400	ADK_cam18_105_715001_669999_20190329	4280049	2019-03-29	2019-04-28	31	2019	4	28	7	50	30	493	3.5	Moving/feeding/foraging	No reaction
ADK26	88	158400	ADK_cam18_105_715001_669999_20190329	4280049	2019-03-29	2019-04-28	31	2019	4	28	7	50	32	493	3.5	Moving/feeding/foraging	No reaction
ADK26	88	158400	ADK_cam18_105_715001_669999_20190329	4280049	2019-03-29	2019-04-28	31	2019	4	28	7	50	34	493	3.5	Moving/feeding/foraging	No reaction
ADK26	88	158400	ADK_cam18_105_715001_669999_20190329	4280049	2019-03-29	2019-04-28	31	2019	4	28	7	50	36	493	3.5	Moving/feeding/foraging	No reaction
ADK26	88	158400	ADK_cam18_105_715001_669999_20190329	4280049	2019-03-29	2019-04-28	31	2019	4	28	7	50	38	493	3.5	Moving/feeding/foraging	No reaction
ADK26	88	158400	ADK_cam18_105_715001_669999_20190329	4280049	2019-03-29	2019-04-28	31	2019	4	28	7	50	40	493	3.5	Moving/feeding/foraging	No reaction
ADK26	88	158400	ADK_cam18_105_715001_669999_20190329	4280049	2019-03-29	2019-04-28	31	2019	4	28	7	50	42	493	3.5	Moving/feeding/foraging	No reaction
ADK26	88	158400	ADK_cam18_105_715001_669999_20190329	4280049	2019-03-29	2019-04-28	31	2019	4	28	7	50	44	493	3.5	Moving/feeding/foraging	No reaction
ADK26	88	158400	ADK_cam18_105_715001_669999_20190329	4280049	2019-03-29	2019-04-28	31	2019	4	28	7	50	46	493	3.5	Moving/feeding/foraging	No reaction
ADK26	88	158400	ADK_cam18_105_715001_669999_20190329	4280049	2019-03-29	2019-04-28	31	2019	4	28	7	50	48	493	3.5	Moving/feeding/foraging	No reaction
ADK26	48	86400	ADK_cam18_105_715001_669999_20190329	4280049	2019-03-29	2019-04-28	31	2019	4	28	7	50	50	493	3.5	Moving/feeding/foraging	No reaction
ADK26	48	86400	ADK_cam18_105_715001_669999_20190329	4280049	2019-03-29	2019-04-28	31	2019	4	28	7	50	52	493	3.5	Moving/feeding/foraging	No reaction
ADK26	48	86400	ADK_cam18_105_715001_669999_20190329	4280049	2019-03-29	2019-04-28	31	2019	4	28	7	50	54	493	3.5	Moving/feeding/foraging	No reaction
ADK26	48	86400	ADK_cam18_105_715001_669999_20190329	4280049	2019-03-29	2019-04-28	31	2019	4	28	7	50	56	493	3.5	Moving/feeding/foraging	No reaction
ADK26	48	86400	ADK_cam18_105_715001_669999_20190329	4280049	2019-03-29	2019-04-28	31	2019	4	28	7	50	58	493	3.5	Moving/feeding/foraging	No reaction
ADK26	48	86400	ADK_cam18_105_715001_669999_20190329	4280049	2019-03-29	2019-04-28	31	2019	4	28	7	51	0	493	3.5	Moving/feeding/foraging	No reaction
ADK27	48	86400	ADK_cam18_70_693980_672992_20190529	6280053	2019-05-29	2019-06-28	31	2019	6	28	7	43	3	494	1.5	Moving/feeding/foraging	No reaction
ADK27	48	86400	ADK_cam18_70_693980_672992_20190529	6280053	2019-05-29	2019-06-28	31	2019	6	28	7	43	5	494	2.5	Moving/feeding/foraging	No reaction
ADK27	48	86400	ADK_cam18_70_693980_672992_20190529	6280053	2019-05-29	2019-06-28	31	2019	6	28	7	43	7	494	2.5	Moving/feeding/foraging	No reaction
ADK27	48	86400	ADK_cam18_70_693980_672992_20190529	6280053	2019-05-29	2019-06-28	31	2019	6	28	7	43	9	494	2.5	Moving/feeding/foraging	No reaction
ADK27	48	86400	ADK_cam18_70_693980_672992_20190529	6280053	2019-05-29	2019-06-28	31	2019	6	28	7	43	11	494	2.5	Moving/feeding/foraging	No reaction
ADK27	48	86400	ADK_cam18_70_693980_672992_20190529	6280053	2019-05-29	2019-06-28	31	2019	6	28	7	43	13	494	2.5	Moving/feeding/foraging	No reaction
ADK27	48	86400	ADK_cam18_70_693980_672992_20190529	6280053	2019-05-29	2019-06-28	31	2019	6	28	7	43	15	494	2.5	Moving/feeding/foraging	No reaction
ADK27	48	86400	ADK_cam18_70_693980_672992_20190529	6280053	2019-05-29	2019-06-28	31	2019	6	28	7	43	17	494	2.5	Moving/feeding/foraging	No reaction
ADK27	48	86400	ADK_cam18_70_693980_672992_20190529	6280053	2019-05-29	2019-06-28	31	2019	6	28	7	43	19	494	3.5	Moving/feeding/foraging	No reaction
ADK27	48	86400	ADK_cam18_70_693980_672992_20190529	6280053	2019-05-29	2019-06-28	31	2019	6	28	7	43	21	494	3.5	Moving/feeding/foraging	No reaction
ADK27	48	86400	ADK_cam18_70_693980_672992_20190529	6280053	2019-05-29	2019-06-28	31	2019	6	28	7	43	23	494	3.5	Moving/feeding/foraging	No reaction
ADK27	48	86400	ADK_cam18_70_693980_672992_20190529	6280053	2019-05-29	2019-06-28	31	2019	6	28	7	43	25	494	3.5	Moving/feeding/foraging	No reaction
ADK27	48	86400	ADK_cam18_70_693980_672992_20190529	6280053	2019-05-29	2019-06-28	31	2019	6	28	7	43	27	494	3.5	Moving/feeding/foraging	No reaction
ADK27	48	86400	ADK_cam18_70_693980_672992_20190529	6280053	2019-05-29	2019-06-28	31	2019	6	28	7	43	29	494	3.5	Moving/feeding/foraging	No reaction
ADK27	48	86400	ADK_cam18_70_693980_672992_20190529	6280053	2019-05-29	2019-06-28	31	2019	6	28	7	43	31	494	3.5	Moving/feeding/foraging	No reaction
ADK27	48	86400	ADK_cam18_70_693980_672992_20190529	6280053	2019-05-29	2019-06-28	31	2019	6	28	7	43	33	494	3.5	Moving/feeding/foraging	No reaction
ADK27	48	86400	ADK_cam18_70_693980_672992_20190529	6280053	2019-05-29	2019-06-28	31	2019	6	28	7	43	35	494	4.5	Moving/feeding/foraging	No reaction
ADK27	48	86400	ADK_cam18_70_693980_672992_20190529	6280053	2019-05-29	2019-06-28	31	2019	6	28	7	43	37	494	4.5	Moving/feeding/foraging	No reaction
ADK27	48	86400	ADK_cam18_70_693980_672992_20190529	6280053	2019-05-29	2019-06-28	31	2019	6	28	7	43	39	494	4.5	Moving/feeding/foraging	No reaction
ADK27	48	86400	ADK_cam18_70_693980_672992_20190529	6280053	2019-05-29	2019-06-28	31	2019	6	28	7	43	41	494	4.5	Moving/feeding/foraging	No reaction
ADK27	48	86400	ADK_cam18_70_693980_672992_20190529	6280053	2019-05-29	2019-06-28	31	2019	6	28	7	43	43	494	4.5	Moving/feeding/foraging	No reaction
ADK27	48	86400	ADK_cam18_70_693980_672992_20190529	6280053	2019-05-29	2019-06-28	31	2019	6	28	7	43	45	494	5.5	Moving/feeding/foraging	No reaction
ADK27	48	86400	ADK_cam18_70_693980_672992_20190529	6280053	2019-05-29	2019-06-28	31	2019	6	28	7	43	47	494	5.5	Moving/feeding/foraging	No reaction
ADK27	48	86400	ADK_cam18_70_693980_672992_20190529	6280053	2019-05-29	2019-06-28	31	2019	6	28	7	43	49	494	5.5	Moving/feeding/foraging	No reaction
ADK27	48	86400	ADK_cam18_70_693980_672992_20190529	6280053	2019-05-29	2019-06-28	31	2019	6	28	7	43	51	494	5.5	Moving/feeding/foraging	No reaction
ADK27	48	86400	ADK_cam18_70_693980_672992_20190529	6280053	2019-05-29	2019-06-28	31	2019	6	28	7	43	53	494	5.5	Moving/feeding/foraging	No reaction
ADK27	48	86400	ADK_cam18_70_693980_672992_20190529	6280053	2019-05-29	2019-06-28	31	2019	6	28	7	43	55	494	6.5	Moving/feeding/foraging	No reaction
ADK27	48	86400	ADK_cam18_70_693980_672992_20190529	6280053	2019-05-29	2019-06-28	31	2019	6	28	7	43	57	494	6.5	Moving/feeding/foraging	No reaction
ADK27	48	86400	ADK_cam18_70_693980_672992_20190529	6280053	2019-05-29	2019-06-28	31	2019	6	28	7	43	59	494	7.5	Moving/feeding/foraging	No reaction
ADK27	48	86400	ADK_cam18_70_693980_672992_20190529	6280053	2019-05-29	2019-06-28	31	2019	6	28	7	44	1	494	7.5	Moving/feeding/foraging	No reaction
ADK27	48	86400	ADK_cam18_70_693980_672992_20190529	7060094	2019-05-29	2019-07-06	39	2019	7	6	7	43	43	495	7.5	Moving/feeding/foraging	No reaction
ADK27	48	86400	ADK_cam18_70_693980_672992_20190529	7060094	2019-05-29	2019-07-06	39	2019	7	6	7	43	45	495	7.5	Moving/feeding/foraging	No reaction
ADK27	48	86400	ADK_cam18_70_693980_672992_20190529	7060094	2019-05-29	2019-07-06	39	2019	7	6	7	43	47	495	7.5	Moving/feeding/foraging	No reaction
ADK27	48	86400	ADK_cam18_70_693980_672992_20190529	7060094	2019-05-29	2019-07-06	39	2019	7	6	7	43	49	495	7.5	Moving/feeding/foraging	No reaction
ADK27	48	86400	ADK_cam18_70_693980_672992_20190529	7060094	2019-05-29	2019-07-06	39	2019	7	6	7	43	51	495	7.5	Moving/feeding/foraging	No reaction
ADK27	48	86400	ADK_cam18_70_693980_672992_20190529	7060094	2019-05-29	2019-07-06	39	2019	7	6	7	43	53	495	7.5	Moving/feeding/foraging	No reaction
ADK27	48	86400	ADK_cam18_70_693980_672992_20190529	7060094	2019-05-29	2019-07-06	39	2019	7	6	7	43	55	495	7.5	Moving/feeding/foraging	No reaction
ADK27	48	86400	ADK_cam18_70_693980_672992_20190529	7060094	2019-05-29	2019-07-06	39	2019	7	6	7	43	57	495	7.5	Moving/feeding/foraging	No reaction
ADK27	48	86400	ADK_cam18_70_693980_672992_20190529	7060094	2019-05-29	2019-07-06	39	2019	7	6	7	43	59	495	7.5	Moving/feeding/foraging	No reaction
ADK27	48	86400	ADK_cam18_70_693980_672992_20190529	7060094	2019-05-29	2019-07-06	39	2019	7	6	7	44	1	495	7.5	Moving/feeding/foraging	No reaction
ADK27	48	86400	ADK_cam18_70_693980_672992_20190529	7060094	2019-05-29	2019-07-06	39	2019	7	6	7	44	3	495	6.5	Moving/feeding/foraging	No reaction
ADK27	48	86400	ADK_cam18_70_693980_672992_20190529	7060094	2019-05-29	2019-07-06	39	2019	7	6	7	44	5	495	6.5	Moving/feeding/foraging	No reaction
ADK27	170	306000	ADK_cam18_70_693980_672992_20190529	7060094	2019-05-29	2019-07-06	39	2019	7	6	7	44	7	495	6.5	Moving/feeding/foraging	No reaction
ADK27	170	306000	ADK_cam18_70_693980_672992_20190529	7060094	2019-05-29	2019-07-06	39	2019	7	6	7	44	9	495	6.5	Moving/feeding/foraging	No reaction
ADK27	170	306000	ADK_cam18_70_693980_672992_20190529	7060094	2019-05-29	2019-07-06	39	2019	7	6	7	44	11	495	6.5	Moving/feeding/foraging	No reaction
ADK27	170	306000	ADK_cam18_70_693980_672992_20190529	7060095	2019-05-29	2019-07-06	39	2019	7	6	7	44	24	496	6.5	Moving/feeding/foraging	No reaction
ADK27	170	306000	ADK_cam18_70_693980_672992_20190529	7060095	2019-05-29	2019-07-06	39	2019	7	6	7	44	26	496	6.5	Moving/feeding/foraging	No reaction
ADK27	170	306000	ADK_cam18_70_693980_672992_20190529	7160137	2019-05-29	2019-07-16	49	2019	7	16	7	59	37	497	2.5	Moving/feeding/foraging	No reaction
ADK28	170	306000	ADK_cam_18_95_699983_672998_20190909	9110009	2019-09-09	2019-09-11	3	2019	9	11	7	37	2	416	6.5	Moving/feeding/foraging	No reaction
ADK28	170	306000	ADK_cam_18_95_699983_672998_20190909	9110009	2019-09-09	2019-09-11	3	2019	9	11	7	37	4	416	6.5	Moving/feeding/foraging	No reaction
ADK28	170	306000	ADK_cam_18_95_699983_672998_20190909	9110009	2019-09-09	2019-09-11	3	2019	9	11	7	37	6	416	6.5	Moving/feeding/foraging	No reaction
ADK28	170	306000	ADK_cam_18_95_699983_672998_20190909	9110009	2019-09-09	2019-09-11	3	2019	9	11	7	37	8	416	6.5	Moving/feeding/foraging	No reaction
ADK28	170	306000	ADK_cam_18_95_699983_672998_20190909	9110009	2019-09-09	2019-09-11	3	2019	9	11	7	37	10	416	6.5	Moving/feeding/foraging	No reaction
ADK28	170	306000	ADK_cam_18_95_699983_672998_20190909	9110009	2019-09-09	2019-09-11	3	2019	9	11	7	37	12	416	6.5	Moving/feeding/foraging	No reaction
ADK28	170	306000	ADK_cam_18_95_699983_672998_20190909	9110009	2019-09-09	2019-09-11	3	2019	9	11	7	37	14	416	6.5	Moving/feeding/foraging	No reaction
ADK28	170	306000	ADK_cam_18_95_699983_672998_20190909	9110009	2019-09-09	2019-09-11	3	2019	9	11	7	37	16	416	6.5	Moving/feeding/foraging	No reaction
ADK28	170	306000	ADK_cam_18_95_699983_672998_20190909	10090107	2019-09-09	2019-10-09	31	2019	10	9	7	52	32	417	5.5	Moving/feeding/foraging	No reaction
ADK28	170	306000	ADK_cam_18_95_699983_672998_20190909	10090107	2019-09-09	2019-10-09	31	2019	10	9	7	52	34	417	5.5	Moving/feeding/foraging	No reaction
ADK28	170	306000	ADK_cam_18_95_699983_672998_20190909	10090107	2019-09-09	2019-10-09	31	2019	10	9	7	52	36	417	6.5	Moving/feeding/foraging	No reaction
ADK28	170	306000	ADK_cam_18_95_699983_672998_20190909	10090107	2019-09-09	2019-10-09	31	2019	10	9	7	52	38	417	7.5	Moving/feeding/foraging	No reaction
ADK28	170	306000	ADK_cam_18_95_699983_672998_20190909	10090107	2019-09-09	2019-10-09	31	2019	10	9	7	52	40	417	7.5	Moving/feeding/foraging	No reaction
ADK28	170	306000	ADK_cam_18_95_699983_672998_20190909	10090107	2019-09-09	2019-10-09	31	2019	10	9	7	52	42	417	7.5	Moving/feeding/foraging	No reaction
ADK28	170	306000	ADK_cam_18_95_699983_672998_20190909	10090107	2019-09-09	2019-10-09	31	2019	10	9	7	52	44	417	7.5	Moving/feeding/foraging	No reaction
ADK28	170	306000	ADK_cam_18_95_699983_672998_20190909	10150127	2019-09-09	2019-10-15	37	2019	10	15	7	47	28	418	4.5	Moving/feeding/foraging	No reaction
ADK28	170	306000	ADK_cam_18_95_699983_672998_20190909	10150127	2019-09-09	2019-10-15	37	2019	10	15	7	47	30	418	4.5	Moving/feeding/foraging	No reaction
ADK28	170	306000	ADK_cam_18_95_699983_672998_20190909	10240182	2019-09-09	2019-10-24	46	2019	10	24	7	40	57	419	2.5	Moving/feeding/foraging	No reaction
ADK28	170	306000	ADK_cam_18_95_699983_672998_20190909	10240182	2019-09-09	2019-10-24	46	2019	10	24	7	40	59	419	2.5	Moving/feeding/foraging	No reaction
ADK28	170	306000	ADK_cam_18_95_699983_672998_20190909	10240182	2019-09-09	2019-10-24	46	2019	10	24	7	41	1	419	2.5	Moving/feeding/foraging	No reaction
ADK28	170	306000	ADK_cam_18_95_699983_672998_20190909	10240182	2019-09-09	2019-10-24	46	2019	10	24	7	41	3	419	2.5	Moving/feeding/foraging	No reaction
ADK28	170	306000	ADK_cam_18_95_699983_672998_20190909	10240182	2019-09-09	2019-10-24	46	2019	10	24	7	41	5	419	2.5	Moving/feeding/foraging	No reaction
ADK28	170	306000	ADK_cam_18_95_699983_672998_20190909	10240184	2019-09-09	2019-10-24	46	2019	10	24	7	43	40	420	2.5	Moving/feeding/foraging	No reaction
ADK28	170	306000	ADK_cam_18_95_699983_672998_20190909	10240184	2019-09-09	2019-10-24	46	2019	10	24	7	43	42	420	2.5	Moving/feeding/foraging	No reaction
ADK28	170	306000	ADK_cam_18_95_699983_672998_20190909	10240184	2019-09-09	2019-10-24	46	2019	10	24	7	43	44	420	2.5	Moving/feeding/foraging	No reaction
ADK28	170	306000	ADK_cam_18_95_699983_672998_20190909	10240184	2019-09-09	2019-10-24	46	2019	10	24	7	43	46	420	2.5	Moving/feeding/foraging	No reaction
ADK28	170	306000	ADK_cam_18_95_699983_672998_20190909	11080266	2019-09-09	2019-11-08	61	2019	11	8	7	53	34	421	4.5	Moving/feeding/foraging	No reaction
ADK28	170	306000	ADK_cam_18_95_699983_672998_20190909	11080266	2019-09-09	2019-11-08	61	2019	11	8	7	53	36	421	4.5	Moving/feeding/foraging	No reaction
ADK28	170	306000	ADK_cam_18_95_699983_672998_20190909	11080266	2019-09-09	2019-11-08	61	2019	11	8	7	53	38	421	4.5	Moving/feeding/foraging	No reaction
ADK28	170	306000	ADK_cam_18_95_699983_672998_20190909	11080267	2019-09-09	2019-11-08	61	2019	11	8	7	53	57	422	5.5	Moving/feeding/foraging	No reaction
ADK28	170	306000	ADK_cam_18_95_699983_672998_20190909	11080267	2019-09-09	2019-11-08	61	2019	11	8	7	53	59	422	5.5	Moving/feeding/foraging	No reaction
ADK28	170	306000	ADK_cam_18_95_699983_672998_20190909	11080267	2019-09-09	2019-11-08	61	2019	11	8	7	54	1	422	6.5	Moving/feeding/foraging	No reaction
ADK28	170	306000	ADK_cam_18_95_699983_672998_20190909	11090278	2019-09-09	2019-11-09	62	2019	11	9	7	48	35	423	5.5	Moving/feeding/foraging	No reaction
[truncated: 11,290 more rows]

## Sheet: Jentink's_duiker
Transect_ID	TIME_IN_PLACE_(DAYS)	EFFort	FILE_NAME	Video_Name	Starting_date	Date_observation	Time_observation	Year	Month	Day	Hour	Minute	Second	Ind_No	Distance_(m)	Behaviour	Reactivity
ADK01	175	4095000	ADK_cam18-117_718009_654986_20190726	8230045	2019-07-26	2019-08-23	29	2019	8	23	23	10	58	246	6.5	Moving	No reaction
ADK01	175	4095000	ADK_cam18-117_718009_654986_20190726	8230045	2019-07-26	2019-08-23	29	2019	8	23	23	11	0	246	6.5	Moving	No reaction
ADK01	175	4095000	ADK_cam18-117_718009_654986_20190726	8230045	2019-07-26	2019-08-23	29	2019	8	23	23	11	2	246	6.5	Moving	No reaction
ADK01	175	4095000	ADK_cam18-117_718009_654986_20190726	8230045	2019-07-26	2019-08-23	29	2019	8	23	23	11	4	246	6.5	Moving	No reaction
ADK01	175	4095000	ADK_cam18-117_718009_654986_20190726	8230045	2019-07-26	2019-08-23	29	2019	8	23	23	11	6	246	6.5	Moving	No reaction
ADK01	175	4095000	ADK_cam18-117_718009_654986_20190726	8230045	2019-07-26	2019-08-23	29	2019	8	23	23	11	8	246	6.5	Moving	No reaction
ADK01	175	4095000	ADK_cam18-117_718009_654986_20190726	8230045	2019-07-26	2019-08-23	29	2019	8	23	23	11	10	246	6.5	Moving	No reaction
ADK01	175	4095000	ADK_cam18-117_718009_654986_20190726	8230045	2019-07-26	2019-08-23	29	2019	8	23	23	11	12	246	7.5	Moving	No reaction
ADK01	175	4095000	ADK_cam18-117_718009_654986_20190726	8230045	2019-07-26	2019-08-23	29	2019	8	23	23	11	14	246	7.5	Moving	No reaction
ADK01	175	4095000	ADK_cam18-117_718009_654986_20190726	8230045	2019-07-26	2019-08-23	29	2019	8	23	23	11	16	246	7.5	Moving	No reaction
ADK01	175	4095000	ADK_cam18-117_718009_654986_20190726	8230045	2019-07-26	2019-08-23	29	2019	8	23	23	11	18	246	7.5	Moving	No reaction
ADK01	175	4095000	ADK_cam18-117_718009_654986_20190726	8230045	2019-07-26	2019-08-23	29	2019	8	23	23	11	20	246	9	Moving	No reaction
ADK01	175	4095000	ADK_cam18-117_718009_654986_20190726	8230045	2019-07-26	2019-08-23	29	2019	8	23	23	11	22	246	9	Moving	No reaction
ADK01	175	4095000	ADK_cam18-117_718009_654986_20190726	8230045	2019-07-26	2019-08-23	29	2019	8	23	23	11	24	246	9	Moving	No reaction
ADK01	175	4095000	ADK_cam18-117_718009_654986_20190726	8230045	2019-07-26	2019-08-23	29	2019	8	23	23	11	26	246	9	Moving	No reaction
ADK01	175	4095000	ADK_cam18-117_718009_654986_20190726	8230045	2019-07-26	2019-08-23	29	2019	8	23	23	11	28	246	9	Moving	No reaction
ADK01	175	4095000	ADK_cam18-117_718009_654986_20190726	8230045	2019-07-26	2019-08-23	29	2019	8	23	23	11	30	246	9	Moving	No reaction
ADK01	175	4095000	ADK_cam18-117_718009_654986_20190726	8230045	2019-07-26	2019-08-23	29	2019	8	23	23	11	32	246	9	Moving	No reaction
ADK01	175	4095000	ADK_cam18-117_718009_654986_20190726	8230045	2019-07-26	2019-08-23	29	2019	8	23	23	11	34	246	9	Moving	No reaction
ADK01	175	4095000	ADK_cam18-117_718009_654986_20190726	8230045	2019-07-26	2019-08-23	29	2019	8	23	23	11	36	246	9	Moving	No reaction
ADK01	175	4095000	ADK_cam18-117_718009_654986_20190726	8230045	2019-07-26	2019-08-23	29	2019	8	23	23	11	38	246	9	Moving	No reaction
ADK01	175	4095000	ADK_cam18-117_718009_654986_20190726	8230045	2019-07-26	2019-08-23	29	2019	8	23	23	11	40	246	9	Moving	No reaction
ADK01	175	4095000	ADK_cam18-117_718009_654986_20190726	8230045	2019-07-26	2019-08-23	29	2019	8	23	23	11	42	246	9	Moving	No reaction
ADK01	175	4095000	ADK_cam18-117_718009_654986_20190726	8230045	2019-07-26	2019-08-23	29	2019	8	23	23	11	44	246	9	Moving	No reaction
ADK01	175	4095000	ADK_cam18-117_718009_654986_20190726	8230045	2019-07-26	2019-08-23	29	2019	8	23	23	11	46	246	9	Moving	No reaction
ADK01	175	4095000	ADK_cam18-117_718009_654986_20190726	8230045	2019-07-26	2019-08-23	29	2019	8	23	23	11	48	246	9	Moving	No reaction
ADK01	175	4095000	ADK_cam18-117_718009_654986_20190726	8230045	2019-07-26	2019-08-23	29	2019	8	23	23	11	50	246	9	Moving	No reaction
ADK01	175	4095000	ADK_cam18-117_718009_654986_20190726	8230045	2019-07-26	2019-08-23	29	2019	8	23	23	11	52	246	9	Moving	No reaction
ADK01	175	4095000	ADK_cam18-117_718009_654986_20190726	8230045	2019-07-26	2019-08-23	29	2019	8	23	23	11	54	246	9	Moving	No reaction
ADK01	175	4095000	ADK_cam18-117_718009_654986_20190726	8230045	2019-07-25	2019-08-23	30	2019	8	23	23	11	56	246	9	Moving	No reaction
ADK02	174	4071600	ADK_cam18-71_724015_654985_20190725	8150013	2019-07-25	2019-08-15	22	2019	8	15	22	9	51	247	2.5	Inspection	With reaction
ADK02	174	4071600	ADK_cam18-71_724015_654985_20190725	8150013	2019-07-25	2019-08-15	22	2019	8	15	22	9	53	247	2.5	Inspection	With reaction
ADK02	174	4071600	ADK_cam18-71_724015_654985_20190725	8150013	2019-07-25	2019-08-15	22	2019	8	15	22	9	55	247	1.5	Inspection	With reaction
ADK02	174	4071600	ADK_cam18-71_724015_654985_20190725	8150013	2019-07-25	2019-08-15	22	2019	8	15	22	9	57	247	1.5	Attraction	With reaction
ADK02	174	4071600	ADK_cam18-71_724015_654985_20190725	8150013	2019-07-25	2019-08-15	22	2019	8	15	22	9	59	247	1.5	Attraction	With reaction
ADK02	174	4071600	ADK_cam18-71_724015_654985_20190725	8150013	2019-07-25	2019-08-15	22	2019	8	15	22	10	1	247	2.5	Avoidance	With reaction
ADK02	174	4071600	ADK_cam18-71_724015_654985_20190725	8150013	2019-07-25	2019-08-15	22	2019	8	15	22	10	3	247	2.5	Avoidance	With reaction
ADK02	174	4071600	ADK_cam18-71_724015_654985_20190725	8150013	2019-07-25	2019-08-15	22	2019	8	15	22	10	5	247	2.5	Attraction	With reaction
ADK02	174	4071600	ADK_cam18-71_724015_654985_20190725	8150013	2019-07-25	2019-08-15	22	2019	8	15	22	10	7	247	1.5	Attraction	With reaction
ADK02	174	4071600	ADK_cam18-71_724015_654985_20190725	8150013	2019-07-25	2019-08-15	22	2019	8	15	22	10	9	247	1.5	Attraction	With reaction
ADK02	174	4071600	ADK_cam18-71_724015_654985_20190725	8150013	2019-07-25	2019-08-15	22	2019	8	15	22	10	11	247	1.5	Attraction	With reaction
ADK02	174	4071600	ADK_cam18-71_724015_654985_20190725	8150013	2019-07-25	2019-08-15	22	2019	8	15	22	10	13	247	1.5	Attraction	With reaction
ADK02	174	4071600	ADK_cam18-71_724015_654985_20190725	8150013	2019-07-25	2019-08-15	22	2019	8	15	22	10	15	247	1.5	Attraction	With reaction
ADK02	174	4071600	ADK_cam18-71_724015_654985_20190725	8150014	2019-07-25	2019-08-15	22	2019	8	15	22	30	24	248	5.5	Fixation	With reaction
ADK02	174	4071600	ADK_cam18-71_724015_654985_20190725	8150014	2019-07-25	2019-08-15	22	2019	8	15	22	30	26	248	5.5	Fixation	With reaction
ADK02	174	4071600	ADK_cam18-71_724015_654985_20190725	8150014	2019-07-25	2019-08-15	22	2019	8	15	22	30	28	248	4.5	Inspection	With reaction
ADK02	174	4071600	ADK_cam18-71_724015_654985_20190725	8150014	2019-07-25	2019-08-15	22	2019	8	15	22	30	30	248	4.5	Attraction	With reaction
ADK02	174	4071600	ADK_cam18-71_724015_654985_20190725	8150014	2019-07-25	2019-08-15	22	2019	8	15	22	30	32	248	4.5	Attraction	With reaction
ADK02	174	4071600	ADK_cam18-71_724015_654985_20190725	8150014	2019-07-25	2019-08-15	22	2019	8	15	22	30	34	248	3.5	Attraction	With reaction
ADK02	174	4071600	ADK_cam18-71_724015_654985_20190725	8150014	2019-07-25	2019-08-15	22	2019	8	15	22	30	36	248	2.5	Attraction	With reaction
ADK02	174	4071600	ADK_cam18-71_724015_654985_20190725	8150014	2019-07-25	2019-08-15	22	2019	8	15	22	30	38	248	2.5	Inspection	With reaction
ADK02	174	4071600	ADK_cam18-71_724015_654985_20190725	8150014	2019-07-25	2019-08-15	22	2019	8	15	22	30	40	248	1.5	Inspection	With reaction
ADK02	174	4071600	ADK_cam18-71_724015_654985_20190725	8150014	2019-07-25	2019-08-15	22	2019	8	15	22	30	42	248	1.5	Inspection	With reaction
ADK02	174	4071600	ADK_cam18-71_724015_654985_20190725	8150014	2019-07-25	2019-08-15	22	2019	8	15	22	30	44	248	1.5	Inspection	With reaction
ADK02	174	4071600	ADK_cam18-71_724015_654985_20190725	8150014	2019-07-25	2019-08-15	22	2019	8	15	22	30	48	248	0.5	Attraction	With reaction
ADK02	174	4071600	ADK_cam18-71_724015_654985_20190725	8150014	2019-07-25	2019-08-15	22	2019	8	15	22	30	50	248	0.5	Attraction	With reaction
ADK02	174	4071600	ADK_cam18-71_724015_654985_20190725	8150014	2019-07-25	2019-08-15	22	2019	8	15	22	30	52	248	0.5	Attraction	With reaction
ADK02	174	4071600	ADK_cam18-71_724015_654985_20190725	8150014	2019-07-25	2019-08-15	22	2019	8	15	22	30	54	248	0.5	Attraction	With reaction
ADK02	174	4071600	ADK_cam18-71_724015_654985_20190725	9090023	2019-07-25	2019-09-09	47	2019	9	9	19	53	30	249	9	Moving	No reaction
ADK02	174	4071600	ADK_cam18-71_724015_654985_20190725	9090023	2019-07-25	2019-09-09	47	2019	9	9	19	53	32	249	9	Moving	No reaction
ADK02	174	4071600	ADK_cam18-71_724015_654985_20190725	9090023	2019-07-25	2019-09-09	47	2019	9	9	19	53	34	249	9	Moving	No reaction
ADK02	174	4071600	ADK_cam18-71_724015_654985_20190725	9090023	2019-07-25	2019-09-09	47	2019	9	9	19	53	36	249	9	Moving	No reaction
ADK02	174	4071600	ADK_cam18-71_724015_654985_20190725	9100025	2019-07-25	2019-09-10	48	2019	9	10	4	59	58	250	0.5	Moving	No reaction
ADK02	174	4071600	ADK_cam18-71_724015_654985_20190725	9100025	2019-07-25	2019-09-10	48	2019	9	10	5	0	0	250	1.5	Moving	No reaction
ADK02	174	4071600	ADK_cam18-71_724015_654985_20190725	9100025	2019-07-25	2019-09-10	48	2019	9	10	5	0	2	250	3.5	Moving	No reaction
ADK02	174	4071600	ADK_cam18-71_724015_654985_20190725	9100025	2019-07-25	2019-09-10	48	2019	9	10	5	0	4	250	4.5	Moving	No reaction
ADK02	174	4071600	ADK_cam18-71_724015_654985_20190725	9100025	2019-07-25	2019-09-10	48	2019	9	10	5	0	6	250	5.5	Moving	No reaction
ADK02	174	4071600	ADK_cam18-71_724015_654985_20190725	9100025	2019-07-25	2019-09-10	48	2019	9	10	5	0	8	250	6.5	Moving	No reaction
ADK02	174	4071600	ADK_cam18-71_724015_654985_20190725	9100025	2019-07-25	2019-09-10	48	2019	9	10	5	0	10	250	7.5	Moving	No reaction
ADK02	174	4071600	ADK_cam18-71_724015_654985_20190725	9100025	2019-07-25	2019-09-10	48	2019	9	10	5	0	12	250	9	Moving	No reaction
ADK02	174	4071600	ADK_cam18-71_724015_654985_20190725	9100025	2019-07-25	2019-09-10	48	2019	9	10	5	0	14	250	9	Moving	No reaction
ADK02	174	4071600	ADK_cam18-71_724015_654985_20190725	9100025	2019-07-25	2019-09-10	48	2019	9	10	5	0	16	250	9	Moving	No reaction
ADK02	174	4071600	ADK_cam18-71_724015_654985_20190725	9210039	2019-07-25	2019-09-21	59	2019	9	21	20	8	22	251	9	Moving	No reaction
ADK02	174	4071600	ADK_cam18-71_724015_654985_20190725	9210039	2019-07-25	2019-09-21	59	2019	9	21	20	8	24	251	9	Moving	No reaction
ADK02	174	4071600	ADK_cam18-71_724015_654985_20190725	9210039	2019-07-25	2019-09-21	59	2019	9	21	20	8	26	251	9	Moving	No reaction
ADK02	174	4071600	ADK_cam18-71_724015_654985_20190725	9250045	2019-07-25	2019-09-25	63	2019	9	25	19	16	6	252	7.5	Moving	No reaction
ADK02	174	4071600	ADK_cam18-71_724015_654985_20190725	9250045	2019-07-25	2019-09-25	63	2019	9	25	19	16	8	252	6.5	Moving	No reaction
ADK02	174	4071600	ADK_cam18-71_724015_654985_20190725	9250045	2019-07-25	2019-09-25	63	2019	9	25	19	16	10	252	5.5	Inspection	With reaction
ADK02	174	4071600	ADK_cam18-71_724015_654985_20190725	9250045	2019-07-25	2019-09-25	63	2019	9	25	19	16	12	252	5.5	Moving	No reaction
ADK02	174	4071600	ADK_cam18-71_724015_654985_20190725	9250045	2019-07-25	2019-09-25	63	2019	9	25	19	16	14	252	5.5	Moving	No reaction
ADK02	174	4071600	ADK_cam18-71_724015_654985_20190725	9270046	2019-07-25	2019-09-27	65	2019	9	27	3	7	15	253	7.5	Moving	No reaction
ADK02	174	4071600	ADK_cam18-71_724015_654985_20190725	9270046	2019-07-25	2019-09-27	65	2019	9	27	3	7	17	253	7.5	Moving	No reaction
ADK02	174	4071600	ADK_cam18-71_724015_654985_20190725	9270046	2019-07-25	2019-09-27	65	2019	9	27	3	7	19	253	7.5	Moving	No reaction
ADK02	174	4071600	ADK_cam18-71_724015_654985_20190725	9270046	2019-07-25	2019-09-27	65	2019	9	27	3	7	21	253	7.5	Moving	No reaction
ADK02	174	4071600	ADK_cam18-71_724015_654985_20190725	10180072	2019-07-25	2019-10-18	86	2019	10	18	4	10	25	255	6.5	Moving	No reaction
ADK02	174	4071600	ADK_cam18-71_724015_654985_20190725	10180072	2019-07-25	2019-10-18	86	2019	10	18	4	10	27	255	6.5	Moving	No reaction
ADK02	174	4071600	ADK_cam18-71_724015_654985_20190725	10180072	2019-07-25	2019-10-18	86	2019	10	18	4	10	29	255	6.5	Moving	No reaction
ADK02	174	4071600	ADK_cam18-71_724015_654985_20190725	10180072	2019-07-25	2019-10-18	86	2019	10	18	4	10	31	255	6.5	Inspection	With reaction
ADK02	174	4071600	ADK_cam18-71_724015_654985_20190725	10180072	2019-07-25	2019-10-18	86	2019	10	18	4	10	33	255	6.5	Inspection	With reaction
ADK02	174	4071600	ADK_cam18-71_724015_654985_20190725	10180072	2019-07-25	2019-10-18	86	2019	10	18	4	10	35	255	6.5	Inspection	With reaction
ADK02	174	4071600	ADK_cam18-71_724015_654985_20190725	10180072	2019-07-25	2019-10-18	86	2019	10	18	4	10	37	255	7.5	Avoidance	With reaction
ADK02	174	4071600	ADK_cam18-71_724015_654985_20190725	10180072	2019-07-25	2019-10-18	86	2019	10	18	4	11	0	256	11	Moving	No reaction
ADK02	174	4071600	ADK_cam18-71_724015_654985_20190725	10180072	2019-07-25	2019-10-18	86	2019	10	18	4	11	2	256	11	Moving	No reaction
ADK02	174	4071600	ADK_cam18-71_724015_654985_20190725	10180072	2019-07-25	2019-10-18	86	2019	10	18	4	11	4	256	11	Moving	No reaction
ADK02	174	4071600	ADK_cam18-71_724015_654985_20190725	10180072	2019-07-25	2019-10-18	86	2019	10	18	4	11	6	256	11	Moving	No reaction
ADK02	174	4071600	ADK_cam18-71_724015_654985_20190725	10180072	2019-07-25	2019-10-18	86	2019	10	18	4	11	8	256	11	Moving	No reaction
ADK02	174	4071600	ADK_cam18-71_724015_654985_20190725	10180072	2019-07-25	2019-10-18	86	2019	10	18	4	11	10	256	11	Moving	No reaction
ADK02	174	4071600	ADK_cam18-71_724015_654985_20190725	10180073	2019-07-25	2019-10-18	86	2019	10	18	4	59	35	257	5.5	Moving	No reaction
ADK02	174	4071600	ADK_cam18-71_724015_654985_20190725	10180073	2019-07-25	2019-10-18	86	2019	10	18	4	59	37	257	6.5	Moving	No reaction
ADK02	174	4071600	ADK_cam18-71_724015_654985_20190725	10180073	2019-07-25	2019-10-18	86	2019	10	18	4	59	39	257	6.5	Moving	No reaction
ADK02	174	4071600	ADK_cam18-71_724015_654985_20190725	10180073	2019-07-25	2019-10-18	86	2019	10	18	4	59	41	257	6.5	Inspection	With reaction
ADK02	174	4071600	ADK_cam18-71_724015_654985_20190725	10180073	2019-07-25	2019-10-18	86	2019	10	18	4	59	43	257	6.5	Inspection	With reaction
ADK02	174	4071600	ADK_cam18-71_724015_654985_20190725	10180073	2019-07-25	2019-10-18	86	2019	10	18	4	59	45	257	6.5	Inspection	With reaction
ADK02	174	4071600	ADK_cam18-71_724015_654985_20190725	10180073	2019-07-25	2019-10-18	86	2019	10	18	4	59	47	257	6.5	Inspection	With reaction
ADK02	174	4071600	ADK_cam18-71_724015_654985_20190725	10180073	2019-07-25	2019-10-18	86	2019	10	18	4	59	49	257	6.5	Inspection	With reaction
ADK02	174	4071600	ADK_cam18-71_724015_654985_20190725	10180073	2019-07-25	2019-10-18	86	2019	10	18	4	59	51	257	6.5	Inspection	With reaction
ADK02	174	4071600	ADK_cam18-71_724015_654985_20190725	10180073	2019-07-25	2019-10-18	86	2019	10	18	4	59	53	257	6.5	Inspection	With reaction
ADK02	174	4071600	ADK_cam18-71_724015_654985_20190725	10180073	2019-07-25	2019-10-18	86	2019	10	18	4	59	55	257	6.5	Inspection	With reaction
ADK02	174	4071600	ADK_cam18-71_724015_654985_20190725	10180073	2019-07-25	2019-10-18	86	2019	10	18	4	59	57	257	6.5	Inspection	With reaction
ADK02	174	4071600	ADK_cam18-71_724015_654985_20190725	10180073	2019-07-25	2019-10-18	86	2019	10	18	4	59	59	257	7.5	Moving	No reaction
ADK02	174	4071600	ADK_cam18-71_724015_654985_20190725	10180073	2019-07-25	2019-10-18	86	2019	10	18	5	0	1	257	7.5	Moving	No reaction
ADK02	174	4071600	ADK_cam18-71_724015_654985_20190725	10180075	2019-07-25	2019-10-18	86	2019	10	18	19	22	47	258	7.5	Inspection	With reaction
ADK02	174	4071600	ADK_cam18-71_724015_654985_20190725	10180075	2019-07-25	2019-10-18	86	2019	10	18	19	22	49	258	7.5	Inspection	With reaction
ADK02	174	4071600	ADK_cam18-71_724015_654985_20190725	10180075	2019-07-25	2019-10-18	86	2019	10	18	19	22	51	258	7.5	Moving	No reaction
ADK02	174	4071600	ADK_cam18-71_724015_654985_20190725	10180075	2019-07-25	2019-10-18	86	2019	10	18	19	22	53	258	6.5	Moving	No reaction
ADK02	174	4071600	ADK_cam18-71_724015_654985_20190725	10180075	2019-07-25	2019-10-18	86	2019	10	18	19	22	55	258	6.5	Moving	No reaction
ADK02	174	4071600	ADK_cam18-71_724015_654985_20190725	10180075	2019-07-25	2019-10-18	86	2019	10	18	19	22	57	258	6.5	Moving	No reaction
ADK02	174	4071600	ADK_cam18-71_724015_654985_20190725	10240082	2019-07-25	2019-10-24	92	2019	10	24	5	25	3	259	4.5	Moving	No reaction
ADK02	174	4071600	ADK_cam18-71_724015_654985_20190725	10240082	2019-07-25	2019-10-24	92	2019	10	24	5	25	5	259	4.5	Moving	No reaction
ADK02	174	4071600	ADK_cam18-71_724015_654985_20190725	10240082	2019-07-25	2019-10-24	92	2019	10	24	5	25	7	259	4.5	Moving	No reaction
ADK02	174	4071600	ADK_cam18-71_724015_654985_20190725	10240082	2019-07-25	2019-10-24	92	2019	10	24	5	25	9	259	4.5	Moving	No reaction
ADK02	174	4071600	ADK_cam18-71_724015_654985_20190725	10240082	2019-07-25	2019-10-24	92	2019	10	24	5	25	11	259	4.5	Moving	No reaction
ADK02	174	4071600	ADK_cam18-71_724015_654985_20190725	10240082	2019-07-25	2019-10-24	92	2019	10	24	5	25	13	259	4.5	Inspection	With reaction
ADK02	174	4071600	ADK_cam18-71_724015_654985_20190725	10240082	2019-07-25	2019-10-24	92	2019	10	24	5	25	15	259	3.5	Inspection	With reaction
ADK02	174	4071600	ADK_cam18-71_724015_654985_20190725	10240082	2019-07-25	2019-10-24	92	2019	10	24	5	25	17	259	3.5	Inspection	With reaction
ADK02	174	4071600	ADK_cam18-71_724015_654985_20190725	10240082	2019-07-25	2019-10-24	92	2019	10	24	5	25	19	259	3.5	Inspection	With reaction
ADK02	174	4071600	ADK_cam18-71_724015_654985_20190725	10240082	2019-07-25	2019-10-24	92	2019	10	24	5	25	21	259	3.5	Inspection	With reaction
ADK02	174	4071600	ADK_cam18-71_724015_654985_20190725	10240082	2019-07-25	2019-10-24	92	2019	10	24	5	25	39	259	1.5	Attraction	With reaction
ADK02	174	4071600	ADK_cam18-71_724015_654985_20190725	10240082	2019-07-25	2019-10-24	92	2019	10	24	5	25	41	259	1.5	Attraction	With reaction
ADK02	174	4071600	ADK_cam18-71_724015_654985_20190725	10240082	2019-07-25	2019-10-24	92	2019	10	24	5	25	43	259	0.5	Attraction	With reaction
ADK02	174	4071600	ADK_cam18-71_724015_654985_20190725	10240082	2019-07-25	2019-10-24	92	2019	10	24	5	25	45	259	0.5	Attraction	With reaction
ADK02	174	4071600	ADK_cam18-71_724015_654985_20190725	10240082	2019-07-25	2019-10-24	92	2019	10	24	5	25	47	259	0.5	Attraction	With reaction
ADK02	174	4071600	ADK_cam18-71_724015_654985_20190725	10240082	2019-07-25	2019-10-24	92	2019	10	24	5	25	49	259	0.5	Attraction	With reaction
ADK02	174	4071600	ADK_cam18-71_724015_654985_20190725	10240082	2019-07-25	2019-10-24	92	2019	10	24	5	25	51	259	0.5	Attraction	With reaction
ADK02	174	4071600	ADK_cam18-71_724015_654985_20190725	10240082	2019-07-25	2019-10-24	92	2019	10	24	5	25	53	259	0.5	Attraction	With reaction
ADK02	174	4071600	ADK_cam18-71_724015_654985_20190725	10240082	2019-07-25	2019-10-24	92	2019	10	24	5	25	55	259	0.5	Attraction	With reaction
ADK02	174	4071600	ADK_cam18-71_724015_654985_20190725	10240082	2019-07-25	2019-10-24	92	2019	10	24	5	25	57	259	0.5	Attraction	With reaction
ADK02	174	4071600	ADK_cam18-71_724015_654985_20190725	10240083	2019-07-25	2019-10-24	92	2019	10	24	5	26	15	260	2.5	Moving	No reaction
ADK02	174	4071600	ADK_cam18-71_724015_654985_20190725	10240083	2019-07-25	2019-10-24	92	2019	10	24	5	26	17	260	2.5	Moving	No reaction
ADK02	174	4071600	ADK_cam18-71_724015_654985_20190725	10240083	2019-07-25	2019-10-24	92	2019	10	24	5	26	19	260	2.5	Moving	No reaction
ADK02	174	4071600	ADK_cam18-71_724015_654985_20190725	10240083	2019-07-25	2019-10-24	92	2019	10	24	5	26	21	260	3.5	Moving	No reaction
ADK02	174	4071600	ADK_cam18-71_724015_654985_20190725	10240083	2019-07-25	2019-10-24	92	2019	10	24	5	26	23	260	4.5	Moving	No reaction
ADK02	174	4071600	ADK_cam18-71_724015_654985_20190725	10240083	2019-07-25	2019-10-24	92	2019	10	24	5	26	25	260	5.5	Moving	No reaction
ADK02	174	4071600	ADK_cam18-71_724015_654985_20190725	10240083	2019-07-25	2019-10-24	92	2019	10	24	5	26	27	260	6.5	Moving	No reaction
ADK02	174	4071600	ADK_cam18-71_724015_654985_20190725	10240083	2019-07-25	2019-10-24	92	2019	10	24	5	26	29	260	7.5	Moving	No reaction
ADK02	174	4071600	ADK_cam18-71_724015_654985_20190725	10240083	2019-07-25	2019-10-24	92	2019	10	24	5	26	31	260	7.5	Moving	No reaction
ADK02	174	4071600	ADK_cam18-71_724015_654985_20190725	10240084	2019-07-25	2019-10-24	92	2019	10	24	5	26	34	261	9	Moving	No reaction
ADK02	174	4071600	ADK_cam18-71_724015_654985_20190725	11080121	2019-07-25	2019-11-08	107	2019	11	8	22	33	31	262	7.5	Moving	No reaction
ADK02	174	4071600	ADK_cam18-71_724015_654985_20190725	11080121	2019-07-25	2019-11-08	107	2019	11	8	22	33	33	262	6.5	Inspection	With reaction
ADK02	174	4071600	ADK_cam18-71_724015_654985_20190725	11080121	2019-07-25	2019-11-08	107	2019	11	8	22	33	35	262	6.5	Inspection	With reaction
ADK02	174	4071600	ADK_cam18-71_724015_654985_20190725	11080121	2019-07-25	2019-11-08	107	2019	11	8	22	33	37	262	6.5	Inspection	With reaction
ADK02	174	4071600	ADK_cam18-71_724015_654985_20190725	11080121	2019-07-25	2019-11-08	107	2019	11	8	22	33	39	262	5.5	Attraction	With reaction
ADK02	174	4071600	ADK_cam18-71_724015_654985_20190725	11080121	2019-07-25	2019-11-08	107	2019	11	8	22	33	41	262	4.5	Attraction	With reaction
ADK02	174	4071600	ADK_cam18-71_724015_654985_20190725	11080121	2019-07-25	2019-11-08	107	2019	11	8	22	33	43	262	3.5	Attraction	With reaction
ADK02	174	4071600	ADK_cam18-71_724015_654985_20190725	11080121	2019-07-25	2019-11-08	107	2019	11	8	22	33	45	262	1.5	Attraction	With reaction
ADK02	174	4071600	ADK_cam18-71_724015_654985_20190725	11080121	2019-07-25	2019-11-08	107	2019	11	8	22	33	47	262	1.5	Attraction	With reaction
ADK02	174	4071600	ADK_cam18-71_724015_654985_20190725	11080121	2019-07-25	2019-11-08	107	2019	11	8	22	33	49	262	1.5	Attraction	With reaction
ADK02	174	4071600	ADK_cam18-71_724015_654985_20190725	11130125	2019-07-25	2019-11-13	112	2019	11	13	4	16	4	263	6.5	Moving	No reaction
ADK02	174	4071600	ADK_cam18-71_724015_654985_20190725	11130125	2019-07-25	2019-11-13	112	2019	11	13	4	16	6	263	6.5	Moving	No reaction
ADK02	174	4071600	ADK_cam18-71_724015_654985_20190725	11130125	2019-07-25	2019-11-13	112	2019	11	13	4	16	8	263	7.5	Moving	No reaction
ADK02	174	4071600	ADK_cam18-71_724015_654985_20190725	11130125	2019-07-25	2019-11-13	112	2019	11	13	4	16	10	263	7.5	Moving	No reaction
ADK02	174	4071600	ADK_cam18-71_724015_654985_20190725	11130125	2019-07-25	2019-11-13	112	2019	11	13	4	16	12	263	7.5	Moving	No reaction
ADK02	174	4071600	ADK_cam18-71_724015_654985_20190725	12050174	2019-07-25	2019-12-05	134	2019	12	5	19	7	33	264	6.5	Moving	No reaction
ADK02	174	4071600	ADK_cam18-71_724015_654985_20190725	12050174	2019-07-25	2019-12-05	134	2019	12	5	19	7	35	264	6.5	Inspection	With reaction
ADK02	174	4071600	ADK_cam18-71_724015_654985_20190725	12050174	2019-07-25	2019-12-05	134	2019	12	5	19	7	37	264	6.5	Moving	No reaction
ADK02	174	4071600	ADK_cam18-71_724015_654985_20190725	12050174	2019-07-25	2019-12-05	134	2019	12	5	19	7	39	264	5.5	Moving	No reaction
ADK02	174	4071600	ADK_cam18-71_724015_654985_20190725	12150197	2019-07-25	2019-12-15	144	2019	12	15	5	41	8	267	5.5	Moving	No reaction
ADK02	174	4071600	ADK_cam18-71_724015_654985_20190725	12150197	2019-07-25	2019-12-15	144	2019	12	15	5	41	10	267	6.5	Inspection	With reaction
ADK02	174	4071600	ADK_cam18-71_724015_654985_20190725	12150197	2019-07-25	2019-12-15	144	2019	12	15	5	41	12	267	6.5	Inspection	With reaction
ADK02	174	4071600	ADK_cam18-71_724015_654985_20190725	12150197	2019-07-25	2019-12-15	144	2019	12	15	5	41	14	267	6.5	Inspection	With reaction
ADK02	174	4071600	ADK_cam18-71_724015_654985_20190725	12150197	2019-07-25	2019-12-15	144	2019	12	15	5	41	16	267	6.5	Inspection	With reaction
ADK02	174	4071600	ADK_cam18-71_724015_654985_20190725	12150198	2019-07-25	2019-12-15	144	2019	12	15	5	41	18	268	7.5	Moving	No reaction
ADK02	174	4071600	ADK_cam18-71_724015_654985_20190725	12160201	2019-07-25	2019-12-16	145	2019	12	16	22	16	16	269	7.5	Moving	No reaction
ADK02	174	4071600	ADK_cam18-71_724015_654985_20190725	12160201	2019-07-25	2019-12-16	145	2019	12	16	22	16	18	269	7.5	Moving	No reaction
ADK02	174	4071600	ADK_cam18-71_724015_654985_20190725	12160201	2019-07-25	2019-12-16	145	2019	12	16	22	16	20	269	7.5	Moving	No reaction
ADK02	174	4071600	ADK_cam18-71_724015_654985_20190725	12160201	2019-07-25	2019-12-16	145	2019	12	16	22	16	22	269	7.5	Moving	No reaction
ADK02	174	4071600	ADK_cam18-71_724015_654985_20190725	12170202	2019-07-25	2019-12-17	146	2019	12	17	4	56	14	270	5.5	Moving	No reaction
ADK02	174	4071600	ADK_cam18-71_724015_654985_20190725	12170202	2019-07-25	2019-12-17	146	2019	12	17	4	56	16	270	6.5	Moving	No reaction
ADK02	174	4071600	ADK_cam18-71_724015_654985_20190725	12170202	2019-07-25	2019-12-17	146	2019	12	17	4	56	18	270	6.5	Inspection	With reaction
ADK02	174	4071600	ADK_cam18-71_724015_654985_20190725	12170202	2019-07-25	2019-12-17	146	2019	12	17	4	56	20	270	6.5	Inspection	With reaction
ADK02	174	4071600	ADK_cam18-71_724015_654985_20190725	12170202	2019-07-25	2019-12-17	146	2019	12	17	4	56	22	270	7.5	Inspection	With reaction
ADK02	174	4071600	ADK_cam18-71_724015_654985_20190725	12170203	2019-07-25	2019-12-17	146	2019	12	17	4	56	25	271	9	Moving	No reaction
ADK02	174	4071600	ADK_cam18-71_724015_654985_20190725	12190217	2019-07-25	2019-12-19	148	2019	12	19	5	22	42	272	7.5	Moving	No reaction
ADK02	174	4071600	ADK_cam18-71_724015_654985_20190725	12190217	2019-07-25	2019-12-19	148	2019	12	19	5	22	44	272	6.5	Moving	No reaction
ADK02	174	4071600	ADK_cam18-71_724015_654985_20190725	12190217	2019-07-25	2019-12-19	148	2019	12	19	5	22	46	272	5.5	Moving	No reaction
ADK02	174	4071600	ADK_cam18-71_724015_654985_20190725	12220243	2019-07-25	2019-12-22	151	2019	12	22	4	28	25	273	6.5	Inspection	With reaction
ADK02	174	4071600	ADK_cam18-71_724015_654985_20190725	12220243	2019-07-25	2019-12-22	151	2019	12	22	4	28	27	273	6.5	Inspection	With reaction
ADK02	174	4071600	ADK_cam18-71_724015_654985_20190725	12220243	2019-07-25	2019-12-22	151	2019	12	22	4	28	29	273	6.5	Inspection	With reaction
ADK02	174	4071600	ADK_cam18-71_724015_654985_20190725	12220244	2019-07-24	2019-12-22	152	2019	12	22	4	28	33	274	5.5	Moving	No reaction
ADK03	174	4071600	ADK_cam18_107_729966_654991_20190724	9080054	2019-07-24	2019-09-08	47	2019	9	8	21	48	54	275	0.5	Attraction	With reaction
ADK03	174	4071600	ADK_cam18_107_729966_654991_20190724	9080054	2019-07-24	2019-09-08	47	2019	9	8	21	48	56	275	0.5	Attraction	With reaction
ADK03	174	4071600	ADK_cam18_107_729966_654991_20190724	9080054	2019-07-24	2019-09-08	47	2019	9	8	21	48	58	275	0.5	Attraction	With reaction
ADK03	174	4071600	ADK_cam18_107_729966_654991_20190724	9080054	2019-07-24	2019-09-08	47	2019	9	8	21	49	0	275	0.5	Attraction	With reaction
ADK03	174	4071600	ADK_cam18_107_729966_654991_20190724	9080054	2019-07-24	2019-09-08	47	2019	9	8	21	49	2	275	0.5	Attraction	With reaction
ADK03	174	4071600	ADK_cam18_107_729966_654991_20190724	9080054	2019-07-24	2019-09-08	47	2019	9	8	21	49	4	275	0.5	Attraction	With reaction
ADK03	174	4071600	ADK_cam18_107_729966_654991_20190724	9080054	2019-07-24	2019-09-08	47	2019	9	8	21	49	6	275	0.5	Attraction	With reaction
ADK03	174	4071600	ADK_cam18_107_729966_654991_20190724	9080054	2019-07-24	2019-09-08	47	2019	9	8	21	49	8	275	0.5	Attraction	With reaction
ADK03	174	4071600	ADK_cam18_107_729966_654991_20190724	9080054	2019-07-24	2019-09-08	47	2019	9	8	21	49	10	275	0.5	Attraction	With reaction
ADK03	174	4071600	ADK_cam18_107_729966_654991_20190724	9080054	2019-07-24	2019-09-08	47	2019	9	8	21	49	12	275	0.5	Attraction	With reaction
ADK03	174	4071600	ADK_cam18_107_729966_654991_20190724	9080054	2019-07-24	2019-09-08	47	2019	9	8	21	49	14	275	0.5	Attraction	With reaction
ADK03	174	4071600	ADK_cam18_107_729966_654991_20190724	9080054	2019-07-24	2019-09-08	47	2019	9	8	21	49	16	275	0.5	Attraction	With reaction
ADK03	174	4071600	ADK_cam18_107_729966_654991_20190724	9080054	2019-07-24	2019-09-08	47	2019	9	8	21	49	18	275	0.5	Attraction	With reaction
ADK03	174	4071600	ADK_cam18_107_729966_654991_20190724	9080054	2019-12-01	2019-09-08	-83	2019	9	8	21	49	20	275	0.5	Attraction	With reaction
ADK04	93	2176200	NA	NA	2019-11-30	#VALUE!	#VALUE!	NA	NA	NA	NA	NA	NA	NA
ADK05	66	1544400	ADK_cam_18_96_709024_657989_20191130	1300593	2019-07-26	2020-01-30	189	2020	1	30	2	13	54	276	1.5	Moving	No reaction
ADK06	175	4095000	NA	NA	2019-07-25	#VALUE!	#VALUE!	NA	NA	NA	NA	NA	NA	NA
ADK07	111	2597400	NA	NA	2019-12-01	#VALUE!	#VALUE!	NA	NA	NA	NA	NA	NA	NA
ADK09	92	2152800	NA	NA	2019-11-29	#VALUE!	#VALUE!	NA	NA	NA	NA	NA	NA	NA
ADK10	95	2223000	NA	NA	2019-07-27	#VALUE!	#VALUE!	NA	NA	NA	NA	NA	NA	NA
ADK11	97	2269800	NA	NA	2019-04-02	#VALUE!	#VALUE!	NA	NA	NA	NA	NA	NA	NA
ADK12	90	2106000	ADK_cam_18_66_717995_660994_20190402	6180128	2019-04-02	2019-06-18	78	2019	6	18	19	19	8	1	5.5	Moving	No reaction
ADK12	90	2106000	ADK_cam_18_66_717995_660994_20190402	6180128	2019-04-02	2019-06-18	78	2019	6	18	19	19	10	1	5.5	Moving	No reaction
ADK12	90	2106000	ADK_cam_18_66_717995_660994_20190402	6180128	2019-12-02	2019-06-18	-166	2019	6	18	19	19	12	1	5.5	Moving	No reaction
ADK13	90	2106000	NA	NA	2019-12-03	#VALUE!	#VALUE!	NA	NA	NA	NA	NA	NA	NA
ADK14	90	2106000	ADK_cam_18_79_702986_663998_20191203	12290129	2019-12-03	2019-12-29	27	2019	12	29	18	46	30	277	5.5	Moving	No reaction
ADK14	90	2106000	ADK_cam_18_79_702986_663998_20191203	12290129	2019-12-03	2019-12-29	27	2019	12	29	18	46	54	277	0.5	Moving	No reaction
ADK14	90	2106000	ADK_cam_18_79_702986_663998_20191203	1070267	2019-12-03	2020-01-07	36	2020	1	7	20	35	23	279	5.5	Moving	No reaction
ADK14	90	2106000	ADK_cam_18_79_702986_663998_20191203	1070267	2019-12-03	2020-01-07	36	2020	1	7	20	35	25	279	4.5	Inspection	With reaction
ADK14	90	2106000	ADK_cam_18_79_702986_663998_20191203	1070267	2019-11-28	2020-01-07	41	2020	1	7	20	35	27	279	4.5	Inspection	With reaction
ADK15	97	2269800	ADK_cam_18_84_709005_663971_20191228	11300008	2019-11-28	2019-11-30	3	2019	11	30	23	59	13	282	9	Moving	No reaction
ADK15	97	2269800	ADK_cam_18_84_709005_663971_20191228	11300008	2019-11-28	2019-11-30	3	2019	11	30	23	59	15	282	9	Moving	No reaction
ADK15	97	2269800	ADK_cam_18_84_709005_663971_20191228	11300008	2019-11-28	2019-11-30	3	2019	11	30	23	59	17	282	7.5	Moving	No reaction
ADK15	97	2269800	ADK_cam_18_84_709005_663971_20191228	11300008	2019-11-28	2019-11-30	3	2019	11	30	23	59	19	282	7.5	Moving	No reaction
ADK15	97	2269800	ADK_cam_18_84_709005_663971_20191228	11300008	2019-11-28	2019-11-30	3	2019	11	30	23	59	21	282	7.5	Feeding/foraging	No reaction
ADK15	97	2269800	ADK_cam_18_84_709005_663971_20191228	11300008	2019-11-28	2019-11-30	3	2019	11	30	23	59	23	282	7.5	Feeding/foraging	No reaction
ADK15	97	2269800	ADK_cam_18_84_709005_663971_20191228	11300008	2019-11-28	2019-11-30	3	2019	11	30	23	59	25	282	7.5	Feeding/foraging	No reaction
ADK15	97	2269800	ADK_cam_18_84_709005_663971_20191228	11300008	2019-11-28	2019-11-30	3	2019	11	30	23	59	27	282	7.5	Feeding/foraging	No reaction
ADK15	97	2269800	ADK_cam_18_84_709005_663971_20191228	11300008	2019-11-28	2019-11-30	3	2019	11	30	23	59	29	282	7.5	Feeding/foraging	No reaction
ADK15	97	2269800	ADK_cam_18_84_709005_663971_20191228	11300008	2019-11-28	2019-11-30	3	2019	11	30	23	59	31	282	7.5	Feeding/foraging	No reaction
ADK15	97	2269800	ADK_cam_18_84_709005_663971_20191228	11300008	2019-11-28	2019-11-30	3	2019	11	30	23	59	33	282	7.5	Feeding/foraging	No reaction
ADK15	97	2269800	ADK_cam_18_84_709005_663971_20191228	11300008	2019-11-28	2019-11-30	3	2019	11	30	23	59	35	282	7.5	Feeding/foraging	No reaction
ADK15	97	2269800	ADK_cam_18_84_709005_663971_20191228	11300008	2019-11-28	2019-11-30	3	2019	11	30	23	59	37	282	6.5	Feeding/foraging	No reaction
ADK15	97	2269800	ADK_cam_18_84_709005_663971_20191228	11300008	2019-11-28	2019-11-30	3	2019	11	30	23	59	39	282	6.5	Feeding/foraging	No reaction
ADK15	97	2269800	ADK_cam_18_84_709005_663971_20191228	11300008	2019-11-28	2019-11-30	3	2019	11	30	23	59	41	282	6.5	Feeding/foraging	No reaction
ADK15	97	2269800	ADK_cam_18_84_709005_663971_20191228	11300008	2019-11-28	2019-11-30	3	2019	11	30	23	59	43	282	6.5	Feeding/foraging	No reaction
ADK15	97	2269800	ADK_cam_18_84_709005_663971_20191228	11300008	2019-11-28	2019-11-30	3	2019	11	30	23	59	45	282	6.5	Feeding/foraging	No reaction
ADK15	97	2269800	ADK_cam_18_84_709005_663971_20191228	11300008	2019-11-28	2019-11-30	3	2019	11	30	23	59	47	282	6.5	Feeding/foraging	No reaction
ADK15	97	2269800	ADK_cam_18_84_709005_663971_20191228	11300008	2019-11-28	2019-11-30	3	2019	11	30	23	59	49	282	6.5	Feeding/foraging	No reaction
ADK15	97	2269800	ADK_cam_18_84_709005_663971_20191228	11300008	2019-11-28	2019-11-30	3	2019	11	30	23	59	51	282	6.5	Feeding/foraging	No reaction
ADK15	97	2269800	ADK_cam_18_84_709005_663971_20191228	11300008	2019-11-28	2019-11-30	3	2019	11	30	23	59	53	282	6.5	Feeding/foraging	No reaction
ADK15	97	2269800	ADK_cam_18_84_709005_663971_20191228	11300008	2019-11-28	2019-11-30	3	2019	11	30	23	59	55	282	6.5	Feeding/foraging	No reaction
ADK15	97	2269800	ADK_cam_18_84_709005_663971_20191228	11300008	2019-11-28	2019-11-30	3	2019	11	30	23	59	57	282	6.5	Feeding/foraging	No reaction
ADK15	97	2269800	ADK_cam_18_84_709005_663971_20191228	11300008	2019-11-28	2019-11-30	3	2019	11	30	23	59	59	282	6.5	Feeding/foraging	No reaction
ADK15	97	2269800	ADK_cam_18_84_709005_663971_20191228	11300008	2019-11-28	2019-11-30	3	2019	11	30	0	0	1	282	6.5	Feeding/foraging	No reaction
ADK15	97	2269800	ADK_cam_18_84_709005_663971_20191228	11300008	2019-11-28	2019-11-30	3	2019	11	30	0	0	3	282	6.5	Feeding/foraging	No reaction
ADK15	97	2269800	ADK_cam_18_84_709005_663971_20191228	11300008	2019-11-28	2019-11-30	3	2019	11	30	0	0	5	282	6.5	Feeding/foraging	No reaction
ADK15	97	2269800	ADK_cam_18_84_709005_663971_20191228	11300008	2019-11-28	2019-11-30	3	2019	11	30	0	0	7	282	6.5	Feeding/foraging	No reaction
ADK15	97	2269800	ADK_cam_18_84_709005_663971_20191228	11300008	2019-11-28	2019-11-30	3	2019	11	30	0	0	9	282	6.5	Feeding/foraging	No reaction
ADK15	97	2269800	ADK_cam_18_84_709005_663971_20191228	11300008	2019-11-28	2019-11-30	3	2019	11	30	0	0	11	282	6.5	Feeding/foraging	No reaction
ADK15	97	2269800	ADK_cam_18_84_709005_663971_20191228	12010009	2019-11-28	2019-12-01	4	2019	12	1	0	0	27	283	7.5	Feeding/foraging	No reaction
ADK15	97	2269800	ADK_cam_18_84_709005_663971_20191228	12010009	2019-11-28	2019-12-01	4	2019	12	1	0	0	29	283	7.5	Feeding/foraging	No reaction
ADK15	97	2269800	ADK_cam_18_84_709005_663971_20191228	12010009	2019-11-28	2019-12-01	4	2019	12	1	0	0	31	283	7.5	Feeding/foraging	No reaction
ADK15	97	2269800	ADK_cam_18_84_709005_663971_20191228	12010009	2019-11-28	2019-12-01	4	2019	12	1	0	0	33	283	7.5	Feeding/foraging	No reaction
ADK15	97	2269800	ADK_cam_18_84_709005_663971_20191228	12010009	2019-11-28	2019-12-01	4	2019	12	1	0	0	35	283	7.5	Feeding/foraging	No reaction
ADK15	97	2269800	ADK_cam_18_84_709005_663971_20191228	12010009	2019-11-28	2019-12-01	4	2019	12	1	0	0	37	283	7.5	Feeding/foraging	No reaction
ADK15	97	2269800	ADK_cam_18_84_709005_663971_20191228	12010009	2019-11-28	2019-12-01	4	2019	12	1	0	0	39	283	7.5	Feeding/foraging	No reaction
ADK15	97	2269800	ADK_cam_18_84_709005_663971_20191228	12010009	2019-11-28	2019-12-01	4	2019	12	1	0	0	41	283	7.5	Feeding/foraging	No reaction
ADK15	97	2269800	ADK_cam_18_84_709005_663971_20191228	12010009	2019-11-28	2019-12-01	4	2019	12	1	0	0	43	283	7.5	Feeding/foraging	No reaction
ADK15	97	2269800	ADK_cam_18_84_709005_663971_20191228	12010009	2019-11-28	2019-12-01	4	2019	12	1	0	0	45	283	7.5	Feeding/foraging	No reaction
ADK15	97	2269800	ADK_cam_18_84_709005_663971_20191228	12010009	2019-11-28	2019-12-01	4	2019	12	1	0	0	47	283	7.5	Feeding/foraging	No reaction
ADK15	97	2269800	ADK_cam_18_84_709005_663971_20191228	12010009	2019-11-28	2019-12-01	4	2019	12	1	0	0	49	283	7.5	Feeding/foraging	No reaction
ADK15	97	2269800	ADK_cam_18_84_709005_663971_20191228	12010009	2019-11-28	2019-12-01	4	2019	12	1	0	0	51	283	7.5	Feeding/foraging	No reaction
ADK15	97	2269800	ADK_cam_18_84_709005_663971_20191228	12010009	2019-11-28	2019-12-01	4	2019	12	1	0	0	53	283	7.5	Feeding/foraging	No reaction
ADK15	97	2269800	ADK_cam_18_84_709005_663971_20191228	12010009	2019-11-28	2019-12-01	4	2019	12	1	0	0	55	283	7.5	Feeding/foraging	No reaction
ADK15	97	2269800	ADK_cam_18_84_709005_663971_20191228	12010009	2019-11-28	2019-12-01	4	2019	12	1	0	0	57	283	7.5	Feeding/foraging	No reaction
ADK15	97	2269800	ADK_cam_18_84_709005_663971_20191228	12010009	2019-11-28	2019-12-01	4	2019	12	1	0	0	59	283	7.5	Feeding/foraging	No reaction
ADK15	97	2269800	ADK_cam_18_84_709005_663971_20191228	12010009	2019-11-28	2019-12-01	4	2019	12	1	0	1	1	283	7.5	Feeding/foraging	No reaction
ADK15	97	2269800	ADK_cam_18_84_709005_663971_20191228	12010009	2019-11-28	2019-12-01	4	2019	12	1	0	1	3	283	7.5	Feeding/foraging	No reaction
ADK15	97	2269800	ADK_cam_18_84_709005_663971_20191228	12010009	2019-11-28	2019-12-01	4	2019	12	1	0	1	5	283	7.5	Feeding/foraging	No reaction
ADK15	97	2269800	ADK_cam_18_84_709005_663971_20191228	12010009	2019-11-28	2019-12-01	4	2019	12	1	0	1	7	283	7.5	Feeding/foraging	No reaction
ADK15	97	2269800	ADK_cam_18_84_709005_663971_20191228	12010009	2019-11-28	2019-12-01	4	2019	12	1	0	1	9	283	7.5	Feeding/foraging	No reaction
ADK15	97	2269800	ADK_cam_18_84_709005_663971_20191228	12010009	2019-11-28	2019-12-01	4	2019	12	1	0	1	11	283	7.5	Feeding/foraging	No reaction
ADK15	97	2269800	ADK_cam_18_84_709005_663971_20191228	12010009	2019-11-28	2019-12-01	4	2019	12	1	0	1	13	283	7.5	Feeding/foraging	No reaction
ADK15	97	2269800	ADK_cam_18_84_709005_663971_20191228	12010009	2019-11-28	2019-12-01	4	2019	12	1	0	1	15	283	7.5	Feeding/foraging	No reaction
ADK15	97	2269800	ADK_cam_18_84_709005_663971_20191228	12010009	2019-11-28	2019-12-01	4	2019	12	1	0	1	17	283	7.5	Feeding/foraging	No reaction
ADK15	97	2269800	ADK_cam_18_84_709005_663971_20191228	12010009	2019-11-28	2019-12-01	4	2019	12	1	0	1	19	283	7.5	Feeding/foraging	No reaction
ADK15	97	2269800	ADK_cam_18_84_709005_663971_20191228	12010009	2019-11-28	2019-12-01	4	2019	12	1	0	1	21	283	7.5	Feeding/foraging	No reaction
ADK15	97	2269800	ADK_cam_18_84_709005_663971_20191228	12010009	2019-11-28	2019-12-01	4	2019	12	1	0	1	23	283	7.5	Feeding/foraging	No reaction
ADK15	97	2269800	ADK_cam_18_84_709005_663971_20191228	12010009	2019-11-28	2019-12-01	4	2019	12	1	0	1	25	283	7.5	Feeding/foraging	No reaction
ADK15	97	2269800	ADK_cam_18_84_709005_663971_20191228	12010010	2019-11-28	2019-12-01	4	2019	12	1	0	2	10	284	6.5	Moving	No reaction
ADK15	97	2269800	ADK_cam_18_84_709005_663971_20191228	12010010	2019-11-28	2019-12-01	4	2019	12	1	0	2	12	284	6.5	Moving	No reaction
ADK15	97	2269800	ADK_cam_18_84_709005_663971_20191228	12010010	2019-11-28	2019-12-01	4	2019	12	1	0	2	14	284	5.5	Moving	No reaction
ADK15	97	2269800	ADK_cam_18_84_709005_663971_20191228	12070023	2019-11-28	2019-12-07	10	2019	12	7	5	34	9	285	2.5	Feeding/foraging	No reaction
ADK15	97	2269800	ADK_cam_18_84_709005_663971_20191228	12070023	2019-11-28	2019-12-07	10	2019	12	7	5	34	11	285	2.5	Feeding/foraging	No reaction
ADK15	97	2269800	ADK_cam_18_84_709005_663971_20191228	12070023	2019-11-28	2019-12-07	10	2019	12	7	5	34	13	285	2.5	Feeding/foraging	No reaction
ADK15	97	2269800	ADK_cam_18_84_709005_663971_20191228	12070023	2019-11-28	2019-12-07	10	2019	12	7	5	34	15	285	2.5	Feeding/foraging	No reaction
ADK15	97	2269800	ADK_cam_18_84_709005_663971_20191228	12070023	2019-11-28	2019-12-07	10	2019	12	7	5	34	17	285	2.5	Feeding/foraging	No reaction
ADK15	97	2269800	ADK_cam_18_84_709005_663971_20191228	12070023	2019-11-28	2019-12-07	10	2019	12	7	5	34	19	285	2.5	Feeding/foraging	No reaction
ADK15	97	2269800	ADK_cam_18_84_709005_663971_20191228	12070023	2019-11-28	2019-12-07	10	2019	12	7	5	34	21	285	2.5	Feeding/foraging	No reaction
ADK15	97	2269800	ADK_cam_18_84_709005_663971_20191228	12070023	2019-11-28	2019-12-07	10	2019	12	7	5	34	23	285	2.5	Feeding/foraging	No reaction
ADK15	97	2269800	ADK_cam_18_84_709005_663971_20191228	12070023	2019-11-28	2019-12-07	10	2019	12	7	5	34	25	285	2.5	Feeding/foraging	No reaction
ADK15	97	2269800	ADK_cam_18_84_709005_663971_20191228	12070023	2019-11-28	2019-12-07	10	2019	12	7	5	34	27	285	2.5	Feeding/foraging	No reaction
ADK15	97	2269800	ADK_cam_18_84_709005_663971_20191228	12070023	2019-11-28	2019-12-07	10	2019	12	7	5	34	29	285	2.5	Feeding/foraging	No reaction
ADK15	97	2269800	ADK_cam_18_84_709005_663971_20191228	12070023	2019-11-28	2019-12-07	10	2019	12	7	5	34	31	285	2.5	Feeding/foraging	No reaction
ADK15	97	2269800	ADK_cam_18_84_709005_663971_20191228	12070023	2019-11-28	2019-12-07	10	2019	12	7	5	34	33	285	2.5	Feeding/foraging	No reaction
ADK15	97	2269800	ADK_cam_18_84_709005_663971_20191228	12070023	2019-11-28	2019-12-07	10	2019	12	7	5	34	35	285	2.5	Feeding/foraging	No reaction
ADK15	97	2269800	ADK_cam_18_84_709005_663971_20191228	12070023	2019-11-28	2019-12-07	10	2019	12	7	5	34	37	285	2.5	Feeding/foraging	No reaction
ADK15	97	2269800	ADK_cam_18_84_709005_663971_20191228	12070023	2019-11-28	2019-12-07	10	2019	12	7	5	34	39	285	2.5	Feeding/foraging	No reaction
ADK15	97	2269800	ADK_cam_18_84_709005_663971_20191228	12070023	2019-11-28	2019-12-07	10	2019	12	7	5	34	41	285	2.5	Feeding/foraging	No reaction
ADK15	97	2269800	ADK_cam_18_84_709005_663971_20191228	12070023	2019-11-28	2019-12-07	10	2019	12	7	5	34	43	285	2.5	Feeding/foraging	No reaction
ADK15	97	2269800	ADK_cam_18_84_709005_663971_20191228	12070023	2019-11-28	2019-12-07	10	2019	12	7	5	34	45	285	2.5	Feeding/foraging	No reaction
ADK15	97	2269800	ADK_cam_18_84_709005_663971_20191228	12070023	2019-11-28	2019-12-07	10	2019	12	7	5	34	47	285	2.5	Feeding/foraging	No reaction
ADK15	97	2269800	ADK_cam_18_84_709005_663971_20191228	12070024	2019-11-28	2019-12-07	10	2019	12	7	5	34	51	286	2.5	Feeding/foraging	No reaction
ADK15	97	2269800	ADK_cam_18_84_709005_663971_20191228	12070024	2019-11-28	2019-12-07	10	2019	12	7	5	34	53	286	2.5	Feeding/foraging	No reaction
ADK15	97	2269800	ADK_cam_18_84_709005_663971_20191228	12070024	2019-11-28	2019-12-07	10	2019	12	7	5	34	55	286	2.5	Feeding/foraging	No reaction
ADK15	97	2269800	ADK_cam_18_84_709005_663971_20191228	12070024	2019-11-28	2019-12-07	10	2019	12	7	5	34	57	286	2.5	Feeding/foraging	No reaction
ADK15	97	2269800	ADK_cam_18_84_709005_663971_20191228	12070024	2019-11-28	2019-12-07	10	2019	12	7	5	34	59	286	3.5	Feeding/foraging	No reaction
ADK15	97	2269800	ADK_cam_18_84_709005_663971_20191228	12070024	2019-11-28	2019-12-07	10	2019	12	7	5	35	1	286	3.5	Feeding/foraging	No reaction
ADK15	97	2269800	ADK_cam_18_84_709005_663971_20191228	12070024	2019-11-28	2019-12-07	10	2019	12	7	5	35	3	286	3.5	Feeding/foraging	No reaction
ADK15	97	2269800	ADK_cam_18_84_709005_663971_20191228	12070024	2019-11-28	2019-12-07	10	2019	12	7	5	35	5	286	3.5	Feeding/foraging	No reaction
ADK15	97	2269800	ADK_cam_18_84_709005_663971_20191228	12070024	2019-11-28	2019-12-07	10	2019	12	7	5	35	7	286	3.5	Feeding/foraging	No reaction
ADK15	97	2269800	ADK_cam_18_84_709005_663971_20191228	12070024	2019-11-28	2019-12-07	10	2019	12	7	5	35	9	286	3.5	Feeding/foraging	No reaction
ADK15	97	2269800	ADK_cam_18_84_709005_663971_20191228	12070024	2019-11-28	2019-12-07	10	2019	12	7	5	35	11	286	3.5	Feeding/foraging	No reaction
ADK15	97	2269800	ADK_cam_18_84_709005_663971_20191228	12070024	2019-11-28	2019-12-07	10	2019	12	7	5	35	13	286	3.5	Feeding/foraging	No reaction
ADK15	97	2269800	ADK_cam_18_84_709005_663971_20191228	12070024	2019-11-28	2019-12-07	10	2019	12	7	5	35	15	286	3.5	Feeding/foraging	No reaction
ADK15	97	2269800	ADK_cam_18_84_709005_663971_20191228	12070024	2019-11-28	2019-12-07	10	2019	12	7	5	35	17	286	3.5	Feeding/foraging	No reaction
ADK15	97	2269800	ADK_cam_18_84_709005_663971_20191228	12070024	2019-11-28	2019-12-07	10	2019	12	7	5	35	19	286	3.5	Feeding/foraging	No reaction
ADK15	97	2269800	ADK_cam_18_84_709005_663971_20191228	12070024	2019-11-28	2019-12-07	10	2019	12	7	5	35	21	286	3.5	Feeding/foraging	No reaction
ADK15	97	2269800	ADK_cam_18_84_709005_663971_20191228	12070024	2019-11-28	2019-12-07	10	2019	12	7	5	35	23	286	3.5	Feeding/foraging	No reaction
ADK15	97	2269800	ADK_cam_18_84_709005_663971_20191228	12070024	2019-11-28	2019-12-07	10	2019	12	7	5	35	25	286	3.5	Feeding/foraging	No reaction
ADK15	97	2269800	ADK_cam_18_84_709005_663971_20191228	12070024	2019-11-28	2019-12-07	10	2019	12	7	5	35	27	286	3.5	Feeding/foraging	No reaction
ADK15	97	2269800	ADK_cam_18_84_709005_663971_20191228	12070024	2019-11-28	2019-12-07	10	2019	12	7	5	35	29	286	3.5	Feeding/foraging	No reaction
ADK15	97	2269800	ADK_cam_18_84_709005_663971_20191228	12070024	2019-11-28	2019-12-07	10	2019	12	7	5	35	31	286	3.5	Feeding/foraging	No reaction
ADK15	97	2269800	ADK_cam_18_84_709005_663971_20191228	12070024	2019-11-28	2019-12-07	10	2019	12	7	5	35	33	286	3.5	Feeding/foraging	No reaction
ADK15	97	2269800	ADK_cam_18_84_709005_663971_20191228	12070024	2019-11-28	2019-12-07	10	2019	12	7	5	35	35	286	3.5	Feeding/foraging	No reaction
ADK15	97	2269800	ADK_cam_18_84_709005_663971_20191228	12070024	2019-11-28	2019-12-07	10	2019	12	7	5	35	37	286	3.5	Feeding/foraging	No reaction
ADK15	97	2269800	ADK_cam_18_84_709005_663971_20191228	12070024	2019-11-28	2019-12-07	10	2019	12	7	5	35	39	286	3.5	Feeding/foraging	No reaction
ADK15	97	2269800	ADK_cam_18_84_709005_663971_20191228	12070024	2019-11-28	2019-12-07	10	2019	12	7	5	35	41	286	3.5	Feeding/foraging	No reaction
ADK15	97	2269800	ADK_cam_18_84_709005_663971_20191228	12070024	2019-11-28	2019-12-07	10	2019	12	7	5	35	43	286	3.5	Feeding/foraging	No reaction
ADK15	97	2269800	ADK_cam_18_84_709005_663971_20191228	12070024	2019-11-28	2019-12-07	10	2019	12	7	5	35	45	286	3.5	Feeding/foraging	No reaction
ADK15	97	2269800	ADK_cam_18_84_709005_663971_20191228	12070024	2019-11-28	2019-12-07	10	2019	12	7	5	35	47	286	3.5	Feeding/foraging	No reaction
ADK15	97	2269800	ADK_cam_18_84_709005_663971_20191228	12070024	2019-11-28	2019-12-07	10	2019	12	7	5	35	49	286	3.5	Feeding/foraging	No reaction
ADK15	97	2269800	ADK_cam_18_84_709005_663971_20191228	12070025	2019-11-28	2019-12-07	10	2019	12	7	5	35	53	287	3.5	Feeding/foraging	No reaction
ADK15	97	2269800	ADK_cam_18_84_709005_663971_20191228	12070025	2019-11-28	2019-12-07	10	2019	12	7	5	35	55	287	3.5	Feeding/foraging	No reaction
ADK15	97	2269800	ADK_cam_18_84_709005_663971_20191228	12070025	2019-11-28	2019-12-07	10	2019	12	7	5	35	57	287	3.5	Feeding/foraging	No reaction
ADK15	97	2269800	ADK_cam_18_84_709005_663971_20191228	12070025	2019-11-28	2019-12-07	10	2019	12	7	5	35	59	287	3.5	Feeding/foraging	No reaction
ADK15	97	2269800	ADK_cam_18_84_709005_663971_20191228	12070025	2019-11-28	2019-12-07	10	2019	12	7	5	36	1	287	3.5	Feeding/foraging	No reaction
ADK15	97	2269800	ADK_cam_18_84_709005_663971_20191228	12070025	2019-11-28	2019-12-07	10	2019	12	7	5	36	3	287	3.5	Feeding/foraging	No reaction
ADK15	97	2269800	ADK_cam_18_84_709005_663971_20191228	12070025	2019-11-28	2019-12-07	10	2019	12	7	5	36	5	287	3.5	Feeding/foraging	No reaction
ADK15	97	2269800	ADK_cam_18_84_709005_663971_20191228	12070025	2019-11-28	2019-12-07	10	2019	12	7	5	36	7	287	3.5	Feeding/foraging	No reaction
ADK15	97	2269800	ADK_cam_18_84_709005_663971_20191228	12070025	2019-11-28	2019-12-07	10	2019	12	7	5	36	9	287	3.5	Feeding/foraging	No reaction
ADK15	97	2269800	ADK_cam_18_84_709005_663971_20191228	12070025	2019-11-28	2019-12-07	10	2019	12	7	5	36	11	287	3.5	Feeding/foraging	No reaction
ADK15	97	2269800	ADK_cam_18_84_709005_663971_20191228	12070025	2019-11-28	2019-12-07	10	2019	12	7	5	36	13	287	3.5	Feeding/foraging	No reaction
ADK15	97	2269800	ADK_cam_18_84_709005_663971_20191228	12070025	2019-11-28	2019-12-07	10	2019	12	7	5	36	15	287	3.5	Feeding/foraging	No reaction
ADK15	97	2269800	ADK_cam_18_84_709005_663971_20191228	12070025	2019-11-28	2019-12-07	10	2019	12	7	5	36	17	287	3.5	Feeding/foraging	No reaction
ADK15	97	2269800	ADK_cam_18_84_709005_663971_20191228	12070025	2019-11-28	2019-12-07	10	2019	12	7	5	36	19	287	3.5	Feeding/foraging	No reaction
ADK15	97	2269800	ADK_cam_18_84_709005_663971_20191228	12070025	2019-11-28	2019-12-07	10	2019	12	7	5	36	21	287	3.5	Feeding/foraging	No reaction
ADK15	97	2269800	ADK_cam_18_84_709005_663971_20191228	12070025	2019-11-28	2019-12-07	10	2019	12	7	5	36	23	287	3.5	Feeding/foraging	No reaction
ADK15	97	2269800	ADK_cam_18_84_709005_663971_20191228	12070025	2019-11-28	2019-12-07	10	2019	12	7	5	36	25	287	3.5	Feeding/foraging	No reaction
ADK15	97	2269800	ADK_cam_18_84_709005_663971_20191228	12070025	2019-11-28	2019-12-07	10	2019	12	7	5	36	27	287	3.5	Feeding/foraging	No reaction
ADK15	97	2269800	ADK_cam_18_84_709005_663971_20191228	12070025	2019-11-28	2019-12-07	10	2019	12	7	5	36	29	287	3.5	Feeding/foraging	No reaction
ADK15	97	2269800	ADK_cam_18_84_709005_663971_20191228	12070025	2019-11-28	2019-12-07	10	2019	12	7	5	36	31	287	3.5	Feeding/foraging	No reaction
ADK15	97	2269800	ADK_cam_18_84_709005_663971_20191228	12070025	2019-11-28	2019-12-07	10	2019	12	7	5	36	33	287	3.5	Feeding/foraging	No reaction
ADK15	97	2269800	ADK_cam_18_84_709005_663971_20191228	12070025	2019-11-28	2019-12-07	10	2019	12	7	5	36	35	287	3.5	Feeding/foraging	No reaction
ADK15	97	2269800	ADK_cam_18_84_709005_663971_20191228	12070025	2019-11-28	2019-12-07	10	2019	12	7	5	36	37	287	3.5	Feeding/foraging	No reaction
ADK15	97	2269800	ADK_cam_18_84_709005_663971_20191228	12070025	2019-11-28	2019-12-07	10	2019	12	7	5	36	39	287	3.5	Feeding/foraging	No reaction
ADK15	97	2269800	ADK_cam_18_84_709005_663971_20191228	12070025	2019-11-28	2019-12-07	10	2019	12	7	5	36	41	287	3.5	Feeding/foraging	No reaction
ADK15	97	2269800	ADK_cam_18_84_709005_663971_20191228	12070025	2019-11-28	2019-12-07	10	2019	12	7	5	36	43	287	3.5	Moving	No reaction
ADK15	97	2269800	ADK_cam_18_84_709005_663971_20191228	12070025	2019-11-28	2019-12-07	10	2019	12	7	5	36	45	287	3.5	Moving	No reaction
ADK15	97	2269800	ADK_cam_18_84_709005_663971_20191228	12070025	2019-11-28	2019-12-07	10	2019	12	7	5	36	47	287	3.5	Moving	No reaction
ADK15	97	2269800	ADK_cam_18_84_709005_663971_20191228	12070025	2019-11-28	2019-12-07	10	2019	12	7	5	36	49	287	3.5	Moving	No reaction
ADK15	97	2269800	ADK_cam_18_84_709005_663971_20191228	12070025	2019-11-28	2019-12-07	10	2019	12	7	5	36	51	287	3.5	Moving	No reaction
ADK15	97	2269800	ADK_cam_18_84_709005_663971_20191228	12070026	2019-11-28	2019-12-07	10	2019	12	7	5	36	54	288	3.5	Moving	No reaction
ADK15	97	2269800	ADK_cam_18_84_709005_663971_20191228	12070026	2019-11-28	2019-12-07	10	2019	12	7	5	36	56	288	3.5	Moving	No reaction
ADK15	97	2269800	ADK_cam_18_84_709005_663971_20191228	12070026	2019-04-01	2019-12-07	251	2019	12	7	5	36	58	288	3.5	Moving	No reaction
ADK16	89	2082600	NA	NA	2019-04-03	#VALUE!	#VALUE!	NA	NA	NA	NA	NA	NA	NA
ADK17	77	1801800	ADK_cam18_79_720984_663992_20190403	5170015	2019-04-03	2019-05-17	45	2019	5	17	2	15	26	2	3.5	Moving	No reaction
ADK17	77	1801800	ADK_cam18_79_720984_663992_20190403	5170015	2019-04-03	2019-05-17	45	2019	5	17	2	15	28	2	3.5	Moving	No reaction
ADK17	77	1801800	ADK_cam18_79_720984_663992_20190403	5170015	2019-04-03	2019-05-17	45	2019	5	17	2	15	30	2	3.5	Moving	No reaction
ADK17	77	1801800	ADK_cam18_79_720984_663992_20190403	5170015	2019-04-03	2019-05-17	45	2019	5	17	2	15	32	2	3.5	Fixation	With reaction
ADK17	77	1801800	ADK_cam18_79_720984_663992_20190403	5170015	2019-04-03	2019-05-17	45	2019	5	17	2	15	34	2	3.5	Fixation	With reaction
ADK17	77	1801800	ADK_cam18_79_720984_663992_20190403	5170015	2019-04-03	2019-05-17	45	2019	5	17	2	15	36	2	3.5	Inspection	With reaction
ADK17	77	1801800	ADK_cam18_79_720984_663992_20190403	5170015	2019-04-03	2019-05-17	45	2019	5	17	2	15	38	2	3.5	Inspection	With reaction
ADK17	77	1801800	ADK_cam18_79_720984_663992_20190403	5240016	2019-04-03	2019-05-24	52	2019	5	24	21	35	48	3	3.5	Moving	No reaction
ADK17	77	1801800	ADK_cam18_79_720984_663992_20190403	5240016	2019-04-03	2019-05-24	52	2019	5	24	21	35	50	3	3.5	Moving	No reaction
ADK17	77	1801800	ADK_cam18_79_720984_663992_20190403	6020019	2019-04-03	2019-06-02	61	2019	6	2	22	29	54	4	3.5	Moving	No reaction
ADK17	77	1801800	ADK_cam18_79_720984_663992_20190403	6020019	2019-04-03	2019-06-02	61	2019	6	2	22	29	56	4	3.5	Moving	No reaction
ADK17	77	1801800	ADK_cam18_79_720984_663992_20190403	6020019	2019-04-03	2019-06-02	61	2019	6	2	22	29	58	4	3.5	Moving	No reaction
ADK17	77	1801800	ADK_cam18_79_720984_663992_20190403	6020019	2019-04-03	2019-06-02	61	2019	6	2	22	30	2	4	3.5	Moving	No reaction
ADK17	77	1801800	ADK_cam18_79_720984_663992_20190403	6020020	2019-04-03	2019-06-02	61	2019	6	2	22	32	6	5	2.5	Attraction	With reaction
ADK17	77	1801800	ADK_cam18_79_720984_663992_20190403	6020020	2019-04-03	2019-06-02	61	2019	6	2	22	32	8	5	2.5	Attraction	With reaction
ADK17	77	1801800	ADK_cam18_79_720984_663992_20190403	6020020	2019-04-03	2019-06-02	61	2019	6	2	22	32	10	5	2.5	Inspection	With reaction
ADK17	77	1801800	ADK_cam18_79_720984_663992_20190403	6020020	2019-04-03	2019-06-02	61	2019	6	2	22	32	12	5	2.5	Inspection	With reaction
ADK17	77	1801800	ADK_cam18_79_720984_663992_20190403	6020020	2019-04-03	2019-06-02	61	2019	6	2	22	32	14	5	2.5	Inspection	With reaction
ADK17	77	1801800	ADK_cam18_79_720984_663992_20190403	6020020	2019-04-03	2019-06-02	61	2019	6	2	22	32	16	5	2.5	Inspection	With reaction
ADK17	77	1801800	ADK_cam18_79_720984_663992_20190403	6020020	2019-04-03	2019-06-02	61	2019	6	2	22	32	18	5	2.5	Inspection	With reaction
ADK17	77	1801800	ADK_cam18_79_720984_663992_20190403	6020020	2019-04-03	2019-06-02	61	2019	6	2	22	32	20	5	2.5	Inspection	With reaction
ADK17	77	1801800	ADK_cam18_79_720984_663992_20190403	6020020	2019-04-03	2019-06-02	61	2019	6	2	22	32	22	5	2.5	Attraction	With reaction
ADK17	77	1801800	ADK_cam18_79_720984_663992_20190403	6020020	2019-04-03	2019-06-02	61	2019	6	2	22	32	24	5	2.5	Attraction	With reaction
ADK17	77	1801800	ADK_cam18_79_720984_663992_20190403	6020020	2019-04-03	2019-06-02	61	2019	6	2	22	32	26	5	2.5	Attraction	With reaction
ADK17	77	1801800	ADK_cam18_79_720984_663992_20190403	6020020	2019-04-03	2019-06-02	61	2019	6	2	22	32	28	5	2.5	Attraction	With reaction
ADK17	77	1801800	ADK_cam18_79_720984_663992_20190403	6020020	2019-04-03	2019-06-02	61	2019	6	2	22	32	30	5	1.5	Attraction	With reaction
ADK17	77	1801800	ADK_cam18_79_720984_663992_20190403	6020020	2019-04-03	2019-06-02	61	2019	6	2	22	32	32	5	1.5	Avoidance	With reaction
ADK17	77	1801800	ADK_cam18_79_720984_663992_20190403	6020020	2019-04-03	2019-06-02	61	2019	6	2	22	32	34	5	5.5	Avoidance	With reaction
ADK17	77	1801800	ADK_cam18_79_720984_663992_20190403	6020020	2019-04-03	2019-06-02	61	2019	6	2	22	32	36	5	7.5	Avoidance	With reaction
ADK17	77	1801800	ADK_cam18_79_720984_663992_20190403	6020020	2019-04-03	2019-06-02	61	2019	6	2	22	32	38	5	9	Avoidance	With reaction
ADK17	77	1801800	ADK_cam18_79_720984_663992_20190403	6020020	2019-04-03	2019-06-02	61	2019	6	2	22	32	40	5	9	Avoidance	With reaction
ADK17	77	1801800	ADK_cam18_79_720984_663992_20190403	6020020	2019-04-03	2019-06-02	61	2019	6	2	22	32	42	5	9	Avoidance	With reaction
ADK17	77	1801800	ADK_cam18_79_720984_663992_20190403	6020020	2019-04-03	2019-06-02	61	2019	6	2	22	32	44	5	9	Avoidance	With reaction
ADK17	77	1801800	ADK_cam18_79_720984_663992_20190403	6020020	2019-09-08	2019-06-02	-97	2019	6	2	22	32	46	5	11	Avoidance	With reaction
ADK18	174	4071600	ADK_cam_18_97_693990_666976_20190908	9270045	2019-09-08	2019-09-27	20	2019	9	27	20	9	32	289	4.5	Moving	No reaction
ADK18	174	4071600	ADK_cam_18_97_693990_666976_20190908	9270045	2019-09-08	2019-09-27	20	2019	9	27	20	9	34	289	4.5	Moving	No reaction
ADK18	174	4071600	ADK_cam_18_97_693990_666976_20190908	9270045	2019-09-08	2019-09-27	20	2019	9	27	20	9	36	289	4.5	Moving	No reaction
ADK18	174	4071600	ADK_cam_18_97_693990_666976_20190908	9270045	2019-09-07	2019-09-27	21	2019	9	27	20	9	38	289	4.5	Moving	No reaction
ADK19	167	3907800	ADK_cam_18_109_699986_666994_20190907	12220229	2019-09-07	2019-12-22	107	2019	12	22	23	20	59	290	2.5	Moving	No reaction
ADK19	167	3907800	ADK_cam_18_109_699986_666994_20190907	12220229	2019-09-07	2019-12-22	107	2019	12	22	23	21	1	290	1.5	Moving	No reaction
ADK19	167	3907800	ADK_cam_18_109_699986_666994_20190907	12220229	2019-09-07	2019-12-22	107	2019	12	22	23	21	3	290	1.5	Moving	No reaction
ADK19	167	3907800	ADK_cam_18_109_699986_666994_20190907	12220229	2019-09-07	2019-12-22	107	2019	12	22	23	20	59	291	3.5	Moving	No reaction
ADK19	167	3907800	ADK_cam_18_109_699986_666994_20190907	12220229	2019-09-07	2019-12-22	107	2019	12	22	23	21	1	291	2.5	Moving	No reaction
ADK19	167	3907800	ADK_cam_18_109_699986_666994_20190907	12220229	2019-09-06	2019-12-22	108	2019	12	22	23	21	1	291	2.5	Moving	No reaction
ADK20	173	4048200	ADK_cam_18_114_705968_666981_20190906	10080354	2019-09-06	2019-10-08	33	2019	10	8	20	33	46	292	3.5	Moving	No reaction
ADK20	173	4048200	ADK_cam_18_114_705968_666981_20190906	10080354	2019-09-06	2019-10-08	33	2019	10	8	20	33	48	292	3.5	Moving	No reaction
ADK20	173	4048200	ADK_cam_18_114_705968_666981_20190906	11020618	2019-09-06	2019-11-02	58	2019	11	2	4	47	27	293	1.5	Moving	No reaction
ADK20	173	4048200	ADK_cam_18_114_705968_666981_20190906	11020618	2019-03-30	2019-11-02	218	2019	11	2	4	47	29	293	3.5	Moving	No reaction
ADK21	89	2082600	NA	NA	2019-04-01	#VALUE!	#VALUE!	NA	NA	NA	NA	NA	NA	NA
ADK22	89	2082600	ADK_cam18_83_717985_667016_20190401	6120386	2019-04-01	2019-06-12	73	2019	6	12	22	16	33	6	3.5	Moving	No reaction
ADK22	89	2082600	ADK_cam18_83_717985_667016_20190401	6120386	2019-04-01	2019-06-12	73	2019	6	12	22	16	33	6	3.5	Inspection	With reaction
ADK22	89	2082600	ADK_cam18_83_717985_667016_20190401	6120386	2019-04-01	2019-06-12	73	2019	6	12	22	16	33	6	3.5	Inspection	With reaction
ADK22	89	2082600	ADK_cam18_83_717985_667016_20190401	6120387	2019-04-01	2019-06-12	73	2019	6	12	22	16	40	7	3.5	Fixation	With reaction
ADK22	89	2082600	ADK_cam18_83_717985_667016_20190401	6120387	2019-04-01	2019-06-12	73	2019	6	12	22	16	40	7	3.5	Fixation	With reaction
ADK22	89	2082600	ADK_cam18_83_717985_667016_20190401	6120387	2019-04-01	2019-06-12	73	2019	6	12	22	16	40	7	3.5	Fixation	With reaction
ADK22	89	2082600	ADK_cam18_83_717985_667016_20190401	6120389	2019-04-01	2019-06-12	73	2019	6	12	22	16	55	8	2.5	Inspection	With reaction
ADK22	89	2082600	ADK_cam18_83_717985_667016_20190401	6120389	2019-04-01	2019-06-12	73	2019	6	12	22	16	55	8	2.5	Inspection	With reaction
ADK22	89	2082600	ADK_cam18_83_717985_667016_20190401	6120389	2019-04-01	2019-06-12	73	2019	6	12	22	16	55	8	2.5	Fixation	With reaction
ADK22	89	2082600	ADK_cam18_83_717985_667016_20190401	6120388	2019-04-01	2019-06-12	73	2019	6	12	22	16	48	245	2.5	Inspection	With reaction
ADK22	89	2082600	ADK_cam18_83_717985_667016_20190401	6120388	2019-04-01	2019-06-12	73	2019	6	12	22	16	48	245	2.5	Inspection	With reaction
ADK22	89	2082600	ADK_cam18_83_717985_667016_20190401	6120388	2019-09-08	2019-06-12	-87	2019	6	12	22	16	48	245	2.5	Inspection	With reaction
ADK23	172	4024800	NA	NA	2019-09-05	#VALUE!	#VALUE!	NA	NA	NA	NA	NA	NA	NA
ADK24	174	4071600	ADK_cam_18_61_703014_670002_20190905	1080265	2019-09-05	2020-01-08	126	2020	1	8	21	1	24	295	3.5	Moving	No reaction
ADK24	174	4071600	ADK_cam_18_61_703014_670002_20190905	1080265	2019-09-05	2020-01-08	126	2020	1	8	21	1	26	295	3.5	Moving	No reaction
ADK24	174	4071600	ADK_cam_18_61_703014_670002_20190905	1080265	2019-09-05	2020-01-08	126	2020	1	8	21	1	28	295	2.5	Moving	No reaction
ADK24	174	4071600	ADK_cam_18_61_703014_670002_20190905	1260289	2019-09-05	2020-01-26	144	2020	1	26	21	37	58	296	2.5	Moving	No reaction
ADK24	174	4071600	ADK_cam_18_61_703014_670002_20190905	1260289	2019-09-05	2020-01-26	144	2020	1	26	21	38	0	296	3.5	Moving	No reaction
ADK24	174	4071600	ADK_cam_18_61_703014_670002_20190905	11100197	2019-03-30	2019-11-10	226	2019	11	10	23	43	53	297	0.5	Moving	No reaction
ADK25	89	2082600	NA	NA	2019-03-29	#VALUE!	#VALUE!	NA	NA	NA	NA	NA	NA	NA
ADK26	88	2059200	ADK_cam18_105_715001_669999_20190329	5090063	2019-03-29	2019-05-09	42	2019	5	9	20	21	2	180	5.5	Moving	No reaction
ADK26	88	2059200	ADK_cam18_105_715001_669999_20190329	5090063	2019-03-29	2019-05-09	42	2019	5	9	20	21	4	180	1.5	Moving	No reaction
ADK26	88	2059200	ADK_cam18_105_715001_669999_20190329	4170034	2019-03-29	2019-04-17	20	2019	4	17	0	13	9	294	6.5	Moving	No reaction
ADK26	88	2059200	ADK_cam18_105_715001_669999_20190329	4170034	2019-03-29	2019-04-17	20	2019	4	17	0	13	11	294	6.5	Moving	No reaction
ADK26	88	2059200	ADK_cam18_105_715001_669999_20190329	4170034	2019-03-29	2019-04-17	20	2019	4	17	0	13	13	294	5.5	Moving	No reaction
ADK26	88	2059200	ADK_cam18_105_715001_669999_20190329	4170034	2019-03-29	2019-04-17	20	2019	4	17	0	13	15	294	4.5	Moving	No reaction
ADK26	88	2059200	ADK_cam18_105_715001_669999_20190329	4170034	2019-03-29	2019-04-17	20	2019	4	17	0	13	17	294	3.5	Moving	No reaction
ADK26	88	2059200	ADK_cam18_105_715001_669999_20190329	4170034	2019-05-29	2019-04-17	-41	2019	4	17	0	13	53	294	1.5	Moving	No reaction
ADK27	48	1123200	NA	NA	2019-09-09	#VALUE!	#VALUE!	NA	NA	NA	NA	NA	NA	NA
ADK28	170	3978000	ADK_cam_18_95_699983_672998_20190909	1290801	2019-09-09	2020-01-29	143	2020	1	29	19	20	4	299	3.5	Moving	No reaction
ADK28	170	3978000	ADK_cam_18_95_699983_672998_20190909	1290801	2019-09-04	2020-01-29	148	2020	1	29	19	20	6	299	2.5	Moving	No reaction
ADK29	174	4071600	ADK_cam_18_105_705998_673011_20190904	11020132	2019-09-04	2019-11-02	60	2019	11	2	3	3	46	301	6.5	Inspection	With reaction
ADK29	174	4071600	ADK_cam_18_105_705998_673011_20190904	11020132	2019-09-04	2019-11-02	60	2019	11	2	3	3	48	301	6.5	Inspection	With reaction
ADK29	174	4071600	ADK_cam_18_105_705998_673011_20190904	11020132	2019-09-04	2019-11-02	60	2019	11	2	3	3	50	301	6.5	Moving	No reaction
ADK29	174	4071600	ADK_cam_18_105_705998_673011_20190904	11020132	2019-09-04	2019-11-02	60	2019	11	2	3	3	52	301	6.5	Moving	No reaction
ADK29	174	4071600	ADK_cam_18_105_705998_673011_20190904	11020132	2019-09-04	2019-11-02	60	2019	11	2	3	3	54	301	6.5	Inspection	With reaction
ADK29	174	4071600	ADK_cam_18_105_705998_673011_20190904	11020132	2019-09-04	2019-11-02	60	2019	11	2	3	3	56	301	6.5	Moving	No reaction
ADK29	174	4071600	ADK_cam_18_105_705998_673011_20190904	11020132	2019-09-04	2019-11-02	60	2019	11	2	3	3	58	301	6.5	Moving	No reaction
ADK29	174	4071600	ADK_cam_18_105_705998_673011_20190904	11020132	2019-09-04	2019-11-02	60	2019	11	2	3	4	0	301	6.5	Moving	No reaction
ADK29	174	4071600	ADK_cam_18_105_705998_673011_20190904	11060140	2019-09-04	2019-11-06	64	2019	11	6	18	40	26	302	2.5	Fixation	With reaction
ADK29	174	4071600	ADK_cam_18_105_705998_673011_20190904	11060140	2019-09-04	2019-11-06	64	2019	11	6	18	40	28	302	1.5	Inspection	With reaction
ADK29	174	4071600	ADK_cam_18_105_705998_673011_20190904	11060140	2019-09-04	2019-11-06	64	2019	11	6	18	40	30	303	2.5	Fixation	With reaction
ADK29	174	4071600	ADK_cam_18_105_705998_673011_20190904	11060140	2019-09-04	2019-11-06	64	2019	11	6	18	40	32	303	1.5	Inspection	With reaction
ADK29	174	4071600	ADK_cam_18_105_705998_673011_20190904	11060140	2019-09-04	2019-11-06	64	2019	11	6	18	40	34	303	1.5	Inspection	With reaction
ADK29	174	4071600	ADK_cam_18_105_705998_673011_20190904	11130162	2019-09-04	2019-11-13	71	2019	11	13	21	25	58	304	1.5	Moving	No reaction
ADK29	174	4071600	ADK_cam_18_105_705998_673011_20190904	11130162	2019-09-04	2019-11-13	71	2019	11	13	21	26	0	304	1.5	Moving	No reaction
ADK29	174	4071600	ADK_cam_18_105_705998_673011_20190904	11130162	2019-09-04	2019-11-13	71	2019	11	13	21	26	2	304	1.5	Inspection	With reaction
ADK29	174	4071600	ADK_cam_18_105_705998_673011_20190904	11130162	2019-09-04	2019-11-13	71	2019	11	13	21	26	4	304	1.5	Inspection	With reaction
ADK29	174	4071600	ADK_cam_18_105_705998_673011_20190904	11130162	2019-09-04	2019-11-13	71	2019	11	13	21	26	6	304	1.5	Moving	No reaction
ADK29	174	4071600	ADK_cam_18_105_705998_673011_20190904	11130163	2019-09-04	2019-11-13	71	2019	11	13	21	26	10	305	2.5	Moving	No reaction
ADK29	174	4071600	ADK_cam_18_105_705998_673011_20190904	11130163	2019-09-04	2019-11-13	71	2019	11	13	21	26	12	305	2.5	Moving	No reaction
ADK29	174	4071600	ADK_cam_18_105_705998_673011_20190904	11200177	2019-09-04	2019-11-20	78	2019	11	20	5	26	2	306	1.5	Inspection	With reaction
ADK29	174	4071600	ADK_cam_18_105_705998_673011_20190904	11200177	2019-09-04	2019-11-20	78	2019	11	20	5	26	4	306	1.5	Inspection	With reaction
ADK29	174	4071600	ADK_cam_18_105_705998_673011_20190904	11200177	2019-09-04	2019-11-20	78	2019	11	20	5	26	6	306	1.5	Inspection	With reaction
ADK29	174	4071600	ADK_cam_18_105_705998_673011_20190904	11200177	2019-09-04	2019-11-20	78	2019	11	20	5	26	8	306	1.5	Inspection	With reaction
ADK29	174	4071600	ADK_cam_18_105_705998_673011_20190904	11200177	2019-09-04	2019-11-20	78	2019	11	20	5	26	10	306	1.5	Inspection	With reaction
ADK29	174	4071600	ADK_cam_18_105_705998_673011_20190904	11200178	2019-09-04	2019-11-20	78	2019	11	20	5	26	14	307	1.5	Moving	No reaction
ADK29	174	4071600	ADK_cam_18_105_705998_673011_20190904	12030219	2019-09-04	2019-12-03	91	2019	12	3	20	1	40	308	4.5	Moving	No reaction
ADK29	174	4071600	ADK_cam_18_105_705998_673011_20190904	12030219	2019-09-04	2019-12-03	91	2019	12	3	20	1	42	308	4.5	Moving	No reaction
ADK29	174	4071600	ADK_cam_18_105_705998_673011_20190904	12030219	2019-09-04	2019-12-03	91	2019	12	3	20	1	44	308	4.5	Moving	No reaction
ADK29	174	4071600	ADK_cam_18_105_705998_673011_20190904	12030220	2019-09-04	2019-12-03	91	2019	12	3	20	1	48	309	2.5	Attraction	With reaction
ADK29	174	4071600	ADK_cam_18_105_705998_673011_20190904	12030220	2019-09-04	2019-12-03	91	2019	12	3	20	1	50	309	1.5	Inspection	With reaction
ADK29	174	4071600	ADK_cam_18_105_705998_673011_20190904	12030220	2019-09-04	2019-12-03	91	2019	12	3	20	1	52	309	1.5	Inspection	With reaction
ADK29	174	4071600	ADK_cam_18_105_705998_673011_20190904	12030221	2019-09-04	2019-12-03	91	2019	12	3	20	1	56	310	1.5	Attraction	With reaction
ADK29	174	4071600	ADK_cam_18_105_705998_673011_20190904	12030221	2019-09-04	2019-12-03	91	2019	12	3	20	1	58	310	0.5	Attraction	With reaction
ADK29	174	4071600	ADK_cam_18_105_705998_673011_20190904	12030221	2019-09-04	2019-12-03	91	2019	12	3	20	2	0	310	0.5	Attraction	With reaction
ADK29	174	4071600	ADK_cam_18_105_705998_673011_20190904	12030222	2019-09-04	2019-12-03	91	2019	12	3	20	2	10	311	0.5	Attraction	With reaction
ADK29	174	4071600	ADK_cam_18_105_705998_673011_20190904	12170249	2019-09-04	2019-12-17	105	2019	12	17	4	5	42	312	0.5	Inspection	With reaction
ADK29	174	4071600	ADK_cam_18_105_705998_673011_20190904	12170249	2019-09-04	2019-12-17	105	2019	12	17	4	5	44	312	0.5	Moving	No reaction
ADK29	174	4071600	ADK_cam_18_105_705998_673011_20190904	12170249	2019-09-04	2019-12-17	105	2019	12	17	4	5	46	312	1.5	Moving	No reaction
ADK29	174	4071600	ADK_cam_18_105_705998_673011_20190904	12210257	2019-09-04	2019-12-21	109	2019	12	21	4	53	47	313	5.5	Moving	No reaction
ADK29	174	4071600	ADK_cam_18_105_705998_673011_20190904	12210257	2019-09-04	2019-12-21	109	2019	12	21	4	53	49	313	6.5	Moving	No reaction
ADK29	174	4071600	ADK_cam_18_105_705998_673011_20190904	12210257	2019-03-28	2019-12-21	269	2019	12	21	4	53	51	313	7.5	Moving	No reaction
ADK30	89	2082600	NA	NA	2019-03-29	#VALUE!	#VALUE!	NA	NA	NA	NA	NA	NA	NA
ADK31	85	1989000	NA	NA	2019-05-29	#VALUE!	#VALUE!	NA	NA	NA	NA	NA	NA	NA
ADK32	29	678600	NA	NA	2019-05-28	#VALUE!	#VALUE!	NA	NA	NA	NA	NA	NA	NA
ADK33	134	3135600	ADK_cam18_88_696986_675997_20190528	7160120	2019-05-28	2019-07-16	50	2019	7	16	5	37	51	9	9	Moving	No reaction
ADK33	134	3135600	ADK_cam18_88_696986_675997_20190528	7160120	2019-05-28	2019-07-16	50	2019	7	16	5	37	53	9	9	Moving	No reaction
ADK33	134	3135600	ADK_cam18_88_696986_675997_20190528	7160120	2019-05-28	2019-07-16	50	2019	7	16	5	37	55	9	9	Moving	No reaction
ADK33	134	3135600	ADK_cam18_88_696986_675997_20190528	7160120	2019-05-28	2019-07-16	50	2019	7	16	5	37	57	9	7.5	Moving	No reaction
ADK33	134	3135600	ADK_cam18_88_696986_675997_20190528	7160120	2019-05-28	2019-07-16	50	2019	7	16	5	37	59	9	6.5	Moving	No reaction
ADK33	134	3135600	ADK_cam18_88_696986_675997_20190528	7160120	2019-05-28	2019-07-16	50	2019	7	16	5	38	1	9	6.5	Moving	No reaction
ADK33	134	3135600	ADK_cam18_88_696986_675997_20190528	9020413	2019-05-28	2019-09-02	98	2019	9	2	23	4	31	10	1.5	Moving	No reaction
ADK33	134	3135600	ADK_cam18_88_696986_675997_20190528	9020413	2019-03-27	2019-09-02	160	2019	9	2	23	4	33	10	1.5	Moving	No reaction
ADK34	89	2082600	NA	NA	2019-05-27	#VALUE!	#VALUE!	NA	NA	NA	NA	NA	NA	NA
ADK35	30	702000	ADK_cam18_76_693989_679010_20190527	6030015	2019-05-27	2019-06-03	8	2019	6	3	19	19	56	11	3.5	Moving	No reaction
ADK35	30	702000	ADK_cam18_76_693989_679010_20190527	6030015	2019-05-27	2019-06-03	8	2019	6	3	19	19	58	11	3.5	Inspection	With reaction
ADK35	30	702000	ADK_cam18_76_693989_679010_20190527	6030015	2019-05-27	2019-06-03	8	2019	6	3	19	20	2	11	3.5	Inspection	With reaction
ADK35	30	702000	ADK_cam18_76_693989_679010_20190527	6030015	2019-05-27	2019-06-03	8	2019	6	3	19	20	4	11	3.5	Inspection	With reaction
ADK35	30	702000	ADK_cam18_76_693989_679010_20190527	6030015	2019-05-27	2019-06-03	8	2019	6	3	19	20	6	11	4.5	Moving	No reaction
ADK35	30	702000	ADK_cam18_76_693989_679010_20190527	6030015	2019-05-27	2019-06-03	8	2019	6	3	19	20	8	11	6.5	Moving	No reaction
ADK35	30	702000	ADK_cam18_76_693989_679010_20190527	6030015	2019-05-27	2019-06-03	8	2019	6	3	19	20	10	11	7.5	Moving	No reaction
ADK35	30	702000	ADK_cam18_76_693989_679010_20190527	6030015	2019-05-27	2019-06-03	8	2019	6	3	19	20	12	11	9	Moving	No reaction
ADK35	30	702000	ADK_cam18_76_693989_679010_20190527	6030015	2019-05-27	2019-06-03	8	2019	6	3	19	20	14	11	9	Moving	No reaction
ADK35	30	702000	ADK_cam18_76_693989_679010_20190527	6030015	2019-05-27	2019-06-03	8	2019	6	3	19	20	16	11	11	Moving	No reaction
ADK35	30	702000	ADK_cam18_76_693989_679010_20190527	6030015	2019-05-27	2019-06-03	8	2019	6	3	19	20	18	11	11	Moving	No reaction
ADK35	30	702000	ADK_cam18_76_693989_679010_20190527	6030015	2019-05-27	2019-06-03	8	2019	6	3	19	20	20	11	13.5	Moving	No reaction
ADK35	30	702000	ADK_cam18_76_693989_679010_20190527	6030015	2019-05-27	2019-06-03	8	2019	6	3	19	20	22	11	13.5	Moving	No reaction
ADK35	30	702000	ADK_cam18_76_693989_679010_20190527	6030015	2019-05-26	2019-06-03	9	2019	6	3	19	20	24	11	13.5	Moving	No reaction
ADK36	130	3042000	ADK_cam18_67_699969_679000_20190526	6040011	2019-05-26	2019-06-04	10	2019	6	4	5	49	28	181	4.5	Inspection	With reaction
ADK36	130	3042000	ADK_cam18_67_699969_679000_20190526	6040011	2019-05-26	2019-06-04	10	2019	6	4	5	49	30	181	4.5	Inspection	With reaction
ADK36	130	3042000	ADK_cam18_67_699969_679000_20190526	6040011	2019-05-26	2019-06-04	10	2019	6	4	5	49	32	181	4.5	Moving	No reaction
ADK36	130	3042000	ADK_cam18_67_699969_679000_20190526	6040011	2019-05-26	2019-06-04	10	2019	6	4	5	49	34	181	4.5	Moving	No reaction
ADK36	130	3042000	ADK_cam18_67_699969_679000_20190526	6040011	2019-05-26	2019-06-04	10	2019	6	4	5	49	36	181	4.5	Moving	No reaction
ADK36	130	3042000	ADK_cam18_67_699969_679000_20190526	6040011	2019-05-30	2019-06-04	6	2019	6	4	5	49	38	181	5.5	Moving	No reaction
ADK37	128	2995200	NA	NA	2019-05-12	#VALUE!	#VALUE!	NA	NA	NA	NA	NA	NA	NA
ADK39	92	2152800	NA	NA	2019-05-31	#VALUE!	#VALUE!	NA	NA	NA	NA	NA	NA	NA
ADK40	33	772200	NA	NA	2019-05-05	#VALUE!	#VALUE!	NA	NA	NA	NA	NA	NA	NA
ADK41	97	2269800	ADK_cam_18_73_700004_684995_20190505	7020046	2019-05-05	2019-07-02	59	2019	7	2	1	4	10	12	6.5	Moving	No reaction
ADK41	97	2269800	ADK_cam_18_73_700004_684995_20190505	7020046	2019-05-05	2019-07-02	59	2019	7	2	1	4	12	12	6.5	Moving	No reaction
ADK41	97	2269800	ADK_cam_18_73_700004_684995_20190505	7020046	2019-05-05	2019-07-02	59	2019	7	2	1	4	14	12	5.5	Inspection	With reaction
ADK41	97	2269800	ADK_cam_18_73_700004_684995_20190505	7020046	2019-05-05	2019-07-02	59	2019	7	2	1	4	16	12	5.5	Inspection	With reaction
ADK41	97	2269800	ADK_cam_18_73_700004_684995_20190505	7020046	2019-05-05	2019-07-02	59	2019	7	2	1	4	18	12	5.5	Moving	No reaction
ADK41	97	2269800	ADK_cam_18_73_700004_684995_20190505	7020046	2019-05-05	2019-07-02	59	2019	7	2	1	4	20	12	3.5	Moving	No reaction
ADK41	97	2269800	ADK_cam_18_73_700004_684995_20190505	7020046	2019-05-05	2019-07-02	59	2019	7	2	1	4	22	12	3.5	Moving	No reaction
ADK41	97	2269800	ADK_cam_18_73_700004_684995_20190505	7020046	2019-05-05	2019-07-02	59	2019	7	2	1	4	24	12	3.5	Moving	No reaction
ADK41	97	2269800	ADK_cam_18_73_700004_684995_20190505	7020053	2019-05-05	2019-07-02	59	2019	7	2	21	40	51	13	6.5	Moving	No reaction
ADK41	97	2269800	ADK_cam_18_73_700004_684995_20190505	7020053	2019-05-05	2019-07-02	59	2019	7	2	21	40	53	13	6.5	Moving	No reaction
ADK41	97	2269800	ADK_cam_18_73_700004_684995_20190505	7020053	2019-05-05	2019-07-02	59	2019	7	2	21	40	55	13	6.5	Moving	No reaction
ADK41	97	2269800	ADK_cam_18_73_700004_684995_20190505	7020053	2019-05-05	2019-07-02	59	2019	7	2	21	40	57	13	6.5	Moving	No reaction
ADK41	97	2269800	ADK_cam_18_73_700004_684995_20190505	7020053	2019-05-05	2019-07-02	59	2019	7	2	21	40	59	13	6.5	Moving	No reaction
ADK41	97	2269800	ADK_cam_18_73_700004_684995_20190505	8030129	2019-05-05	2019-08-03	91	2019	8	3	3	20	39	14	1.5	Attraction	With reaction
ADK41	97	2269800	ADK_cam_18_73_700004_684995_20190505	8030129	2019-05-05	2019-08-03	91	2019	8	3	3	20	41	14	1.5	Attraction	With reaction
ADK41	97	2269800	ADK_cam_18_73_700004_684995_20190505	8030129	2019-05-05	2019-08-03	91	2019	8	3	3	20	43	14	1.5	Attraction	With reaction
ADK41	97	2269800	ADK_cam_18_73_700004_684995_20190505	8030129	2019-05-05	2019-08-03	91	2019	8	3	3	20	45	14	1.5	Attraction	With reaction
ADK41	97	2269800	ADK_cam_18_73_700004_684995_20190505	8030129	2019-05-06	2019-08-03	90	2019	8	3	3	20	47	14	1.5	Attraction	With reaction
ADK42	97	2269800	NA	NA	2020-02-03	#VALUE!	#VALUE!	NA	NA	NA	NA	NA	NA	NA
ADK43	44	1029600	ADK_cam_18_72_691024_688019_20200203	2260067	2020-02-03	2020-02-26	24	2020	2	26	3	23	19	315	3.5	Inspection	With reaction
ADK43	44	1029600	ADK_cam_18_72_691024_688019_20200203	2260067	2020-02-03	2020-02-26	24	2020	2	26	3	23	21	315	3.5	Inspection	With reaction
ADK43	44	1029600	ADK_cam_18_72_691024_688019_20200203	2260067	2020-02-03	2020-02-26	24	2020	2	26	3	23	23	315	3.5	Moving	No reaction
ADK43	44	1029600	ADK_cam_18_72_691024_688019_20200203	2260067	2020-02-03	2020-02-26	24	2020	2	26	3	23	25	315	4.5	Moving	No reaction
ADK43	44	1029600	ADK_cam_18_72_691024_688019_20200203	2260067	2020-02-03	2020-02-26	24	2020	2	26	3	23	27	315	6.5	Moving	No reaction
ADK43	44	1029600	ADK_cam_18_72_691024_688019_20200203	2260067	2020-02-03	2020-02-26	24	2020	2	26	3	23	29	315	7.5	Moving	No reaction
ADK43	44	1029600	ADK_cam_18_72_691024_688019_20200203	2260067	2020-02-03	2020-02-26	24	2020	2	26	3	23	31	315	9	Moving	No reaction
ADK43	44	1029600	ADK_cam_18_72_691024_688019_20200203	2260067	2020-02-03	2020-02-26	24	2020	2	26	3	23	33	315	9	Moving	No reaction
ADK43	44	1029600	ADK_cam_18_72_691024_688019_20200203	2260067	2020-02-03	2020-02-26	24	2020	2	26	3	23	35	315	9	Moving	No reaction
ADK43	44	1029600	ADK_cam_18_72_691024_688019_20200203	2260067	2020-02-03	2020-02-26	24	2020	2	26	3	23	37	315	9	Moving	No reaction
ADK43	44	1029600	ADK_cam_18_72_691024_688019_20200203	3160126	2020-02-03	2020-03-16	43	2020	3	16	22	6	45	316	3.5	Feeding/foraging	No reaction
ADK43	44	1029600	ADK_cam_18_72_691024_688019_20200203	3160126	2020-02-03	2020-03-16	43	2020	3	16	22	6	47	316	3.5	Feeding/foraging	No reaction
ADK43	44	1029600	ADK_cam_18_72_691024_688019_20200203	3160126	2020-02-03	2020-03-16	43	2020	3	16	22	6	49	316	2.5	Feeding/foraging	No reaction
ADK43	44	1029600	ADK_cam_18_72_691024_688019_20200203	3160126	2020-02-03	2020-03-16	43	2020	3	16	22	6	51	316	2.5	Feeding/foraging	No reaction
ADK43	44	1029600	ADK_cam_18_72_691024_688019_20200203	3160126	2020-02-03	2020-03-16	43	2020	3	16	22	6	53	316	2.5	Feeding/foraging	No reaction
ADK43	44	1029600	ADK_cam_18_72_691024_688019_20200203	3160126	2020-02-03	2020-03-16	43	2020	3	16	22	6	55	316	2.5	Feeding/foraging	No reaction
ADK43	44	1029600	ADK_cam_18_72_691024_688019_20200203	3160126	2020-02-03	2020-03-16	43	2020	3	16	22	6	57	316	2.5	Feeding/foraging	No reaction
ADK43	44	1029600	ADK_cam_18_72_691024_688019_20200203	3160126	2020-02-03	2020-03-16	43	2020	3	16	22	6	59	316	2.5	Feeding/foraging	No reaction
ADK43	44	1029600	ADK_cam_18_72_691024_688019_20200203	3160126	2020-02-03	2020-03-16	43	2020	3	16	22	7	1	316	1.5	Feeding/foraging	No reaction
ADK43	44	1029600	ADK_cam_18_72_691024_688019_20200203	3160126	2020-02-03	2020-03-16	43	2020	3	16	22	7	3	316	1.5	Feeding/foraging	No reaction
ADK43	44	1029600	ADK_cam_18_72_691024_688019_20200203	3160126	2020-02-03	2020-03-16	43	2020	3	16	22	7	5	316	1.5	Feeding/foraging	No reaction
ADK43	44	1029600	ADK_cam_18_72_691024_688019_20200203	3160126	2020-02-03	2020-03-16	43	2020	3	16	22	7	7	316	1.5	Feeding/foraging	No reaction
ADK43	44	1029600	ADK_cam_18_72_691024_688019_20200203	3160126	2020-02-03	2020-03-16	43	2020	3	16	22	7	9	316	1.5	Feeding/foraging	No reaction
ADK43	44	1029600	ADK_cam_18_72_691024_688019_20200203	3160126	2020-02-03	2020-03-16	43	2020	3	16	22	7	11	316	1.5	Feeding/foraging	No reaction
ADK43	44	1029600	ADK_cam_18_72_691024_688019_20200203	3160126	2020-02-03	2020-03-16	43	2020	3	16	22	7	13	316	0.5	Feeding/foraging	No reaction
ADK43	44	1029600	ADK_cam_18_72_691024_688019_20200203	3160126	2020-02-03	2020-03-16	43	2020	3	16	22	7	15	316	0.5	Feeding/foraging	No reaction
ADK43	44	1029600	ADK_cam_18_72_691024_688019_20200203	3160126	2020-02-03	2020-03-16	43	2020	3	16	22	7	17	316	0.5	Feeding/foraging	No reaction
ADK43	44	1029600	ADK_cam_18_72_691024_688019_20200203	3160126	2020-02-03	2020-03-16	43	2020	3	16	22	7	19	316	0.5	Feeding/foraging	No reaction
ADK43	44	1029600	ADK_cam_18_72_691024_688019_20200203	3160126	2020-02-03	2020-03-16	43	2020	3	16	22	7	21	316	0.5	Feeding/foraging	No reaction
ADK43	44	1029600	ADK_cam_18_72_691024_688019_20200203	3160126	2020-02-03	2020-03-16	43	2020	3	16	22	7	23	316	0.5	Feeding/foraging	No reaction
ADK43	44	1029600	ADK_cam_18_72_691024_688019_20200203	3160126	2020-02-03	2020-03-16	43	2020	3	16	22	7	25	316	0.5	Feeding/foraging	No reaction
ADK43	44	1029600	ADK_cam_18_72_691024_688019_20200203	3160126	2020-02-03	2020-03-16	43	2020	3	16	22	7	27	316	0.5	Feeding/foraging	No reaction
ADK43	44	1029600	ADK_cam_18_72_691024_688019_20200203	3160126	2020-02-03	2020-03-16	43	2020	3	16	22	7	29	316	0.5	Feeding/foraging	No reaction
ADK43	44	1029600	ADK_cam_18_72_691024_688019_20200203	3160126	2020-02-03	2020-03-16	43	2020	3	16	22	7	31	316	0.5	Feeding/foraging	No reaction
ADK43	44	1029600	ADK_cam_18_72_691024_688019_20200203	3160126	2020-02-03	2020-03-16	43	2020	3	16	22	7	33	316	0.5	Attraction	With reaction
ADK43	44	1029600	ADK_cam_18_72_691024_688019_20200203	3160126	2020-02-03	2020-03-16	43	2020	3	16	22	7	35	316	1.5	Avoidance	With reaction
ADK43	44	1029600	ADK_cam_18_72_691024_688019_20200203	3160126	2020-02-03	2020-03-16	43	2020	3	16	22	7	37	316	2.5	Avoidance	With reaction
ADK43	44	1029600	ADK_cam_18_72_691024_688019_20200203	3160126	2020-02-03	2020-03-16	43	2020	3	16	22	7	39	316	2.5	Avoidance	With reaction
ADK43	44	1029600	ADK_cam_18_72_691024_688019_20200203	3160126	2020-02-03	2020-03-16	43	2020	3	16	22	7	41	316	2.5	Avoidance	With reaction
ADK43	44	1029600	ADK_cam_18_72_691024_688019_20200203	3160126	2020-02-03	2020-03-16	43	2020	3	16	22	7	43	316	2.5	Attraction	With reaction
ADK43	44	1029600	ADK_cam_18_72_691024_688019_20200203	3160127	2020-02-03	2020-03-16	43	2020	3	16	22	7	47	317	1.5	Attraction	With reaction
ADK43	44	1029600	ADK_cam_18_72_691024_688019_20200203	3160127	2020-02-03	2020-03-16	43	2020	3	16	22	7	49	317	1.5	Attraction	With reaction
ADK43	44	1029600	ADK_cam_18_72_691024_688019_20200203	3160127	2020-02-03	2020-03-16	43	2020	3	16	22	7	51	317	1.5	Attraction	With reaction
ADK43	44	1029600	ADK_cam_18_72_691024_688019_20200203	3160127	2020-02-03	2020-03-16	43	2020	3	16	22	7	53	317	1.5	Attraction	With reaction
ADK43	44	1029600	ADK_cam_18_72_691024_688019_20200203	3160127	2020-02-03	2020-03-16	43	2020	3	16	22	7	55	317	1.5	Attraction	With reaction
ADK43	44	1029600	ADK_cam_18_72_691024_688019_20200203	3160127	2020-02-03	2020-03-16	43	2020	3	16	22	7	57	317	1.5	Attraction	With reaction
ADK43	44	1029600	ADK_cam_18_72_691024_688019_20200203	3160127	2020-02-03	2020-03-16	43	2020	3	16	22	7	59	317	1.5	Attraction	With reaction
ADK43	44	1029600	ADK_cam_18_72_691024_688019_20200203	3160127	2020-02-03	2020-03-16	43	2020	3	16	22	8	1	317	1.5	Attraction	With reaction
ADK43	44	1029600	ADK_cam_18_72_691024_688019_20200203	3160128	2020-02-03	2020-03-16	43	2020	3	16	22	8	4	318	1.5	Attraction	With reaction
ADK43	44	1029600	ADK_cam_18_72_691024_688019_20200203	3160128	2020-02-03	2020-03-16	43	2020	3	16	22	8	6	318	0.5	Attraction	With reaction
ADK43	44	1029600	ADK_cam_18_72_691024_688019_20200203	3160128	2020-02-03	2020-03-16	43	2020	3	16	22	8	8	318	0.5	Attraction	With reaction
ADK43	44	1029600	ADK_cam_18_72_691024_688019_20200203	3160128	2020-02-03	2020-03-16	43	2020	3	16	22	8	10	318	0.5	Attraction	With reaction
ADK43	44	1029600	ADK_cam_18_72_691024_688019_20200203	3160129	2020-02-03	2020-03-16	43	2020	3	16	22	8	17	319	2.5	Avoidance	With reaction
ADK43	44	1029600	ADK_cam_18_72_691024_688019_20200203	3160129	2020-02-02	2020-03-16	44	2020	3	16	22	8	19	319	2.5	Avoidance	With reaction
ADK44	43	1006200	NA	NA	2019-05-05	#VALUE!	#VALUE!	NA	NA	NA	NA	NA	NA	NA
ADK45	96	2246400	NA	NA	2019-05-09	#VALUE!	#VALUE!	NA	NA	NA	NA	NA	NA	NA
ADK46	91	2129400	NA	NA	2019-05-08	#VALUE!	#VALUE!	NA	NA	NA	NA	NA	NA	NA
ADK47	98	2293200	NA	NA	2020-02-04	#VALUE!	#VALUE!	NA	NA	NA	NA	NA	NA	NA
ADK48	43	1006200	NA	NA	2020-02-08	#VALUE!	#VALUE!	NA	NA	NA	NA	NA	NA	NA
ADK49	43	1006200	NA	NA	2019-05-09	#VALUE!	#VALUE!	NA	NA	NA	NA	NA	NA	NA
ADK50	90	2106000	NA	NA	2019-05-08	#VALUE!	#VALUE!	NA	NA	NA	NA	NA	NA	NA
ADK51	97	2269800	NA	NA	2020-02-05	#VALUE!	#VALUE!	NA	NA	NA	NA	NA	NA	NA
ADK52	21	491400	NA	NA	2020-02-06	#VALUE!	#VALUE!	NA	NA	NA	NA	NA	NA	NA
ADK54	43	1006200	ADK_cam_18_62_693986_697021_20200206	2220019	2020-02-06	2020-02-22	17	2020	2	22	19	16	54	321	3.5	Inspection	With reaction
ADK54	43	1006200	ADK_cam_18_62_693986_697021_20200206	2220019	2020-02-06	2020-02-22	17	2020	2	22	19	16	56	321	3.5	Inspection	With reaction
ADK54	43	1006200	ADK_cam_18_62_693986_697021_20200206	2220019	2020-02-06	2020-02-22	17	2020	2	22	19	16	58	321	3.5	Inspection	With reaction
ADK54	43	1006200	ADK_cam_18_62_693986_697021_20200206	2220019	2020-02-06	2020-02-22	17	2020	2	22	19	17	0	321	3.5	Inspection	With reaction
ADK54	43	1006200	ADK_cam_18_62_693986_697021_20200206	2220019	2020-02-06	2020-02-22	17	2020	2	22	19	17	2	321	3.5	Inspection	With reaction
ADK54	43	1006200	ADK_cam_18_62_693986_697021_20200206	2220019	2020-02-06	2020-02-22	17	2020	2	22	19	17	4	321	4.5	Moving	No reaction
ADK54	43	1006200	ADK_cam_18_62_693986_697021_20200206	2220019	2020-02-06	2020-02-22	17	2020	2	22	19	17	6	321	5.5	Moving	No reaction
ADK54	43	1006200	ADK_cam_18_62_693986_697021_20200206	2220019	2020-02-06	2020-02-22	17	2020	2	22	19	17	8	321	6.5	Moving	No reaction
ADK54	43	1006200	ADK_cam_18_62_693986_697021_20200206	2220019	2020-02-06	2020-02-22	17	2020	2	22	19	17	10	321	7.5	Moving	No reaction
ADK54	43	1006200	ADK_cam_18_62_693986_697021_20200206	2220019	2020-02-06	2020-02-22	17	2020	2	22	19	17	12	321	9	Moving	No reaction
ADK54	43	1006200	ADK_cam_18_62_693986_697021_20200206	2220019	2020-02-06	2020-02-22	17	2020	2	22	19	17	14	321	9	Moving	No reaction
ADK54	43	1006200	ADK_cam_18_62_693986_697021_20200206	2220019	2020-02-06	2020-02-22	17	2020	2	22	19	17	16	321	11	Moving	No reaction
ADK54	43	1006200	ADK_cam_18_62_693986_697021_20200206	2220019	2020-02-06	2020-02-22	17	2020	2	22	19	17	18	321	11	Moving	No reaction
ADK54	43	1006200	ADK_cam_18_62_693986_697021_20200206	2270023	2020-02-06	2020-02-27	22	2020	2	27	3	53	38	322	3.5	Moving	No reaction
ADK54	43	1006200	ADK_cam_18_62_693986_697021_20200206	2270023	2020-02-06	2020-02-27	22	2020	2	27	3	53	40	322	4.5	Moving	No reaction
ADK54	43	1006200	ADK_cam_18_62_693986_697021_20200206	2270023	2020-02-06	2020-02-27	22	2020	2	27	3	53	42	322	5.5	Moving	No reaction
ADK54	43	1006200	ADK_cam_18_62_693986_697021_20200206	2270023	2020-02-06	2020-02-27	22	2020	2	27	3	53	44	322	6.5	Moving	No reaction
ADK54	43	1006200	ADK_cam_18_62_693986_697021_20200206	2270023	2020-02-06	2020-02-27	22	2020	2	27	3	53	46	322	7.5	Moving	No reaction
ADK54	43	1006200	ADK_cam_18_62_693986_697021_20200206	2270023	2020-02-06	2020-02-27	22	2020	2	27	3	53	48	322	9	Moving	No reaction
ADK54	43	1006200	ADK_cam_18_62_693986_697021_20200206	2270023	2020-02-06	2020-02-27	22	2020	2	27	3	53	50	322	9	Moving	No reaction
ADK54	43	1006200	ADK_cam_18_62_693986_697021_20200206	3110043	2020-02-06	2020-03-11	35	2020	3	11	22	37	25	323	3.5	Moving	No reaction
ADK54	43	1006200	ADK_cam_18_62_693986_697021_20200206	3110043	2020-02-06	2020-03-11	35	2020	3	11	22	37	27	323	4.5	Moving	No reaction
ADK54	43	1006200	ADK_cam_18_62_693986_697021_20200206	3110043	2020-02-06	2020-03-11	35	2020	3	11	22	37	29	323	5.5	Moving	No reaction
ADK54	43	1006200	ADK_cam_18_62_693986_697021_20200206	3110043	2020-02-06	2020-03-11	35	2020	3	11	22	37	31	323	6.5	Moving	No reaction
ADK54	43	1006200	ADK_cam_18_62_693986_697021_20200206	3110043	2020-02-06	2020-03-11	35	2020	3	11	22	37	33	323	7.5	Moving	No reaction
ADK54	43	1006200	ADK_cam_18_62_693986_697021_20200206	3110043	2020-02-06	2020-03-11	35	2020	3	11	22	37	35	323	9	Moving	No reaction
ADK54	43	1006200	ADK_cam_18_62_693986_697021_20200206	3130047	2020-02-06	2020-03-13	37	2020	3	13	5	48	37	324	7.5	Moving	No reaction
ADK54	43	1006200	ADK_cam_18_62_693986_697021_20200206	3130047	2020-02-06	2020-03-13	37	2020	3	13	5	48	39	324	6.5	Moving	No reaction
ADK54	43	1006200	ADK_cam_18_62_693986_697021_20200206	3130047	2020-02-06	2020-03-13	37	2020	3	13	5	48	41	324	5.5	Moving	No reaction
ADK54	43	1006200	ADK_cam_18_62_693986_697021_20200206	3130047	2020-02-06	2020-03-13	37	2020	3	13	5	48	43	324	4.5	Moving	No reaction
ADK54	43	1006200	ADK_cam_18_62_693986_697021_20200206	3130052	2020-02-06	2020-03-13	37	2020	3	13	19	32	40	325	3.5	Moving	No reaction
ADK54	43	1006200	ADK_cam_18_62_693986_697021_20200206	3130052	2020-02-06	2020-03-13	37	2020	3	13	19	32	42	325	4.5	Moving	No reaction
ADK54	43	1006200	ADK_cam_18_62_693986_697021_20200206	3130052	2020-02-06	2020-03-13	37	2020	3	13	19	32	44	325	5.5	Moving	No reaction
ADK54	43	1006200	ADK_cam_18_62_693986_697021_20200206	3130052	2020-02-06	2020-03-13	37	2020	3	13	19	32	46	325	6.5	Moving	No reaction
ADK54	43	1006200	ADK_cam_18_62_693986_697021_20200206	3130052	2020-02-06	2020-03-13	37	2020	3	13	19	32	48	325	7.5	Moving	No reaction
ADK54	43	1006200	ADK_cam_18_62_693986_697021_20200206	3130052	2020-02-06	2020-03-13	37	2020	3	13	19	32	50	325	9	Moving	No reaction
ADK54	43	1006200	ADK_cam_18_62_693986_697021_20200206	3130052	2020-02-06	2020-03-13	37	2020	3	13	19	32	52	325	9	Moving	No reaction
ADK54	43	1006200	ADK_cam_18_62_693986_697021_20200206	3200062	2020-02-06	2020-03-20	44	2020	3	20	0	42	18	326	3.5	Moving	No reaction
ADK54	43	1006200	ADK_cam_18_62_693986_697021_20200206	3200062	2020-02-06	2020-03-20	44	2020	3	20	0	42	20	326	4.5	Moving	No reaction
ADK54	43	1006200	ADK_cam_18_62_693986_697021_20200206	3200062	2020-02-06	2020-03-20	44	2020	3	20	0	42	22	326	4.5	Moving	No reaction
ADK54	43	1006200	ADK_cam_18_62_693986_697021_20200206	3200062	2020-02-06	2020-03-20	44	2020	3	20	0	42	24	326	5.5	Moving	No reaction
ADK54	43	1006200	ADK_cam_18_62_693986_697021_20200206	3200062	2020-02-06	2020-03-20	44	2020	3	20	0	42	26	326	6.5	Moving	No reaction
ADK54	43	1006200	ADK_cam_18_62_693986_697021_20200206	3200062	2020-02-06	2020-03-20	44	2020	3	20	0	42	28	326	7.5	Moving	No reaction
ADK54	43	1006200	ADK_cam_18_62_693986_697021_20200206	3200062	2020-02-06	2020-03-20	44	2020	3	20	0	42	30	326	9	Moving	No reaction
ADK54	43	1006200	ADK_cam_18_62_693986_697021_20200206	3200062	2020-02-05	2020-03-20	45	2020	3	20	0	42	32	326	9	Moving	No reaction
ADK55	44	1029600	NA	NA	2019-05-27	#VALUE!	#VALUE!	NA	NA	NA	NA	NA	NA	NA
Djap02	126	2948400	Djapadji_cam18_38_717977_571001_20190527	6260041	2019-05-27	2019-06-26	31	2019	6	26	2	57	16	327	3.5	Moving	No reaction
Djap02	126	2948400	Djapadji_cam18_38_717977_571001_20190527	6260041	2019-05-27	2019-06-26	31	2019	6	26	2	57	18	327	3.5	Moving	No reaction
Djap02	126	2948400	Djapadji_cam18_38_717977_571001_20190527	6260041	2019-05-27	2019-06-26	31	2019	6	26	2	57	20	327	3.5	Moving	No reaction
Djap02	126	2948400	Djapadji_cam18_38_717977_571001_20190527	6260041	2019-05-27	2019-06-26	31	2019	6	26	2	57	22	327	3.5	Moving	No reaction
Djap02	126	2948400	Djapadji_cam18_38_717977_571001_20190527	6260041	2019-05-27	2019-06-26	31	2019	6	26	2	57	24	327	3.5	Moving	No reaction
Djap02	126	2948400	Djapadji_cam18_38_717977_571001_20190527	6260041	2019-05-27	2019-06-26	31	2019	6	26	2	57	26	327	2.5	Moving	No reaction
Djap02	126	2948400	Djapadji_cam18_38_717977_571001_20190527	6260041	2019-05-27	2019-06-26	31	2019	6	26	2	57	28	327	2.5	Moving	No reaction
Djap02	126	2948400	Djapadji_cam18_38_717977_571001_20190527	6260041	2019-05-27	2019-06-26	31	2019	6	26	2	57	30	327	2.5	Moving	No reaction
Djap02	126	2948400	Djapadji_cam18_38_717977_571001_20190527	6260041	2019-05-27	2019-06-26	31	2019	6	26	2	57	32	327	2.5	Moving	No reaction
Djap02	126	2948400	Djapadji_cam18_38_717977_571001_20190527	6260041	2019-05-27	2019-06-26	31	2019	6	26	2	57	34	327	2.5	Moving	No reaction
Djap02	126	2948400	Djapadji_cam18_38_717977_571001_20190527	6260041	2019-05-27	2019-06-26	31	2019	6	26	2	57	36	327	2.5	Moving	No reaction
Djap02	126	2948400	Djapadji_cam18_38_717977_571001_20190527	6260041	2019-05-27	2019-06-26	31	2019	6	26	2	57	38	327	2.5	Moving	No reaction
Djap02	126	2948400	Djapadji_cam18_38_717977_571001_20190527	6260041	2019-05-27	2019-06-26	31	2019	6	26	2	57	40	327	2.5	Moving	No reaction
Djap02	126	2948400	Djapadji_cam18_38_717977_571001_20190527	6260041	2019-05-27	2019-06-26	31	2019	6	26	2	57	42	327	2.5	Moving	No reaction
Djap02	126	2948400	Djapadji_cam18_38_717977_571001_20190527	6260041	2019-05-27	2019-06-26	31	2019	6	26	2	57	44	327	2.5	Moving	No reaction
Djap02	126	2948400	Djapadji_cam18_38_717977_571001_20190527	6260041	2019-05-27	2019-06-26	31	2019	6	26	2	57	46	327	2.5	Moving	No reaction
Djap02	126	2948400	Djapadji_cam18_38_717977_571001_20190527	6260041	2019-05-27	2019-06-26	31	2019	6	26	2	56	56	328	3.5	Moving	No reaction
Djap02	126	2948400	Djapadji_cam18_38_717977_571001_20190527	6260041	2019-05-27	2019-06-26	31	2019	6	26	2	56	58	328	3.5	Moving	No reaction
Djap02	126	2948400	Djapadji_cam18_38_717977_571001_20190527	6260041	2019-05-27	2019-06-26	31	2019	6	26	2	57	0	328	3.5	Moving	No reaction
Djap02	126	2948400	Djapadji_cam18_38_717977_571001_20190527	6260041	2019-05-27	2019-06-26	31	2019	6	26	2	57	2	328	3.5	Moving	No reaction
Djap02	126	2948400	Djapadji_cam18_38_717977_571001_20190527	6260041	2019-05-27	2019-06-26	31	2019	6	26	2	57	4	328	3.5	Moving	No reaction
Djap02	126	2948400	Djapadji_cam18_38_717977_571001_20190527	6260041	2019-05-27	2019-06-26	31	2019	6	26	2	57	6	328	3.5	Moving	No reaction
Djap02	126	2948400	Djapadji_cam18_38_717977_571001_20190527	6260041	2019-05-27	2019-06-26	31	2019	6	26	2	57	8	328	3.5	Moving	No reaction
Djap02	126	2948400	Djapadji_cam18_38_717977_571001_20190527	6260041	2019-05-27	2019-06-26	31	2019	6	26	2	57	10	328	3.5	Moving	No reaction
Djap02	126	2948400	Djapadji_cam18_38_717977_571001_20190527	6260041	2019-05-27	2019-06-26	31	2019	6	26	2	57	12	328	3.5	Moving	No reaction
Djap02	126	2948400	Djapadji_cam18_38_717977_571001_20190527	6260041	2019-05-27	2019-06-26	31	2019	6	26	2	57	14	328	3.5	Moving	No reaction
Djap02	126	2948400	Djapadji_cam18_38_717977_571001_20190527	6260041	2019-05-27	2019-06-26	31	2019	6	26	2	57	16	328	3.5	Moving	No reaction
Djap02	126	2948400	Djapadji_cam18_38_717977_571001_20190527	6260041	2019-05-27	2019-06-26	31	2019	6	26	2	57	18	328	3.5	Moving	No reaction
Djap02	126	2948400	Djapadji_cam18_38_717977_571001_20190527	6260041	2019-05-27	2019-06-26	31	2019	6	26	2	57	20	328	3.5	Moving	No reaction
Djap02	126	2948400	Djapadji_cam18_38_717977_571001_20190527	6260041	2019-05-27	2019-06-26	31	2019	6	26	2	57	22	328	3.5	Moving	No reaction
Djap02	126	2948400	Djapadji_cam18_38_717977_571001_20190527	6260041	2019-05-27	2019-06-26	31	2019	6	26	2	57	24	328	3.5	Moving	No reaction
Djap02	126	2948400	Djapadji_cam18_38_717977_571001_20190527	6260041	2019-05-27	2019-06-26	31	2019	6	26	2	57	26	328	3.5	Moving	No reaction
Djap02	126	2948400	Djapadji_cam18_38_717977_571001_20190527	6260041	2019-05-27	2019-06-26	31	2019	6	26	2	57	28	328	3.5	Moving	No reaction
Djap02	126	2948400	Djapadji_cam18_38_717977_571001_20190527	6260041	2019-05-27	2019-06-26	31	2019	6	26	2	57	30	328	3.5	Moving	No reaction
Djap02	126	2948400	Djapadji_cam18_38_717977_571001_20190527	6260041	2019-05-27	2019-06-26	31	2019	6	26	2	57	32	328	3.5	Moving	No reaction
Djap02	126	2948400	Djapadji_cam18_38_717977_571001_20190527	6260041	2019-05-27	2019-06-26	31	2019	6	26	2	57	34	328	3.5	Moving	No reaction
Djap02	126	2948400	Djapadji_cam18_38_717977_571001_20190527	6260041	2019-05-27	2019-06-26	31	2019	6	26	2	57	36	328	3.5	Moving	No reaction
Djap02	126	2948400	Djapadji_cam18_38_717977_571001_20190527	6260041	2019-05-27	2019-06-26	31	2019	6	26	2	57	38	328	3.5	Moving	No reaction
Djap02	126	2948400	Djapadji_cam18_38_717977_571001_20190527	6260041	2019-05-27	2019-06-26	31	2019	6	26	2	57	40	328	3.5	Moving	No reaction
Djap02	126	2948400	Djapadji_cam18_38_717977_571001_20190527	6260041	2019-05-27	2019-06-26	31	2019	6	26	2	57	42	328	3.5	Moving	No reaction
Djap02	126	2948400	Djapadji_cam18_38_717977_571001_20190527	6260041	2019-05-27	2019-06-26	31	2019	6	26	2	57	44	328	3.5	Moving	No reaction
Djap02	126	2948400	Djapadji_cam18_38_717977_571001_20190527	6260041	2019-05-27	2019-06-26	31	2019	6	26	2	57	46	328	3.5	Moving	No reaction
Djap02	126	2948400	Djapadji_cam18_38_717977_571001_20190527	6260042	2019-05-27	2019-06-26	31	2019	6	26	2	57	49	329	3.5	Moving	No reaction
Djap02	126	2948400	Djapadji_cam18_38_717977_571001_20190527	6260042	2019-05-27	2019-06-26	31	2019	6	26	2	57	51	329	3.5	Moving	No reaction
Djap02	126	2948400	Djapadji_cam18_38_717977_571001_20190527	6260042	2019-05-27	2019-06-26	31	2019	6	26	2	57	53	329	3.5	Moving	No reaction
Djap02	126	2948400	Djapadji_cam18_38_717977_571001_20190527	6260042	2019-05-27	2019-06-26	31	2019	6	26	2	57	55	329	3.5	Moving	No reaction
Djap02	126	2948400	Djapadji_cam18_38_717977_571001_20190527	6260042	2019-05-27	2019-06-26	31	2019	6	26	2	57	57	329	3.5	Moving	No reaction
Djap02	126	2948400	Djapadji_cam18_38_717977_571001_20190527	6260042	2019-05-27	2019-06-26	31	2019	6	26	2	57	59	329	3.5	Moving	No reaction
Djap02	126	2948400	Djapadji_cam18_38_717977_571001_20190527	6260042	2019-05-27	2019-06-26	31	2019	6	26	2	58	1	329	2.5	Moving	No reaction
Djap02	126	2948400	Djapadji_cam18_38_717977_571001_20190527	6260042	2019-05-27	2019-06-26	31	2019	6	26	2	58	3	329	2.5	Moving	No reaction
Djap02	126	2948400	Djapadji_cam18_38_717977_571001_20190527	6260042	2019-05-27	2019-06-26	31	2019	6	26	2	58	5	329	2.5	Moving	No reaction
Djap02	126	2948400	Djapadji_cam18_38_717977_571001_20190527	6260042	2019-05-27	2019-06-26	31	2019	6	26	2	58	7	329	2.5	Moving	No reaction
Djap02	126	2948400	Djapadji_cam18_38_717977_571001_20190527	6260042	2019-05-27	2019-06-26	31	2019	6	26	2	58	9	329	2.5	Moving	No reaction
Djap02	126	2948400	Djapadji_cam18_38_717977_571001_20190527	6260042	2019-05-27	2019-06-26	31	2019	6	26	2	57	49	329	2.5	Moving	No reaction
Djap02	126	2948400	Djapadji_cam18_38_717977_571001_20190527	6260042	2019-05-27	2019-06-26	31	2019	6	26	2	57	51	329	2.5	Moving	No reaction
Djap02	126	2948400	Djapadji_cam18_38_717977_571001_20190527	6260042	2019-05-27	2019-06-26	31	2019	6	26	2	57	53	329	2.5	Moving	No reaction
Djap02	126	2948400	Djapadji_cam18_38_717977_571001_20190527	6260042	2019-05-27	2019-06-26	31	2019	6	26	2	57	55	329	2.5	Moving	No reaction
Djap02	126	2948400	Djapadji_cam18_38_717977_571001_20190527	6260042	2019-05-27	2019-06-26	31	2019	6	26	2	57	57	329	2.5	Moving	No reaction
Djap02	126	2948400	Djapadji_cam18_38_717977_571001_20190527	6260042	2019-05-27	2019-06-26	31	2019	6	26	2	57	59	329	2.5	Moving	No reaction
Djap02	126	2948400	Djapadji_cam18_38_717977_571001_20190527	6260042	2019-05-27	2019-06-26	31	2019	6	26	2	58	1	329	2.5	Moving	No reaction
Djap02	126	2948400	Djapadji_cam18_38_717977_571001_20190527	6260042	2019-05-27	2019-06-26	31	2019	6	26	2	58	3	329	2.5	Moving	No reaction
Djap02	126	2948400	Djapadji_cam18_38_717977_571001_20190527	6260042	2019-05-27	2019-06-26	31	2019	6	26	2	58	5	329	2.5	Moving	No reaction
Djap02	126	2948400	Djapadji_cam18_38_717977_571001_20190527	6260042	2019-05-27	2019-06-26	31	2019	6	26	2	58	7	329	2.5	Moving	No reaction
Djap02	126	2948400	Djapadji_cam18_38_717977_571001_20190527	6260042	2019-05-27	2019-06-26	31	2019	6	26	2	58	9	329	2.5	Moving	No reaction
Djap02	126	2948400	Djapadji_cam18_38_717977_571001_20190527	6260042	2019-05-27	2019-06-26	31	2019	6	26	2	58	11	329	2.5	Moving	No reaction
Djap02	126	2948400	Djapadji_cam18_38_717977_571001_20190527	7060054	2019-05-27	2019-07-06	41	2019	7	6	2	56	32	330	3.5	Moving	No reaction
Djap02	126	2948400	Djapadji_cam18_38_717977_571001_20190527	7060054	2019-05-27	2019-07-06	41	2019	7	6	2	56	34	330	3.5	Moving	No reaction
Djap02	126	2948400	Djapadji_cam18_38_717977_571001_20190527	7060054	2019-05-27	2019-07-06	41	2019	7	6	2	56	36	330	3.5	Moving	No reaction
Djap02	126	2948400	Djapadji_cam18_38_717977_571001_20190527	7060054	2019-05-27	2019-07-06	41	2019	7	6	2	56	38	330	3.5	Moving	No reaction
Djap02	126	2948400	Djapadji_cam18_38_717977_571001_20190527	7060054	2019-05-27	2019-07-06	41	2019	7	6	2	56	40	330	3.5	Moving	No reaction
Djap02	126	2948400	Djapadji_cam18_38_717977_571001_20190527	7060054	2019-05-27	2019-07-06	41	2019	7	6	2	56	42	330	3.5	Moving	No reaction
Djap02	126	2948400	Djapadji_cam18_38_717977_571001_20190527	7060054	2019-05-27	2019-07-06	41	2019	7	6	2	56	44	330	3.5	Moving	No reaction
Djap02	126	2948400	Djapadji_cam18_38_717977_571001_20190527	7060054	2019-05-27	2019-07-06	41	2019	7	6	2	56	46	330	3.5	Moving	No reaction
Djap02	126	2948400	Djapadji_cam18_38_717977_571001_20190527	7060054	2019-05-27	2019-07-06	41	2019	7	6	2	56	48	330	3.5	Moving	No reaction
Djap02	126	2948400	Djapadji_cam18_38_717977_571001_20190527	7060054	2019-05-27	2019-07-06	41	2019	7	6	2	56	50	330	3.5	Moving	No reaction
Djap02	126	2948400	Djapadji_cam18_38_717977_571001_20190527	7060054	2019-05-27	2019-07-06	41	2019	7	6	2	56	52	330	3.5	Moving	No reaction
Djap02	126	2948400	Djapadji_cam18_38_717977_571001_20190527	7060054	2019-05-27	2019-07-06	41	2019	7	6	2	56	54	330	3.5	Moving	No reaction
Djap02	126	2948400	Djapadji_cam18_38_717977_571001_20190527	7060054	2019-05-27	2019-07-06	41	2019	7	6	2	56	56	330	3.5	Moving	No reaction
Djap02	126	2948400	Djapadji_cam18_38_717977_571001_20190527	7060054	2019-05-27	2019-07-06	41	2019	7	6	2	56	58	330	3.5	Moving	No reaction
Djap02	126	2948400	Djapadji_cam18_38_717977_571001_20190527	7060054	2019-05-27	2019-07-06	41	2019	7	6	2	57	0	330	3.5	Moving	No reaction
Djap02	126	2948400	Djapadji_cam18_38_717977_571001_20190527	7060054	2019-05-27	2019-07-06	41	2019	7	6	2	57	2	330	3.5	Fixation	With reaction
Djap02	126	2948400	Djapadji_cam18_38_717977_571001_20190527	7060054	2019-05-27	2019-07-06	41	2019	7	6	2	57	4	330	2.5	Attraction	With reaction
Djap02	126	2948400	Djapadji_cam18_38_717977_571001_20190527	7060054	2019-05-27	2019-07-06	41	2019	7	6	2	57	6	330	2.5	Attraction	With reaction
Djap02	126	2948400	Djapadji_cam18_38_717977_571001_20190527	7060054	2019-05-27	2019-07-06	41	2019	7	6	2	57	8	330	1.5	Attraction	With reaction
Djap02	126	2948400	Djapadji_cam18_38_717977_571001_20190527	7060054	2019-05-27	2019-07-06	41	2019	7	6	2	57	10	330	0.5	Attraction	With reaction
Djap02	126	2948400	Djapadji_cam18_38_717977_571001_20190527	7060054	2019-05-27	2019-07-06	41	2019	7	6	2	57	12	330	0.5	Attraction	With reaction
[truncated: 3,041 more rows]

## Sheet: Pygmy_hippopotamus
Transect_ID	TIME_IN_PLACE_(DAYS)	EFFort	FILE_NAME	Video_Name	Starting_date	Date_observation	Time_observation	Year	Month	Day	Hour	Minute	Second	Ind_No	Distance_(m)	Behaviour	Reactivity
[truncated: 2,776 more rows]

[truncated: 1 more sheets: Western_chimpanzee]
